# Supplementary material for: Remote immune processes revealed by immune-derived circulating cell-free DNA
Source: eLife. 2021 Nov 29;10:e70520. doi: 10.7554/eLife.70520 (PMC8651286; doi:10.7554/eLife.70520)
Supplement: Supplementary file 1. [file elife-70520-supp1.xlsx]

## Sheet: abbreviation
WB=whole blood
CBC=complete blood counts
genome equivalents/ml (GE/ml) where calculated as follows:
cfDNA concentration(ng/ml)*303*percentage of measured marker
the explantion for the calculation is writen in detail in the method section

## Sheet: Healthy cohort Fig 2
related o figure 2
sample type				cfDNA	cfDNA	cfDNA	cfDNA	cfDNA	cfDNA	cfDNA	cfDNA	cfDNA	cfDNA	cfDNA	cfDNA	cfDNA	cfDNA	cfDNA	cfDNA	cfDNA	cfDNA	cfDNA	cfDNA	cfDNA	cfDNA	cfDNA	cfDNA	cfDNA	cfDNA	cfDNA	cfDNA	cfDNA	cfDNA	cfDNA	cfDNA	cfDNA	cfDNA	cfDNA	cfDNA	cfDNA	cfDNA	cfDNA	cfDNA	cfDNA	cfDNA	cfDNA	cfDNA	cfDNA	cfDNA
units			ng/ml	GE/ml	GE/ml	GE/ml	GE/ml	GE/ml	GE/ml	GE/ml	GE/ml	GE/ml	GE/ml	GE/ml	GE/ml	GE/ml	GE/ml	GE/ml	GE/ml	GE/ml	GE/ml	GE/ml	GE/ml	GE/ml	GE/ml	GE/ml	GE/ml	GE/ml	%	%	%	%	%	%	%	%	%	%	%	%	%	%	%	%	%	%	%	%	%
cell type				B cells	B cells	B cells	CD8	CD8	Eosinophils	Eosinophils	Eosinophils	Granulocytes	Granulocytes	Monocytes	Monocytes	Neutrophils	T cell	T cell	Tregs	Tregs	B cells	CD8	Eosinophils	Granulocytes	Monocytes	Neutrophils	T cell	Tregs	B cells	B cells	B cells	CD8	CD8	Eosinophils	Eosinophils	Eosinophils	Granulocytes	Granulocytes	Monocytes	Monocytes	Neutrophils	T cell	T cell	Tregs	Tregs	B cells	CD8	Eosinophils	Granulocytes
	age	gender	Total cfDNA	BCELL3	BCELL1	BCELL2	CD8A	CD8B	EOSI3	EOSI2	EOSI1	NEUT2	NEUT1	MONO1	MONO2	NEUT3	TCELL1	TCELL2	TREG1	TREG2	average	average	average	average	average	average	average	average	BCELL3	BCELL1	BCELL2	CD8A	CD8B	EOSI3	EOSI2	EOSI1	NEUT2	NEUT1	MONO1	MONO2	NEUT3	TCELL1	TCELL2	TREG1	TREG2	average	average	average	average
C10	8	m	6.31001	56.4998	78.6367	14.6001	0	13.6944	94.3457	247.812	349.196	247.101	161.445	23.3121	15.19	0	NA	49.9122	6.84722	94.3457	298.504	204.273	19.2511	0	NA	NA	NA	NA	2.95511	4.11295	0.763631	0	0.716262	NA	NA	4.93458	12.9614	18.2641	12.9241	8.44406	NA	1.2193	0.794483	0	NA	2.61056	0.358131	4.93458	15.6127
C11	8	m	3.73333	24.2365	6.21816	3.38605	11.1635	3.97819	50.9589	342.387	379.105	61.0848	75.5394	12.8325	14.0712	0	0	11.2802	7.57085	50.9589	360.746	68.3121	13.4519	0	NA	NA	NA	NA	2.14254	0.549695	0.299333	0.986872	0.351679	NA	NA	4.50485	30.2676	33.5135	5.4	6.67781	NA	1.13442	1.24392	0	0	0.997191	0.669276	4.50485	31.8906
C12	15	f	4.675	17.5859	10.7059	8.36778	18.0617	3.19442	45.6332	107.495	277.043	160.635	130.554	27.9111	38.6333	0	NA	12.2199	10.6281	45.6332	192.269	145.595	33.2722	0	NA	NA	NA	NA	1.24148	0.755784	0.590725	1.27507	0.22551	NA	NA	3.22149	7.58866	19.5579	11.3401	9.21649	NA	1.97039	2.72732	0	NA	0.862664	0.750292	3.22149	13.5733
C13	10	m	4.77778	47.2099	4.97214	9.31526	0	8.23272	131.466	252.184	415.729	138.565	122.353	4.91164	23.0125	0	0	20.4991	4.11636	131.466	333.957	130.459	13.9621	0	NA	NA	NA	NA	3.2611	0.343458	0.643466	0	0.568688	NA	NA	9.0812	17.42	28.7172	9.57157	8.45171	NA	0.33928	1.58963	0	0	1.41601	0.284344	9.0812	23.0686
C14	16	f	14.175	42.783	28.6797	0	0	7.51414	78.0528	1171.64	1680.05	461.556	265.278	48.1715	20.3283	0.141484	0	23.8209	3.75707	78.0528	1425.85	363.417	34.2499	0.0707419	NA	NA	NA	NA	0.996106	0.667742	0	0	0.17495	NA	NA	1.81728	27.2791	39.1163	10.7463	6.17641	NA	1.12156	0.473298	0.00329413	0	0.554616	0.0874749	1.81728	33.1977
C15	15	f	2.75	19.4229	6.1864	7.0418	4.93999	3.48634	32.7175	232.554	347.321	97.6291	79.3283	14.8921	11.7902	0.974582	0.862729	10.8837	4.21316	32.7175	289.937	88.4787	13.3411	0.918656	NA	NA	NA	NA	2.33098	0.742444	0.845102	0.592859	0.418403	NA	NA	3.9265	27.9093	41.6827	11.7167	9.52036	NA	1.78723	1.41496	0.116962	0.103538	1.30618	0.505631	3.9265	34.796
C16	11	f	3.21	31.1268	3.56196	4.87642	7.58656	9.64702	56.016	133.335	176.036	73.9842	74.06	20.0788	21.3623	0.0147843	0	13.1884	8.61679	56.016	154.685	74.0221	20.7206	0.00739215	NA	NA	NA	NA	3.20028	0.36622	0.501365	0.780004	0.991849	NA	NA	5.75923	13.7087	18.0989	7.60662	7.61441	NA	2.06438	2.19635	0.00152003	0	1.35595	0.885926	5.75923	15.9038
C17	15	f	1.91667	11.2119	2.88329	6.14059	4.29449	1.90235	38.97	118.191	176.664	61.854	56.2811	10.1677	10.183	0	0	6.74525	3.09842	38.97	147.427	59.0676	10.1754	0	NA	NA	NA	NA	1.93058	0.496477	1.05735	0.739472	0.327568	NA	NA	6.71028	20.3513	30.4199	10.6507	9.6911	NA	1.75078	1.75342	0	0	1.16147	0.53352	6.71028	25.3856
C18	15	f	3.3	13.765	3.01411	6.35297	2.83713	1.68486	19.0268	214.469	301.672	57.2033	72.4607	11.3159	19.5166	0.110814	0	7.71069	2.26099	19.0268	258.07	64.832	15.4162	0.0554069	NA	NA	NA	NA	1.37664	0.301441	0.635361	0.283742	0.168502	NA	NA	1.90287	21.4491	30.1702	5.7209	7.2468	NA	1.1317	1.95185	0.0110825	0	0.771146	0.226122	1.90287	25.8096
C2	10	f	7.09999	39.6183	11.1678	13.0398	14.9411	12.3607	173.838	318.868	733.471	222.486	120.133	25.2553	44.219	0.149064	NA	21.2753	13.6509	173.838	526.17	171.31	34.7372	0.149064	NA	NA	NA	NA	1.8416	0.519117	0.606135	0.694515	0.574569	NA	NA	8.08062	14.8221	34.0944	10.342	5.58422	NA	1.17396	2.05546	0.00692905	NA	0.988951	0.634542	8.08062	24.4582
C20	11	f	5.22499	23.8778	0	5.62616	16.5999	24.0796	56.3429	144.053	204.773	207.436	67.305	59.1483	70.1504	0.112234	0	9.83466	20.3397	56.3429	174.413	137.371	64.6494	0.056117	NA	NA	NA	NA	1.50823	0	0.355372	1.04852	1.52097	NA	NA	3.55886	9.09897	12.9344	13.1026	4.25127	NA	3.73606	4.431	0.00708918	0	0.621199	1.28474	3.55886	11.0167
C21	13	f	6	36.6341	0.0516008	6.97054	0	5.62209	23.9348	492.132	580.486	213.937	185.762	34.1108	1.9655	6.13323	0	14.5521	2.81104	23.9348	536.309	199.849	18.0381	3.06661	NA	NA	NA	NA	2.01508	0.00283833	0.383418	0	0.309246	NA	NA	1.31655	27.07	31.9299	11.7677	10.2179	NA	1.87628	0.108113	0.337361	0	0.800444	0.154623	1.31655	29.5
C5	18	m	4.14474	36.8144	22.1089	12.8696	19.197	7.56507	83.9323	281.432	384.882	174.156	111.835	41.0417	73.1744	6.42563	3.52684	23.931	13.3811	83.9323	333.157	142.995	57.1081	4.97624	NA	NA	NA	NA	2.93142	1.76046	1.02477	1.5286	0.602383	NA	NA	6.68327	22.4096	30.647	13.8675	8.90507	NA	3.26803	5.82666	0.511653	0.280832	1.90555	1.06549	6.68327	26.5283
C6	11	f	5.25	25.6071	2.57403	14.3019	0.0646975	0	26.3769	476.478	612.241	171.234	139.611	14.4804	3.71408	0.0546743	0	14.161	0.0323488	26.3769	544.36	155.422	9.09722	0.0273372	NA	NA	NA	NA	1.60975	0.161812	0.899065	0.00406711	0	NA	NA	1.65814	29.953	38.4876	10.7644	8.77642	NA	0.910286	0.23348	0.00343702	0	0.89021	0.00203355	1.65814	34.2203
C7	10	m	6.27778	54.8888	4.05444	0	22.339	3.78322	39.9607	211.004	323.893	134.612	214.769	25.4647	46.937	0	0	19.6477	13.0611	39.9607	267.448	174.69	36.2009	0	NA	NA	NA	NA	2.88559	0.213148	0	1.1744	0.19889	NA	NA	2.1008	11.0928	17.0276	7.07675	11.2908	NA	1.33872	2.46755	0	0	1.03291	0.686643	2.1008	14.0602
C8	11	m	9.72	12.9799	21.3509	7.15502	5.73922	6.05066	151.048	412.166	495.521	354.757	202.107	36.7525	30.8826	16.5847	NA	13.8286	5.89494	151.048	453.844	278.432	33.8175	16.5847	NA	NA	NA	NA	0.44072	0.724949	0.242941	0.19487	0.205444	NA	NA	5.12869	13.9947	16.8249	12.0454	6.86233	NA	1.24789	1.04859	0.563118	NA	0.469537	0.200157	5.12869	15.4098
C9	16	f	3.55001	13.1294	0	0	0	0	96.1179	111.024	148.412	190.009	106.064	11.9684	0	0	NA	4.37647	0	96.1179	129.718	148.037	5.98419	0	NA	NA	NA	NA	1.2206	0	0	0	0	NA	NA	8.93578	10.3215	13.7974	17.6646	9.86046	NA	1.11266	0	0	NA	0.406867	0	8.93578	12.0594
CON 808	55	m	3.99	52.6839	23.3286	15.0524	73.4714	49.5221	38.5419	34.8756	40.6628	328.77	378.584	125.227	85.8917	379.648	36.4967	24.2004	48.3257	1.33637	30.355	61.4968	38.0268	353.677	105.559	379.648	30.3486	24.831	4.00121	1.77174	1.14319	5.57996	3.76108	2.92716	2.64871	3.08824	24.9692	28.7525	9.51069	6.52326	28.8333	2.77183	1.83796	3.67021	0.101494	2.30538	4.67052	2.88803	26.8608
CON 809	50	m	6.09	17.0972	0.394329	5.18527	8.7169	9.69651	58.3862	83.0681	46.2	763.374	1178.02	47.1128	36.7383	882.096	36.96	32.5163	3.55228	0	7.55894	9.2067	62.5514	970.697	41.9255	882.096	34.7382	1.77614	0.850735	0.0196213	0.258012	0.433741	0.482485	2.90522	4.13336	2.29885	37.9845	58.6167	2.34427	1.82805	43.8919	1.83908	1.61797	0.176757	0	0.376123	0.458113	3.11248	48.3006
CON 810	28	m	4.605	24.6821	13.8473	8.92915	29.5777	37.6947	59.4693	41.7755	NA	91.0098	189.223	94.1153	65.5797	223.954	34.2502	26.0772	51.8196	20.8422	15.8195	33.6362	50.6224	140.116	79.8475	223.954	30.1637	36.3309	1.6242	0.911215	0.58758	1.94635	2.48048	3.91335	2.74902	NA	5.98886	12.4517	6.19322	4.31545	14.7372	2.25382	1.716	3.40997	1.37151	1.041	2.21342	3.33119	9.2203
CON 811	27	m	2.445	13.2879	1.16935	7.75424	11.6985	3.7035	2.15045	4.38903	26.6928	160.915	161.268	42.4113	41.5523	222.744	51.1502	10.2906	1.50317	28.4558	7.40382	7.70099	11.0774	161.091	41.9818	222.744	30.7204	14.9795	1.64688	0.144928	0.961051	1.44989	0.459007	0.266525	0.543971	3.30827	19.9436	19.9873	5.25641	5.14994	27.6066	6.33949	1.27541	0.186301	3.52678	0.91762	0.954451	1.37292	19.9654
CON 812	22	m	2.385	16.6381	4.42949	0.041182	17.2	6.54451	8.81427	12.982	NA	57.8009	90.6918	41.1022	20.3653	116.901	7.55022	10.0365	2.86344	2.01333	7.03626	11.8723	10.8981	74.2464	30.7337	116.901	8.79337	2.43839	2.11399	0.562796	0.00523245	2.18538	0.831524	1.11991	1.64945	NA	7.344	11.523	5.22231	2.58755	14.8531	0.959306	1.27521	0.36382	0.255808	0.894005	1.50845	1.38468	9.4335
CON 814	30	m	2.895	14.0989	1.01958	7.07667	51.2393	23.7772	21.6191	21.5763	NA	230.802	246.764	91.6132	45.4399	234.08	12.9067	21.5608	75.034	3.62391	7.3984	37.5082	21.5977	238.783	68.5266	234.08	17.2338	39.329	1.47579	0.106724	0.740741	5.36341	2.48885	2.26295	2.25847	NA	24.1589	25.8296	9.58949	4.75636	24.5021	1.35099	2.25685	7.85409	0.379328	0.774417	3.92613	2.26071	24.9943
CON 816	32	m	9.33	45.8523	6.68418	5.05082	22.5748	8.52038	77.4141	101.368	64.881	724.181	795.005	107.408	82.153	828.647	27.4333	22.4927	2.86391	3.98357	19.1958	15.5476	81.2209	759.593	94.7807	828.647	24.963	3.42374	1.48924	0.217096	0.164046	0.733209	0.276735	2.51434	3.29233	2.10728	23.5208	25.8211	3.48853	2.66826	26.9137	0.89101	0.730544	0.0930173	0.129383	0.623462	0.504972	2.63798	24.6709
CON 817	67	m	4.365	26.2534	0	7.4752	5.5039	4.52522	13.2034	8.55604	NA	146.085	152.133	93.375	39.0757	215.068	10.0708	8.00111	4.42727	5.06816	11.2429	5.01456	10.8797	149.109	66.2254	215.068	9.03597	4.74772	1.82258	0	0.518949	0.382096	0.314153	0.916613	0.593984	NA	10.1416	10.5615	6.48235	2.71274	14.9306	0.699144	0.555459	0.307354	0.351846	0.78051	0.348125	0.755298	10.3516
CON 818	35	m	4.23	16.0164	1.60633	4.72825	12.8661	8.22344	40.1515	9.99054	NA	128.396	142.439	82.0495	72.0953	209.955	18.3896	22.9745	3.33802	10.6056	7.45032	10.5448	25.071	135.417	77.0724	209.955	20.6821	6.97181	1.14739	0.115075	0.338724	0.921706	0.589114	2.87639	0.715706	NA	9.19809	10.2041	5.87789	5.16479	15.0408	1.3174	1.64586	0.23913	0.759767	0.533729	0.75541	1.79605	9.70109
CON 819	29	m	3.585	60.0527	0.290248	10.7023	55.0405	25.117	18.1683	23.1867	NA	135.157	193.527	63.2444	75.8542	264.436	17.4447	19.3178	36.0484	5.26172	23.6818	40.0787	20.6775	164.342	69.5493	264.436	18.3812	20.6551	5.07609	0.0245339	0.904639	4.65242	2.12307	1.53572	1.95991	NA	11.4245	16.3583	5.34588	6.41175	22.3521	1.47455	1.63288	3.04708	0.444759	2.00176	3.38775	1.74781	13.8914
CON 820	49	m	4.725	39.0019	1.39664	5.68687	9.0491	1.72773	15.5397	13.2615	8.61464	199.831	334.366	167.145	65.6627	276.312	17.1833	23.0675	3.55618	3.9802	15.3618	5.38841	12.472	267.098	116.404	276.312	20.1254	3.76819	2.50132	0.0895713	0.364718	0.580349	0.110805	0.996616	0.850506	0.552486	12.8158	21.444	10.7196	4.21117	17.7208	1.10203	1.4794	0.22807	0.255264	0.985204	0.345577	0.799869	17.1299
CON258-1	28	m	12.345	244.76	59.0802	102.031	141.501	66.0659	149.468	97.7647	NA	465.703	702.823	543.493	303.122	818.759	365.589	208.621	69.5762	160.165	135.29	103.783	123.616	584.263	423.308	818.759	287.105	114.871	6.00807	1.45023	2.50453	3.47339	1.62171	3.66895	2.39981	NA	11.4315	17.2521	13.341	7.44067	20.0979	8.97405	5.12097	1.70787	3.93154	3.32094	2.54755	3.03438	14.3418
CON388-2	19	f	5.94783	36.7393	5.78553	7.80897	17.4769	0	139.266	62.8287	204.504	337.386	483.294	179.626	89.6195	436.652	16.203	47.8458	2.07745	0	16.7779	10.4107	135.533	410.34	134.623	436.652	27.4956	4.58446	2.03859	0.321027	0.433304	0.969759	0	7.72759	3.48624	11.3475	18.7209	26.817	9.96707	4.9728	24.229	0.899072	2.65487	0.115274	0	0.930975	0.577669	7.52045	22.769
CON392	18	f	3.1125	36.8039	11.6358	7.68056	12.0831	11.4331	28.2557	19.5619	NA	140.814	163.302	78.7917	66.1942	267.605	212.362	49.6495	3.99424	214.402	18.7067	11.7581	23.9088	152.058	72.4929	267.605	131.006	109.198	3.58319	1.13285	0.747773	1.1764	1.11311	2.75095	1.90453	NA	13.7095	15.899	7.6711	6.44461	26.0538	20.6754	4.83384	0.388876	20.874	1.82127	1.14476	2.32774	14.8042
CON397-1	27	f	2.16	NA	7.34059	7.7801	7.46598	0	NA	NA	15.5121	254.039	149.906	101.503	97.3336	NA	17.4818	27.755	0	0	7.56034	3.73299	15.5121	201.972	99.4183	NA	22.6184	0	NA	1.12159	1.18874	1.14075	0	NA	NA	2.37015	38.8154	22.9046	15.509	14.8719	NA	2.6711	4.24077	0	0	1.15517	0.570375	2.37015	30.86
CON413-2	43	m	4.66667	NA	4.11897	4.41655	1.22866	1.85682	NA	NA	59.8246	525.077	220.439	123.618	42.9587	NA	14.2736	15.9787	0	0	4.26776	1.54274	59.8246	372.758	83.2884	NA	15.1261	0	NA	0.291299	0.312344	0.0868926	0.131317	NA	NA	4.23088	37.1342	15.5897	8.74243	3.0381	NA	1.00945	1.13004	0	0	0.301822	0.109105	4.23088	26.3619
CON418-1	73	m	7.035	NA	1.81362	0.993152	0	0	NA	NA	102.397	659.22	648.136	440.306	176.707	NA	2.8646	12.01	3.48626	0	1.40338	0	102.397	653.678	308.506	NA	7.4373	1.74313	NA	0.0850822	0.0465918	0	0	NA	NA	4.80377	30.926	30.406	20.6561	8.28984	NA	0.134387	0.563425	0.163551	0	0.065837	0	4.80377	30.666
CON421-1	43	m	18.3	NA	67.1485	38.6624	9.78994	1.52175	NA	NA	30.834	1021.88	598.519	577.683	565.255	NA	61.0146	140.979	5.98358	4.03351	52.9055	5.65584	30.834	810.2	571.469	NA	100.997	5.00855	NA	1.211	0.697261	0.176557	0.0274441	NA	NA	0.556079	18.4292	10.794	10.4183	10.1941	NA	1.10037	2.54251	0.107911	0.0727427	0.954129	0.102001	0.556079	14.6116
CON422-2	29	f	3.255	NA	4.86328	2.64696	8.77151	1.82342	NA	NA	43.0998	417.008	277.133	84.8159	99.2202	NA	5.15552	7.38749	5.81538	0	3.75512	5.29747	43.0998	347.07	92.018	NA	6.2715	2.90769	NA	0.493101	0.268382	0.889366	0.184882	NA	NA	4.37001	42.2815	28.0992	8.5997	10.0602	NA	0.522732	0.749037	0.589637	0	0.380741	0.537124	4.37001	35.1904
CON427-1	31	f	2.295	NA	2.63563	0.0184781	3.86862	0.760268	NA	NA	1.96206	254.844	151.315	50.9584	31.6084	NA	3.01222	9.29545	1.18164	0	1.32705	2.31445	1.96206	203.08	41.2834	NA	6.15383	0.590821	NA	0.379018	0.00265724	0.556328	0.109331	NA	NA	0.282154	36.6479	21.7599	7.32808	4.54545	NA	0.433173	1.33673	0.169926	0	0.190837	0.332829	0.282154	29.2039
CON430-2	32	m	3.44516	NA	4.62407	3.4147	0	3.01909	NA	NA	35.642	449.872	243.219	253.62	86.9529	NA	22.5984	36.5455	0.142841	7.25279	4.01939	1.50955	35.642	346.546	170.286	NA	29.572	3.69782	NA	0.442968	0.327115	0	0.289217	NA	NA	3.41437	43.096	23.2995	24.2958	8.32974	NA	2.16484	3.50092	0.0136836	0.694789	0.385042	0.144609	3.41437	33.1977
CON533-1	61	f	7.08	33.0464	0	0	0	0.0544781	27.4033	24.4832	276.757	228.276	259.505	265.728	105.236	360.254	24.2839	19.2192	0.0301463	0	11.0155	7.95639	109.548	243.891	185.482	360.254	23.8362	0.890524	1.54045	0	0	0	0.00253949	1.2774	1.14128	12.901	10.6411	12.0968	12.3868	4.90558	16.7932	1.13199	0.895898	0.00140526	0	0.513483	0.370886	5.10655	11.3689
CON535-2	30	m	9.14118	34.5886	0	0.0891951	29.5823	0	120.08	24.7955	51.0222	611.876	404.347	283.967	101.051	810.965	0	43.886	0.26988	0	11.5593	7.39558	65.2991	508.111	192.509	810.965	19.6937	0.06747	1.24879	0	0.0032203	1.06804	0	4.33536	0.895216	1.84211	22.0912	14.5985	10.2523	3.64835	29.2791	0	1.58446	0.00974374	0	0.417335	0.26701	2.35756	18.3448
CON541-1	20	m	4.575	82.2063	8.11875	15.2532	0.0453296	7.46717	54.7663	31.1654	58.3548	125.794	419.081	115.162	59.878	274.717	35.4956	17.0283	0	0	35.1928	10.4549	48.0955	272.437	87.5199	274.717	26.3093	0.010991	5.93023	0.585674	1.10034	0.00327	0.538669	3.95075	2.24822	4.20962	9.07454	30.2318	8.30758	4.3195	19.8176	2.56059	1.2284	0	0	2.53875	0.7542	3.46953	19.6532
CON544-2	33	m	7.47273	135.033	8.05778	46.6629	0.352054	19.3711	58.4591	17.3793	149.797	297.939	122.155	205.378	72.9829	410.023	33.8636	99.8419	0.708607	0.449878	63.2512	14.87	75.2117	210.047	139.18	410.023	54.4867	0.289621	5.96373	0.355872	2.06087	0.0155485	0.855526	2.58184	0.767555	6.61578	13.1585	5.39499	9.0705	3.22329	18.1087	1.49558	4.40952	0.0312956	0.0198689	2.79349	0.656732	3.32173	9.27673
CON553-1	59	f	16.4286	84.925	6.47596	13.6806	45.7908	13.8325	133.973	154.135	95.728	1082.63	1384.97	834.942	265.888	1590.94	12.4126	25.4475	0.642926	0	35.0272	20.7361	127.945	1233.8	550.415	1590.94	36.9669	4.43018	1.70606	0.130095	0.274829	0.919889	0.277881	2.69137	3.09641	1.92308	21.7489	27.8226	16.7731	5.34141	31.9604	0.249357	0.511215	0.0129157	0	0.70366	0.416567	2.57029	24.7858
CON561-1	33	m	7.65	48.9487	4.4934	13.053	7.87153	3.75394	45.9542	27.7382	1.72659	244.025	315.64	268.778	72.6508	395.275	35.0876	50.7921	0.0381029	0	22.165	8.9432	25.1397	279.832	170.714	395.275	46.8109	1.53653	2.11172	0.193852	0.563126	0.33959	0.161951	1.98254	1.19667	0.0744879	10.5276	13.6172	11.5955	3.13427	17.0528	1.51373	2.19125	0.00164382	0	0.956234	0.385824	1.08456	12.0724
CON563-2	56	m	11.8364	33.6936	7.98773	12.9817	7.22701	1.12441	37.9638	57.986	NA	321.578	353.71	230.602	103.111	408.205	50.9162	56.4243	0	0.160332	18.221	4.17571	47.9749	337.644	166.856	408.205	53.6703	0.0801658	0.862612	0.204499	0.332354	0.185023	0.0287866	0.971936	1.48454	NA	8.23292	9.05556	5.90378	2.63981	10.4507	1.30354	1.44455	0	0.00410475	0.466488	0.106905	1.22824	8.64424
CON568-1	58	f	9.075	35.8053	3.68497	2.28468	0	0.984934	112.198	39.5248	15.2386	545.488	739.825	310.367	110.037	664.779	13.8639	16.4639	2.69167	4.60728	13.925	3.13025	55.6537	642.657	210.202	664.779	14.3209	3.76908	1.30214	0.134012	0.0830877	0	0.0358194	4.08032	1.43741	0.554187	19.8379	26.9054	11.2872	4.00176	24.1762	0.504192	0.598747	0.0978886	0.167554	0.506414	0.113838	2.02397	23.3717
CON572-2	73	m	7.86	42.5045	0	43.7973	22.5681	10.7591	47.7156	39.7379	NA	882.898	789.023	317.305	145.76	872.761	71.0247	133.504	0	0.46752	28.7673	16.6636	43.7268	835.961	231.532	872.761	102.265	0.23376	1.6387	0	1.68854	0.870078	0.4148	1.8396	1.53203	NA	34.0388	30.4196	12.2332	5.61955	33.648	2.73825	5.14706	0	0.0180245	1.10908	0.642439	1.68582	32.2292
CON580-1	30	f	8.565	59.1714	9.49535	3.89905	18.6589	24.9434	99.1678	88.29	10.0825	837.808	1067.98	312.107	122.615	836.431	49.442	40.468	1.77695	0.0621868	24.1886	21.8012	65.8468	952.893	217.361	836.431	44.955	0.91957	2.09349	0.335946	0.137949	0.660154	0.882499	3.50856	3.12371	0.356718	29.6417	37.7852	11.0424	4.33813	29.593	1.74926	1.43176	0.0628687	0.00220017	0.855795	0.771327	2.32966	33.7134
CON586-2	28	f	6.744	84.8887	18.9712	18.7093	11.5904	16.8686	103.318	111.841	84.2381	443.502	1005.15	179.456	54.9405	663.941	25.5055	52.552	0.0158867	0	40.8564	13.763	99.799	724.325	117.198	663.941	37.2791	1.30716	4.15422	0.928401	0.915581	0.567201	0.825501	5.05611	5.47318	4.12238	21.7038	49.1892	8.78208	2.68864	32.4914	1.24817	2.57175	0.000777454	0	1.9994	0.673522	4.88389	35.4465
CON591-1	28	m	3.585	27.9336	7.75872	14.5168	8.87775	11.5595	46.7404	22.0229	NA	149.282	327.726	104.667	41.3832	251.476	59.6191	29.7318	8.36497	33.0942	16.7364	10.2186	34.3817	238.504	73.0251	251.476	44.6754	20.7296	2.36115	0.655824	1.22706	0.750412	0.977089	3.95084	1.86154	NA	12.6184	27.7018	8.84722	3.49801	21.2565	5.03944	2.51314	0.707068	2.79736	1.41468	0.863751	2.90619	20.1601
CON601-1	37	f	9.12	52.901	21.7726	14.9026	27.0365	17.3372	84.7058	56.2948	60.1104	499.965	495.392	301.908	106.537	619.087	54.6777	41.7361	4.86599	3.68415	29.8588	34.2425	67.037	497.679	204.222	619.087	40.3645	2.13754	1.91437	0.787905	0.539294	0.978392	0.627397	3.06532	2.03719	2.17526	18.0927	17.9272	10.9254	3.85534	22.4034	1.97867	1.51034	0.17609	0.133321	1.08052	1.23916	2.42592	18.0099
CON602-2	26	f	5.34706	55.9349	5.89792	23.3582	10.2817	2.32169	26.0183	19.5801	52.7613	129.322	531.65	92.07	53.939	369.062	17.2512	44.4309	0.224893	0.0660252	28.397	5.3038	32.7866	330.486	73.0045	369.062	21.7398	4.74775	3.45243	0.364033	1.44173	0.634613	0.1433	1.60591	1.20853	3.25655	7.98208	32.8147	5.68278	3.32924	22.7794	1.06478	2.74238	0.0138809	0.00407523	1.75273	0.327363	2.02366	20.3984
CON611-1	22	f	5.55	35.0678	5.12351	5.01901	14.0846	6.8793	53.9462	20.4575	4.95436	291.858	303.443	191.249	64.6676	324.558	24.3712	45.284	1.5293	0	15.0701	11.5944	26.4527	297.651	127.958	324.558	36.9867	1.51491	2.08532	0.304672	0.298457	0.837549	0.40908	3.20793	1.21652	0.294613	17.3555	18.0444	11.3727	3.84548	19.3	1.44925	2.69283	0.0909403	0	0.89615	0.689468	1.57302	17.6999
CON613-2	25	f	6.26	38.4074	0.893864	3.17465	20.7572	6.40687	43.8934	49.6033	35.8475	478.126	410.994	269.461	78.967	577.119	17.8363	68.7133	10.4918	2.66687	14.1586	10.6834	43.1147	444.56	174.214	577.119	30.5213	6.65371	2.02487	0.0471254	0.167371	1.09434	0.337776	2.3141	2.61513	1.88991	25.2073	21.668	14.2062	4.16321	30.4262	0.940344	3.62263	0.553135	0.1406	0.746456	0.563241	2.27305	23.4376
CON625-1	45	m	2.715	16.9	33.4438	9.65381	0.0328729	4.42476	5.13868	16.0906	13.0994	152.925	200.625	83.8598	29.359	262.882	23.7644	10.5649	0	0.0306283	19.9992	13.9688	11.4429	176.775	56.6094	262.882	20.5295	0.00765707	2.05435	4.0654	1.17351	0.003996	0.537869	0.624653	1.95596	1.59236	18.5894	24.3879	10.1939	3.56885	31.9557	2.88878	1.28426	0	0.00372315	2.43109	1.69803	1.39099	21.4886
CON626-2	40.5	m	5.61	22.9204	0.419504	0.0143242	0	0	19.8379	12.649	22.8165	422.928	396.46	54.4748	33.953	459.173	0.038732	40.6069	0	14.59	7.78473	2.73217	18.4345	409.694	44.2139	459.173	25.8837	8.86909	1.34839	0.0246792	0.000842687	0	0	1.16705	0.744135	1.34228	24.8806	23.3235	3.20472	1.99744	27.0129	0.00227858	2.38888	0	0.858319	0.457971	0.160732	1.08449	24.1021
CON655	41	f	1.18909	9.47335	0.73621	7.09398	5.10877	1.35683	5.19669	11.2401	NA	53.9331	69.1309	53.4179	16.7296	79.761	7.30896	3.2446	1.02867	1.80195	5.76785	3.2328	8.21838	61.532	35.0738	79.761	5.27678	1.41531	2.41421	0.187617	1.80784	1.30193	0.345777	1.32433	2.86444	NA	13.7444	17.6174	13.6131	4.26341	20.3265	1.86263	0.82686	0.262148	0.459212	1.46989	0.823853	2.09439	15.6809
CON661	62	m	1.86	14.1893	3.17807	1.08405	2.30428	1.12131	36.3098	14.9681	9.1364	116.634	136.998	49.8633	35.5737	153.108	6.68854	9.68056	1.1503	0.0882277	6.15049	1.71279	20.1381	126.816	42.7185	153.108	8.18455	0.619266	2.31172	0.517769	0.176612	0.375412	0.182683	5.91558	2.43859	1.4885	19.0019	22.3196	8.1237	5.79564	24.9442	1.08969	1.57715	0.187407	0.014374	1.00203	0.279047	3.28089	20.6608
CON663	45	f	1.6875	22.5274	2.1388	4.28116	2.74766	0.628669	27.76	33.283	NA	185.576	226.384	85.6237	25.4547	190.128	6.86132	8.32049	0.200286	0	9.64912	1.68817	30.5215	205.98	55.5392	190.128	7.5909	0.100143	4.04533	0.384071	0.768783	0.493407	0.112892	4.98495	5.97674	NA	33.3245	40.6525	15.3757	4.57099	34.142	1.23211	1.49414	0.035966	0	1.73273	0.30315	5.48085	36.9885
CON667	18.5	f	8.83636	81.5047	11.698	40.1645	35.6142	10.1842	104.888	63.5972	NA	534.661	991.496	329.378	126.36	762.122	112.053	94.7655	7.00286	75.6993	44.4557	22.8992	84.2424	763.078	227.869	762.122	103.409	41.3511	2.79508	0.401167	1.37738	1.22134	0.349253	3.59697	2.18097	NA	18.3354	34.0019	11.2956	4.33333	26.1359	3.84269	3.24984	0.240153	2.596	1.52455	0.785295	2.88897	26.1687
CON671	60	m	3.3975	32.6289	12.4864	8.85663	8.42497	10.0285	37.1631	46.2149	NA	268.528	462.444	167.098	67.7521	405.233	30.7284	27.336	10.2814	9.46619	17.9906	9.22671	41.689	365.486	117.425	405.233	29.0322	9.87379	2.91024	1.11369	0.789942	0.751441	0.894459	3.31466	4.122	NA	23.9506	41.2464	14.9038	6.04295	36.1436	2.74073	2.43816	0.917019	0.84431	1.60462	0.82295	3.71833	32.5985
CON679	25	f	5.19	44.6893	0	18.3908	18.7517	11.219	29.6411	46.7391	NA	441.721	340.408	130.109	89.5807	515.528	35.9971	10.0369	9.05629	30.3084	21.0267	14.9854	38.1901	391.065	109.845	515.528	23.017	19.6823	2.60929	0	1.07379	1.09486	0.655048	1.73067	2.72897	NA	25.7909	19.8755	7.59671	5.23038	30.1003	2.10177	0.586031	0.528773	1.76962	1.22769	0.874955	2.22982	22.8332
CON691	30	f	6.76364	262.505	44.7442	105.895	38.3927	9.27473	161.988	124.368	NA	492.398	532.022	241.632	353.109	900.981	181.321	113.905	7.02527	82.2672	137.715	23.8337	143.178	512.21	297.371	900.981	147.613	44.6462	11.761	2.00467	4.74441	1.7201	0.415534	7.25752	5.57204	NA	22.0608	23.8361	10.8258	15.8203	40.3665	8.12369	5.10329	0.314752	3.68581	6.17002	1.06782	6.41478	22.9485
CON695	44	f	2.2875	16.0389	8.80123	4.05343	11.817	5.38288	24.9536	22.9243	15.0156	180.675	251.514	124.163	61.7204	204.92	11.1902	26.6218	1.71811	4.36305	9.63118	8.59992	20.9645	216.094	92.9417	204.92	18.906	3.04058	2.12471	1.16592	0.536967	1.56542	0.713082	3.30566	3.03683	1.98915	23.9344	33.3187	16.4481	8.17624	27.1462	1.48239	3.52666	0.227601	0.577982	1.27586	1.13925	2.77721	28.6265
CON696	48	f	3.2175	33.2806	1.8644	6.29108	11.7439	0.376057	49.1594	37.3816	NA	224.495	316.842	134.649	50.4181	341.198	25.3123	21.8427	1.2736	3.93423	13.812	6.05997	43.2705	270.668	92.5336	341.198	23.5775	2.60391	3.13443	0.175593	0.592506	1.10606	0.0354177	4.62993	3.52067	NA	21.1433	29.8408	12.6815	4.74847	32.1347	2.38396	2.05719	0.11995	0.370533	1.30084	0.57074	4.0753	25.4921
CON708	33	f	3.7575	23.08	7.61099	7.4248	13.1269	9.3444	100.478	72.0396	NA	258.063	333.327	100.085	37.0958	312.96	101.428	40.7306	5.60376	135.921	12.7053	11.2356	86.2587	295.695	68.5904	312.96	71.0792	70.7622	1.86133	0.613802	0.598786	1.05864	0.753596	8.10322	5.80976	NA	20.8119	26.8817	8.07154	2.99166	25.2392	8.17983	3.28479	0.451925	10.9616	1.02464	0.906118	6.95649	23.8468
CON713	57	f	2.3925	28.766	5.92548	8.44519	7.86379	6.38886	60.4182	21.8799	NA	120.353	224.152	94.4254	25.6332	176.037	16.2338	24.0127	1.42508	1.0224	14.3789	7.12633	41.149	172.252	60.0293	176.037	20.1232	1.22374	3.64346	0.750512	1.06966	0.996016	0.809203	7.65247	2.77127	NA	15.2437	28.3907	11.9598	3.24666	22.2965	2.05615	3.04141	0.180498	0.129495	1.82121	0.90261	5.21187	21.8172
CON722	46	f	6.15	18.7926	9.85878	9.15896	24.4378	12.1026	37.6502	29.6173	NA	345.674	503.387	204.772	87.2623	499.29	404.808	133.267	16.0511	263.137	12.6034	18.2702	33.6338	424.53	146.017	499.29	269.038	139.594	0.92597	0.485774	0.451291	1.20413	0.596332	1.85515	1.45934	NA	17.0325	24.8035	10.0898	4.2997	24.6016	19.9462	6.56649	0.79089	12.9656	0.621012	0.90023	1.65724	20.918
CON727	23	f	3.7275	26.6487	7.36053	3.32711	12.9429	5.83067	7.15322	23.216	NA	208.909	190.835	90.7451	43.8188	271.199	104.468	40.3087	2.05964	87.7637	12.4455	9.38678	15.1846	199.872	67.282	271.199	72.3884	44.9117	2.16643	0.598381	0.27048	1.0522	0.474009	0.581527	1.88736	NA	16.9834	15.5141	7.3772	3.56229	22.0474	8.49283	3.27693	0.16744	7.13483	1.01176	0.763107	1.23445	16.2488
CON734	30	f	5.1	27.0868	5.57592	11.4972	17.0802	7.34011	38.8038	35.4984	NA	241.583	279.496	132.334	55.0941	336.239	252.638	53.0436	11.2755	198.587	14.72	12.2102	37.1511	260.539	93.7141	336.239	152.841	104.931	1.60944	0.331309	0.683137	1.01487	0.436133	2.30563	2.10923	NA	14.3543	16.607	7.86299	3.27357	19.9785	15.0112	3.15173	0.669963	11.7996	0.874628	0.7255	2.20743	15.4807
CON741	45	f	2.49	2.76224	1.38333	4.89076	6.06052	6.35782	13.3619	22.1204	1.26221	218.69	592.395	43.8439	38.6934	312.633	89.6901	16.2291	1.53263	80.3885	3.01211	6.20917	12.2482	405.542	41.2687	312.633	52.9596	40.9605	0.336162	0.16835	0.595201	0.737559	0.773739	1.62613	2.69203	0.15361	26.6143	72.0938	5.33576	4.70895	38.047	10.9152	1.97506	0.18652	9.78319	0.366571	0.755649	1.49059	49.3541
CON751	20	m	2.43	22.6528	4.5185	6.11961	10.0315	4.07953	16.3176	19.5604	NA	173.551	244.799	55.4576	36.2472	231.052	42.2835	49.7157	5.61627	11.0498	11.097	7.05549	17.939	209.175	45.8524	231.052	45.9996	8.33304	2.82489	0.563474	0.763138	1.25096	0.508733	2.03487	2.43925	NA	21.6424	30.5273	6.91577	4.52016	28.813	5.27291	6.19974	0.70037	1.37795	1.38383	0.879847	2.23706	26.0849
CON755	46	f	4.125	13.6052	7.51242	3.44996	11.3512	4.04636	66.9477	58.0329	NA	247.183	421.908	85.1396	20.2734	300.563	9.15312	5.84277	4.31084	0	8.1892	7.69876	62.4903	334.545	52.7065	300.563	7.49794	2.15542	0.999466	0.551876	0.25344	0.833878	0.297253	4.91811	4.26321	NA	18.1585	30.9942	6.25452	1.48932	22.08	0.672406	0.429221	0.316683	0	0.601594	0.565566	4.59066	24.5763
CON761	20	m	0.93	12.0389	0.136826	2.86944	2.21583	2.80875	3.13427	5.24078	NA	57.2157	86.2227	35.2392	10.7769	94.3503	17.0719	13.1689	0.544182	12.5592	5.01504	2.51229	4.18753	71.7192	23.0081	94.3503	15.1204	6.55169	3.92273	0.0445831	0.934975	0.722003	0.915199	1.02127	1.70765	NA	18.6431	28.0947	11.4823	3.51153	30.743	5.56269	4.29095	0.177316	4.09228	1.6341	0.818601	1.36446	23.3689
CON766	40	f	1.6575	7.90365	0	1.05172	5.61391	1.86418	4.20262	8.25528	NA	78.3387	83.9064	51.5959	20.3556	114.7	10.8704	4.50874	1.94727	1.54289	2.98512	3.73904	6.22895	81.1226	35.9757	114.7	7.68957	1.74508	1.44497	0	0.19228	1.02636	0.340817	0.768339	1.50926	NA	14.3222	15.3401	9.43295	3.72149	20.9699	1.98737	0.824305	0.356007	0.282078	0.545751	0.683586	1.1388	14.8311
HIC011	5	f	4.35	51.8733	18.6246	13.0971	25.6635	11.5549	20.5845	0	NA	334.716	531.784	85.5805	28.5464	532.508	23.6127	11.5417	0	0	27.865	18.6092	10.2923	433.25	57.0635	532.508	17.5772	0	3.61361	1.29743	0.912373	1.78777	0.804937	1.43396	0	NA	23.317	37.0452	5.96172	1.9886	37.0956	1.64491	0.80402	0	0	1.94114	1.29636	0.716981	30.1811
HIC018	10	m	6.18947	116.711	0	10.8489	9.00959	11.341	0	0.362858	NA	167.918	825.745	120.093	97.0599	381.946	43.2943	22.7764	0	0	42.52	10.1753	0.181429	496.831	108.576	381.946	33.0353	0	5.71406	0	0.531149	0.4411	0.555243	0	0.0177651	NA	8.22107	40.4276	5.87961	4.75195	18.6997	2.11965	1.11511	0	0	2.08174	0.498171	0.00888257	24.3244
HIC019	7	m	7.75	62.612	0	8.88583	34.723	35.8925	49.7347	57.8681	20.7773	281.686	528.808	197.591	152.66	346.167	39.4523	31.8245	0	0	23.8326	35.3077	42.7934	405.247	175.125	346.167	35.6384	0	2.44817	0	0.347442	1.35769	1.40342	1.94466	2.26268	0.812408	11.0141	20.6768	7.72595	5.96911	13.5354	1.54261	1.24436	0	0	0.931872	1.38056	1.67325	15.8454
HIC023	6	m	17.1923	67.0984	29.7601	77.6272	64.1624	31.4754	34.5484	173.675	80.761	1732.58	2227.96	720.032	235.983	2161.54	72.4801	35.1109	13.2464	9.28083	58.1619	47.8189	96.3283	1980.27	478.008	2161.54	53.7955	11.2636	1.18267	0.524549	1.36825	1.13092	0.554782	0.608947	3.06119	1.42349	30.5383	39.2698	12.6912	4.15942	38.0992	1.27753	0.618863	0.23348	0.163583	1.02516	0.842852	1.69787	34.9041
HIC027	15	m	29.2235	157.555	41.7867	36.6023	56.3321	38.2953	532.478	776.494	562.319	4308.11	4953.68	780.794	410.755	4296.95	169.664	253.414	0	0	78.6478	47.3137	623.763	4630.89	595.775	4296.95	211.539	0	1.63375	0.433302	0.379543	0.58413	0.397099	5.52147	8.05177	5.8309	44.6725	51.3666	8.09637	4.25928	44.5568	1.75931	2.62775	0	0	0.81553	0.490614	6.46805	48.0195
HIC028	6	m	10.1625	127.158	94.4081	83.6258	63.3407	46.5855	42.5128	105.094	4.48946	770.368	589.743	140.75	205.867	929.668	1.79147	73.5744	0.317518	0	101.73	54.9631	50.6987	680.056	173.309	929.668	37.6829	0.158759	3.79164	2.81511	2.49359	1.88872	1.38911	1.26767	3.13374	0.133869	22.9712	17.5853	4.19694	6.13865	27.7213	0.0534188	2.19388	0.0094679	0	3.03345	1.63892	1.51176	20.2782
HIC030	10	m	13.0154	76.6146	11.3131	20.5756	0.0683668	4.7656	204.322	141.882	145.733	1008.28	1646.13	487.285	240.754	1110.2	39.4231	64.7543	0	0	36.1678	2.41698	163.979	1327.21	364.02	1110.2	52.0887	0	1.78378	0.263396	0.479052	0.00159175	0.110955	4.75713	3.30336	3.39303	23.4752	38.3261	11.3452	5.60536	25.8483	0.917867	1.50764	0	0	0.842075	0.0562733	3.81784	30.9006
HIC032	8	f	6.54	34.1582	41.8256	21.1846	29.2268	25.3272	0.0781192	62.919	NA	506.034	285.266	126.723	54.543	539.802	85.178	72.2603	0.0368363	0	32.3895	27.277	31.4986	395.65	90.6328	539.802	78.7191	0.0184181	1.58272	1.93798	0.981587	1.35422	1.17353	0.00361965	2.91535	NA	23.447	13.2178	5.87168	2.52725	25.0117	3.94672	3.34817	0.00170681	0	1.50076	1.26388	1.45948	18.3324
HIC042	8	m	5.35714	11.6971	1.07518	0.0223245	16.3613	4.37015	19.1088	31.7916	249.835	287.544	525.613	65.7796	44.2655	464.856	24.8806	7.88225	12.9256	0	4.26488	10.3657	100.245	406.579	55.0226	464.856	16.3814	6.46282	0.661656	0.060818	0.0012628	0.925486	0.2472	1.0809	1.79831	14.1321	16.2651	29.7317	3.72087	2.50391	26.2949	1.40739	0.445865	0.731147	0	0.241246	0.586343	5.67044	22.9984
HIC050-1	8		10.38	38.9551	5.85247	18.0248	13.9561	3.86285	0	52.5637	0	928.411	1204.94	101.672	50.0993	1234.23	26.6089	8.31897	12.3042	0	20.9441	8.90946	17.5212	1066.68	75.8858	1234.23	17.4639	6.1521	1.13724	0.170855	0.52621	0.407429	0.112771	0	1.53453	0	27.1037	35.1767	2.96819	1.46258	36.0318	0.776812	0.242861	0.359205	0	0.611436	0.2601	0.511509	31.1402
HIC051	12	m	8.12571	47.4721	0	15.9289	20.3659	8.75338	0.112102	16.9409	2.26286	253.42	444.516	221.982	119.027	409.328	36.8644	19.6898	0	0	21.1337	14.5596	6.43861	348.968	170.504	409.328	28.2771	0	1.77037	0	0.594033	0.759499	0.326438	0.0041806	0.631772	0.0843882	9.45074	16.5772	8.27831	4.43883	15.265	1.37477	0.734285	0	0	0.788133	0.542969	0.240114	13.014
HIC052	8	f	10.1707	169.702	77.238	113.361	15.2815	11.1345	0.51636	14.868	NA	559.043	643.34	171.793	28.5543	816.936	100.129	106.41	59.2127	0.557995	120.1	13.208	7.6922	601.192	100.174	816.936	103.269	29.8854	5.05615	2.30126	3.37753	0.455303	0.331744	0.0153846	0.442984	NA	16.6563	19.1679	5.11847	0.850757	24.3401	2.98328	3.17041	1.7642	0.0166251	3.57831	0.393523	0.229184	17.9121
HIC107	15	f	6.18462	72.3558	NA	38.957	46.6924	22.0028	0.825282	28.478	NA	201.076	NA	55.6676	162.966	678.028	59.9129	0	0.545701	0.346742	55.6564	34.3476	14.6516	201.076	109.317	678.028	29.9565	0.446222	3.54525	NA	1.90879	2.28781	1.07808	0.0404367	1.39535	NA	9.85222	NA	2.72757	7.9849	33.2216	2.93558	0	0.026738	0.0169895	2.72702	1.68294	0.717893	9.85222
HIC109	14	f	7.61053	68.6444	5.23006	7.46083	74.17	15.4695	36.1479	72.0831	NA	270.448	408.922	156.055	123.805	473.887	74.8086	52.6689	0.190278	0	27.1118	44.8197	54.1155	339.685	139.93	473.887	63.7387	0.0951388	2.73323	0.208247	0.29707	2.95325	0.615952	1.43931	2.87015	NA	10.7685	16.2822	6.21369	4.92958	18.8689	2.97867	2.09713	0.00757633	0	1.07952	1.7846	2.15473	13.5253
HIC128	8		7.38	207.915	45.5499	55.8449	96.4727	48.8522	4.49955	14.7064	0	327.48	340.563	216.917	248.987	350.21	382.799	236.938	9.40562	24.8539	103.103	72.6624	6.40198	334.022	232.952	350.21	309.868	17.1298	8.53718	1.87032	2.29305	3.96127	2.00592	0.184756	0.60386	0	13.4467	13.9839	8.90684	10.2237	14.38	15.7181	9.7289	0.386204	1.02053	4.23352	2.98359	0.262872	13.7153
HIC132	15	m	9.525	321.322	84.6121	130.637	190.285	36.6126	41.1837	101.225	NA	402.991	248.893	418.463	363.155	320.748	222.685	173.617	89.0074	0	178.857	113.449	71.2044	325.942	390.809	320.748	198.151	44.5037	10.2226	2.69187	4.15611	6.05377	1.1648	1.31023	3.2204	NA	12.8208	7.91833	13.3131	11.5535	10.2043	7.08456	5.5235	2.8317	0	5.69019	3.60928	2.26531	10.3696
HIC135	13	m	9.6	0.911218	78.6383	0	0	64.9398	0	25.9318	83.3684	962.363	665.51	218.529	846.753	1074.83	35.8173	86.2208	0	0	26.5165	32.4699	36.4334	813.936	532.641	1074.83	61.019	0	0.0287632	2.48227	0	0	2.04987	0	0.818554	2.63158	30.3776	21.0073	6.89802	26.7283	33.9277	1.1306	2.72162	0	0	0.837011	1.02493	1.15004	25.6924
HIC137	5	m	7.75385	41.1357	16.0468	32.5647	0	0	36.5772	92.3089	29.0037	643.094	910.615	184.768	163.853	679.391	52.253	60.5689	0	0	29.9157	0	52.63	776.855	174.311	679.391	56.4109	0	1.60764	0.62713	1.27267	0	0	1.42949	3.60755	1.1335	25.133	35.588	7.22098	6.40359	26.5515	2.04211	2.36711	0	0	1.16915	0	2.05685	30.3605
HIC142	16	f	7.97143	70.5625	0	0.055644	10.0792	9.56354	17.5199	21.4843	4.16889	542.804	1508.19	307.833	53.5649	1010.96	50.7486	70.5824	0	0	23.5394	9.82139	14.391	1025.5	180.699	1010.96	60.6655	0	2.6824	0	0.00211528	0.383158	0.363554	0.666012	0.816717	0.158479	20.6345	57.3333	11.7021	2.03625	38.4313	1.92919	2.68316	0	0	0.89484	0.373356	0.547069	38.9839
HIC148	1	f	26.0667	642.913	393.263	323.938	414.711	134.397	163.336	130.961	13.4406	449.879	1331.68	644.222	245.873	1238.43	812.58	617.869	0.13015	13.1616	453.371	274.554	102.579	890.782	445.048	1238.43	715.225	6.64589	7.474	4.57176	3.76585	4.8211	1.56239	1.89881	1.52245	0.15625	5.22994	15.4811	7.48921	2.85833	14.397	9.4464	7.18286	0.00151302	0.153007	5.27053	3.19175	1.1925	10.3555
HIC149	9	m	8.4	63.1943	18.5965	31.4002	43.409	18.0721	186.233	87.4006	125.767	588.181	640.821	110.915	132.104	735.096	96.6823	54.4176	0	0	37.7303	30.7406	133.134	614.501	121.509	735.096	75.5499	0	2.27974	0.670871	1.13276	1.56598	0.651953	6.71837	3.15298	4.53704	21.2187	23.1176	4.00127	4.76564	26.5186	3.48782	1.96312	0	0	1.36112	1.10897	4.8028	22.1681
HIC150	10	f	14.6118	134.471	27.8425	13.2441	18.703	15.4811	148.172	149.758	77.4748	459.431	657.047	630.897	626.258	753.721	114.153	122.105	0.139262	10.4002	58.5191	17.092	125.135	558.239	628.577	753.721	118.129	5.26975	2.78876	0.577421	0.274667	0.387877	0.321058	3.07291	3.10581	1.60673	9.52804	13.6264	13.084	12.9878	15.6313	2.36739	2.53231	0.00288813	0.215688	1.21362	0.354468	2.59515	11.5772
HIC157	14	f	3.74118	53.2624	0	25.0777	3.53994	16.5335	14.0539	28.1471	NA	239.178	79.3947	55.5889	54.3773	221.985	47.3869	22.3067	0.037872	0	26.1133	10.0367	21.1005	159.286	54.9831	221.985	34.8468	0.018936	4.31418	0	2.03126	0.286731	1.33919	1.13834	2.27988	NA	19.3731	6.43087	4.50263	4.40449	17.9805	3.83827	1.80681	0.00306758	0	2.11515	0.812963	1.70911	12.902
HIC158	14	f	4.15714	31.0658	0	0	81.0934	0	20.6213	0	NA	257.432	681.211	62.9975	38.801	347.948	38.6093	60.1432	0	0.175586	10.3553	40.5467	10.3106	469.321	50.8992	347.948	49.3762	0.0877932	2.26451	0	0	5.91121	0	1.50316	0	NA	18.7652	49.6561	4.59213	2.82836	25.3633	2.81438	4.38407	0	0.0127992	0.754835	2.95561	0.751582	34.2107
HIC159	10	f	7.44	54.284	NA	67.5323	38.2367	13.4164	137.446	111.154	NA	578.691	NA	181.452	153.253	914.938	96.2578	69.269	5.61831	11.1397	60.9081	25.8266	124.3	578.691	167.352	914.938	82.7634	8.37903	2.21098	NA	2.75058	1.55738	0.546448	5.59816	4.5273	NA	23.57	NA	7.39051	6.24196	37.2653	3.92057	2.82132	0.228833	0.453721	2.48078	1.05191	5.06273	23.57
HIC164	12	f	4.12	43.6739	0	14.0189	0	0	16.0299	26.7922	NA	149.388	139.31	182.191	82.176	270.855	8.85733	17.4988	12.7808	0	19.2309	0	21.411	144.349	132.183	270.855	13.178	6.3904	3.21226	0	1.0311	0	0	1.17901	1.97059	NA	10.9877	10.2464	13.4003	6.04413	19.9217	0.651466	1.28705	0.940041	0	1.41445	0	1.5748	10.617
HIC169	10	f	4.56	43.2663	15.051	0	13.3471	0.137312	7.44473	28.4189	49.7619	551.777	803.656	112.606	56.0483	767.996	25.2696	10.9512	0.053145	0	19.4391	6.74222	28.5418	677.717	84.3271	767.996	18.1104	0.0265725	2.87522	1.0002	0	0.88697	0.00912492	0.494732	1.88855	3.30688	36.6678	53.4062	7.48311	3.72464	51.0364	1.67927	0.727754	0.0035317	0	1.29181	0.448047	1.89672	45.037
HIC172	14	f	5.61429	46.7411	2.38169	12.5732	8.48779	6.02157	34.7225	37.9601	NA	595	568.076	106.662	50.862	648.339	27.4004	40.1987	0	0	20.5653	7.25468	36.3413	581.538	78.7618	648.339	33.7995	0	2.52285	0.128551	0.678636	0.458127	0.325014	1.87414	2.04889	NA	32.115	30.6618	5.75704	2.74527	34.994	1.47893	2.16972	0	0	1.11001	0.39157	1.96152	31.3884
HIC181	9	f	11.2125	92.3053	35.2894	7.76962	31.965	31.9543	0	52.5454	6.1875	1449.79	1598.97	215.865	177.032	1486.78	36.0203	69.7052	9.32273	0	45.1215	31.9596	19.5776	1524.38	196.448	1486.78	52.8628	4.66137	2.49465	0.953737	0.209983	0.863889	0.863601	0	1.4201	0.167224	39.1821	43.2139	5.834	4.78447	40.1818	0.973489	1.88386	0.251957	0	1.21946	0.863745	0.529108	41.198
HIC182	6	m	5.32	36.6914	23.8368	0	0.471091	35.9793	12.7427	20.9101	7.38889	346.4	286.421	82.5554	65.7125	418.87	18.0249	21.5256	0	0	20.1761	18.2252	13.6806	316.411	74.134	418.87	19.7752	0	2.08996	1.35776	0	0.0268336	2.0494	0.725833	1.19105	0.420875	19.7311	16.3147	4.7024	3.74302	23.8591	1.02671	1.22611	0	0	1.14924	1.03812	0.779253	18.0229
HIC183	12	f	3.94286	26.6843	4.09996	9.86693	3.99014	15.3693	7.38854	17.3559	NA	141.623	201.17	92.0543	56.0766	213.055	13.4765	57.109	0.0287152	2.28513	13.5504	9.67973	12.3722	171.396	74.0655	213.055	35.2927	1.15692	2.05083	0.315105	0.758328	0.306664	1.18122	0.56785	1.33389	NA	10.8845	15.461	7.07488	4.3098	16.3745	1.03574	4.38914	0.00220692	0.175625	1.04142	0.74394	0.950872	13.1728
HIC184	13	f	20.8737	60.8883	25.1573	37.0398	43.1398	10.5249	43.2268	293.582	64.0443	3176.81	3555.67	613.55	211.031	3844.17	123.299	65.0366	5.50227	9.68312	41.0284	26.8323	133.618	3366.24	412.291	3844.17	94.1679	7.5927	0.883936	0.365216	0.537719	0.626275	0.152793	0.627538	4.26203	0.929752	46.1189	51.6189	8.90712	3.0636	55.8071	1.78998	0.944159	0.0798783	0.140573	0.595624	0.389534	1.93977	48.8689
HIC187	9	f	6.15	22.8591	0	32.3253	0	0	18.6592	11.8643	NA	530.999	813.315	103.664	54.7206	625.458	34.9863	37.5121	0	0	18.3948	0	15.2618	672.157	79.1922	625.458	36.2492	0	1.12634	0	1.59277	0	0	0.919399	0.584594	NA	26.1641	40.0746	5.10785	2.69626	30.8183	1.72389	1.84834	0	0	0.906372	0	0.751997	33.1193
HIC188	14	m	30.04	127.8	16.2219	9.71542	86.3291	14.3836	77.9352	186.314	30.1313	3523.02	4449.42	877.032	207.651	4256.25	42.6367	187.737	0	0	51.2457	50.3564	98.1269	3986.22	542.342	4256.25	115.187	0	1.28919	0.163639	0.0980049	0.87085	0.145096	0.786176	1.87946	0.303951	35.5387	44.8838	8.84712	2.0947	42.9352	0.4301	1.89381	0	0	0.516944	0.507973	0.989861	40.2113
HIC189	3.5	m	3.21429	12.3221	39.8145	9.43202	29.7297	14.6552	11.4552	0.246563	NA	285.532	340.775	63.0156	34.1119	317.71	33.9144	116.243	0	0	20.5229	22.1925	5.85087	313.153	48.5637	317.71	75.0785	0	1.16168	3.75355	0.889214	2.8028	1.38164	1.07995	0.023245	NA	26.9188	32.1269	5.94086	3.21594	29.9525	3.19732	10.9589	0	0	1.93482	2.09222	0.551597	29.5228
HIC191	12	m	8.63571	68.2205	16.1715	20.512	6.00203	3.28316	16.6863	89.6575	73.982	1161.69	1375.99	382.493	196.263	1341.38	26.225	30.6185	4.94921	0	34.968	4.6426	60.1086	1268.84	289.378	1341.38	28.4217	2.4746	2.39388	0.567462	0.719774	0.210613	0.115207	0.585527	3.14611	2.59605	40.7642	48.2841	13.4218	6.88695	47.0694	0.920245	1.07441	0.173669	0	1.22704	0.16291	2.10923	44.5241
HIC195	10	f	5.4	26.3113	11.3556	11.5041	9.01629	8.78575	10.1886	47.5784	NA	398.713	489.122	122.974	65.4812	585.12	30.5158	39.8375	7.5858	0	16.3903	8.90102	28.8835	443.918	94.2277	585.12	35.1766	3.7929	1.4765	0.637238	0.645573	0.505965	0.493028	0.57175	2.66994	NA	22.3745	27.4479	6.90091	3.67459	32.835	1.71244	2.23555	0.42569	0	0.919771	0.499496	1.62085	24.9112
HIC219	6	m	4.35	60.8726	16.2806	15.6782	3.87888	5.69957	37.4612	33.8653	29.6911	376.625	500.812	98.4859	73.8485	459.661	18.7607	12.4745	0	0	30.9438	4.78922	33.6725	438.719	86.1672	459.661	15.6176	0	4.24052	1.13414	1.09218	0.270211	0.397044	2.60962	2.35913	2.06835	26.2365	34.8876	6.86074	5.14444	32.021	1.30691	0.868998	0	0	2.15561	0.333628	2.3457	30.5621
HIC231	5	m	3.54545	46.3863	7.70582	18.2101	27.131	2.53441	0	9.27015	NA	328.914	426.42	19.0212	14.2696	471.843	24.1809	36.1475	9.7302	0	24.1008	14.8327	4.63508	377.667	16.6454	471.843	30.1642	4.8651	3.96465	0.658617	1.55642	2.31889	0.216617	0	0.792321	NA	28.1123	36.4462	1.62574	1.21962	40.3285	2.06675	3.08953	0.831641	0	2.05989	1.26775	0.39616	32.2792
OLD041	76	f	3.45525	19.4371	9.92106	8.85027	9.43559	10.5157	42.2975	23.7933	31.7685	142.138	183.063	79.5394	59.6043	232.004	14.516	20.6124	2.26433	1.60685	12.7362	9.97566	32.6198	162.601	69.5719	232.004	17.5642	1.93559	1.70466	0.870091	0.776181	0.827515	0.922245	3.70955	2.08671	2.78614	12.4657	16.0549	6.97572	5.22738	20.3471	1.27307	1.80773	0.198585	0.140923	1.11698	0.87488	2.8608	14.2603
OLD042	65	m	6.5565	35.4987	4.29688	1.88168	10.0181	11.7476	153.622	64.2296	NA	565.276	872.578	128.772	47.2109	509.253	22.9351	48.7538	3.98799	5.54106	13.8924	10.8829	108.926	718.927	87.9916	509.253	35.8444	4.76452	1.64069	0.198595	0.0869682	0.463018	0.542956	7.10014	2.96858	NA	26.1261	40.3291	5.95164	2.18201	23.5368	1.06002	2.25332	0.184318	0.256098	0.642084	0.502987	5.03436	33.2276
OLD043	83	f	5.2235	16.8707	3.89567	2.17177	8.95022	4.43262	43.4516	21.0871	45.5155	238.036	325.997	178.435	149.028	324.707	47.49	45.6084	3.40223	0	7.64603	6.69142	36.6848	282.016	163.731	324.707	46.5492	1.70111	0.978716	0.225999	0.125991	0.519228	0.257149	2.52075	1.22332	2.64049	13.8092	18.912	10.3515	8.64555	18.8372	2.75503	2.64587	0.197373	0	0.443569	0.388189	2.12819	16.3606
OLD044	81	f	6.525	45.2435	2.06646	4.61624	0	4.47346	51.1722	78.0992	80.1783	569.369	864.164	182.715	95.5571	780.004	14.9307	31.673	0.128852	0	17.3087	2.23673	69.8166	716.767	139.136	780.004	23.3018	0.0644261	2.10117	0.0959693	0.214385	0	0.207754	2.37651	3.62704	3.72359	26.4423	40.133	8.48556	4.43781	36.2245	0.693401	1.47094	0.00598408	0	0.803843	0.103877	3.24238	33.2877
OLD045	85	m	5.133	21.9777	8.73369	2.65735	3.14996	1.58269	64.5798	56.8332	21.2191	368.743	490.641	130.816	124.685	382.964	25.7	23.1897	0	0	11.1229	2.36632	47.544	429.692	127.751	382.964	24.4448	0	1.29747	0.5156	0.156878	0.18596	0.0934352	3.81251	3.35519	1.25268	21.769	28.9654	7.72283	7.36087	22.6086	1.51722	1.36902	0	0	0.656649	0.139698	2.80679	25.3672
OLD047	84	m	6.15825	34.8785	1.38102	9.15506	5.40133	6.24892	45.1881	33.4808	37.8813	392.353	383.776	172.801	250.921	613.996	6.30947	10.5858	0.155851	7.98202	15.1382	5.82512	38.8501	388.065	211.861	613.996	8.44764	4.06894	1.71627	0.0679561	0.450495	0.265784	0.307492	2.22358	1.6475	1.86404	19.3066	18.8845	8.50303	12.3471	30.213	0.310471	0.520899	0.00766901	0.392773	0.744908	0.286638	1.91171	19.0956
OLD048	52	f	4.154	54.7176	11.4028	5.30958	0	0.0304627	40.7065	20.8166	20.4046	169.251	246.674	71.1777	79.6082	244.887	17.7546	31.454	4.49682	0	23.81	0.0152313	27.3093	207.962	75.3929	244.887	24.6043	2.24841	3.9916	0.831821	0.387329	0	0.00222222	2.9695	1.51855	1.4885	12.3467	17.9946	5.19234	5.80734	17.8643	1.29518	2.29454	0.328039	0	1.73692	0.00111111	1.99218	15.1706
OLD049	34	f	2.9585	22.8756	3.6026	2.63186	12.8645	9.34003	6.03857	6.05148	NA	163.901	331.786	113.245	48.929	274.11	30.7455	34.0851	3.53196	3.34189	9.70336	11.1023	6.04502	247.843	81.0871	274.11	32.4153	3.43693	2.34308	0.369004	0.269574	1.31767	0.956671	0.618513	0.619835	NA	16.7878	33.9838	11.5994	5.01166	28.0762	3.14917	3.49124	0.361768	0.3423	0.993886	1.13717	0.619174	25.3858
PS 003	26	f	3.195	17.5862	7.51248	8.70725	4.31749	4.39269	3.33933	14.4974	2.88808	125.77	98.985	117.067	62.8992	144.777	14.5713	15.4143	2.25469	0	11.2686	4.35509	6.90829	112.377	89.9829	144.777	14.9928	1.12735	1.81659	0.776014	0.89943	0.445982	0.453751	0.344942	1.49754	0.298329	12.9916	10.2248	12.0926	6.49728	14.9549	1.50517	1.59224	0.232902	0	1.16401	0.449867	0.713603	11.6082
PS 004	51	m	4.34	12.3111	1.49519	0.927715	0	0.0326875	18.0552	22.7195	47.5308	226.741	354.395	153.148	55.0391	254.236	11.755	2.0709	0	0	4.91132	0.0163438	29.4352	290.568	104.094	254.236	6.91293	0	0.936187	0.113701	0.0705476	0	0.00248571	1.373	1.72769	3.61446	17.2424	26.9498	11.6461	4.18542	19.3332	0.8939	0.15748	0	0	0.373479	0.00124285	2.23838	22.0961
PS 005	34	m	3.312	25.1305	5.93477	2.58849	3.14096	0.015161	43.4312	38.058	22.493	111.988	183.138	83.364	53.6112	94.0459	3.38553	18.5268	1.16498	0	11.2179	1.57806	34.6608	147.563	68.4876	94.0459	10.9562	0.582489	2.5042	0.591386	0.257937	0.312989	0.00151076	4.32782	3.79239	2.24138	11.1593	18.2493	8.30703	5.34223	9.37145	0.33736	1.84615	0.116087	0	1.11784	0.15725	3.45386	14.7043
PS 007	47	f	2.96	35.9391	9.91941	0.0452752	0.500243	0	3.04027	7.29606	36.528	171.947	154.646	70.2701	57.3315	153.273	5.23732	11.955	0	3.95087	15.3013	0.250121	15.6215	163.296	63.8008	153.273	8.59618	1.97544	4.00713	1.10599	0.00504808	0.0557759	0	0.338983	0.813494	4.07279	19.1716	17.2426	7.83495	6.39233	17.0896	0.583949	1.33296	0	0.440513	1.70606	0.027888	1.74176	18.2071
PS 055	33	m	6.14	23.7012	5.21962	5.95054	26.72	9.14517	75.2861	48.6635	87.1523	371.451	546.73	277.595	61.9771	443.028	47.098	44.6479	0	0	11.6238	17.9326	70.3673	459.09	169.786	443.028	45.8729	0	1.27397	0.280561	0.319849	1.43624	0.491565	4.04673	2.61573	4.68455	19.966	29.3874	14.9211	3.33135	23.8134	2.53158	2.39988	0	0	0.624793	0.9639	3.78233	24.6767
PS 062	43	m	4.608	14.0691	8.17805	0.0111048	0	4.76255	35.0706	32.1871	5.69058	479.181	470.313	117.382	17.4074	521.057	15.039	14.4386	4.29251	0	7.41942	2.38128	24.3161	474.747	67.395	521.057	14.7388	2.14625	1.00765	0.585726	0.000795342	0	0.341102	2.51182	2.3053	0.407569	34.3198	33.6846	8.40714	1.24675	37.319	1.07712	1.03412	0.307437	0	0.531392	0.170551	1.74156	34.0022
PS 063	29	m	8.328	60.8279	26.1772	20.698	10.3171	0	319.073	214.92	80.48	534.11	1041.97	228.103	60.0042	684.856	31.9531	48.3764	0	0	35.901	5.15856	204.824	788.038	144.054	684.856	40.1647	0	2.41057	1.03739	0.820246	0.40886	0	12.6446	8.51711	3.18937	21.1664	41.2924	9.03958	2.37793	27.1404	1.26628	1.91712	0	0	1.42273	0.20443	8.11704	31.2294
PS 064	25	m	5.42143	39.0196	3.31482	3.77623	29.5267	3.11086	133.382	52.3158	93.4052	414.873	585.174	165.153	62.6168	452.438	18.5168	42.2784	0	4.13048	15.3702	16.3188	93.0344	500.024	113.885	452.438	30.3976	2.06524	2.37534	0.201792	0.22988	1.79746	0.189375	8.11973	3.18476	5.6861	25.2557	35.6229	10.0538	3.81184	27.5425	1.12722	2.57372	0	0.251446	0.935672	0.993416	5.66353	30.4393
TEMP 001-0	25	f	5.3175	23.3801	3.81802	2.63828	0.132478	1.65002	22.5852	28.425	NA	541.849	370.195	147.906	61.8693	354.423	9.09487	18.5338	0	2.12017	9.94545	0.891248	25.5051	456.022	104.888	354.423	13.8143	1.06008	1.45109	0.236967	0.163746	0.00822233	0.102409	1.40176	1.76421	NA	33.6301	22.9763	9.17987	3.83995	21.9974	0.564477	1.15031	0	0.131589	0.617269	0.0553157	1.58298	28.3032
TEMP 002-0	37	m	7.675	37.0107	4.22713	23.5927	50.0068	51.0007	20.2693	30.1008	NA	627.203	534.125	89.0094	26.2345	488.957	70.642	130.121	0	0	21.6102	50.5038	25.1851	580.664	57.622	488.957	100.382	0	1.5915	0.181771	1.01451	2.15035	2.19308	0.871603	1.29437	NA	26.9704	22.9679	3.8275	1.12811	21.0257	3.03768	5.59535	0	0	0.929259	2.17171	1.08298	24.9692
TEMP 003-0	26	m	6.07038	79.5611	10.8298	17.0053	35.1854	11.5259	63.6005	50.14	NA	726.474	441.548	127.92	63.5748	427.352	55.5658	53.7694	6.60907	0.13375	35.7988	23.3556	56.8703	584.011	95.7474	427.352	54.6676	3.37141	4.32555	0.588794	0.924541	1.91295	0.626634	3.45781	2.726	NA	39.4968	24.006	6.95471	3.45642	23.2341	3.02098	2.92332	0.35932	0.00727167	1.9463	1.26979	3.09191	31.7514
TEMP 004-0	35	m	6.63	33.5984	10.5731	12.6823	9.42719	2.95483	35.4458	40.6423	NA	712.987	648.663	160.641	36.166	681.578	40.7663	42.9191	0	4.26034	18.9513	6.19101	38.044	680.825	98.4037	681.578	41.8427	2.13017	1.67248	0.526316	0.631308	0.469274	0.147088	1.76445	2.02312	NA	35.4916	32.2896	7.99652	1.8003	33.9281	2.02929	2.13646	0	0.212074	0.943369	0.308181	1.89378	33.8906
TEMP 005-0	27	f	1.8225	19.7111	15.4827	8.95327	0.491515	0	23.482	4.29927	NA	162.169	203.114	83.7954	40.5241	124.759	20.9766	24.1737	0	0	14.7157	0.245758	13.8906	182.642	62.1597	124.759	22.5752	0	3.56945	2.80374	1.62133	0.0890076	0	4.2523	0.778547	NA	29.3669	36.7816	15.1743	7.33842	22.5923	3.79862	4.37756	0	0	2.66484	0.0445038	2.51543	33.0743
TEMP 006-0	25.5	m	8.535	24.1012	13.0503	6.62127	13.3941	7.26434	59.4631	73.3954	21.3476	1206.73	827.793	135.824	95.498	959.665	36.7215	41.7057	15.7752	0	14.5909	10.3292	51.402	1017.26	115.661	959.665	39.2136	7.88758	0.931948	0.504633	0.256033	0.517928	0.280899	2.29933	2.83807	0.825472	46.6619	32.0092	5.25206	3.69273	37.1085	1.41995	1.61268	0.609997	0	0.564204	0.399413	1.98762	39.3356
TEMP 007-0	62	f	5.7225	43.913	8.88949	8.79337	0	0	154.208	60.2203	NA	573.057	433.622	104.107	42.366	404.026	14.9515	46.7287	8.2665	0	20.532	0	107.214	503.339	73.2365	404.026	30.8401	4.13325	2.53259	0.512682	0.507139	0	0	8.89362	3.47308	NA	33.0498	25.0082	6.00415	2.44337	23.3013	0.862293	2.69498	0.476753	0	1.18414	0	6.18335	29.029
TEMP 008-0	55	f	3.1575	33.1466	NA	25.8659	4.29436	5.28819	0.741071	0	NA	253.186	NA	196.413	143.949	300.007	47.6047	NA	0	0	29.5062	4.79128	0.370535	253.186	170.181	300.007	47.6047	0	3.4646	NA	2.70359	0.448862	0.552741	0.0774593	0	NA	26.4639	NA	20.5298	15.0461	31.3578	4.97581	NA	0	0	3.0841	0.500801	0.0387297	26.4639
TEMP 009-0	68	m	5.01	45.9036	12.9097	2.24614	8.49322	4.98949	58.4524	21.936	NA	232.165	219.704	193.309	107.013	287.721	22.1491	21.6444	8.61474	0.740141	20.3532	6.74135	40.1942	225.935	150.161	287.721	21.8967	4.67744	3.02389	0.850425	0.147964	0.559489	0.328682	3.85054	1.44503	NA	15.2939	14.473	12.7342	7.04946	18.9536	1.45907	1.42582	0.567495	0.0487567	1.34076	0.444086	2.64779	14.8834
TEMP 010-0	50	m	4.085	22.8745	9.10114	10.2835	8.2286	7.66346	112.895	28.0134	NA	384.89	244.582	158.571	33.7999	225.746	24.9634	34.6225	8.37382	0.292613	14.0864	7.94603	70.4542	314.736	96.1856	225.746	29.793	4.33322	1.84806	0.735294	0.830821	0.664801	0.619142	9.12095	2.26324	NA	31.0958	19.7601	12.8112	2.73074	18.2383	2.01683	2.7972	0.676533	0.0236407	1.13806	0.641971	5.6921	25.428
TEMP 013-0	30	f	4.0875	46.2636	6.54328	8.42165	19.9589	4.89105	67.9864	29.3026	NA	239.627	219.069	75.654	104.605	203.627	29.3155	22.9686	2.81267	2.34596	20.4095	12.425	48.6445	229.348	90.1293	203.627	26.1421	2.57932	3.73542	0.528318	0.679981	1.61152	0.394913	5.48936	2.36595	NA	19.348	17.6881	6.10845	8.446	16.4412	2.36699	1.85453	0.227101	0.189418	1.64791	1.00322	3.92766	18.518
TEMP 014-0	23	f	3.9175	8.54984	0	3.00376	1.36226	2.11538	50.2158	16.8955	NA	242.945	110.783	105.463	52.9225	188.062	3.98503	4.90159	1.92291	0	3.8512	1.73882	33.5557	176.864	79.1929	188.062	4.44331	0.961456	0.720288	0	0.253055	0.114765	0.178212	4.23047	1.42338	NA	20.4671	9.33301	8.88484	4.4585	15.8435	0.335722	0.412939	0.161997	0	0.324448	0.146489	2.82692	14.9001
TEMP 015-0	32	f	3.165	18.9234	4.25472	9.48122	9.96487	2.8409	8.72351	15.1931	6.72979	281.68	212.18	60.5655	17.9481	230.165	22.4138	26.4798	0.107015	0.202175	10.8864	6.40289	10.2155	246.93	39.2568	230.165	24.4468	0.154595	1.97325	0.443665	0.988662	1.0391	0.296237	0.909652	1.58427	0.701754	29.3724	22.1252	6.31552	1.87155	24.0006	2.33722	2.7612	0.0111591	0.0210819	1.13519	0.667666	1.06523	25.7488
TEMP 016-0	21	f	4.71	27.796	5.59659	8.37036	11.964	4.29883	70.3189	17.2881	7.34012	280.967	228.7	92.1563	60.1911	239.908	23.5821	28.0734	3.78903	0.74225	13.921	8.13142	31.649	254.834	76.1737	239.908	25.8277	2.26564	1.94769	0.392157	0.586517	0.838326	0.301222	4.92729	1.21139	0.514328	19.6876	16.0252	6.45746	4.21763	16.8105	1.65241	1.96712	0.2655	0.05201	0.975454	0.569774	2.21767	17.8564
TEMP 017-0	49	f	1.67692	37.0261	1.5891	0.0150203	10.5786	0.45515	24.7261	28.9375	24.9231	192.261	280.767	259.885	66.4244	280.408	14.8728	22.5482	3.36983	0.0388063	12.8767	5.51687	26.1956	236.514	163.155	280.408	18.7105	1.70432	2.3718	0.860404	0.184092	0.353626	0.143856	4.51962	2.62007	3.64675	13.3468	22.813	15.249	4.89726	19.3646	1.1686	2.27261	0.00786065	0	1.13877	0.248741	3.59548	18.0799
VAC 001A	21	f	3.945	14.8548	7.56541	10.2817	0	6.73734	7.82167	30.1662	NA	227.821	NA	147.102	28.0753	240.625	27.7985	7.68351	0	0	10.9006	3.36867	18.9939	227.821	87.5886	240.625	17.741	0	1.24273	0.632911	0.860151	0	0.563636	0.65435	2.52366	NA	19.0591	NA	12.3063	2.34874	20.1303	2.32558	0.642792	0	0	0.911932	0.281818	1.589	19.0591
VAC 002A	21	m	3.36	7.94793	NA	5.46039	3.21161	0	31.8907	17.6048	NA	182.624	NA	137.269	57.3406	181.866	5.90762	20.2603	0	0	6.70416	1.6058	24.7477	182.624	97.3049	181.866	13.084	0	0.780678	NA	0.536342	0.315457	0	3.13243	1.72921	NA	17.9381		13.4831	5.63223	17.8636	0.580271	1.99005	0	0	0.65851	0.157729	2.43082	17.9381
VAC 003A	56	f	2.1	17.6831	1.44449	0	2.80789	0	6.48522	4.26273	6.11827	84.1176	69.4001	73.4351	34.1357	103.846	3.82644	9.96882	0	1.67302	6.37588	1.40395	5.62207	76.7589	53.7854	103.846	6.89763	0.83651	2.77906	0.227015	0	0.441285	0	1.01921	0.669925	0.961538	13.2198	10.9068	11.5409	5.36471	16.3203	0.601358	1.56669	0	0.262929	1.00202	0.220642	0.883557	12.0633
VAC 004A	31	f	1.845	32.4233	1.10673	0.0397789	12.0236	5.78016	20.4913	9.13302	NA	74.3356	NA	64.4	30.8608	117.719	28.8644	36.7015	3.88264	0	11.1899	8.90186	14.8122	74.3356	47.6304	117.719	32.783	1.94132	5.79987	0.197971	0.00711563	2.15077	1.03395	3.66549	1.63371	NA	13.2971	NA	11.5199	5.52036	21.0575	5.16326	6.56515	0.694525	0	2.00165	1.59236	2.6496	13.2971
VAC 005A	25	f	3.39	15.1922	6.25443	6.46763	7.39756	1.19043	16.4316	20.7441	NA	126.25	154.465	94.5838	60.4122	121.015	8.72746	10.9967	0.030163	0	9.30476	4.294	18.5879	140.358	77.498	121.015	9.8621	0.0150815	1.47904	0.608899	0.629656	0.720188	0.115894	1.5997	2.01954	NA	12.2911	15.038	9.20819	5.88142	11.7814	0.849661	1.07059	0.00293651	0	0.905863	0.418041	1.80962	13.6645
VAC 006A	26	f	2.1	15.3339	NA	0	1.89622	0	19.4459	20.0422	NA	109.494	25.8055	52.7149	18.7016	183.705	0.0542941	1.71163	0.0498453	2.82325	7.66694	0.94811	19.7441	67.6496	35.7083	183.705	0.882964	1.43655	2.40985	NA	0	0.298007	0	3.05609	3.14981	NA	17.2079	4.05556	8.2846	2.93912	28.8708	0.00853279	0.268998	0.00783361	0.443698	1.20493	0.149004	3.10295	10.6317
VAC 008A	26	f	2.49	32.2309	5.77211	4.94432	3.9283	0	16.7028	18.8659	NA	170.419	251.037	97.2765	59.0288	167.684	15.6111	8.95159	2.447	0.0218516	14.3158	1.96415	17.7843	210.728	78.1527	167.684	12.2813	1.23443	4.27199	0.765054	0.655337	0.52067	0	2.21384	2.50056	NA	22.5879	33.2733	12.8934	7.82388	22.2254	2.06914	1.18647	0.324334	0.00289628	1.89746	0.260335	2.3572	27.9306
VAC 009A	27	m	3.3	11.0222	0	2.23586	5.32498	3.3973	39.1421	38.5326	NA	104.046	178.084	59.5758	34.0142	159.76	9.66142	14.0421	0	0	4.41937	4.36114	38.8374	141.065	46.795	159.76	11.8517	0	1.10233	0	0.223608	0.532551	0.339764	3.9146	3.85364	NA	10.4056	17.8102	5.95817	3.40176	15.9776	0.966238	1.40435	0	0	0.441981	0.436157	3.88412	14.1079
VAC 010A	23	f	2.955	24.3053	1.6826	4.39285	7.09631	2.33229	24.7423	12.1829	NA	144.094	184.968	93.7811	62.5445	216.445	20.9155	23.1691	0.057515	0	10.1269	4.7143	18.4626	164.531	78.1628	216.445	22.0423	0.0287575	2.71457	0.187923	0.490621	0.79256	0.260485	2.76338	1.36067	NA	16.0934	20.6583	10.4741	6.98537	24.1739	2.33598	2.58767	0.00642364	0	1.13104	0.526523	2.06202	18.3759
VAC 011A	23	f		6.45239	1.57135	2.98542	3.79713	2.57911	11.6329	5.19074	NA	96.8838	124.506	31.8102	10.5295	100.942	14.7873	5.92877	0.0174259	0	3.66972	3.18812	8.41183	110.695	21.1699	100.942	10.358	0.00871297	1.29061	0.314301	0.597143	0.759502	0.515874	2.32682	1.03825	NA	19.3787	24.9037	6.36268	2.10611	20.1904	2.95776	1.18587	0.00348554	0	0.734017	0.637688	1.68253	22.1412
VAC 012A	22	f	3.81	18.9903	4.30044	0	1.61599	0	22.4957	22.6669	NA	230.596	235.519	79.39	33.7191	266.984	6.69833	9.74835	0.847575	1.49525	7.76357	0.807995	22.5813	233.058	56.5546	266.984	8.22334	1.17141	1.64499	0.372517	0	0.139982	0	1.94864	1.96347	NA	19.9749	20.4013	6.87699	2.92084	23.1269	0.580229	0.84443	0.0734194	0.129522	0.672502	0.0699908	1.95605	20.1881
VAC 013A	22	f	5.115	32.7861	3.5837	1.64989	1.77907	8.29091	31.8291	32.6358	NA	398.489	447.747	123.16	63.0056	449.842	31.4952	11.5431	1.72443	0	12.6732	5.03499	32.2324	423.118	93.0828	449.842	21.5191	0.862215	2.11544	0.23123	0.106455	0.11479	0.534951	2.0537	2.10574	NA	25.7116	28.8898	7.94661	4.06528	29.025	2.03215	0.744792	0.111265	0	0.817709	0.324871	2.07972	27.3007
VAC 014A	30	m	2.85	13.7488	0.192929	4.26821	12.0149	6.66199	61.3594	18.5159	26.5603	145.857	199.395	52.2353	23.7561	129.237	14.0639	9.28012	0	0	6.06996	9.33845	35.4786	172.626	37.9957	129.237	11.672	0	1.59212	0.0223414	0.494263	1.39134	0.771465	7.10549	2.14416	3.07571	16.8904	23.0901	6.04891	2.75098	14.9658	1.62861	1.07465	0	0	0.702908	1.0814	4.10845	19.9903
VAC 015A	29	m	2.79	12.9532	NA	1.643	2.37931	0	11.5601	18.388	NA	160.588	NA	102.503	19.6734	187.282	4.16637	5.54568	0	2.89709	7.29808	1.18966	14.9741	160.588	61.0882	187.282	4.85603	1.44854	1.53225	NA	0.194352	0.281452	0	1.36746	2.17515	NA	18.9962	NA	12.1252	2.3272	22.1538	0.492846	0.656007	0	0.3427	0.8633	0.140726	1.7713	18.9962
VAC 016A	28	m	3.195	9.28226	0	0	1.79364	1.97925	36.4307	16.2306	NA	110.346	NA	145.802	32.3613	122.996	7.01511	10.0147	0	0	3.09409	1.88644	26.3307	110.346	89.0814	122.996	8.51489	0	0.958827	0	0	0.185277	0.20445	3.76317	1.67657	NA	11.3984	NA	15.0608	3.34282	12.7051	0.724638	1.03448	0	0	0.319609	0.194863	2.71987	11.3984
VAC 017A	27	m	6.24	29.5664	NA	5.23262	1.07918	3.19687	71.6966	50.6645	NA	488.167	NA	238.984	50.98	530.038	19.4538	14.9661	0	0	17.3995	2.13802	61.1805	488.167	144.982	530.038	17.2099	0	1.56376	NA	0.276753	0.0570776	0.169082	3.79203	2.67964	NA	25.8191	NA	12.6398	2.69633	28.0336	1.02891	0.791557	0	0	0.920258	0.11308	3.23583	25.8191
VAC 018A	21	f	2.175	25.1779	NA	3.84089	3.03798	3.78267	30.7842	5.97165	NA	135.043	NA	106.516	53.2038	147.172	9.61388	10.7823	0	0	14.5094	3.41033	18.3779	135.043	79.8599	147.172	10.1981	0	3.82047	NA	0.582814	0.460981	0.57398	4.67117	0.906134	NA	20.4914	NA	16.1627	8.07312	22.3318	1.4588	1.63609	0	0	2.20164	0.51748	2.78865	20.4914
VAC 020A	30	m	6.765	30.6333	0.180107	5.65659	7.55387	7.80012	216.067	101.519	219.072	249.555	437.336	194.679	59.5229	279.731	29.1362	31.1919	4.23843	4.3536	12.1567	7.677	178.886	343.445	127.101	279.731	30.1641	4.29601	1.49446	0.00878657	0.275959	0.368518	0.380532	10.5409	4.95263	10.6875	12.1746	21.3356	9.4975	2.90384	13.6468	1.42142	1.52171	0.206773	0.212392	0.593068	0.374525	8.72702	16.7551
VAC 021A	22	m	2.88	20.768	13.3362	5.85816	7.11248	1.12958	35.5374	7.88279	5.72491	181.189	263.554	99.6295	22.5421	180.089	8.75413	4.19871	4.39232	0	13.3208	4.12103	16.3817	222.371	61.0858	180.089	6.47642	2.19616	2.3799	1.52826	0.671315	0.815053	0.129444	4.0724	0.903327	0.656045	20.7633	30.2019	11.417	2.5832	20.6372	1.00318	0.481151	0.503337	0	1.52649	0.472248	1.87726	25.4826
VAC 022A	21	f	2.25	17.7286	4.75087	6.61063	4.50318	1.49695	27.0688	6.49121	NA	64.0711	123.53	40.2556	19.3782	112.75	19.9541	11.3811	5.87622	0	9.6967	3.00007	16.78	93.8003	29.8169	112.75	15.6676	2.93811	2.60045	0.696864	0.969656	0.660532	0.219575	3.97049	0.95214	NA	9.39804	18.1195	5.90474	2.84241	16.5383	2.92689	1.6694	0.861931	0	1.42232	0.440054	2.46132	13.7588
VAC 023A	29	m	4.59	7.68388	5.70097	0	3.31991	2.30782	116.499	104.011	125.734	333.933	482.669	89.1536	16.7295	286.009	9.09649	21.0925	0	0	4.46162	2.81387	115.415	408.301	52.9416	286.009	15.0945	0	0.552491	0.409915	0	0.23871	0.165939	8.3766	7.47865	9.04059	24.0107	34.7052	6.41038	1.2029	20.5648	0.654062	1.5166	0	0	0.320802	0.202325	8.29861	29.3579
VAC 024A	22	f	5.12	33.9317	32.365	12.7327	11.715	4.81772	58.0825	22.0108	NA	269.189	444.068	185.808	89.2208	335.358	34.2271	33.9057	4.88749	9.83125	26.3431	8.26637	40.0467	356.628	137.514	335.358	34.0664	7.35937	2.18722	2.08623	0.820745	0.755145	0.310548	3.74397	1.41881	NA	17.3518	28.6244	11.9771	5.75114	21.617	2.20626	2.18555	0.315046	0.633718	1.69807	0.532847	2.58139	22.9881
VAC 025A	26	m	4.7	35.0212	14.7857	7.95227	11.8481	4.67547	97.3554	38.6211	NA	260.483	348.175	105.553	58.5037	286.624	19.6907	26.1943	8.00343	0	19.2531	8.26179	67.9883	304.329	82.0285	286.624	22.9425	4.00172	2.45918	1.03825	0.558407	0.831971	0.328311	6.83628	2.71197	NA	18.2911	24.4488	7.41193	4.10812	20.1267	1.38268	1.83936	0.561999	0	1.35195	0.580141	4.77412	21.3699
VAC 026A	24	f		20.0283	9.95576	2.77297	3.41419	4.62556	19.9624	12.959	6.03242	128.925	101.057	80.6384	44.7378	156.548	6.41864	17.328	1.34173	1.5013	10.919	4.01987	12.9846	114.991	62.6881	156.548	11.8733	1.42152	2.5181	1.25171	0.348636	0.429255	0.581557	2.5098	1.62929	0.758438	16.2094	12.7056	10.1384	5.62474	19.6823	0.806995	2.17859	0.168692	0.188754	1.37281	0.505406	1.63251	14.4575
VAC 027A	21	f	3.9	22.1181	0.820625	7.00636	5.96146	0	48.1338	34.7723	14.6405	177.038	265.429	228.211	60.0498	285.386	22.7445	34.7444	0.0764904	0	9.9817	2.98073	32.5155	221.234	144.13	285.386	28.7444	0.0382452	1.87172	0.0694444	0.592905	0.504482	0	4.07326	2.94257	1.23894	14.9816	22.4616	19.3121	5.08165	24.1505	1.92473	2.9402	0.00647291	0	0.84469	0.252241	2.75159	18.7216
VAC 028A	26	f	2.55	24.4274	1.57225	2.3889	0.560181	5.2197	13.7133	12.2441	NA	112.404	153.207	90.3589	34.7597	164.736	14.2804	5.22175	0	0	9.46286	2.88994	12.9787	132.806	62.5593	164.736	9.75107	0	3.16151	0.203488	0.309182	0.0725013	0.675559	1.77484	1.58469	NA	14.5479	19.8288	11.6947	4.49876	21.3209	1.84824	0.675823	0	0	1.22473	0.37403	1.67977	17.1883
VAC 029A	23	m	7.305	48.0114	8.24253	8.4719	6.43356	2.19282	74.4994	86.1485	66.1684	729.476	764.262	215.429	78.5094	823.922	19.8741	33.9629	0	0	21.5753	4.31319	75.6054	746.869	146.969	823.922	26.9185	0	2.16911	0.37239	0.382753	0.290662	0.0990697	3.36581	3.89211	2.98943	32.957	34.5287	9.73288	3.54698	37.224	0.897894	1.53441	0	0	0.974751	0.194866	3.41578	33.7428
VAC 030A	32	f	2.595	15.1382	4.50241	0.0863148	7.02825	4.97711	25.2831	13.9009	NA	95.8863	146.627	82.9809	32.1165	144.398	18.4005	19.0142	0.0634305	0	6.57565	6.00268	19.592	121.256	57.5487	144.398	18.7074	0.0317153	1.92528	0.572618	0.0109776	0.893855	0.63299	3.21551	1.76792	NA	12.1949	18.648	10.5535	4.08459	18.3646	2.34018	2.41824	0.00806712	0	0.836293	0.763422	2.49172	15.4214
VAC 031A	21	f	2.79	20.3826	9.09	12.5433	4.75886	4.70915	13.2334	8.11095	NA	75.0072	139.154	66.3538	30.2416	173.502	16.6447	20.5203	0.0768553	2.49937	14.0053	4.734	10.6722	107.081	48.2977	173.502	18.5825	1.28811	2.41108	1.07527	1.48377	0.562932	0.557052	1.5654	0.959455	NA	8.87271	16.4607	7.84908	3.57732	20.5238	1.96892	2.42738	0.00909132	0.295654	1.65671	0.559992	1.26243	12.6667
VAC 032A	24	f	7.11	27.4012	20.0311	1.89969	4.63942	3.53417	3.2077	14.6372	7.35266	89.6537	199.799	154.131	29.0126	162.289	24.9945	27.8327	7.96429	1.73942	16.444	4.0868	8.3992	144.726	91.572	162.289	26.4136	4.85185	1.27191	0.929806	0.0881799	0.215353	0.16405	0.148896	0.679433	0.341297	4.16156	9.27429	7.15449	1.34671	7.53313	1.1602	1.29194	0.369687	0.0807407	0.763299	0.189702	0.389875	6.71792
VAC 033A	24	f	3.285	21.9158	3.17245	8.60495	2.49379	0.281195	11.2219	15.6518	0	128.932	173.734	74.3268	28.9985	141.549	5.89994	15.3626	3.83542	1.75106	11.2311	1.38749	8.95792	151.333	51.6627	141.549	10.6313	2.79324	2.20181	0.318725	0.86451	0.250543	0.0282508	1.12743	1.57249	0	12.9533	17.4544	7.46737	2.91339	14.2209	0.592748	1.54343	0.385331	0.175923	1.12835	0.139397	0.899973	15.2039
VAC 035A	22	f	4.515	19.2983	6.22501	3.30855	0.0403101	1.9029	40.83	32.0235	43.0504	130.114	213.25	96.266	53.6872	176.603	7.44263	5.7612	2.42998	0	9.61064	0.971608	38.6346	171.682	74.9766	176.603	6.60191	1.21499	1.41065	0.45503	0.241845	0.00294655	0.139097	2.98455	2.34083	3.14685	9.51094	15.5879	7.03676	3.92438	12.9091	0.544034	0.421127	0.177624	0	0.702509	0.0710216	2.82408	12.5494
VAC 036A	21	m	3.915	26.863	2.98489	5.69048	4.60663	2.01169	63.3827	36.1224	67.4449	188.339	248.194	122.698	50.8298	271.078	3.18556	16.8433	4.12856	3.50901	11.8461	3.30916	55.65	218.266	86.7638	271.078	10.0144	3.81879	2.26454	0.251625	0.479706	0.388337	0.169585	5.34314	3.0451	5.68558	15.8769	20.9226	10.3434	4.28494	22.8518	0.268541	1.41989	0.348036	0.295808	0.998623	0.278961	4.69127	18.3998
VAC 037A	20	f	4.305	23.2365	6.1978	4.83149	7.14367	1.73933	39.5715	26.1086	4.64459	439.911	686.561	79.0297	40.4924	543.77	8.78496	10.6606	2.35865	0.0116559	11.4219	4.4415	23.4416	563.236	59.7611	543.77	9.72278	1.18516	1.78137	0.47514	0.370395	0.547653	0.133342	3.03366	2.00156	0.356067	33.7248	52.6336	6.05863	3.10426	41.6869	0.673479	0.817271	0.180821	0.000893575	0.875636	0.340497	1.79709	43.1792
VAC 041A	34	f	2.73	26.2774	NA	8.18688	7.61385	9.6515	25.5427	27.0576	NA	NA	NA	NA	40.95	252.542	30.923	NA	3.50876	NA	17.2321	8.63267	26.3002	NA	40.95	252.542	30.923	3.50876	3.1767	NA	0.989722	0.920447	1.16678	3.08789	3.27103	NA	NA	NA	NA	4.9505	30.5301	3.73832	NA	0.424178	NA	2.08321	1.04361	3.17946	NA
VAC 042A	22	f	3.57	18.7316	12.4573	4.89643	9.73215	4.37263	13.6163	25.6534	2.21209	315.732	247.746	73.4947	48.3284	247.426	22.0433	22.2188	5.6078	0	12.0285	7.05239	13.8273	281.739	60.9115	247.426	22.131	2.8039	1.73167	1.15163	0.452657	0.899701	0.404233	1.25877	2.37156	0.204499	29.1882	22.9032	6.7943	4.46778	22.8736	2.03782	2.05404	0.51842	0	1.11199	0.651967	1.27828	26.0457
VAC 043A	64	f	4.71	25.5831	16.9392	9.31993	16.4182	7.79073	28.5237	47.3825	NA	473.565	428.321	135.547	79.7417	354.969	41.8854	50.8704	7.96717	1.00149	17.2808	12.1045	37.9531	450.943	107.645	354.969	46.3779	4.48433	1.79263	1.18694	0.653054	1.15044	0.545902	1.99867	3.32012	NA	33.183	30.0128	9.49791	5.58756	24.8729	2.93494	3.56453	0.558265	0.0701754	1.21088	0.848169	2.6594	31.5979
VAC 044A	60	f	3.18	31.3701	11.2381	14.7595	39.0059	23.0636	34.6256	39.1032	1.29161	266.772	147.879	101.02	39.7655	250.581	93.1666	95.364	2.5673	4.66618	19.1226	31.0348	25.0068	207.326	70.3928	250.581	94.2653	3.61674	3.25571	1.16634	1.5318	4.04819	2.39364	3.59358	4.05829	0.134048	27.6867	15.3475	10.4843	4.12702	26.0063	9.6692	9.89725	0.266445	0.484275	1.98461	3.22091	2.5953	21.5171
VAC 045A	52	f	6.54	56.6517	4.76911	27.3455	95.6498	67.1136	101.005	61.7266	66.4761	607.172	679.149	237.405	93.7316	677.712	290.594	235.011	8.17141	6.7533	29.5888	81.3817	76.4026	643.161	165.568	677.712	262.802	7.46236	2.85886	0.240667	1.37996	4.82685	3.3868	5.0971	3.11496	3.35463	30.6402	34.2724	11.9804	4.73005	34.1999	14.6645	11.8595	0.41236	0.340797	1.49316	4.10683	3.85556	32.4563
VAC 046A	37	m	8.055	73.255	16.3647	21.3219	29.4481	10.6704	102.083	106.136	156.763	937.936	885.405	221.488	43.0195	821.689	81.101	133.118	5.79549	7.02051	36.9805	20.0592	121.661	911.67	132.254	821.689	107.109	6.408	3.00144	0.6705	0.873611	1.20656	0.437191	4.18259	4.34866	6.42298	38.4295	36.2772	9.07488	1.76262	33.6666	3.3229	5.45416	0.237455	0.287647	1.51518	0.821876	4.98474	37.3534
VAC 047A	55.5	f	1.86	12.9544	2.96648	7.0591	32.33	14.4638	15.5981	29.2693	44.3265	206.177	161.287	77.4703	20.8226	186.116	65.1475	83.3945	1.96481	2.51114	7.65998	23.3969	29.7313	183.732	49.1464	186.116	74.271	2.23798	2.29859	0.526364	1.25255	5.73654	2.56641	2.76768	5.19345	7.86517	36.5835	28.6184	13.7461	3.6947	33.0239	11.5596	14.7973	0.34863	0.44557	1.35917	4.15147	5.27543	32.6009
VAC 048A	59	f	10.155	15.7682	33.6306	26.2876	76.0068	13.6869	123.633	87.7051	30.0485	806.591	632.512	405.586	220.195	634.277	171.1	205.706	4.34061	13.1184	25.2288	44.8469	80.4622	719.551	312.891	634.277	188.403	8.72949	0.512459	1.09298	0.854335	2.47019	0.444818	4.01802	2.85038	0.976562	26.2138	20.5564	13.1814	7.15624	20.6137	5.56066	6.68536	0.141068	0.426341	0.819924	1.4575	2.61499	23.3851
VAC 049A	32	m	1.755	12.2923	3.94818	7.63746	8.29578	5.06655	47.5782	15.8696	14.7713	157.577	158.43	32.0139	15.9626	123.724	16.5073	23.4712	0	2.07476	7.95931	6.68117	26.073	158.004	23.9883	123.724	19.9893	1.03738	2.3116	0.742467	1.43625	1.56005	0.95278	8.94722	2.98433	2.77778	29.6329	29.7932	6.02031	3.00182	23.2667	3.10425	4.41383	0	0.390166	1.49677	1.25641	4.90311	29.7131
VAC 050A	53	f	5.01	34.516	2.6135	13.4601	12.2161	3.85067	11.4785	10.6697	NA	463.264	329.775	79.8854	115.395	317.455	63.337	64.3591	0.0540436	5.04329	16.8632	8.03337	11.0741	396.519	97.6404	317.455	63.848	2.54867	2.27374	0.172164	0.886682	0.804732	0.253662	0.756144	0.702864	NA	30.5174	21.7239	5.26244	7.60165	20.9123	4.17231	4.23965	0.00356011	0.332226	1.11086	0.529197	0.729504	26.1206
VAC 051A	37	m	8.7	48.5145	3.23299	16.4785	78.4712	35.039	121.662	94.6189	39.7837	785.932	588.487	112.498	87.3303	717.33	168.809	173.337	1.8135	10.499	22.742	56.7551	85.355	687.21	99.9139	717.33	171.073	6.15623	1.84039	0.122643	0.62511	2.97679	1.3292	4.61524	3.58935	1.50919	29.8142	22.3242	4.26758	3.31286	27.2118	6.40376	6.57553	0.0687947	0.398276	0.862714	2.153	3.23793	26.0692
VAC 052A	65	m	5.595	31.5516	12.6429	4.91174	21.0349	8.44709	80.8298	45.4327	9.79934	551.542	499.176	188.689	30.3904	503.948	55.6852	43.0818	0.0918008	0	16.3687	14.741	45.3539	525.359	109.54	503.948	49.3835	0.0459004	1.86114	0.745767	0.28973	1.24079	0.49827	4.76792	2.67994	0.578035	32.5339	29.445	11.1302	1.79264	29.7265	3.28471	2.54127	0.00541506	0	0.965544	0.869528	2.6753	30.9894
VAC 053A	36	f	4.965	68.5976	5.47819	3.29756	32.6698	5.89273	48.9331	29.2891	NA	520.732	509.134	96.675	64.7007	531.659	43.4283	96.2326	8.75335	13.2065	25.7911	19.2813	39.1111	514.933	80.6878	531.659	69.8304	10.9799	4.55982	0.364146	0.219195	2.17163	0.391701	3.25267	1.9469	NA	34.614	33.8431	6.42617	4.30078	35.3404	2.88676	6.39676	0.581852	0.877863	1.71439	1.28166	2.59979	34.2286
VAC 054A	41	m	11.79	34.697	1.31935	8.21724	28.5294	13.7497	173.941	142.528	NA	1391.89	1230.87	215.618	67.9744	1219.2	100.899	89.9752	0	4.50072	14.7445	21.1396	158.235	1311.38	141.796	1219.2	95.4369	2.25036	0.971259	0.0369322	0.230022	0.798612	0.384891	4.86907	3.98975	NA	38.9626	34.4552	6.0357	1.90278	34.1286	2.82441	2.51864	0	0.125987	0.412738	0.591752	4.42941	36.7089
VAC 055A	48	f	4.86	30.4409	14.9948	10.8703	52.266	21.1698	39.558	40.8332	2.73206	553.895	473.764	208.64	84.0982	448.315	94.5201	114.141	9.89139	23.6898	18.7686	36.7179	27.7077	513.83	146.369	448.315	104.33	16.7906	2.06718	1.01827	0.738178	3.54928	1.4376	2.6863	2.7729	0.185529	37.6139	32.1724	14.1683	5.71095	30.4442	6.41867	7.75106	0.671704	1.60873	1.27454	2.49344	1.88158	34.8932
VAC 056A	44	f	5.955	31.5676	16.2387	6.11551	25.2679	13.7107	145.946	90.3471	58.4315	596.771	688.572	213.807	65.2446	518.605	68.4989	65.4193	11.8402	3.52241	17.9739	19.4893	98.2416	642.671	139.526	518.605	66.9591	7.68129	1.74952	0.899965	0.338929	1.40038	0.75986	8.08851	5.00714	3.23834	33.0737	38.1614	11.8495	3.61593	28.7417	3.79629	3.62561	0.656196	0.195216	0.996136	1.08012	5.44466	35.6176
VAC 057A	41	f	6.12	50.9352	7.3115	17.7663	81.7536	34.1643	52.4748	63.0061	381.853	728.527	594.028	173.225	57.0585	688.371	176.535	213.565	7.80579	12.8205	25.3377	57.9589	165.778	661.278	115.141	688.371	195.05	10.3132	2.74678	0.394287	0.958083	4.40872	1.84238	2.82981	3.39773	20.5922	39.2873	32.0341	9.34147	3.07699	37.1218	9.52002	11.5169	0.420943	0.691371	1.36638	3.12555	8.93991	35.6607
VAC 058A	40	f	4.485	40.208	10.8787	0.0367173	6.19539	15.3075	16.4254	36.2407	114.39	304.641	313.291	155.878	71.1502	315.991	39.8871	49.0258	0.038512	11.5183	17.0412	10.7515	55.6854	308.966	113.514	315.991	44.4564	5.77838	2.95875	0.800523	0.00270188	0.455894	1.12642	1.20868	2.66681	8.41751	22.4173	23.0538	11.4705	5.23566	23.2525	2.93513	3.60761	0.00283394	0.847581	1.25399	0.791156	4.09766	22.7355
VAC 059A	63.7	f	3.735	13.0025	23.4778	10.3167	26.5911	13.7247	35.2872	7.65048	0	306.265	417.751	132.025	67.5978	268.591	79.8909	54.7493	0	0.193608	15.599	20.1579	14.3126	362.008	99.8116	268.591	67.3201	0.0968041	1.14893	2.07455	0.911604	2.34965	1.21274	3.11805	0.676014	0	27.0623	36.9134	11.6661	5.9731	23.7333	7.05934	4.83777	0	0.0171077	1.37836	1.7812	1.26469	31.9878
VAC 060A	42	f	5.175	34.2792	2.69016	0.858952	2.69799	6.53145	21.0323	65.2203	1.02923	856.447	969.848	118.877	71.2739	823.592	38.0097	32.0771	1.24727	0	12.6094	4.61472	29.0939	913.148	95.0753	823.592	35.0434	0.623633	2.18614	0.171563	0.0547792	0.172063	0.41654	1.34133	4.15939	0.0656383	54.6195	61.8516	7.5813	4.54545	52.5242	2.42405	2.0457	0.0795437	0	0.80416	0.294302	1.85545	58.2355
VAC 061A	61	f	8.22	83.5158	20.3839	7.24934	2.48974	0	113.797	36.8328	68.1966	960.808	472.027	191.802	86.6978	538.784	53.2172	87.3557	0	7.11556	37.0497	1.24487	72.9421	716.417	139.25	538.784	70.2864	3.55778	3.35316	0.818414	0.291061	0.099963	0	4.56895	1.47884	2.7381	38.5764	18.9519	7.70086	3.48092	21.6322	2.13667	3.50733	0	0.28569	1.48754	0.0499815	2.92863	28.7642
VAC 062A	56	f	6.525	40.9393	4.05388	12.1712	23.5193	9.27907	89.6597	45.4939	30.8069	818.288	565.702	176.503	55.3258	595.512	51.2445	67.6268	2.74015	7.8031	19.0548	16.3992	55.3202	691.995	115.914	595.512	59.4356	5.27162	2.0707	0.205044	0.615618	1.1896	0.469333	4.53497	2.30107	1.5582	41.3888	28.6131	8.92749	2.79837	30.1209	2.59194	3.42055	0.138596	0.394679	0.963788	0.829468	2.79808	35.001
VAC 063A	73	m	14.46	123.663	75.9729	71.712	71.3918	36.7034	186.409	198.886	259.912	1680.76	1111.1	711.682	173.925	1336.4	113.651	177.981	54.8992	45.4528	90.4493	54.0476	215.069	1395.93	442.803	1336.4	145.816	50.176	2.82247	1.73399	1.63674	1.62944	0.837714	4.25458	4.53935	5.9322	38.3614	25.3596	16.2433	3.96964	30.5019	2.59394	4.06221	1.25301	1.03741	2.0644	1.23357	4.90871	31.8605
VAC 064A	44	f	4.5	58.5273	4.68021	14.6959	9.54222	9.00799	133.726	42.5643	NA	428.144	232.683	300.387	139.552	284.23	64.4081	46.0403	8.69976	12.7855	25.9678	9.2751	88.145	330.414	219.97	284.23	55.2242	10.7426	4.29243	0.343249	1.07781	0.699833	0.660652	9.80753	3.12169	NA	31.4004	17.0651	22.0306	10.2349	20.8456	4.72374	3.37662	0.638046	0.937695	1.9045	0.680242	6.46461	24.2328
VAC 065A	38	f	3.855	36.9054	7.1485	7.40453	12.0556	0.184317	0.837666	16.1788	51.6272	355.786	168.495	137.832	61.5599	267.885	17.7	26.907	3.39867	0	17.1528	6.11995	22.8812	262.141	99.6958	267.885	22.3035	1.69934	3.15953	0.611995	0.633914	1.0321	0.0157797	0.071714	1.38509	4.41989	30.4594	14.4252	11.8	5.27025	22.9341	1.51533	2.30355	0.290966	0	1.46848	0.523939	1.9589	22.4423
VAC 066A	35	f	1.92	21.1651	8.57946	3.14117	11.9268	7.48015	45.4178	29.8178	NA	250.788	186.531	78.9216	21.8127	167.456	35.4884	22.9353	3.4844	1.92582	10.9619	9.70349	37.6178	218.659	50.3672	167.456	29.2119	2.70511	3.63811	1.47474	0.539942	2.05013	1.28578	7.80696	5.12545	NA	43.1084	32.0632	13.566	3.74943	28.7845	6.10018	3.9424	0.598942	0.331033	1.88427	1.66795	6.4662	37.5858
VAC 067A	42	m	1.83	16.3649	2.91009	2.38353	7.34229	6.12078	30.9333	17.6434	13.2207	259.884	103.459	23.2694	30.4411	124.428	8.13141	14.2089	0.924595	0	7.21949	6.73153	20.5991	181.672	26.8553	124.428	11.1702	0.462297	2.95134	0.524822	0.42986	1.32415	1.10386	5.5787	3.18191	2.38429	46.8689	18.6585	4.19654	5.48993	22.4401	1.46647	2.56253	0.166747	0	1.30201	1.214	3.71497	32.7637
VAC 068A	39	f	7.11	39.3539	14.5525	12.5531	11.4999	11.2576	43.8566	44.493	NA	838.589	527.911	NA	72.1471	514.587	30.2505	64.3053	2.97532	9.36057	22.1532	11.3788	31.3933	683.25	72.1471	514.587	47.2779	6.16795	1.82674	0.675498	0.582692	0.533803	0.522558	2.03574	2.06528	0.270636	38.9258	24.5047	NA	3.34894	23.8862	1.40417	2.98493	0.138109	0.4345	1.02831	0.528181	1.45722	31.7152
VAC 069A	43	f	4.02	32.8813	27.519	25.6756	51.0388	24.0792	48.9077	25.7055	NA	670.607	376.632	154.574	98.3388	375.302	107.703	132.873	8.36197	6.56693	28.6919	37.559	37.3066	523.619	126.456	375.302	120.288	7.46445	2.69948	2.25925	2.10791	4.19017	1.97685	4.01521	2.11036	NA	55.0553	30.9206	12.6902	8.07339	30.8114	8.84215	10.9086	0.686499	0.53913	2.35554	3.08351	3.06279	42.988
VAC 070A	45	f	2.55	31.6896	12.1624	16.3547	17.5963	4.0085	24.7641	22.131	NA	435.406	244.55	98.102	85.0651	251.175	44.5018	52.2381	10.1699	8.90632	20.0689	10.8024	23.4475	339.978	91.5835	251.175	48.37	9.53813	4.10142	1.57411	2.1167	2.27739	0.518799	3.20508	2.8643	NA	56.3523	31.6509	12.6968	11.0095	32.5083	5.75963	6.7609	1.31624	1.1527	2.59741	1.39809	3.03469	44.0016
VAC 071A	61	f	3.03	30.6648	20.512	18.1922	82.3873	41.4569	32.6697	42.5255	NA	476.137	332.573	92.5569	38.1637	362.154	196.658	195.213	7.55837	8.72763	23.123	61.9221	37.5976	404.355	65.3603	362.154	195.936	8.143	3.34006	2.23421	1.98152	8.97378	4.51556	3.55844	4.63196	NA	51.8617	36.2245	10.0815	4.15686	39.4465	21.4204	21.263	0.823271	0.950629	2.5186	6.74467	4.0952	44.0431
VAC 072A	65	m	3.345	15.0651	7.51623	1.96952	5.32558	3.29018	56.5995	35.4943	NA	391.722	264.272	95.0255	47.5323	215.201	13.2331	27.4113	0.270468	0.644251	8.18363	4.30788	46.0469	327.997	71.2789	215.201	20.3222	0.457359	1.48639	0.741586	0.194322	0.525446	0.324625	5.58437	3.50203	NA	38.6491	26.0743	9.37565	4.68975	21.2327	1.30564	2.70452	0.0266856	0.0635647	0.807434	0.425035	4.5432	32.3617
VAC 073A	38	f	3.075	19.4827	10.3015	5.96698	20.173	0.11338	70.6445	52.6189	18.4135	376.719	330.136	NA	34.7359	288.061	46.7528	35.1626	0.203068	3.9772	11.9171	10.1432	47.2256	353.427	34.7359	288.061	40.9577	2.09013	2.09104	1.10563	0.640423	2.16513	0.0121688	7.58212	5.64747	1.97628	40.4324	35.4327	NA	3.72813	30.917	5.01788	3.77393	0.0217948	0.426864	1.27903	1.08865	5.06862	37.9326
VAC 074A	48	f	1.59	18.0389	0.651786	5.00481	4.38398	1.54505	39.7554	14.6454	16.1078	268.511	139.661	50.8457	20.4265	150.676	15.3269	24.9593	0	0.839686	7.89851	2.96452	23.5029	204.086	35.6361	150.676	20.1431	0.419843	3.7443	0.13529	1.03884	0.909974	0.320704	8.25195	3.03991	3.34347	55.7342	28.9892	10.5539	4.23988	31.2754	3.18136	5.18075	0	0.174292	1.63948	0.615339	4.87844	42.3617
VAC 075A	36	f	4.8	42.0739	5.54174	14.7578	23.9656	14.3617	53.3709	47.5247	47.3906	820.098	478.627	NA	63.1881	511.053	38.7534	35.7993	3.75935	2.59324	20.7911	19.1636	49.4287	649.362	63.1881	511.053	37.2764	3.17629	2.89287	0.381033	1.0147	1.6478	0.987466	3.66962	3.26765	3.25843	56.3874	32.9089	NA	4.34461	35.1384	2.66456	2.46145	0.258481	0.178303	1.42953	1.31763	3.39856	44.6481
VAC 076A	42	f	4.005	99.5718	51.6774	67.3826	83.8295	68.5866	95.0324	50.1426	226.884	598.772	472.528	NA	160.016	386.157	117.676	59.5104	91.714	63.1356	72.8772	76.208	124.02	535.65	160.016	386.157	88.5933	77.4248	8.20524	4.25849	5.55268	6.90799	5.65189	7.83117	4.13201	18.6964	49.342	38.9388	NA	13.1862	31.8214	9.69713	4.90397	7.55772	5.2027	6.00547	6.27994	10.2199	44.1404
VAC 077A	51	f	5.61	88.6072	45.0579	48.3	62.8631	49.878	78.1459	58.0692	438.036	847.337	782.569	NA	94.7925	613.93	68.5415	64.4954	25.9966	33.7273	60.655	56.3706	191.417	814.953	94.7925	613.93	66.5185	29.8619	5.21271	2.65073	2.84146	3.6982	2.93429	4.59728	3.41618	25.7694	49.8483	46.0381	NA	5.57659	36.1171	4.03226	3.79423	1.52936	1.98416	3.5683	3.31625	11.261	47.9432
VAC 078A	45	f	3.63	35.4345	3.77203	14.732	21.6593	17.9785	103.785	37.7259	NA	492.796	360.465	93.4204	46.7656	305.83	32.146	42.7306	6.91201	0	17.9795	19.8189	70.7555	426.63	70.093	305.83	37.4383	3.45601	3.22164	0.342946	1.3394	1.96922	1.63457	9.43595	3.42997	NA	44.8041	32.7728	8.49362	4.25184	27.8055	2.92266	3.88499	0.628428	0	1.63466	1.8019	6.43296	38.7885
VAC 079A	42	f	7.725	76.0549	3.37547	11.2726	43.3064	48.996	187.594	85.3045	NA	1048.03	740.657	380.927	305.746	596.939	149.639	149.267	4.52729	4.50354	30.2344	46.1512	136.449	894.342	343.336	596.939	149.453	4.51541	3.24927	0.144209	0.481598	1.85017	2.09324	8.01455	3.64444	NA	44.7746	31.6429	16.2742	13.0623	25.5028	6.39297	6.37709	0.193418	0.192404	1.29169	1.9717	5.82949	38.2087
VAC 080A	44	f	3.06	47.5758	14.1454	4.21561	17.6639	1.17509	63.5751	52.274	15.3761	413.089	412.343	118.601	42.2376	283.594	19.3521	31.4248	2.82324	2.59127	21.9789	9.4195	43.7417	412.716	80.4192	283.594	25.3884	2.70725	5.13123	1.52564	0.45467	1.90512	0.126738	6.85682	5.63796	1.65837	44.5532	44.4728	12.7915	4.55549	30.5867	2.0872	3.38928	0.304497	0.279478	2.37051	1.01593	4.71772	44.513
VAC 081A	40	f	7.17	5.23412	9.42748	12.7739	17.5951	23.7879	25.6192	95.4601	NA	993.789	1048.41	196.474	49.9568	767.815	54.752	134.521	7.39273	10.2904	9.14518	20.6915	60.5397	1021.1	123.216	767.815	94.6364	8.84157	0.240925	0.433944	0.587981	0.809895	1.09495	1.17925	4.394	NA	45.7438	48.2582	9.04366	2.2995	35.3423	2.52022	6.19195	0.340285	0.473664	0.42095	0.952423	2.78662	47.001
VAC 082A	22	m	3.105	17.1037	1.45113	4.00787	10.9276	3.38921	40.6253	13.5894	NA	370.406	258.327	70.2715	26.8738	357.187	22.2684	12.2961	6.89787	5.10157	7.5209	7.15841	27.1073	314.367	48.5727	357.187	17.2822	5.99972	1.81797	0.154242	0.426	1.1615	0.360242	4.31809	1.44443	NA	39.3708	27.4578	7.46922	2.85644	37.9657	2.36693	1.30696	0.73318	0.54225	0.799403	0.760873	2.88126	33.4143
VAC 084A	40	f	7.995	40.3095	14.1666	16.7307	14.8246	16.3427	128.376	117.95	NA	892.255	NA	244.513	38.0842	770.663	10.6872	30.3346	0.0554738	0.0462183	23.7356	15.5836	123.163	892.255	141.298	770.663	20.5109	0.050846	1.66397	0.584795	0.690641	0.611959	0.674624	5.29937	4.86896	NA	36.8322	NA	10.0935	1.57211	31.8129	0.441168	1.25221	0.00228995	0.00190789	0.979803	0.643291	5.08416	36.8322
VAC 085A	44	f	3.75	19.2377	13.1524	14.8335	32.1656	7.5181	23.0413	27.1154	NA	288.381	325.525	154.677	53.3334	333.544	27.6297	34.9562	13.7836	2.68336	15.7412	19.8419	25.0784	306.953	104.005	333.544	31.293	8.23347	1.69309	1.15753	1.30548	2.83086	0.661659	2.02784	2.3864	NA	25.3801	28.649	13.6129	4.69381	29.3548	2.43166	3.07645	1.21308	0.23616	1.38536	1.74626	2.20712	27.0146
VAC 086A	38	m	3.63	16.4402	0	10.1541	35.492	30.7769	27.3422	4.64053	NA	215.371	175.606	78.1616	36.7891	147.887	35.999	33.2603	20.995	34.5624	8.86479	33.1344	15.9914	195.488	57.4754	147.887	34.6296	27.7787	1.49472	0	0.923196	3.22686	2.79818	2.4859	0.421909	NA	19.5811	15.9658	7.10631	3.3448	13.4456	3.27296	3.02396	1.90882	3.14235	0.805971	3.01252	1.45391	17.7734
VAC 087A	37	m	4.965	41.0688	13.0169	15.7274	36.2641	23.348	196.881	43.1936	129.482	492.358	379.738	NA	118.664	297.303	69.1433	69.1393	7.77188	11.0294	23.271	29.806	123.186	436.048	118.664	297.303	69.1413	9.40065	2.72992	0.865257	1.04543	2.41054	1.55198	13.0871	2.87116	8.60692	32.728	25.2419	NA	7.88782	19.7623	4.59608	4.59582	0.516611	0.733147	1.54687	1.98126	8.18838	28.9849
VAC 088A	38	m	10.59	57.9371	6.41853	18.6075	17.5627	17.064	158.238	78.9771	89.2784	1566.63	1032.07	NA	131.596	1129.73	35.1297	44.3353	0.379018	0	27.6544	17.3134	108.831	1299.35	131.596	1129.73	39.7325	0.189509	1.80559	0.200031	0.579894	0.547334	0.531793	4.93144	2.46129	2.78232	48.8235	32.1641	NA	4.10114	35.2076	1.0948	1.38169	0.011812	0	0.861837	0.539564	3.39168	40.4938
VAC 089A	37	m	9.42	27.549	0	0	10.2048	4.97457	242.8	146.502	144.924	1681.68	1431.21	NA	58.0616	1152.46	44.6469	49.9909	4.33244	5.01992	9.183	7.58967	178.075	1556.44	58.0616	1152.46	47.3189	4.67618	0.965189	0	0	0.357527	0.174286	8.50659	5.13274	5.07745	58.9182	50.1429	NA	2.03421	40.3769	1.56422	1.75145	0.151789	0.175875	0.32173	0.265907	6.23893	54.5306
VAC 090A	37	m	5.595	67.9717	44.7325	42.1275	90.5747	43.8738	181.817	83.9698	113.294	909.164	480.323	NA	129.099	641.968	161.369	121.647	57.7898	31.7701	51.6106	67.2243	126.36	694.743	129.099	641.968	141.508	44.78	4.00946	2.63864	2.48498	5.34274	2.58799	10.7249	4.95314	6.68287	53.629	28.3328	NA	7.61516	37.8678	9.5187	7.17559	3.40886	1.87403	3.04436	3.96537	7.45362	40.9809
VAC 091A	42	m	4.635	42.26	2.66141	24.8393	0.20398	11.0738	118.865	40.1239	66.655	489.324	337.622	NA	45.4528	345.705	50.4898	43.7416	7.75952	0	23.2536	5.63887	75.2146	413.473	45.4528	345.705	47.1157	3.87976	3.00911	0.189504	1.76867	0.0145243	0.788502	8.46373	2.857	4.74614	34.8421	24.0402	NA	3.23645	24.6158	3.5951	3.1146	0.552513	0	1.65576	0.401513	5.35562	29.4411
VAC 092A	61	m	10.98	65.2217	5.67987	26.2092	49.3908	9.56768	210.37	144.967	138.979	1822.56	1384.87	NA	120.944	1390.48	96.1348	57.187	10.782	15.1482	32.3702	29.4792	164.772	1603.72	120.944	1390.48	76.6609	12.9651	1.96041	0.170724	0.787786	1.48457	0.287582	6.32322	4.35736	4.17738	54.782	41.6261	NA	3.6353	41.7945	2.88959	1.71891	0.324082	0.455318	0.972973	0.886077	4.95265	48.204
VAC 093A	43	m	6.48	40.5655	1.58087	3.38649	14.7982	12.8829	57.106	27.726	28.2509	702.53	424.812	NA	188.091	431.19	29.0041	26.2348	0	23.1913	15.1776	13.8406	37.6943	563.671	188.091	431.19	27.6195	11.5956	2.06604	0.0805153	0.172477	0.753688	0.656139	2.90847	1.41211	1.43885	35.7806	21.6361	NA	9.57967	21.9609	1.47721	1.33617	0	1.18116	0.773012	0.704913	1.91981	28.7083
VAC 094A	48	m	8.505	43.873	10.4432	3.12683	14.9931	8.50795	139.429	75.8141	15.8655	1529.08	1254.84	78.1579	76.5648	1085.76	82.0125	125.99	0	0	19.1477	11.7505	77.0362	1391.96	77.3613	1085.76	104.002	0	1.70247	0.405244	0.121335	0.5818	0.330147	5.41048	2.94194	0.615655	59.3354	48.6936	3.03288	2.97107	42.1324	3.18246	4.88901	0	0	0.743018	0.455974	2.98936	54.0145
VAC 095A	36	m	7.455	65.9489	3.17524	28.5285	41.6064	23.389	104.92	63.6874	116.918	892.602	592.864	214.181	161.772	560.987	38.9316	51.0934	11.3984	14.9693	32.5509	32.4977	95.1752	742.733	187.976	560.987	45.0125	13.1838	2.91956	0.140568	1.26296	1.84191	1.03543	4.6448	2.81944	5.17598	39.5155	26.2461	9.4818	7.16164	24.8349	1.7235	2.2619	0.504606	0.662691	1.44103	1.43867	4.21341	32.8808
VAC 096A	69	m	4.83	27.0693	13.508	14.4218	7.06784	0.271298	16.8687	20.5444	NA	497.317	315.644	112.03	38.3433	319.492	20.1908	23.249	0	5.41339	18.333	3.66957	18.7065	406.481	75.1867	319.492	21.7199	2.7067	1.84964	0.922998	0.985441	0.482944	0.0185377	1.15264	1.40379	NA	33.9816	21.5679	7.65499	2.61999	21.8309	1.37963	1.5886	0	0.369896	1.25269	0.250741	1.27821	27.7748
[truncated: 40 more columns]

## Sheet: Temporal cohort Fig 2
related to figure 2
sample type			cfDNA	cfDNA	cfDNA	cfDNA	cfDNA	cfDNA	cfDNA	cfDNA	cfDNA	cfDNA	cfDNA	cfDNA	cfDNA	cfDNA	cfDNA	cfDNA	cfDNA	cfDNA	cfDNA	cfDNA	cfDNA	cfDNA	cfDNA	cfDNA	cfDNA	cfDNA	cfDNA	cfDNA	cfDNA	cfDNA	cfDNA	cfDNA	cfDNA	cfDNA	cfDNA	cfDNA	cfDNA	cfDNA	cfDNA	cfDNA	cfDNA	cfDNA	cfDNA	cfDNA	cfDNA	cfDNA	cfDNA
units			ng/ml	GE/ml	GE/ml	GE/ml	GE/ml	GE/ml	GE/ml	GE/ml	GE/ml	GE/ml	GE/ml	GE/ml	GE/ml	GE/ml	GE/ml	GE/ml	GE/ml	GE/ml	GE/ml	GE/ml	GE/ml	GE/ml	GE/ml	GE/ml	GE/ml	GE/ml	GE/ml	%	%	%	%	%	%	%	%	%	%	%	%	%	%	%	%	%	%	%	%
cell type				B cells	B cells	B cells	CD8	CD8	Eosinophils	Eosinophils	Eosinophils	Granulocytes	Granulocytes	Monocytes	Monocytes	Neutrophils	T cell	T cell	Tregs	Tregs	B cells	CD8	Eosinophils	Granulocytes	Monocytes	Neutrophils	T cell	Tregs	neutrophils +granulocytes	B cells	B cells	B cells	CD8	CD8	Eosinophils	Eosinophils	Eosinophils	Granulocytes	Granulocytes	Monocytes	Monocytes	Neutrophils	T cell	T cell	Tregs	Tregs	B cells	CD8	Eosinophils
	age	gender	Total cfDNA	BCELL3	BCELL1	BCELL2	CD8A	CD8B	EOSI3	EOSI2	EOSI1	NEUT2	NEUT1	MONO1	MONO2	NEUT3	TCELL1	TCELL2	TREG1	TREG2	average	average	average	average	average	average	average	average	average	BCELL3	BCELL1	BCELL2	CD8A	CD8B	EOSI3	EOSI2	EOSI1	NEUT2	NEUT1	MONO1	MONO2	NEUT3	TCELL1	TCELL2	TREG1	TREG2	average	average	average
TEMP 001-0	25	f	5.3175	23.3801	3.81802	2.63828	0.132478	1.65002	22.5852	28.425	NA	541.849	370.195	147.906	61.8693	354.423	9.09487	18.5338	0	2.12017	9.94545	0.891248	25.5051	456.022	104.888	354.423	13.8143	1.06008	405.223	1.45109	0.236967	0.163746	0.00822233	0.102409	1.40176	1.76421	NA	33.6301	22.9763	9.17987	3.83995	21.9974	0.564477	1.15031	0	0.131589	0.617269	0.0553157	1.58298
TEMP 001-1			6	40.5032	0	11.192	25.5337	10.5227	22.5429	19.8346	NA	300.942	170.438	210.734	101.128	223.378	24.0771	15.4379	4.09549	0	17.2317	18.0282	21.1887	235.69	155.931	223.378	19.7575	2.04774	229.534	2.2279	0	0.615623	1.40449	0.578804	1.23998	1.09101	NA	16.5535	9.375	11.5915	5.56262	12.287	1.32437	0.849171	0.225274	0	0.947841	0.991649	1.1655
TEMP 001-2			6.9375	27.8127	12.4107	11.3275	12.4037	7.80998	69.3772	47.2777	NA	504.757	342.341	185.963	69.6713	370.137	36.0175	60.5117	2.65077	0	17.1836	10.1068	58.3275	423.549	127.817	370.137	48.2646	1.32539	396.843	1.32311	0.590406	0.538876	0.590071	0.371539	3.30044	2.24911	NA	24.0125	16.2859	8.84667	3.31443	17.6083	1.71343	2.87868	0.126103	0	0.817465	0.480805	2.77477
TEMP 001-3			5.98421	37.0408	15.0633	9.96585	0	0.146753	59.2082	32.5433	33.9912	208.233	426.214	194.064	97.8903	336.061	43.8607	51.7421	1.98768	6.15144	20.69	0.0733763	41.9142	317.223	145.977	336.061	47.8014	4.06956	326.642	2.04282	0.830752	0.549623	0	0.0080935	3.26537	1.79479	1.87463	11.4842	23.506	10.7027	5.39871	18.534	2.41895	2.85361	0.109622	0.339256	1.14107	0.00404675	2.3116
TEMP 001-4			8.0025	45.4736	14.7701	0.0818815	4.06839	24.914	46.2139	69.6884	128.966	528.608	830.675	265.209	136.221	619.455	29.4365	20.1407	0.0761676	3.8513	20.1085	14.4912	81.6226	679.642	200.715	619.455	24.7886	1.96374	649.548	1.87539	0.609137	0.00337689	0.167785	1.02749	1.90592	2.87404	5.3187	21.8005	34.2581	10.9376	5.61792	25.5471	1.214	0.830626	0.00314125	0.158833	0.829301	0.597635	3.36622
TEMP 001-5			6.41212	64.137	23.7402	15.4306	21.7417	19.5206	64.5551	40.0797	NA	625.922	448.638	187.786	102.679	421.875	39.4788	70.5964	8.06509	3.97011	34.436	20.6312	52.3174	537.28	145.232	421.875	55.0376	6.0176	479.578	3.30115	1.22192	0.794216	1.11905	1.00473	3.32266	2.06291	NA	32.2163	23.0915	9.66536	5.2849	21.714	2.03198	3.63361	0.415112	0.204342	1.77243	1.06189	2.69279
TEMP 002-0	37	m	7.675	37.0107	4.22713	23.5927	50.0068	51.0007	20.2693	30.1008	NA	627.203	534.125	89.0094	26.2345	488.957	70.642	130.121	0	0	21.6102	50.5038	25.1851	580.664	57.622	488.957	100.382	0	534.811	1.5915	0.181771	1.01451	2.15035	2.19308	0.871603	1.29437	NA	26.9704	22.9679	3.8275	1.12811	21.0257	3.03768	5.59535	0	0	0.929259	2.17171	1.08298
TEMP 002-1			4.6215	26.9091	0.5048	18.7557	5.27298	16.024	59.4876	14.5201	140.537	202.26	299.638	71.9052	86.4653	214.533	44.8055	72.4758	0	10.2469	15.3899	10.6485	71.5149	250.949	79.1852	214.533	58.6406	5.12344	232.741	1.92165	0.036049	1.33939	0.376557	1.14432	4.24816	1.03691	10.0361	14.4439	21.3979	5.13493	6.17471	15.3204	3.19968	5.17568	0	0.731756	1.09903	0.760436	5.10706
TEMP 002-2			6.57346	52.5116	7.10074	7.19561	8.65298	19.7159	43.5992	6.38314	NA	299.587	259.435	78.1023	40.1145	311.338	28.8737	36.4827	0	6.59772	22.2693	14.1844	24.9912	279.511	59.1084	311.338	32.6782	3.29886	295.424	2.63644	0.356506	0.361269	0.434439	0.989874	2.18898	0.320477	NA	15.0413	13.0254	3.92127	2.01402	15.6313	1.44966	1.83168	0	0.331251	1.11807	0.712156	1.25473
TEMP 002-3			3.855	62.235	13.0368	36.1382	27.8097	31.8694	35.8189	32.4879	1.84334	132.992	142.284	74.1644	45.7724	252.646	56.911	35.0322	38.2667	39.9885	37.1367	29.8395	23.3834	137.638	59.9684	252.646	45.9716	39.1276	195.142	5.32804	1.11611	3.09385	2.38083	2.72839	3.06652	2.78134	0.157812	11.3857	12.1812	6.34934	3.91865	21.6295	4.87225	2.99917	3.27607	3.42349	3.17933	2.55461	2.00189
TEMP 002-4			5.295	40.2644	21.0621	18.671	13.3936	22.9041	82.9225	22.3729	13.931	193.914	362.221	102.797	67.2859	234.552	35.154	74.8494	4.14487	23.0002	26.6658	18.1489	39.7421	278.068	85.0416	234.552	55.0017	13.5725	256.31	2.50965	1.31279	1.16375	0.834813	1.42759	5.16849	1.39449	0.868307	12.0865	22.5769	6.40727	4.19388	14.6194	2.19112	4.6653	0.258347	1.43358	1.66206	1.1312	2.47709
TEMP 002-5			8.665	39.4875	5.70084	7.44188	29.8972	25.5709	99.4987	56.6953	NA	629.661	438.702	135.099	79.5448	510.461	56.3196	36.4204	5.57267	6.81504	17.5434	27.734	78.097	534.182	107.322	510.461	46.37	6.19385	522.322	1.504	0.217134	0.283447	1.13873	0.973945	3.78971	2.15941	NA	23.9826	16.7093	5.14565	3.02971	19.4425	2.1451	1.38718	0.212252	0.259572	0.668195	1.05634	2.97456
TEMP 003-0	26	m	6.07038	79.5611	10.8298	17.0053	35.1854	11.5259	63.6005	50.14	NA	726.474	441.548	127.92	63.5748	427.352	55.5658	53.7694	6.60907	0.13375	35.7988	23.3556	56.8703	584.011	95.7474	427.352	54.6676	3.37141	505.681	4.32555	0.588794	0.924541	1.91295	0.626634	3.45781	2.726	NA	39.4968	24.006	6.95471	3.45642	23.2341	3.02098	2.92332	0.35932	0.00727167	1.9463	1.26979	3.09191
TEMP 003-1			3.594	54.7442	3.67899	17.2813	6.535	0	40.5164	16.0832	NA	233.331	225.765	62.243	67.5338	125.018	21.8494	28.6395	0	0	25.2349	3.2675	28.2998	229.548	64.8884	125.018	25.2444	0	177.283	5.0271	0.337838	1.58693	0.600102	0	3.72058	1.47691	NA	21.4265	20.7317	5.71571	6.20155	11.4802	2.00641	2.62993	0	0	2.31729	0.300051	2.59874
TEMP 003-2			7.8	71.171	14.7815	16.3699	8.43749	3.56162	186.772	52.2201	NA	853.417	586.607	202.478	75.0432	474.156	33.8827	15.1633	0.26567	4.72291	34.1075	5.99955	119.496	720.012	138.76	474.156	24.523	2.49429	597.084	3.01138	0.625434	0.692641	0.357006	0.150699	7.90269	2.20953	NA	36.1097	24.8205	8.56722	3.17522	20.0625	1.43364	0.641586	0.011241	0.199835	1.44315	0.253853	5.05611
TEMP 003-3			3.63	58.1024	9.1238	30.51	13.0097	17.4412	27.7371	42.923	12.461	234.374	250.898	65.4971	42.9155	306.821	47.3381	29.2535	23.5837	27.7134	32.5787	15.2255	27.707	242.636	54.2063	306.821	38.2958	25.6486	274.728	5.28256	0.829519	2.77391	1.18282	1.58572	2.52181	3.90248	1.13293	21.3088	22.8112	5.95488	3.9018	27.8956	4.30389	2.65967	2.14418	2.51966	2.962	1.38427	2.51907
TEMP 003-4			10.5404	59.4865	24.3296	18.7856	9.86741	5.3855	160.241	115.768	288.644	645.856	922.124	187.349	107.938	806.379	47.4016	43.1908	0	0.0631526	34.2006	7.62645	188.218	783.99	147.644	806.379	45.2962	0.0315763	795.184	1.86259	0.761787	0.588199	0.30896	0.168626	5.01733	3.62483	9.03777	20.2225	28.8727	5.86611	3.37967	25.2486	1.4842	1.35235	0	0.00197738	1.07086	0.238793	5.89331
TEMP 003-5			6.87554	77.0276	32.3541	25.1497	15.5248	6.91082	106.085	31.9609	NA	479.705	413.787	144.122	108.625	350.619	48.8175	46.9611	14.8541	7.49684	44.8438	11.2178	69.0229	446.746	126.373	350.619	47.8893	11.1755	398.682	3.6974	1.55303	1.20721	0.745204	0.331726	5.09219	1.53416	NA	23.0263	19.8622	6.91802	5.21409	16.8301	2.34329	2.25418	0.713012	0.359856	2.15255	0.538465	3.31317
TEMP 004-0	35	m	6.63	33.5984	10.5731	12.6823	9.42719	2.95483	35.4458	40.6423	NA	712.987	648.663	160.641	36.166	681.578	40.7663	42.9191	0	4.26034	18.9513	6.19101	38.044	680.825	98.4037	681.578	41.8427	2.13017	681.201	1.67248	0.526316	0.631308	0.469274	0.147088	1.76445	2.02312	NA	35.4916	32.2896	7.99652	1.8003	33.9281	2.02929	2.13646	0	0.212074	0.943369	0.308181	1.89378
TEMP 004-1			3.63375	53.253	NA	16.811	14.1906	20.4149	38.3442	23.4533	NA	353.901	NA	104.245	62.8512	235.552	26.0556	NA	4.09684	8.01718	35.032	17.3027	30.8988	353.901	83.5481	235.552	26.0556	6.05701	294.727	4.83667	NA	1.52685	1.28886	1.85417	3.48259	2.13013	NA	32.1429	NA	9.46799	5.70842	21.3939	2.36649	NA	0.372093	0.728155	3.18176	1.57151	2.80636
TEMP 004-2			2.145	13.8919	0	1.59894	9.34534	4.401	14.3539	4.35304	NA	113.674	93.0463	33.195	30.6196	117.749	7.22978	4.44367	0	0	5.16363	6.87317	9.35346	103.36	31.9073	117.749	5.83673	0	110.555	2.13744	0	0.246016	1.43789	0.677144	2.20851	0.669766	NA	17.4901	14.3162	5.10743	4.71118	18.1171	1.11239	0.68371	0	0	0.794484	1.05752	1.43914
TEMP 004-3			3.06	33.9205	10.5147	16.3836	16.4804	15.7695	35.7102	28.9186	5.39914	152.732	138.537	75.1603	41.832	211.262	26.042	28.885	23.6075	16.2056	20.2729	16.1249	23.3426	145.635	58.4962	211.262	27.4635	19.9065	178.448	3.65846	1.13405	1.76703	1.77748	1.7008	3.85149	3.11898	0.582319	16.4728	14.9418	8.10633	4.51175	22.7854	2.80873	3.11536	2.54616	1.74783	2.18651	1.73914	2.5176
TEMP 004-4			7.2675	39.6324	0.623458	5.1923	9.71593	19.9645	33.1042	56.5634	20.4083	445.197	705.242	219.647	30.6791	648.415	28.7718	37.0593	0.0666683	3.86127	15.1494	14.8402	36.6919	575.22	125.163	648.415	32.9156	1.96397	611.817	1.79979	0.0283126	0.235794	0.441221	0.906633	1.50333	2.56867	0.926784	20.2174	32.0266	9.97466	1.3932	29.4459	1.30659	1.68294	0.00302755	0.175349	0.687966	0.673927	1.66626
TEMP 004-5			5.215	112.72	28.0849	57.121	50.4827	60.6864	44.8547	72.6585	NA	403.702	NA	157.631	134.961	282.374	151.903	89.7484	39.6016	68.5967	65.9752	55.5845	58.7566	403.702	146.296	282.374	120.826	54.0992	343.038	7.1335	1.77736	3.61492	3.19481	3.84056	2.83865	4.59821	NA	25.5484	NA	9.9757	8.54104	17.8701	9.61326	5.67976	2.5062	4.34116	4.17526	3.51769	3.71843
TEMP 005-0	27	f	1.8225	19.7111	15.4827	8.95327	0.491515	0	23.482	4.29927	NA	162.169	203.114	83.7954	40.5241	124.759	20.9766	24.1737	0	0	14.7157	0.245758	13.8906	182.642	62.1597	124.759	22.5752	0	153.7	3.56945	2.80374	1.62133	0.0890076	0	4.2523	0.778547	NA	29.3669	36.7816	15.1743	7.33842	22.5923	3.79862	4.37756	0	0	2.66484	0.0445038	2.51543
TEMP 005-1			2.65303	18.9104	16.9666	7.07113	3.2992	0	30.1639	25.3738	NA	323.572	237.019	75.3269	39.3741	203.061	9.40112	4.80125	3.79208	2.06891	14.3161	1.6496	27.7688	280.296	57.3505	203.061	7.10119	2.9305	241.679	2.35243	2.11063	0.879639	0.410416	0	3.75235	3.15646	NA	40.252	29.4849	9.37056	4.89808	25.2606	1.16949	0.59727	0.47173	0.25737	1.7809	0.205208	3.4544
TEMP 005-2			2.565	26.5986	11.1422	13.8156	3.23409	4.92313	17.7503	23.7447	NA	218.158	130.64	99.6312	30.851	134.212	20.3692	12.7035	2.87207	0	17.1855	4.07861	20.7475	174.399	65.2411	134.212	16.5364	1.43604	154.305	3.42239	1.43364	1.77762	0.416124	0.633448	2.28389	3.05518	NA	28.0699	16.8091	12.8193	3.96953	17.2688	2.62086	1.63453	0.369543	0	2.21122	0.524786	2.66953
TEMP 005-3			10.2	96.2056	10.0922	47.9343	23.6875	9.14604	92.4128	59.3149	19.8257	447.632	435.338	263.159	141.29	434.599	99.3938	40.1342	0	5.56438	51.4107	16.4168	57.1844	441.485	202.224	434.599	69.764	2.78219	438.042	3.11285	0.326546	1.55097	0.766438	0.295931	2.99012	1.9192	0.641483	14.4837	14.0859	8.51482	4.5716	14.062	3.216	1.29859	0	0.180042	1.66345	0.531185	1.85027
TEMP 005-4			3.33857	32.5127	17.4992	0	0.973148	0	30.649	14.1333	NA	202.828	199.352	109.035	79.2472	223.631	31.0119	36.2413	0	0	16.6706	0.486574	22.3912	201.09	94.141	223.631	33.6266	0	212.36	3.21403	1.72987	0	0.0962001	0	3.0298	1.39714	NA	20.0505	19.7068	10.7786	7.83394	22.1069	3.06567	3.58262	0	0	1.64797	0.0481	2.21347
TEMP 005-5			4.455	55.5292	11.6528	12.1176	11.5935	11.2432	27.645	20.709	NA	451.246	306.936	184.504	76.3708	299.986	28.9944	45.1286	10.1178	4.38743	26.4332	11.4184	24.177	379.091	130.438	299.986	37.0615	7.25263	339.539	4.11369	0.86326	0.897693	0.858863	0.832916	2.04798	1.53415	NA	33.4289	22.7383	13.6683	5.65767	22.2234	2.14795	3.3432	0.749544	0.325027	1.95821	0.84589	1.79107
TEMP 006-0	25.5	m	8.535	24.1012	13.0503	6.62127	13.3941	7.26434	59.4631	73.3954	21.3476	1206.73	827.793	135.824	95.498	959.665	36.7215	41.7057	15.7752	0	14.5909	10.3292	51.402	1017.26	115.661	959.665	39.2136	7.88758	988.462	0.931948	0.504633	0.256033	0.517928	0.280899	2.29933	2.83807	0.825472	46.6619	32.0092	5.25206	3.69273	37.1085	1.41995	1.61268	0.609997	0	0.564204	0.399413	1.98762
TEMP 006-1			9.2775	66.8891	16.4931	23.6406	57.249	33.0764	105.327	20.3392	171.618	265.196	295.459	179.849	118.596	411.046	590.592	882.297	3.37364	6.63167	35.6743	45.1627	99.0948	280.328	149.223	411.046	736.445	5.00265	345.687	1.71513	0.721258	2.69881	4.18042	4.21437	3.03263	1.27049	0.40864	22.4152	10.9721	1.91039	2.98229	14.8486	29.7681	37.9456	0.498581	1.14186	1.71173	4.19739	1.57059
TEMP 006-2			9.0825	30.4819	1.64799	1.98327	5.72573	5.02221	65.9799	92.8792	50.8488	1370.85	1136.06	130.268	67.2508	1215.1	25.51	36.9065	0.0602887	0	11.3711	5.37397	69.9026	1253.46	98.7595	1215.1	31.2082	0.0301443	1234.28	1.10763	0.0598835	0.0720666	0.208057	0.182493	2.39753	3.37497	1.8477	49.8128	41.2815	4.73359	2.44371	44.1535	0.926962	1.34108	0.00219072	0	0.413193	0.195275	2.54007
TEMP 006-3			11.1	67.7119	6.05273	28.2487	3.14835	13.7764	82.7501	28.8514	NA	612.597	483.963	230.895	152.65	430.38	63.0059	38.9446	58.7058	0	34.0044	8.46238	55.8007	548.28	191.772	430.38	50.9752	29.3529	489.33	2.01326	0.179964	0.83991	0.0936091	0.40961	2.46038	0.857829	NA	18.2142	14.3895	6.86513	4.53868	12.7964	1.87333	1.15793	1.74548	0	1.01104	0.251609	1.65911
TEMP 006-4			6.585	48.107	2.1707	7.27728	13.7647	10.5347	38.447	35.5422	40.61	429.361	487.186	134.377	104.426	591.54	21.1226	19.8449	16.7342	0.142836	19.185	12.1497	38.1998	458.274	119.402	591.54	20.4837	8.43854	524.907	2.41107	0.108793	0.364729	0.689874	0.527989	1.92692	1.78134	2.03533	21.5191	24.4172	6.73482	5.23374	29.6473	1.05864	0.994604	0.838702	0.00715879	0.961531	0.608931	1.91453
TEMP 006-5			9.84	50.8287	40.5414	22.1819	14.2711	10.6502	35.0695	36.2453	NA	1161.71	617.052	170.962	66.2658	773.928	29.6123	27.8266	3.84482	0	37.8507	12.4607	35.6574	889.38	118.614	773.928	28.7195	1.92241	831.654	1.70479	1.35976	0.74398	0.478653	0.357207	1.17623	1.21566	NA	38.9636	20.6959	5.73406	2.22255	25.9575	0.993196	0.933303	0.128955	0	1.26951	0.41793	1.19595
TEMP 007-0	62	f	5.7225	43.913	8.88949	8.79337	0	0	154.208	60.2203	NA	573.057	433.622	104.107	42.366	404.026	14.9515	46.7287	8.2665	0	20.532	0	107.214	503.339	73.2365	404.026	30.8401	4.13325	453.683	2.53259	0.512682	0.507139	0	0	8.89362	3.47308	NA	33.0498	25.0082	6.00415	2.44337	23.3013	0.862293	2.69498	0.476753	0	1.18414	0	6.18335
TEMP 007-1			4.69071	25.069	0	3.57937	3.07815	2.71783	91.504	32.9921	52.441	466.501	411.256	76.4614	44.9746	306.027	15.1754	18.8789	4.08498	0.117407	9.54944	2.89799	58.979	438.878	60.718	306.027	17.0272	2.10119	372.453	1.76382	0	0.25184	0.216575	0.191223	6.43811	2.32129	3.68969	32.8224	28.9355	5.37973	3.16436	21.5317	1.06773	1.3283	0.287414	0.00826059	0.671887	0.203899	4.14969
TEMP 007-2			3.585	11.7285	9.58138	1.06404	12.1215	13.7405	66.0201	54.5274	NA	298.692	188.93	102.196	44.2289	196.924	24.3589	45.0635	0	0	7.45797	12.931	60.2738	243.811	73.2125	196.924	34.7112	0	220.368	1.07972	0.882056	0.0979546	1.11589	1.26495	6.07777	5.01976	NA	27.4974	17.3928	9.40812	4.07168	18.1287	2.24247	4.14852	0	0	0.686576	1.19042	5.54877
TEMP 007-3			7.13077	45.2097	0	0.165997	25.0822	2.0147	165.188	64.4342	62.3828	359.062	645.635	146.31	72.3638	420.38	31.9895	26.9742	4.65333	0.0338719	15.1252	13.5485	97.3351	502.349	109.337	420.38	29.4819	2.3436	461.364	2.09244	0	0.00768285	1.16088	0.0932463	7.6454	2.98221	2.88726	16.6184	29.8819	6.77167	3.34921	19.4564	1.48057	1.24845	0.21537	0.00156769	0.700041	0.627063	4.50495
TEMP 007-4			5.45068	24.4892	9.89803	13.0965	12.4737	5.88651	128.748	67.1568	118.324	343.939	407.556	146.147	66.1775	318.993	22.1887	42.326	5.20864	0	15.8279	9.18008	104.743	375.748	106.162	318.993	32.2574	2.60432	347.37	1.48279	0.599315	0.792978	0.755267	0.356422	7.79556	4.06627	7.1644	20.8252	24.6771	8.84905	4.00698	19.3147	1.3435	2.5628	0.315377	0	0.958362	0.555844	6.34208
TEMP 007-5			6.38464	27.7691	4.25679	15.4511	9.58015	4.833	117.804	71.5152	NA	490.277	477.672	116.434	77.5351	317.503	28.6344	13.1369	7.57915	8.82667	15.8256	7.20658	94.6595	483.974	96.9844	317.503	20.8857	8.20291	400.739	1.43543	0.220041	0.798693	0.495214	0.249826	6.08948	3.69674	NA	25.3432	24.6917	6.01866	4.00792	16.4123	1.48016	0.679067	0.391779	0.456265	0.818055	0.37252	4.89311
TEMP 008-0	55	f	3.1575	33.1466	NA	25.8659	4.29436	5.28819	0.741071	0	NA	253.186	NA	196.413	143.949	300.007	47.6047	NA	0	0	29.5062	4.79128	0.370535	253.186	170.181	300.007	47.6047	0	276.597	3.4646	NA	2.70359	0.448862	0.552741	0.0774593	0	NA	26.4639	NA	20.5298	15.0461	31.3578	4.97581	NA	0	0	3.0841	0.500801	0.0387297
TEMP 008-1			3.9075	51.8571	1.27515	10.8446	0	5.2761	49.3322	29.0843	NA	437.277	422.245	213.408	108.646	294.601	11.2594	40.8675	0.135404	0	21.3256	2.63805	39.2082	429.761	161.027	294.601	26.0635	0.067702	362.181	4.37992	0.107701	0.915948	0	0.445627	4.16667	2.4565	NA	36.933	35.6634	18.0247	9.1764	24.8825	0.950988	3.45173	0.0114364	0	1.80119	0.222814	3.31158
TEMP 008-2			3.9195	35.7347	8.91981	10.6669	12.4428	5.45476	44.8413	17.1993	NA	403.219	328.619	178.332	93.4372	342.735	30.9526	33.636	2.2986	2.48328	18.4405	8.94878	31.0203	365.919	135.885	342.735	32.2943	2.39094	354.327	3.00897	0.751073	0.898181	1.04772	0.459307	3.77577	1.44823	NA	33.9522	27.6706	15.0161	7.86768	28.8593	2.6063	2.83224	0.193548	0.209099	1.55274	0.753513	2.612
TEMP 008-3			3.39	167.185	90.9496	70.0287	104.49	54.2349	131.445	65.3206	224.277	271.416	395.288	283.708	240.455	434.877	82.7816	92.9652	103.788	94.2216	109.388	79.3625	140.348	333.352	262.081	434.877	87.8734	99.0048	384.115	17.424	10.8761	8.48742	8.29155	9.5446	10.2894	5.18385	NA	50.3562	39.6313	20.0028	20.4424	41.5086	12.2644	10.2797	7.44438	7.79192	12.2625	8.91808	7.73662
TEMP 008-4			3.855	41.995	5.33851	14.0816	0.439004	5.82914	20.5689	18.4836	4.98321	264.198	283.988	165.842	94.1896	320.145	14.7056	34.6835	9.67614	0.0333406	27.4584	5.87448	20.3872	269.259	139.11	320.062	28.6792	2.44926	294.66	3.59527	0.457038	1.20555	0.0375839	0.499043	1.76094	1.58241	0.426621	22.6184	24.3127	14.198	8.06373	27.4082	1.25897	2.96931	0.82839	0.00285434	2.35076	0.502924	1.74538
TEMP 008-5			7.36	89.9621	31.2028	20.1976	39.431	29.1887	46.1541	74.5661	15.8386	482.863	376.754	320.301	190.229	602.749	59.5607	36.9155	13.5025	9.43766	47.1208	34.3099	45.5196	429.808	255.265	602.749	48.2381	11.4701	516.279	5.48569	3.68828	1.4884	2.75737	2.22338	4.50684	3.86927	NA	31.949	28.6545	15.9824	15.058	30.2212	3.67055	0.825243	2.13046	1.63769	3.55412	2.49038	4.18806
TEMP 009-0	68	m	5.01	45.9036	12.9097	2.24614	8.49322	4.98949	58.4524	21.936	NA	232.165	219.704	193.309	107.013	287.721	22.1491	21.6444	8.61474	0.740141	20.3532	6.74135	40.1942	225.935	150.161	287.721	21.8967	4.67744	256.828	3.02389	0.850425	0.147964	0.559489	0.328682	3.85054	1.44503	NA	15.2939	14.473	12.7342	7.04946	18.9536	1.45907	1.42582	0.567495	0.0487567	1.34076	0.444086	2.64779
TEMP 009-1			4.9725	25.4939	2.56236	4.37088	0.392634	0	94.6941	7.4819	NA	207.122	252.952	133.048	71.6996	189.305	15.5696	7.52228	0	0	10.8091	0.196317	51.088	230.037	102.374	189.305	11.5459	0	209.671	1.69207	0.170068	0.290102	0.0260598	0	6.285	0.496586	NA	13.747	16.7888	8.83061	4.75882	12.5645	1.03338	0.499266	0	0	0.717415	0.0130299	3.39079
TEMP 009-2			7.1875	21.0775	7.55529	4.58953	0	0	52.2455	27.3096	NA	497.786	NA	198.76	79.4384	404.659	34.6316	29.4065	18.5801	0	11.0741	0	39.7775	497.786	139.099	404.659	32.0191	9.29005	451.222	0.967829	0.346921	0.21074	0	0	2.39899	1.25399	NA	22.8571	NA	9.12657	3.64763	18.581	1.5902	1.35028	0.853154	0	0.508497	0	1.82649
TEMP 009-3			NaN	29.9246	0	3.28845	13.543	13.8339	27.4013	77.3918	15.781	599.041	751.093	106.608	51.3795	669.937	11.3678	17.5349	5.56815	8.66347	11.071	13.6885	40.1914	675.067	78.9936	669.937	14.4513	7.11581	672.502	1.11874	1.27451	0.240398	0.531242	0.00707764	3.58275	2.706	NA	42.4873	32.2088	5.69311	1.77499	32.1248	0.782927	0.198708	0	0	NaN	NaN	NaN
TEMP 009-4			8.60192	47.6959	4.53481	5.6701	4.82136	9.36683	35.8195	38.1879	29.9093	310.236	343.854	315.161	137.47	403.85	8.37942	37.3049	8.09547	8.90149	19.3003	7.09409	34.6389	327.045	226.315	403.85	22.8422	8.49848	365.447	1.82996	0.173989	0.217547	0.184983	0.35938	1.3743	1.46517	1.14754	11.9029	13.1928	12.0919	5.27437	15.4946	0.321496	1.43129	0.310602	0.341527	0.7405	0.272182	1.329
TEMP 009-5			4.79036	25.8312	6.84391	19.8056	8.02243	4.57447	21.9847	22.2572	NA	311.496	132.259	144.125	77.1305	197.63	20.8778	38.4719	26.767	10.1664	17.4936	6.29845	22.121	221.878	110.628	197.63	29.6749	18.4667	209.754	1.77965	0.471513	1.36451	0.552707	0.315159	1.51464	1.53342	NA	21.4606	9.11201	9.92954	5.31392	13.6158	1.43838	2.65053	1.84412	0.700418	1.20523	0.433933	1.52403
TEMP 010-0	50	m	4.085	22.8745	9.10114	10.2835	8.2286	7.66346	112.895	28.0134	NA	384.89	244.582	158.571	33.7999	225.746	24.9634	34.6225	8.37382	0.292613	14.0864	7.94603	70.4542	314.736	96.1856	225.746	29.793	4.33322	270.241	1.84806	0.735294	0.830821	0.664801	0.619142	9.12095	2.26324	NA	31.0958	19.7601	12.8112	2.73074	18.2383	2.01683	2.7972	0.676533	0.0236407	1.13806	0.641971	5.6921
TEMP 010-1			3.92	27.2794	0.952876	1.39021	13.4729	7.15339	42.8927	46.9798	NA	490.898	423.484	85.1441	41.2095	394.302	12.9515	19.2165	4.68276	5.25147	9.87417	10.3131	44.9362	457.191	63.1768	394.302	16.084	4.96712	425.747	2.29671	0.0802246	0.117045	1.13431	0.602258	3.61123	3.95533	NA	41.3298	35.654	7.16846	3.46951	33.1971	1.09042	1.61787	0.394252	0.442133	0.831327	0.868284	3.78328
TEMP 010-3			7.8	68.2691	0	12.3909	33.5658	16.565	41.6917	87.9019	NA	771.896	415.72	55.1948	64.4261	829.402	95.0159	54.3831	15.0085	0	26.8867	25.0654	64.7968	593.808	59.8105	829.402	74.6995	7.50426	711.605	2.8886	0	0.524283	1.42023	0.700895	1.76406	3.7193	NA	32.6604	17.5899	2.3354	2.72599	35.0936	4.0203	2.30105	0.635039	0	1.13763	1.06056	2.74168
TEMP 010-4			3.99237	14.483	NA	14.8959	12.9501	0	66.0075	39.1319	NA	328.863	NA	74.1021	36.0991	291.394	15.7083	17.3048	0	0	14.6895	6.47503	52.5697	328.863	55.1006	291.394	16.5066	0	310.128	1.19725	NA	1.23139	1.07053	0	5.45657	3.23488	NA	27.1858	NA	6.12572	2.98417	24.0883	1.29854	1.43052	0	0	1.21432	0.535264	4.34573
TEMP 010-5			6.29	54.4279	27.852	16.7447	29.6102	14.5918	161.605	50.2028	NA	868.295	712.333	117.819	74.616	643.67	21.3985	46.7878	16.7009	30.5585	33.0082	22.101	105.904	790.314	96.2175	643.67	34.0931	23.6297	716.992	2.8558	1.46138	0.878587	1.55363	0.765622	8.47933	2.63412	NA	45.559	37.3757	6.1819	3.91506	33.773	1.12277	2.45493	0.876289	1.60339	1.73192	1.15963	5.55672
TEMP 013-0	30	f	4.0875	46.2636	6.54328	8.42165	19.9589	4.89105	67.9864	29.3026	NA	239.627	219.069	75.654	104.605	203.627	29.3155	22.9686	2.81267	2.34596	20.4095	12.425	48.6445	229.348	90.1293	203.627	26.1421	2.57932	216.487	3.73542	0.528318	0.679981	1.61152	0.394913	5.48936	2.36595	NA	19.348	17.6881	6.10845	8.446	16.4412	2.36699	1.85453	0.227101	0.189418	1.64791	1.00322	3.92766
TEMP 013-1			5.7375	29.1496	5.70563	6.0114	8.9295	0	43.6204	17.3653	NA	502.587	315.341	192.22	74.9439	259.904	14.642	31.7357	7.99509	6.81013	13.6222	4.46475	30.4929	408.964	133.582	259.904	23.1889	7.40261	334.434	1.67675	0.3282	0.345788	0.513644	0	2.50914	0.99889	NA	28.9099	18.1391	11.0569	4.31093	14.9502	0.842239	1.8255	0.459894	0.391733	0.783579	0.256822	1.75401
TEMP 013-2			4.35	269.153	102.306	124.492	120.68	68.4329	339.013	277.328	90.6287	424.411	554.234	185.167	244.256	804.584	335.734	83.4567	118.938	210.693	165.317	94.5564	235.657	489.323	214.712	804.584	209.596	164.816	646.953	18.8612	7.6498	8.74411	7.54689	5.91676	33.1213	19.3204	NA	50.6251	39.4556	15.7	15.1596	61.127	27.1515	7.09964	11.5148	16.2429	11.7517	6.73182	26.2208
TEMP 013-3			6.015	41.8825	4.7493	12.0969	16.1837	10.3047	35.2701	22.5763	NA	391.089	231.997	148.875	90.8884	325.361	12.6094	17.2699	3.43125	0	19.5762	13.2442	28.9232	311.543	119.881	325.361	14.9396	1.71562	318.452	2.29803	0.260586	0.663735	0.887973	0.565399	1.93521	1.23873	NA	21.4584	12.7293	8.1685	4.9869	17.852	0.691857	0.947568	0.188267	0	1.07412	0.726686	1.58697
TEMP 013-4			5.37563	35.8626	14.267	15.7978	7.9447	2.73796	22.8811	7.43208	NA	280.363	189.413	201.1	108.684	284.787	18.1652	43.6716	0	1.73247	21.9758	5.34133	15.1566	234.888	154.892	284.787	30.9184	0.866237	259.837	2.20176	0.875912	0.969897	0.48776	0.168095	1.40477	0.456288	NA	17.2127	11.6289	12.3464	6.67261	17.4843	1.11524	2.68119	0	0.106364	1.34919	0.327928	0.930529
TEMP 013-5			6.64019	32.4903	0.815046	3.06026	8.58916	1.34841	12.8383	23.5013	5.43105	257.753	301.725	199.82	102.886	387.814	35.2661	18.6808	3.93981	0.119945	12.1219	4.96879	13.9235	279.739	151.353	387.814	26.9734	2.02988	333.777	1.61484	0.0405097	0.152102	0.426901	0.0670192	0.638092	1.16807	0.269936	12.8109	14.9964	9.93151	5.11367	19.2753	1.75281	0.928477	0.195818	0.00596154	0.602485	0.24696	0.692033
TEMP 014-0	23	f	3.9175	8.54984	0	3.00376	1.36226	2.11538	50.2158	16.8955	NA	242.945	110.783	105.463	52.9225	188.062	3.98503	4.90159	1.92291	0	3.8512	1.73882	33.5557	176.864	79.1929	188.062	4.44331	0.961456	182.463	0.720288	0	0.253055	0.114765	0.178212	4.23047	1.42338	NA	20.4671	9.33301	8.88484	4.4585	15.8435	0.335722	0.412939	0.161997	0	0.324448	0.146489	2.82692
TEMP 014-1			3.7775	33.0665	0	0.805386	1.77942	0	47.3582	35.0171	NA	557.406	390.402	42.7218	36.7677	443.583	13.237	12.2488	3.44261	0	11.2906	0.88971	41.1876	473.904	39.7448	443.583	12.7429	1.72131	458.744	2.88896	0	0.0703651	0.155465	0	4.1376	3.05938	NA	48.6995	34.1087	3.73252	3.21233	38.755	1.15649	1.07015	0.300774	0	0.986441	0.0777323	3.59849
TEMP 014-2			6.54	44.3913	0	34.6608	48.1989	6.58976	25.3671	32.7968	NA	775.447	602.981	173.137	98.4886	514.476	21.1675	29.0685	20.2691	25.6335	26.3507	27.3943	29.082	689.214	135.813	514.476	25.118	22.9513	601.845	2.24015	0	1.74912	2.4323	0.332544	1.28012	1.65505	NA	39.132	30.4287	8.73714	4.9701	25.9624	1.06819	1.46691	1.02285	1.29356	1.32976	1.38242	1.46759
TEMP 014-3			4.6175	54.218	6.28528	6.38382	11.5598	8.35791	21.425	12.0128	1.04645	141.573	280.801	161.939	37.1161	248.615	18.9886	25.1428	0	0	22.2957	9.95884	11.4948	211.187	99.5275	248.615	22.0657	0	229.901	3.8752	0.449236	0.456279	0.826228	0.597377	1.53134	0.858609	0.0747943	10.1189	20.0701	11.5745	2.65285	17.7696	1.3572	1.79707	0	0	1.59357	0.711802	0.821581
TEMP 014-4			4.8475	93.0295	1.88488	22.9829	8.14864	26.2177	19.4309	4.7885	NA	361.834	134.266	151.882	98.0529	244.142	50.2332	0.681258	0.198794	0	39.2991	17.1831	12.1097	248.05	124.967	244.142	25.4572	0.0993972	246.096	6.33374	0.128329	1.56475	0.554785	1.78498	1.32292	0.326016	NA	24.6348	9.14127	10.3406	6.67575	16.6219	3.42003	0.0463822	0.0135345	0	2.67561	1.16988	0.824468
TEMP 014-5			4.26295	25.7867	0.115452	7.75876	31.4582	18.8939	0.0248586	46.921	29.0958	229.451	262.69	309.624	83.6742	237.576	32.8946	66.9875	0	0.0667463	11.2203	25.176	25.3472	246.071	196.649	237.576	49.9411	0.0333732	241.823	1.99638	0.00893815	0.600674	2.43546	1.46274	0.00192452	3.63257	2.25256	17.7639	20.3372	23.9707	6.47796	18.3929	2.54666	5.18609	0	0.00516742	0.868663	1.9491	1.96235
TEMP 015-0	32	f	3.165	18.9234	4.25472	9.48122	9.96487	2.8409	8.72351	15.1931	6.72979	281.68	212.18	60.5655	17.9481	230.165	22.4138	26.4798	0.107015	0.202175	10.8864	6.40289	10.2155	246.93	39.2568	230.165	24.4468	0.154595	238.547	1.97325	0.443665	0.988662	1.0391	0.296237	0.909652	1.58427	0.701754	29.3724	22.1252	6.31552	1.87155	24.0006	2.33722	2.7612	0.0111591	0.0210819	1.13519	0.667666	1.06523
TEMP 015-1			4.4325	52.3513	13.7513	7.20293	9.50013	9.35283	29.4154	8.85928	8.78527	260.338	233.745	150.949	91.5596	195.142	13.0153	26.6413	2.5678	2.04298	24.4352	9.42648	15.6866	247.041	121.254	195.142	19.8283	2.30539	221.092	3.89795	1.02389	0.536312	0.707357	0.696389	2.1902	0.65964	0.654129	19.3841	17.4041	11.2393	6.8173	14.5298	0.969088	1.98365	0.191192	0.152115	1.81938	0.701873	1.16799
TEMP 015-2			4.56	44.7961	17.8947	16.2805	25.2911	0.0377457	57.8221	63.0089	28.3907	267.086	326.027	166.69	111.389	359.145	36.0319	22.3765	0	0	26.3238	12.6644	49.7406	296.556	139.04	359.145	29.2042	0	327.851	3.24215	1.29514	1.17831	1.83046	0.00273187	4.18491	4.56031	2.05479	19.3305	23.5964	12.0643	8.06188	25.9934	2.60784	1.61951	0	0	1.9052	0.916596	3.60001
TEMP 015-3			3.905	51.5761	33.1227	16.8564	2.80141	16.38	50.2662	19.3046	64.359	222.104	233.184	128.581	106.07	274.361	28.4866	43.3657	18.4023	19.1352	33.8517	9.59072	44.6433	227.644	117.325	274.361	35.9261	18.7688	251.003	4.35898	2.79938	1.42462	0.236763	1.38437	4.24828	1.63154	5.43933	18.7713	19.7076	10.8671	8.96453	23.1878	2.40756	3.66507	1.55528	1.61722	2.861	0.810565	3.77305
TEMP 015-4			5.175	51.8775	15.4352	21.0805	12.7249	21.9086	73.6189	73.7926	198.449	603.507	489.271	150.973	73.365	355.379	40.8272	38.5108	15.0687	9.34599	29.4644	17.3167	115.287	546.389	112.169	355.379	39.669	12.2074	450.884	3.30846	0.984375	1.3444	0.811523	1.39721	4.69501	4.70608	12.656	38.4884	31.203	9.62821	4.67881	22.6641	2.60373	2.456	0.961002	0.596036	1.87908	1.10437	7.35235
TEMP 015-5			3.58342	58.5827	1.67688	7.03214	10.9159	10.6384	66.3127	33.7456	NA	330.002	230.406	135.904	83.078	264.087	29.7512	17.3766	3.41908	9.08514	22.4306	10.7771	50.0292	280.204	109.491	264.087	23.5639	6.25211	272.146	5.39546	0.15444	0.64766	1.00535	0.979794	6.1074	3.10797	NA	30.3932	21.2204	12.5168	7.65148	24.3224	2.74008	1.60038	0.314898	0.836741	2.06585	0.992573	4.60769
TEMP 016-0	21	f	4.71	27.796	5.59659	8.37036	11.964	4.29883	70.3189	17.2881	7.34012	280.967	228.7	92.1563	60.1911	239.908	23.5821	28.0734	3.78903	0.74225	13.921	8.13142	31.649	254.834	76.1737	239.908	25.8277	2.26564	247.371	1.94769	0.392157	0.586517	0.838326	0.301222	4.92729	1.21139	0.514328	19.6876	16.0252	6.45746	4.21763	16.8105	1.65241	1.96712	0.2655	0.05201	0.975454	0.569774	2.21767
TEMP 016-1			3.35614	21.3639	12.2635	7.95286	17.2522	3.10265	7.16941	26.0041	NA	278.239	206.99	159.025	64.3399	177.218	16.801	15.4996	0	1.49697	13.8601	10.1774	16.5868	242.615	111.683	177.218	16.1503	0.748487	209.917	2.10087	1.20596	0.782062	1.69653	0.305106	0.70502	2.55717	NA	27.3613	20.3548	15.6381	6.327	17.4272	1.65216	1.52419	0	0.147208	1.36296	1.00082	1.6311
TEMP 016-2			5.4	61.5434	3.69266	18.0326	6.54321	9.04887	24.687	17.8078	28.9538	334.551	443.9	95.8188	87.025	457.599	16.179	43.7893	9.36429	0	27.7562	7.79604	23.8162	389.225	91.4219	457.599	29.9842	4.68215	423.412	3.76136	0.225685	1.1021	0.399903	0.553042	1.5088	1.08837	1.76958	20.4468	27.1299	5.85618	5.31873	27.9672	0.988817	2.67628	0.572319	0	1.69638	0.476472	1.45558
TEMP 016-3			6.13607	39.9123	5.70386	9.99024	7.78886	4.09726	27.5858	25.2396	47.7967	132.606	263.494	88.3337	38.8177	367.512	6.78695	13.7917	2.90163	9.83289	18.5355	5.94306	33.5407	198.05	63.5757	367.512	10.2893	6.36726	282.781	2.14671	0.306786	0.537332	0.418929	0.220374	1.48372	1.35753	2.57078	7.13232	14.1722	4.75109	2.08784	19.7669	0.365041	0.741795	0.156066	0.528869	0.996944	0.319652	1.80401
TEMP 016-4			5.39143	61.5493	21.3849	9.6672	26.1569	20.8471	52.8584	20.1043	NA	286.946	139.113	59.5418	72.3167	245.549	61.6961	63.9193	5.62527	1.52384	30.8671	23.502	36.4813	213.029	65.9292	245.549	62.8077	3.57455	229.289	3.7677	1.30906	0.591772	1.60118	1.27614	3.23569	1.23067	NA	17.5652	8.51569	3.64481	4.42682	15.0312	3.77669	3.91278	0.344347	0.0932807	1.88951	1.43866	2.23318
TEMP 017-0	49	f	1.67692	37.0261	1.5891	0.0150203	10.5786	0.45515	24.7261	28.9375	24.9231	192.261	280.767	259.885	66.4244	280.408	14.8728	22.5482	3.36983	0.0388063	12.8767	5.51687	26.1956	236.514	163.155	280.408	18.7105	1.70432	258.461	2.3718	0.860404	0.184092	0.353626	0.143856	4.51962	2.62007	3.64675	13.3468	22.813	15.249	4.89726	19.3646	1.1686	2.27261	0.00786065	0	1.13877	0.248741	3.59548
TEMP 017-1			4.695	32.422	NA	5.9355	16.4362	12.6937	119.025	59.886	NA	351.971	NA	187.851	60.9127	297.234	51.0104	NA	12.8438	0	19.1788	14.565	89.4554	351.971	124.382	297.234	51.0104	6.42188	324.603	2.27909	NA	0.417234	1.15538	0.892296	8.3668	4.20966	NA	24.7417	NA	13.2049	4.28183	20.8939	3.58575	NA	0.902846	0	1.34816	1.02384	6.28823
TEMP 017-2			9.375	74.7471	21.2421	18.1395	12.5877	9.09347	107.133	49.3575	39.2421	838.074	553.044	443.438	145.244	606.925	41.3418	26.7428	11.9553	8.52723	38.0429	10.8406	65.2441	695.559	294.341	606.925	34.0423	10.2413	651.242	2.63136	0.747795	0.638575	0.443131	0.320122	3.77145	1.73756	1.38146	29.5032	19.4691	15.6106	5.11312	21.3659	1.45538	0.941441	0.420868	0.300188	1.33924	0.381627	2.29682
TEMP 017-3			4.2	36.9563	10.0263	3.3487	2.44937	4.85078	11.2014	5.53884	27.1698	234.026	129.779	219.361	95.0742	171.46	16.8217	16.4374	1.30086	3.81292	16.7771	3.65008	14.6367	181.902	157.217	171.46	16.6295	2.55689	176.681	2.904	0.787859	0.263139	0.19247	0.381171	0.8802	0.435238	2.13499	18.3896	10.1979	17.2372	7.47086	13.4732	1.32183	1.29164	0.102221	0.299616	1.31833	0.28682	1.15014
TEMP 017-4			7.695	57.5389	12.3614	13.2648	5.05303	11.6882	36.6771	23.7543	NA	458.682	370.645	282.272	93.5727	303.795	27.7698	21.9961	2.73298	0	27.7217	8.37064	30.2157	414.663	187.922	303.795	24.883	1.36649	359.229	2.4678	0.530173	0.56892	0.216721	0.5013	1.57306	1.0188	NA	19.6725	15.8967	12.1064	4.01327	13.0295	1.19103	0.943396	0.117216	0	1.18896	0.359011	1.29593
TEMP 017-5			9.015	111.496	28.9129	21.1476	10.2925	7.05176	89.897	35.3443	56.5472	736.657	447.718	479.949	165.526	515.099	58.4503	20.9587	11.4696	9.66661	53.8522	8.67215	60.5962	592.187	322.738	515.099	39.7045	10.5681	553.643	4.08179	1.05848	0.774201	0.376803	0.25816	3.29107	1.29393	2.07016	26.9685	16.3907	17.5706	6.0598	18.8574	2.13982	0.767284	0.419894	0.353888	1.97149	0.317482	2.21838
[truncated: 41 more columns]

## Sheet: Vaccination cohort Fig 3
related to figure 3
1	sample type			*responder/non responder/immuned defenition is explained in the methods section					cfDNA	cfDNA	cfDNA	cfDNA	cfDNA	cfDNA	cfDNA	cfDNA	cfDNA	cfDNA	cfDNA	cfDNA	cfDNA	cfDNA	cfDNA	cfDNA	cfDNA	cfDNA	cfDNA	cfDNA	cfDNA	cfDNA	cfDNA	cfDNA	cfDNA	cfDNA	cfDNA	cfDNA	cfDNA	cfDNA	cfDNA	cfDNA	cfDNA	cfDNA	cfDNA	cfDNA	cfDNA	cfDNA	cfDNA	cfDNA	cfDNA
2	units								ng/ml	GE/ml	GE/ml	GE/ml	GE/ml	GE/ml	GE/ml	GE/ml	GE/ml	GE/ml	GE/ml	GE/ml	GE/ml	GE/ml	GE/ml	GE/ml	GE/ml	GE/ml	GE/ml	GE/ml	GE/ml	GE/ml	GE/ml	GE/ml	GE/ml	GE/ml	%	%	%	%	%	%	%	%	%	%	%	%	%	%	%
3	cell type									B cells	B cells	B cells	CD8	CD8	Eosinophils	Eosinophils	Eosinophils	Granulocytes	Granulocytes	Monocytes	Monocytes	Neutrophils	T cell	T cell	Tregs	Tregs	B cells	CD8	Eosinophils	Granulocytes	Monocytes	Neutrophils	T cell	Tregs	B cells	B cells	B cells	CD8	CD8	Eosinophils	Eosinophils	Eosinophils	Granulocytes	Granulocytes	Monocytes	Monocytes	Neutrophils	T cell	T cell
4		age	gender	year of vaccination	responder/ non responder*	Visit ID	Acute disease	tube type/color	Total cfDNA	BCELL3	BCELL1	BCELL2	CD8A	CD8B	EOSI3	EOSI2	EOSI1	NEUT2	NEUT1	MONO1	MONO2	NEUT3	TCELL1	TCELL2	TREG1	TREG2	average	average	average	average	average	average	average	average	BCELL3	BCELL1	BCELL2	CD8A	CD8B	EOSI3	EOSI2	EOSI1	NEUT2	NEUT1	MONO1	MONO2	NEUT3	TCELL1	TCELL2
5	PS 003	26	f	2018		Base line			3.195	17.5862	7.51248	8.70725	4.31749	4.39269	3.33933	14.4974	2.88808	125.77	98.985	117.067	62.8992	144.777	14.5713	15.4143	2.25469	0	11.2686	4.35509	6.90829	112.377	89.9829	144.777	14.9928	1.12735	1.81659	0.776014	0.89943	0.445982	0.453751	0.344942	1.49754	0.298329	12.9916	10.2248	12.0926	6.49728	14.9549	1.50517	1.59224
6	PS 003.2					Day0			2.37	13.7076	7.4499	1.57184	0	0.0115113	3.03399	30.9378	6.94356	98.0329	131.451	47.7135	26.876	192.537	6.50325	14.4709	2.24905	0	7.57646	0.00575566	13.6385	114.742	37.2948	192.537	10.4871	1.12452	1.90885	1.03743	0.218886	0	0.001603	0.422497	4.30823	0.966921	13.6515	18.3052	6.64432	3.74261	26.8117	0.905606	2.01513
7	PS 003.3					Day3			2.355	23.0406	NA	6.79586	0	0.9544	8.02918	8.83841	NA	58.3595	49.0398	112.685	44.8592	89.7267	10.5822	12.4071	3.68048	0.0133431	14.9182	0.4772	8.43379	53.6996	78.772	89.7267	11.4947	1.84691	3.22894	NA	0.952381	0	0.133751	1.12522	1.23863	NA	8.17858	6.87251	15.7918	6.28663	12.5744	1.48301	1.73874
8	PS 003.4					Day7			2.295	63.7611	20.1256	16.3193	0	0.482739	12.8895	11.6011	NA	124.471	73.0972	54.9284	31.6418	94.7971	7.65361	17.8439	0.0781661	0	33.402	0.241369	12.2453	98.7841	43.2851	94.7971	12.7488	0.039083	9.16919	2.89417	2.34681	0	0.0694203	1.85358	1.6683	NA	17.8996	10.5118	7.89899	4.55026	13.6323	1.10063	2.56605
9	PS 003.5					Day28			2.055	16.9528	1.41322	3.80577	0	1.35076	0	10.4167	9.90322	47.6698	77.2062	78.9313	62.762	107.714	5.58961	0.112394	2.25954	0	7.3906	0.675382	6.77331	62.438	70.8466	107.714	2.851	1.12977	2.72262	0.226963	0.611207	0	0.216933	0	1.67293	1.59046	7.65576	12.3993	12.6764	10.0796	17.2989	0.897692	0.0180505
10	PS 004	51	m	2018		Base line			4.34	12.3111	1.49519	0.927715	0	0.0326875	18.0552	22.7195	47.5308	226.741	354.395	153.148	55.0391	254.236	11.755	2.0709	0	0	4.91132	0.0163438	29.4352	290.568	104.094	254.236	6.91293	0	0.936187	0.113701	0.0705476	0	0.00248571	1.373	1.72769	3.61446	17.2424	26.9498	11.6461	4.18542	19.3332	0.8939	0.15748
11	PS 004.2					Day0			5.52	18.4332	0	5.3209	2.94448	2.58621	64.0833	44.9044	21.6653	297.176	399.516	143.484	48.7073	395.004	11.5715	25.5493	4.64242	0	7.91804	2.76534	43.551	348.346	96.0958	395.004	18.5604	2.32121	1.1021	0	0.318129	0.176046	0.154626	3.83145	2.68477	1.29534	17.7677	23.8865	8.57872	2.91214	23.6167	0.691846	1.52756
12	PS 004.3					Day3			6.05455	43.9222	3.46078	5.74456	1.20113	1.79165	52.0824	13.582	15.088	310.694	373.38	226.073	75.2359	373.25	10.7761	13.6204	0	0	17.7092	1.49639	26.9175	342.037	150.654	373.25	12.1983	0	2.3942	0.188647	0.313136	0.0654736	0.0976626	2.83901	0.740355	0.822448	16.9359	20.3529	12.3232	4.10111	20.3458	0.587407	0.742448
13	PS 004.4					Day7			5.94	46.9563	15.0485	6.53839	2.46216	3.45256	79.0425	59.2052	83.6357	289.749	422.382	210.274	88.2929	443.537	17.6985	28.3488	0	0	22.8477	2.95736	73.9611	356.066	149.284	443.537	23.0236	0	2.60894	0.836109	0.36328	0.136801	0.191828	4.39169	3.28951	4.64689	16.0988	23.468	11.6831	4.90565	24.6434	0.983346	1.57509
14	PS 004.5					Day28			4.38947	16.9963	0	3.5082	4.27761	4.13948	60.6807	27.2152	52.3168	207.361	314.81	137.533	71.0389	262.222	12.8213	27.8428	0	0	6.83483	4.20855	46.7376	261.086	104.286	262.222	20.332	0	1.27791	0	0.263772	0.321622	0.311237	4.56242	2.04624	3.93357	15.5909	23.6698	10.3407	5.34123	19.7158	0.963999	2.09343
15	PS 005	34	m	2018		Base line			3.312	25.1305	5.93477	2.58849	3.14096	0.015161	43.4312	38.058	22.493	111.988	183.138	83.364	53.6112	94.0459	3.38553	18.5268	1.16498	0	11.2179	1.57806	34.6608	147.563	68.4876	94.0459	10.9562	0.582489	2.5042	0.591386	0.257937	0.312989	0.00151076	4.32782	3.79239	2.24138	11.1593	18.2493	8.30703	5.34223	9.37145	0.33736	1.84615
16	PS 005.2					Day0			4.72	22.1459	1.35606	0.0297065	0	0	76.61	51.041	106.483	465.68	577.165	116.359	38.5968	497.99	17.3139	15.301	0.116772	0	7.8439	0	78.0446	521.423	77.4778	497.99	16.3075	0.0583858	1.54849	0.0948188	0.00207714	0	0	5.35674	3.5689	7.44552	32.5614	40.3567	8.13606	2.69878	34.8206	1.21063	1.06988
17	PS 005.3					Day3			3.24	69.606	27.416	10.818	8.09945	2.24107	52.6606	10.2486	43.7162	92.8227	142.485	145.09	68.5683	138.874	8.41938	20.8927	0	0	35.9467	5.17026	35.5418	117.654	106.829	138.874	14.656	0	7.09021	2.79265	1.10194	0.825027	0.22828	5.36412	1.04394	4.45302	9.45511	14.5138	14.7792	6.98451	14.146	0.857616	2.12817
18	PS 005.4					Day7			5.775	25.0435	17.5177	1.46755	7.44789	3.013	155.948	63.3783	NA	612.755	530.972	147.673	38.4526	385.773	17.2597	42.729	0	0	14.6763	5.23044	109.663	571.863	93.0627	385.773	29.9943	0	1.4312	1.00111	0.0838686	0.425636	0.172189	8.9122	3.62198	NA	35.0181	30.3443	8.43929	2.19751	22.0464	0.986368	2.4419
19	PS 005.5					Day28			5.05	38.0359	5.57611	9.5758	3.68785	3.44358	131.35	67.9166	201.692	321.915	450.462	125.562	37.5361	343.61	11.4094	21.1389	0	0	17.7293	3.56571	133.653	386.188	81.5492	343.61	16.2742	0	2.48576	0.364416	0.625808	0.241012	0.225048	8.58414	4.43856	13.1812	21.0381	29.4391	8.20589	2.4531	22.456	0.745642	1.38149
20	PS 007	47	f	2018		Base line			2.96	35.9391	9.91941	0.0452752	0.500243	0	3.04027	7.29606	36.528	171.947	154.646	70.2701	57.3315	153.273	5.23732	11.955	0	3.95087	15.3013	0.250121	15.6215	163.296	63.8008	153.273	8.59618	1.97544	4.00713	1.10599	0.00504808	0.0557759	0	0.338983	0.813494	4.07279	19.1716	17.2426	7.83495	6.39233	17.0896	0.583949	1.33296
21	PS 007.2					Day0			2.81143	26.4632	5.25656	6.61865	10.0818	2.19984	9.34873	16.5912	22.0926	131.742	167.506	67.5297	46.9026	158.93	6.0147	6.8233	1.73912	0	12.7795	6.14081	16.0108	149.624	57.2161	158.93	6.419	0.869561	3.10651	0.617066	0.776962	1.1835	0.258238	1.09745	1.94763	2.59344	15.4651	19.6635	7.92729	5.50589	18.6568	0.706065	0.800986
22	PS 007.3					Day3			3.10286	9.52448	0	7.84967	2.68277	1.86484	23.8827	16.4375	12.1933	101.848	132.337	76.2326	55.2462	159.316	21.8643	41.5476	3.52535	0	5.79138	2.2738	17.5045	117.093	65.7394	159.316	31.706	1.76268	1.01306	0	0.834924	0.28535	0.198352	2.54026	1.74836	1.29693	10.833	14.0759	8.10842	5.87622	16.9456	2.32558	4.41918
23	PS 007.4					Day7			3.375	49.3561	10.2556	6.87137	1.53885	4.74453	19.47	21.9951	4.23141	166.285	157.625	74.9937	54.495	161.475	15.6126	18.8236	1.66986	0	22.161	3.14169	15.2322	161.955	64.7444	161.475	17.2181	0.834931	4.82641	1.00287	0.671934	0.150481	0.463956	1.90393	2.15084	0.413779	16.2606	15.4137	7.33345	5.32894	15.7903	1.52672	1.84071
24	PS 007.5					Day28			3.225	26.022	8.18896	5.58954	0	3.89284	12.7167	14.0058	17.4107	155.608	189.757	57.323	53.3836	143.558	17.4999	4.57926	0.0329915	0	13.2668	1.94642	14.7111	172.682	55.3533	143.558	11.0396	0.0164957	2.66299	0.838024	0.57201	0	0.398377	1.30138	1.4333	1.78174	15.9243	19.4189	5.8662	5.46305	14.6912	1.79087	0.468623
25	PS 055	33	m	2018		Base line			6.14	23.7012	5.21962	5.95054	26.72	9.14517	75.2861	48.6635	87.1523	371.451	546.73	277.595	61.9771	443.028	47.098	44.6479	0	0	11.6238	17.9326	70.3673	459.09	169.786	443.028	45.8729	0	1.27397	0.280561	0.319849	1.43624	0.491565	4.04673	2.61573	4.68455	19.966	29.3874	14.9211	3.33135	23.8134	2.53158	2.39988
26	PS 055.2					Day0			5.34545	22.5458	5.90653	6.01514	8.339	7.41912	106.818	57.6539	110.646	378.064	616.345	213.876	34.317	562.765	22.2207	25.1963	0	0	11.4891	7.87906	91.7059	497.205	124.097	562.765	23.7085	0	1.39199	0.364674	0.37138	0.514857	0.458063	6.59501	3.5596	6.8314	23.342	38.0537	13.2049	2.11876	34.7456	1.37192	1.55564
27	PS 055.3					Day3			7.8	22.0883	12.4869	5.74744	4.65056	13.4784	87.7723	75.4562	100.16	551.174	807.078	307.375	69.1939	877.129	35.3259	35.4085	0	0	13.4409	9.06449	87.7961	679.126	188.284	877.129	35.3672	0	0.934599	0.528346	0.243185	0.196774	0.570298	3.71382	3.1927	4.23795	23.3212	34.149	13.0056	2.92773	37.113	1.49471	1.4982
28	PS 055.4					Day7			5.43	34.7421	10.4363	5.75229	4.12174	3.33019	101.138	46.1206	84.564	382.047	414.554	254.171	59.8824	448.88	14.4335	53.3115	2.23483	6.7151	16.9769	3.72597	77.274	398.3	157.027	448.88	33.8725	4.47496	2.11161	0.634313	0.349622	0.250518	0.202408	6.1471	2.80319	5.13977	23.2207	25.1964	15.4484	3.63963	27.2827	0.877263	3.24025
29	PS 055.5					Day28			8.175	42.0379	5.63269	9.69506	9.1493	11.7177	159.013	103.719	175.221	659.833	845.3	297.243	69.1675	853.08	37.554	32.3116	12.0372	4.03479	19.1219	10.4335	145.984	752.566	183.205	853.08	34.9328	8.03601	1.69711	0.227397	0.391399	0.369366	0.473054	6.41952	4.18722	7.07384	26.6381	34.1256	12	2.79236	34.4397	1.51609	1.30445
30	PS 062	43	m	2018		Base line			4.608	14.0691	8.17805	0.0111048	0	4.76255	35.0706	32.1871	5.69058	479.181	470.313	117.382	17.4074	521.057	15.039	14.4386	4.29251	0	7.41942	2.38128	24.3161	474.747	67.395	521.057	14.7388	2.14625	1.00765	0.585726	0.000795342	0	0.341102	2.51182	2.3053	0.407569	34.3198	33.6846	8.40714	1.24675	37.319	1.07712	1.03412
31	PS 062.2					Day0			5.6	23.5401	6.37296	6.77532	0	1.24253	21.7145	50.5466	25.0512	737.173	919.984	101.269	21.5626	626.746	8.50657	4.32468	0	0	12.2294	0.621265	32.4374	828.578	61.4159	626.746	6.41562	0	1.38732	0.375587	0.3993	0	0.0732279	1.27973	2.97894	1.47638	43.4449	54.2188	5.96825	1.27078	36.937	0.50133	0.254873
32	PS 062.3					Day3			11.3	18.8994	9.82652	0	6.9664	3.92733	59.738	138.659	74.091	1460.61	1995.57	252.03	55.2533	1655.32	23.7166	19.1235	0	0	9.5753	5.44687	90.8292	1728.09	153.642	1655.32	21.42	0	0.551984	0.286998	0	0.203464	0.114703	1.74474	4.04972	2.16393	42.6592	58.2837	7.36091	1.61375	48.3459	0.692677	0.55853
33	PS 062.4					Day7			4.125	12.3805	8.36836	1.04038	0	4.67557	6.82279	46.205	40.9938	422.461	412.856	148.33	22.9882	373.688	10.1753	15.4378	0	4.35708	7.26308	2.33779	31.3405	417.659	85.659	373.688	12.8066	2.17854	0.990539	0.669536	0.0832387	0	0.374083	0.545878	3.69677	3.27983	33.8003	33.0318	11.8676	1.83924	29.8981	0.814106	1.23515
34	PS 062.5					Day28			5.64375	15.0266	19.4715	5.83128	16.7694	0	83.3555	40.9069	45.0015	729.072	821.155	134.06	16.5364	677.599	14.0065	21.3948	0	0	13.4431	8.38472	56.4213	775.113	75.298	677.599	17.7007	0	0.878722	1.13865	0.340999	0.980637	0	4.87443	2.39214	2.63158	42.6344	48.0192	7.83948	0.967011	39.6244	0.819067	1.25112
35	PS 063	29	m	2018		Base line			8.328	60.8279	26.1772	20.698	10.3171	0	319.073	214.92	80.48	534.11	1041.97	228.103	60.0042	684.856	31.9531	48.3764	0	0	35.901	5.15856	204.824	788.038	144.054	684.856	40.1647	0	2.41057	1.03739	0.820246	0.40886	0	12.6446	8.51711	3.18937	21.1664	41.2924	9.03958	2.37793	27.1404	1.26628	1.91712
36	PS 063.2					Day0			11.0143	44.4913	4.46406	12.6874	0	0.0354741	225.777	165.539	221.272	1014.79	1645	276.783	34.085	1279.33	37.8743	30.3346	0	0	20.5476	0.017737	204.196	1329.89	155.434	1279.33	34.1045	0	1.33314	0.133761	0.380166	0	0.00106295	6.76522	4.96024	6.63021	30.4071	49.2908	8.29356	1.02133	38.3339	1.13487	0.908948
37	PS 063.3					Day3			7.56	24.9858	4.02961	7.61194	1.35512	2.94002	152.621	101.84	124.493	450.1	779.709	145.077	50.4614	646.281	25.7617	50.2004	0	0	12.2091	2.14757	126.318	614.905	97.7694	646.281	37.9811	0	1.09076	0.175913	0.332301	0.0591581	0.128347	6.66271	4.44585	5.43478	19.6492	34.0383	6.33338	2.2029	28.2135	1.12463	2.19151
38	PS 063.4					Day7			11.4	252.848	158.179	84.2613	5.02857	8.03211	358.378	196.87	231.767	715.266	1140.33	286.602	100.871	1007.39	41.0886	69.1378	6.87501	0	165.096	6.53034	262.338	927.798	193.736	1007.39	55.1132	3.4375	7.32003	4.57932	2.43939	0.145578	0.232532	10.3751	5.69943	6.70972	20.7071	33.0129	8.29719	2.92025	29.1642	1.18952	2.00156
39	PS 063.5					Day28			8	34.4097	13.3388	7.70079	0.121889	2.31427	190.097	132.278	220.364	460.923	840.943	220.384	72.6468	580.775	19.0833	42.8547	0	0	18.4831	1.21808	180.913	650.933	146.515	580.775	30.969	0	1.41954	0.550282	0.31769	0.00502841	0.0954732	7.84227	5.45701	9.09091	19.015	34.6924	9.09173	2.99698	23.9594	0.787265	1.76793
40	PS 064	25	m	2018		Base line			5.42143	39.0196	3.31482	3.77623	29.5267	3.11086	133.382	52.3158	93.4052	414.873	585.174	165.153	62.6168	452.438	18.5168	42.2784	0	4.13048	15.3702	16.3188	93.0344	500.024	113.885	452.438	30.3976	2.06524	2.37534	0.201792	0.22988	1.79746	0.189375	8.11973	3.18476	5.6861	25.2557	35.6229	10.0538	3.81184	27.5425	1.12722	2.57372
41	PS 064.2					Day0			7.98	32.7753	0	3.64804	1.98331	8.16794	270.89	164.301	NA	683.739	1141.77	220.115	34.4168	862.026	19.2826	27.6128	0	0	12.1411	5.07563	217.595	912.753	127.266	862.026	23.4477	0	1.3555	0	0.150874	0.0820248	0.337806	11.2033	6.7951	NA	28.2777	47.2207	9.10341	1.42339	35.6513	0.79748	1.142
42	PS 064.3					Day3			13.8783	98.5812	16.8764	18.3981	12.5218	8.50522	800.49	327.768	361.462	887.573	1625.08	647.226	237.334	1059.93	30.587	107.992	0	0	44.6185	10.5135	496.573	1256.33	442.28	1059.93	69.2896	0	2.34432	0.401329	0.437517	0.297775	0.202259	19.0361	7.79451	8.59578	21.107	38.6454	15.3914	5.64394	25.2058	0.727377	2.56811
43	PS 064.4					Day7			3.66	73.2097	31.1137	6.30102	10.3704	0.0731011	104.924	3.78565	NA	191.007	260.341	99.5401	50.4193	150.879	12.5973	24.4444	0	0	36.8748	5.22173	54.3549	225.674	74.9797	150.879	18.5208	0	6.60154	2.80561	0.568182	0.935126	0.00659174	9.46132	0.341364	NA	17.2237	23.4757	8.97582	4.54646	13.6052	1.13593	2.20422
44	PS 064.5					Day28			5.74545	28.0135	0.275106	5.01663	1.3041	6.41393	290.325	95.0847	201.406	381.697	634.877	197.287	79.3728	456.559	12.8194	18.7743	0	0	11.1017	3.85901	195.605	508.287	138.33	456.559	15.7968	0	1.60916	0.0158028	0.288167	0.0749107	0.368432	16.677	5.4619	11.5692	21.9256	36.4689	11.3327	4.55937	26.2259	0.736377	1.07844
45	VAC 001A	21	f	2018		Base line		Purple	3.945	14.8548	7.56541	10.2817	0	6.73734	7.82167	30.1662	NA	227.821	NA	147.102	28.0753	240.625	27.7985	7.68351	0	0	10.9006	3.36867	18.9939	227.821	87.5886	240.625	17.741	0	1.24273	0.632911	0.860151	0	0.563636	0.65435	2.52366	NA	19.0591	NA	12.3063	2.34874	20.1303	2.32558	0.642792
46	VAC 001B					Day0			11.895	15.7528	1.10762	6.89647	4.46132	2.56526	15.4589	227.48	NA	1884.99	NA	392.16	56.3552	2124.87	12.3533	21.6809	0.583013	0	7.91896	3.51329	121.469	1884.99	224.257	2124.87	17.0171	0.291506	0.437069	0.0307314	0.191346	0.123782	0.0711744	0.428916	6.31155	NA	52.3001	NA	10.8807	1.5636	58.9555	0.342749	0.601547
47	VAC 001C					Day3			2.595	19.8063	0	6.50105	5.32203	6.51267	2.90505	5.15053	32.8326	88.6343	114.534	78.0437	28.4803	144.023	10.2671	17.8489	0.871979	0.0252963	8.7691	5.91735	13.6294	101.584	53.262	144.023	14.058	0.448638	2.51897	0	0.826805	0.676858	0.828284	0.369466	0.655047	4.17567	11.2725	14.5664	9.92562	3.62214	18.3169	1.30577	2.27004
48	VAC 001D					Day7			3.78	19.5571	8.13914	4.81582	12.9986	3.88562	33.3803	28.7368	52.3013	162.957	204.69	133.667	38.7451	235.834	24.443	46.6678	0.946194	1.23161	10.8373	8.4421	38.1395	183.823	86.2059	235.834	35.5554	1.0889	1.70753	0.710631	0.420471	1.13491	0.339255	2.91445	2.50902	4.56644	14.2278	17.8716	11.6705	3.38285	20.5907	2.13413	4.07458
49	VAC 001E					Day28	a cold		3.315	18.6273	12.4728	5.20865	8.34763	3.14965	1.19538	46.5077	5.93343	118.878	277.439	142.478	46.1514	212.473	17.4823	6.85496	5.79183	1.77548	12.1029	5.74864	17.8788	198.158	94.3149	212.473	12.1686	3.78366	1.85449	1.24176	0.51856	0.831068	0.313572	0.119009	4.63019	0.590717	11.8352	27.6211	14.1848	4.59472	21.1533	1.7405	0.682462
50	VAC 002A	21	m	2018		Base line			3.36	7.94793	NA	5.46039	3.21161	0	31.8907	17.6048	NA	182.624	NA	137.269	57.3406	181.866	5.90762	20.2603	0	0	6.70416	1.6058	24.7477	182.624	97.3049	181.866	13.084	0	0.780678	NA	0.536342	0.315457	0	3.13243	1.72921	NA	17.9381		13.4831	5.63223	17.8636	0.580271	1.99005
51	VAC 002B					Day0			2.82	13.6832	NA	1.77116	5.28037	0	36.9229	26.4907	NA	175.341	NA	125.786	57.2978	186.258	32.5683	NA	1.08987	0	7.72718	2.64019	31.7068	175.341	91.5417	186.258	32.5683	0.544936	1.60138	NA	0.207285	0.617978	0	4.3212	3.10028	NA	20.5207	NA	14.7211	6.70573	21.7983	3.81156	NA
52	VAC 002C					Day3			4.035	11.648	NA	3.99819	1.36072	1.77241	70.4235	40.6045	NA	220.858	NA	179	39.3449	292.613	10.8004	NA	0	0	7.82312	1.56656	55.514	220.858	109.173	292.613	10.8004	0	0.952723	NA	0.327022	0.111297	0.14497	5.76012	3.32115	NA	18.0645	NA	14.6409	3.21812	23.9336	0.883392	NA
53	VAC 002D					Day7			3.42	30.0048	4.74804	0.00643736	7.28387	3.61376	21.8892	21.2442	38.064	114.469	329.811	139.312	35.7676	187.118	13.2525	3.27856	3.73379	0	11.5864	5.44881	27.0658	222.14	87.54	187.118	8.26553	1.8669	2.89549	0.45819	0.000621211	0.702899	0.348731	2.11232	2.05008	3.67321	11.0464	31.8271	13.4438	3.4516	18.057	1.27888	0.316384
54	VAC 002E					Day28			2.925	24.6793	6.98755	5.91488	0.951427	0.858223	48.0693	26.2347	NA	153.298	151.72	127.847	29.2042	150.281	19.9062	21.4985	4.3943	0	12.5272	0.904825	37.152	152.509	78.5258	150.281	20.7024	2.19715	2.78461	0.788417	0.667386	0.107351	0.0968349	5.42374	2.96011	NA	17.2969	17.1189	14.4252	3.29516	16.9565	2.24605	2.42572
55	VAC 003A	56	f	2018		Base line			2.1	17.6831	1.44449	0	2.80789	0	6.48522	4.26273	6.11827	84.1176	69.4001	73.4351	34.1357	103.846	3.82644	9.96882	0	1.67302	6.37588	1.40395	5.62207	76.7589	53.7854	103.846	6.89763	0.83651	2.77906	0.227015	0	0.441285	0	1.01921	0.669925	0.961538	13.2198	10.9068	11.5409	5.36471	16.3203	0.601358	1.56669
56	VAC 003B					Day0		yellow	2.715	8.03435	2.40821	6.04981	6.47907	10.9243	12.4342	7.68827	NA	167.357	NA	75.6325	24.013	186.214	15.5924	32.1373	0.0774765	0	5.49746	8.70167	10.0612	167.357	49.8228	186.214	23.8648	0.0387382	0.976648	0.29274	0.73541	0.787589	1.32794	1.51149	0.934579	NA	20.3438	NA	9.19383	2.919	22.6359	1.89539	3.90658
57	VAC 003C					Day3		yellow	3.06	89.9524	NA	13.7748	5.91974	24.9786	9.77298	8.94222	NA	122.124	NA	107.966	44.0271	146.161	17.17	NA	1.91725	3.14298	51.8636	15.4491	9.3576	122.124	75.9964	146.161	17.17	2.53011	9.70172	NA	1.48566	0.638468	2.69403	1.05405	0.964453	NA	13.1716	NA	11.6445	4.74849	15.764	1.85185	NA
58	VAC 003D					Day7			3.015	25.6802	NA	1.20309	1.02186	2.05805	22.6205	6.10217	NA	129.664	NA	98.7848	55.9424	189.698	18.8509	32.5011	0	0	13.4417	1.53996	14.3613	129.664	77.3636	189.698	25.676	0	2.81105	NA	0.131694	0.111857	0.225282	2.47612	0.667965	NA	14.1935	NA	10.8134	6.12366	20.765	2.06349	3.55769
59	VAC 003E					Day28			2.58	16.0951	1.59798	1.45604	3.1518	7.50826	30.2204	10.4428	8.77514	90.4262	156.124	128.665	68.38	119.693	2.39685	7.90493	0.033493	0	6.38304	5.33003	16.4795	123.275	98.5226	119.693	5.15089	0.0167465	2.05888	0.204414	0.186256	0.403177	0.960455	3.86579	1.33585	1.12251	11.5673	19.9713	16.4588	8.74715	15.3111	0.306604	1.0112
60	VAC 004A	31	f	2018		Base line			1.845	32.4233	1.10673	0.0397789	12.0236	5.78016	20.4913	9.13302	NA	74.3356	NA	64.4	30.8608	117.719	28.8644	36.7015	3.88264	0	11.1899	8.90186	14.8122	74.3356	47.6304	117.719	32.783	1.94132	5.79987	0.197971	0.00711563	2.15077	1.03395	3.66549	1.63371	NA	13.2971	NA	11.5199	5.52036	21.0575	5.16326	6.56515
61	VAC 004B					Day0			2.14286	27.5498	0.320161	6.2296	3.92965	8.80565	20.3797	20.2556	3.21184	111.54	107.477	115.758	29.1231	111.215	19.9814	15.1711	2.31704	0	11.3665	6.36765	14.6157	109.508	72.4407	111.215	17.5763	1.15852	4.24309	0.0493097	0.959454	0.605227	1.35621	3.13878	3.11967	0.494673	17.1788	16.5531	17.8286	4.4854	17.1289	3.07745	2.33658
62	VAC 004C					Day3			2.025	69.3973	44.153	15.9789	8.62166	6.57712	7.35245	4.97799	NA	36.4339	NA	63.504	38.0652	92.304	15.0918	2.97659	5.34085	0	43.1764	7.59939	6.16522	36.4339	50.7846	92.304	9.03421	2.67042	11.3103	7.19603	2.60423	1.40515	1.07193	1.1983	0.811309	NA	5.93797	NA	10.3498	6.20384	15.0436	2.45965	0.485123
63	VAC 004D					Day7			2.325	29.9195	10.4952	2.51159	12.6172	9.59972	16.3391	26.5934	0	124.497	233.106	75.3593	44.0117	209.111	21.4883	15.1229	2.47236	2.25085	14.3088	11.1085	14.3108	178.802	59.6855	209.111	18.3056	2.3616	4.24706	1.48979	0.356519	1.79101	1.36268	2.31932	3.77492	0	17.6723	33.0894	10.6972	6.24745	29.6832	3.05025	2.14669
64	VAC 004E					Day28			1.665	11.5941	4.69415	1.57802	13.7907	5.41142	9.74546	2.8712	0.465831	112.113	150.879	71.7202	31.4801	139.109	7.57783	26.0261	1.92195	0	5.95542	9.60105	4.36083	131.496	51.6001	139.109	16.802	0.960974	2.29816	0.930465	0.312792	2.73356	1.07264	1.93173	0.569124	0.0923361	22.2228	29.9069	14.2162	6.23992	27.5739	1.50206	5.15884
65	VAC 005A	25	f	2018		Base line			3.39	15.1922	6.25443	6.46763	7.39756	1.19043	16.4316	20.7441	NA	126.25	154.465	94.5838	60.4122	121.015	8.72746	10.9967	0.030163	0	9.30476	4.294	18.5879	140.358	77.498	121.015	9.8621	0.0150815	1.47904	0.608899	0.629656	0.720188	0.115894	1.5997	2.01954	NA	12.2911	15.038	9.20819	5.88142	11.7814	0.849661	1.07059
66	VAC 005B					Day0			3.63	34.6576	0.90687	6.83976	0	3.49962	13.831	33.4942	31.0353	134.108	160.654	108.822	62.6433	164.086	15.6889	19.2127	2.13469	2.17712	14.1347	1.74981	26.1202	147.381	85.7327	164.086	17.4508	2.15591	3.15101	0.082451	0.621859	0	0.318179	1.25749	3.04524	2.82167	12.1929	14.6064	9.8939	5.69541	14.9184	1.42641	1.74679
67	VAC 005C					Day3			2.97	11.5849	1.62752	1.67493	6.89389	0	19.1149	12.6951	22.0927	93.2424	146.602	93.5236	51.1116	92.7321	7.57985	8.64291	0.01634	1.83595	4.96243	3.44695	17.9676	119.922	72.3176	92.7321	8.11138	0.926145	1.28733	0.180854	0.186121	0.766065	0	2.12409	1.41071	2.45499	10.3613	16.2908	10.3925	5.67963	10.3046	0.84229	0.960419
68	VAC 005D					Day7			2.415	19.6335	5.69768	18.3241	9.65925	8.15517	10.4359	12.303	NA	75.3337	150.083	89.0128	17.5784	102.234	21.4263	18.0593	0.595175	0	14.5518	8.90721	11.3694	112.708	53.2956	102.234	19.7428	0.297588	2.68311	0.778643	2.50417	1.32003	1.11448	1.42616	1.68132	NA	10.2951	20.5103	12.1644	2.40225	13.9713	2.92811	2.46798
69	VAC 005E					Day28			5.46	25.2845	1.4803	3.34142	7.23138	0.494758	38.2562	35.5843	58.5	263.981	381.723	237.564	80.929	371.98	22.7032	26.9437	6.23847	2.95415	10.0354	3.86307	44.1135	322.852	159.247	371.98	24.8234	4.59631	1.52834	0.0894775	0.201974	0.437105	0.0299059	2.31242	2.15091	3.53607	15.9565	23.0735	14.3597	4.8918	22.4846	1.37231	1.62863
70	VAC 006A	26	f	2018		Base line			2.1	15.3339	NA	0	1.89622	0	19.4459	20.0422	NA	109.494	25.8055	52.7149	18.7016	183.705	0.0542941	1.71163	0.0498453	2.82325	7.66694	0.94811	19.7441	67.6496	35.7083	183.705	0.882964	1.43655	2.40985	NA	0	0.298007	0	3.05609	3.14981	NA	17.2079	4.05556	8.2846	2.93912	28.8708	0.00853279	0.268998
71	VAC 006B					Day0			2.025	5.1918	0.601741	0	0	0	10.0635	16.4481	NA	140.815	NA	33.6439	25.6008	214.993	3.85769	1.48709	0.0520199	0	1.93118	0	13.2558	140.815	29.6224	214.993	2.67239	0.02601	0.846156	0.0980713	0	0	0	1.64014	2.6807	NA	22.95	NA	5.48326	4.1724	35.0394	0.628723	0.242365
72	VAC 006C					Day3			2.91	42.3201	1.9013	4.74992	3.34254	2.63813	22.9841	23.378	NA	161.489	NA	77.1663	29.6913	272.717	5.35798	4.60433	0	0	16.3238	2.99033	23.181	161.489	53.4288	272.717	4.98116	0	4.79967	0.215633	0.538704	0.379088	0.299199	2.60671	2.65138	NA	18.315	NA	8.75169	3.36739	30.9297	0.607667	0.522193
73	VAC 006D					Day7			3.675	13.954	0	4.55879	0.0571419	1.42588	21.091	23.5537	53.707	326.965	419.905	85.9753	8.75946	421.421	8.26651	21.5659	0.039599	0	6.17094	0.741511	32.7839	373.435	47.3674	421.421	14.9162	0.0197995	1.25314	0	0.409402	0.00513163	0.128051	1.89407	2.11523	4.82315	29.3631	37.7095	7.721	0.786642	37.8457	0.742373	1.93672
74	VAC 006E					Day28			3.71667	36.4657	14.0713	19.0213	17.5293	19.9947	36.9946	40.6161	NA	287.521	342.402	100.475	21.5679	385.1	35.0087	32.9331	2.2133	1.78965	23.1861	18.762	38.8053	314.962	61.0215	385.1	33.9709	2.00148	3.23809	1.2495	1.68906	1.55657	1.77549	3.28505	3.60663	NA	25.5313	30.4047	8.922	1.91518	34.1962	3.10871	2.92439
75	VAC 008A	26	f	2018		Base line			2.49	32.2309	5.77211	4.94432	3.9283	0	16.7028	18.8659	NA	170.419	251.037	97.2765	59.0288	167.684	15.6111	8.95159	2.447	0.0218516	14.3158	1.96415	17.7843	210.728	78.1527	167.684	12.2813	1.23443	4.27199	0.765054	0.655337	0.52067	0	2.21384	2.50056	NA	22.5879	33.2733	12.8934	7.82388	22.2254	2.06914	1.18647
76	VAC 008B					Day0			2.86667	35.7657	8.41259	6.53022	2.55267	3.59269	10.5698	15.0814	2.37973	153.902	272.152	86.4404	31.2072	244.655	2.22082	8.96412	2.48569	0	16.9028	3.07268	9.34365	213.027	58.8238	244.655	5.59247	1.24284	4.11763	0.968523	0.75181	0.293883	0.413619	1.21688	1.73629	0.273973	17.7184	31.3322	9.95169	3.59281	28.1666	0.255678	1.03202
77	VAC 008C					Day3			2.865	25.4848	9.61193	8.42087	9.71419	1.09818	19.8425	15.7301	NA	176.458	NA	104.132	59.3596	188.436	18.3502	33.6729	6.70344	0	14.5059	5.40618	17.7863	176.458	81.7456	188.436	26.0116	3.35172	2.93572	1.10724	0.970041	1.11902	0.126505	2.28576	1.81202	NA	20.327	NA	11.9954	6.83792	21.7069	2.11385	3.87894
78	VAC 008D					Day7			3.885	109.944	72.6046	55.5484	16.2569	1.48904	19.4746	25.7055	NA	346.462	405.364	82.2862	38.7811	384.344	36.5984	26.7792	8.01226	3.62516	79.3658	8.87296	22.59	375.913	60.5337	384.344	31.6888	5.81871	9.33984	6.1678	4.71887	1.38103	0.126495	1.65438	2.1837	NA	29.4322	34.4359	6.99026	3.29448	32.6503	3.10905	2.27491
79	VAC 008E					Day28			2.085	11.9993	5.29732	7.43605	2.81551	1.44257	30.5239	15.333	7.32554	239.329	198.18	63.6913	34.7995	161.458	7.49506	5.63348	1.54247	0.0142734	8.24421	2.12904	17.7275	218.755	49.2454	161.458	6.56427	0.778372	1.89935	0.838509	1.17705	0.445665	0.228343	4.83161	2.42705	1.15955	37.8832	31.3697	10.0817	5.50839	25.5571	1.18639	0.89172
80	VAC 009A	27	m	2018		Base line			3.3	11.0222	0	2.23586	5.32498	3.3973	39.1421	38.5326	NA	104.046	178.084	59.5758	34.0142	159.76	9.66142	14.0421	0	0	4.41937	4.36114	38.8374	141.065	46.795	159.76	11.8517	0	1.10233	0	0.223608	0.532551	0.339764	3.9146	3.85364	NA	10.4056	17.8102	5.95817	3.40176	15.9776	0.966238	1.40435
81	VAC 009B					Day0			3.015	15.519	0	0	3.68509	2.87727	39.5506	15.1889	4.83357	149.342	212.006	47.8822	21.109	181.528	9.64932	16.0651	0	0	5.17299	3.28118	19.8577	180.674	34.4956	181.528	12.8572	0	1.69876	0	0	0.403384	0.314957	4.32935	1.66264	0.529101	16.3475	23.207	5.24136	2.31066	19.8708	1.05625	1.75854
82	VAC 009C					Day3			3.72	22.928	1.37593	7.56847	8.94517	1.97719	38.1651	28.037	NA	65.0202	187.392	74.1515	19.8871	110.769	5.68608	12.3082	0	0	10.6241	5.46118	33.1011	126.206	47.0193	110.769	8.99715	0	2.03414	0.12207	0.671464	0.793603	0.175413	3.38595	2.48741	NA	5.7685	16.6252	6.57861	1.76435	9.8273	0.504461	1.09197
83	VAC 009D					Day7			5.1	35.4258	3.66827	10.952	22.8577	8.29968	65.2336	25.6801	25.7074	183.038	320.218	88.6505	34.9639	267.871	66.9441	68.0333	0	0	16.682	15.5787	38.8737	251.628	61.8072	267.871	67.4887	0	2.29249	0.237383	0.708733	1.47917	0.537092	4.22142	1.66182	1.66359	11.8448	20.7221	5.73678	2.2626	17.3346	4.33211	4.40259
84	VAC 009E					Day28			4.392	31.2739	5.31493	13.5055	10.5424	0.105009	26.9698	49.9061	20.0188	167.138	179.627	148.765	16.1733	185.869	11.3893	28.1793	0	0	16.6981	5.32369	32.2983	173.383	82.469	185.869	19.7843	0	2.35005	0.399386	1.01486	0.792197	0.00789079	2.02662	3.75015	1.5043	12.5595	13.4979	11.1788	1.21533	13.967	0.855843	2.11751
85	VAC 010A	23	f	2018		Base line			2.955	24.3053	1.6826	4.39285	7.09631	2.33229	24.7423	12.1829	NA	144.094	184.968	93.7811	62.5445	216.445	20.9155	23.1691	0.057515	0	10.1269	4.7143	18.4626	164.531	78.1628	216.445	22.0423	0.0287575	2.71457	0.187923	0.490621	0.79256	0.260485	2.76338	1.36067	NA	16.0934	20.6583	10.4741	6.98537	24.1739	2.33598	2.58767
86	VAC 010B					Day0			27.6	48.461	4.73088	10.4846	2.64975	0.305192	22.3971	322.45	84.006	4640.68	6915.29	556.381	113.873	5539.03	30.2496	29.8323	6.39045	2.93091	21.2255	1.47747	142.951	5777.98	335.127	5539.03	30.0409	4.66068	0.579483	0.0565705	0.125371	0.0316849	0.0036494	0.267819	3.85576	1.00452	55.4919	82.6911	6.65304	1.36166	66.2341	0.361716	0.356726
87	VAC 010C					Day3			2.805	28.4597	4.8903	7.31154	4.14256	6.48921	26.4206	23.999	10.2647	156.369	292.738	104.797	60.3468	203.449	22.7661	21.3388	2.4894	2.14923	13.5539	5.31588	20.2281	224.554	82.572	203.449	22.0524	2.31932	3.34854	0.575388	0.860268	0.487409	0.763513	3.10861	2.8237	1.20773	18.3983	34.4433	12.3303	7.10033	23.9375	2.67863	2.5107
88	VAC 010D					Day7		Purple	2.595	44.8724	12.3775	5.97921	13.1274	4.4446	16.3381	10.0114	2.58902	78.818	155.708	54.8571	66.3106	206.225	11.3516	13.0955	0.067213	0	21.0764	8.78602	9.64617	117.263	60.5838	206.225	12.2235	0.0336065	5.70688	1.57418	0.760438	1.66955	0.565266	2.07789	1.27325	0.329272	10.0241	19.803	6.97674	8.4334	26.2278	1.4437	1.66549
89	VAC 010E					Day28			2.64	20.4901	8.74717	4.07307	0	1.31594	37.9393	22.5853	NA	229.189	295.283	81.8435	52.238	237.677	6.75662	6.20213	0	2.50195	11.1034	0.657968	30.2623	262.236	67.0407	237.677	6.47937	1.25098	2.56152	1.09351	0.509184	0	0.164508	4.74289	2.82344	NA	28.6514	36.9141	10.2315	6.5304	29.7126	0.844661	0.775344
90	VAC 011A	23	f	2018		Base line			1.65	6.45239	1.57135	2.98542	3.79713	2.57911	11.6329	5.19074	NA	96.8838	124.506	31.8102	10.5295	100.942	14.7873	5.92877	0.0174259	0	3.66972	3.18812	8.41183	110.695	21.1699	100.942	10.358	0.00871297	1.29061	0.314301	0.597143	0.759502	0.515874	2.32682	1.03825	NA	19.3787	24.9037	6.36268	2.10611	20.1904	2.95776	1.18587
91	VAC 011B					Day0			2.34	14.0518	0	1.66814	2.07731	0	10.4929	10.2378	NA	70.0674	168.352	50.1358	42.0415	106.114	5.14538	14.7169	2.93826	0	5.23999	1.03866	10.3653	119.21	46.0886	106.114	9.93112	1.46913	1.98187	0	0.235275	0.292984	0	1.47992	1.44394	NA	9.8823	23.7443	7.07114	5.92952	14.9662	0.725703	2.07566
92	VAC 011C					Day3			2.025	8.47308	NA	0	0	0.437955	28.205	15.7193	NA	124.232	NA	35.6093	32.6509	111.946	16.4803	NA	2.94552	0	4.23654	0.218978	21.9621	124.232	34.1301	111.946	16.4803	1.47276	1.38094	NA	0	0	0.0713776	4.59683	2.56191	NA	20.2473	NA	5.80357	5.32141	18.2449	2.68595	NA
93	VAC 011D					Day7			2.4	21.1952	0	0.0930836	0	0.0397921	19.6653	6.52863	NA	101.33	NA	28.8752	34.9907	163.192	6.89496	6.31379	4.56546	0	7.09608	0.019896	13.097	101.33	31.9329	163.192	6.60437	2.28273	2.91463	0	0.0128003	0	0.00547196	2.70425	0.897776	NA	13.9342	NA	3.97074	4.8117	22.4411	0.948152	0.868233
94	VAC 011E					Day28			1.99412	10.2806	NA	2.01742	NA	NA	NA	NA	NA	185.5	NA	39.4177	NA	NA	7.64228	NA	NA	NA	6.149	NaN	NaN	185.5	39.4177	NaN	7.64228	NaN	1.70147	NA	0.33389	NA	NA	NA	NA	NA	30.7009	NA	6.52377	NA	NA	1.26482	NA
95	VAC 012A	22	f	2018		Base line			3.81	18.9903	4.30044	0	1.61599	0	22.4957	22.6669	NA	230.596	235.519	79.39	33.7191	266.984	6.69833	9.74835	0.847575	1.49525	7.76357	0.807995	22.5813	233.058	56.5546	266.984	8.22334	1.17141	1.64499	0.372517	0	0.139982	0	1.94864	1.96347	NA	19.9749	20.4013	6.87699	2.92084	23.1269	0.580229	0.84443
96	VAC 012B					Day0			2.79	14.209	5.92586	2.43052	8.52169	4.23507	18.7773	8.36396	NA	130.534	171.506	54.7885	21.8068	176.762	3.68402	4.92535	0.0299872	3.0369	7.52178	6.37838	13.5706	151.02	38.2976	176.762	4.30469	1.53344	1.6808	0.700978	0.28751	1.00804	0.500972	2.22119	0.989385	NA	15.4411	20.2877	6.48101	2.57955	20.9095	0.435788	0.582627
97	VAC 012C					Day3			3.51	17.9916	4.20981	6.77161	5.39437	2.6295	20.8177	6.15561	NA	112.382	106.829	123.168	34.1958	133.193	3.52463	16.3571	2.01741	0	9.65768	4.01193	13.4867	109.605	78.6819	133.193	9.94085	1.00871	1.69169	0.395833	0.636711	0.507214	0.247242	1.95742	0.57879	NA	10.5668	10.0448	11.5811	3.21531	12.5237	0.331409	1.538
98	VAC 012D					Day7			6.015	21.9263	3.71285	4.00523	2.35007	0	51.1803	56.3589	NA	367.012	733.278	93.407	47.8871	565.031	4.38735	14.514	0	0	9.88146	1.17504	53.7696	550.145	70.647	565.031	9.45068	0	1.20306	0.203718	0.21976	0.128945	0	2.80818	3.09232	NA	20.1373	40.2337	5.12509	2.62748	31.0023	0.240727	0.796359
99	VAC 012E					Day28	influenza by self report		5.32	31.2924	2.56565	6.98232	6.65159	3.27143	55.5439	35.7335	48.9371	391.902	458.302	143.324	70.1744	500.771	13.7567	12.7528	12.7544	6.62087	13.6135	4.96151	46.7382	425.102	106.749	500.771	13.2548	9.68763	1.94126	0.159163	0.433157	0.41264	0.202948	3.44573	2.21677	3.03588	24.3122	28.4314	8.89127	4.35336	31.0659	0.853417	0.791139
100	VAC 013A	22	f	2018		Base line			5.115	32.7861	3.5837	1.64989	1.77907	8.29091	31.8291	32.6358	NA	398.489	447.747	123.16	63.0056	449.842	31.4952	11.5431	1.72443	0	12.6732	5.03499	32.2324	423.118	93.0828	449.842	21.5191	0.862215	2.11544	0.23123	0.106455	0.11479	0.534951	2.0537	2.10574	NA	25.7116	28.8898	7.94661	4.06528	29.025	2.03215	0.744792
101	VAC 013B					Day0			3.96	29.3521	0.950475	4.42957	2.54364	13.4586	21.0967	30.6671	NA	214.391	446.438	114.878	55.2499	311.674	25.1475	24.484	0.0285727	0	11.5774	8.0011	25.8819	330.414	85.0642	311.674	24.8158	0.0142863	2.44626	0.0792142	0.369168	0.211991	1.12166	1.75823	2.55585	NA	17.8677	37.2069	9.57416	4.60462	25.9754	2.09584	2.04054
102	VAC 013C					Day3			3.405	39.4951	6.80788	5.935	15.9552	5.31625	24.6347	29.298	NA	184.067	198.351	100.2	38.0475	245.953	9.53554	24.1001	0.0493549	2.04714	17.4127	10.6357	26.9664	191.209	69.1237	245.953	16.8178	1.04825	3.8281	0.659861	0.575256	1.54647	0.515282	2.38774	2.83974	NA	17.8409	19.2254	9.71197	3.68779	23.8393	0.924242	2.33593
103	VAC 013D					Day7			4.26	36.2565	5.71917	6.30632	5.52132	2.15982	43.9589	17.494	27.9669	338.271	374.59	164.056	87.909	349.904	39.6824	22.6205	2.90296	0	16.094	3.84057	29.8066	356.43	125.983	349.904	31.1514	1.45148	2.80888	0.443079	0.488566	0.42775	0.167327	3.4056	1.35531	2.16667	26.2067	29.0204	12.7098	6.81053	27.1079	3.0743	1.75246
104	VAC 013E					Day28			5.97	41.7583	9.05849	6.41222	0	2.37742	84.4837	60.6826	NA	631.567	480.975	301.133	109.926	517.239	6.1688	16.3202	5.30119	0	19.0763	1.18871	72.5832	556.271	205.53	517.239	11.2445	2.65059	2.30848	0.50077	0.35448	0	0.131428	4.67042	3.35465	NA	34.9142	26.5892	16.6472	6.07694	28.5939	0.341023	0.902212
105	VAC 014A	30	m	2018		Base line			2.85	13.7488	0.192929	4.26821	12.0149	6.66199	61.3594	18.5159	26.5603	145.857	199.395	52.2353	23.7561	129.237	14.0639	9.28012	0	0	6.06996	9.33845	35.4786	172.626	37.9957	129.237	11.672	0	1.59212	0.0223414	0.494263	1.39134	0.771465	7.10549	2.14416	3.07571	16.8904	23.0901	6.04891	2.75098	14.9658	1.62861	1.07465
106	VAC 014B					Day0			3.99	27.8334	4.61956	5.30284	10.4383	2.68132	102.471	36.5174	20.6233	190.699	367.83	73.6883	49.058	302.841	15.2112	49.4997	0	0	12.5853	6.55982	53.2039	279.264	61.3732	302.841	32.3555	0	2.30224	0.382107	0.438624	0.863406	0.221786	8.47589	3.02054	1.70586	15.7737	30.4251	6.09513	4.05784	25.0495	1.25819	4.09437
107	VAC 014C					Day3			2.55	41.871	7.50562	9.52197	3.28819	8.44243	42.3335	8.75988	NA	103.052	168.736	57.8278	25.8099	167.632	21.5907	20.1411	0	3.40498	19.6328	5.86531	25.5467	135.894	41.8189	167.632	20.8659	1.70249	5.41914	0.971413	1.23238	0.425573	1.09266	5.479	1.13375	NA	13.3374	21.8386	7.48435	3.34044	21.6957	2.79437	2.60675
108	VAC 014D					Day7			2.67	17.7197	2.72979	4.71302	2.54875	4.82807	16.3952	22.4435	NA	198.068	249.118	84.9651	29.4893	210.769	11.7964	20.2306	0.85098	0.606197	8.38751	3.68841	19.4194	223.593	57.2272	210.769	16.0135	0.728589	2.1903	0.337423	0.582566	0.315046	0.596787	2.02658	2.7742	NA	24.4828	30.7929	10.5024	3.64511	26.0527	1.45813	2.50067
109	VAC 014E					Day28			3.33333	26.5998	0	0.478522	26.9098	21.8434	45.5264	25.6741	NA	181.073	293.084	101.146	47.2136	202.185	22.2203	32.7591	0	5.08176	9.02612	24.3766	35.6002	237.079	74.1798	202.185	27.4897	2.54088	2.63365	0	0.0473784	2.66433	2.16271	4.50756	2.54199	NA	17.9281	29.0182	10.0145	4.67461	20.0184	2.20003	3.24347
110	VAC 015A	29	m	2018		Base line			2.79	12.9532	NA	1.643	2.37931	0	11.5601	18.388	NA	160.588	NA	102.503	19.6734	187.282	4.16637	5.54568	0	2.89709	7.29808	1.18966	14.9741	160.588	61.0882	187.282	4.85603	1.44854	1.53225	NA	0.194352	0.281452	0	1.36746	2.17515	NA	18.9962	NA	12.1252	2.3272	22.1538	0.492846	0.656007
111	VAC 015B					Day0			3.77647	3.89456	3.71516	9.94861	0	0	20.7073	26.4236	NA	253.027	NA	91.8273	41.776	340.659	7.81674	8.20756	0	0	5.85278	0	23.5655	253.027	66.8017	340.659	8.01215	0	0.340353	0.324675	0.869428	0	0	1.80965	2.30921	NA	22.1125	NA	8.02497	3.65088	29.7709	0.68312	0.717274
112	VAC 015C					Day3			3	28.1431	12.4859	22.0703	0.0129283	0	42.7114	10.2262	0	102.342	149.815	103.386	21.9282	140.357	17.1231	23.0824	0	3.35695	20.8998	0.00646414	17.6459	126.079	62.657	140.357	20.1028	1.67848	3.09605	1.37359	2.42797	0.00142225	0	4.69873	1.125	0	11.2588	16.4813	11.3736	2.41234	15.4408	1.88373	2.53932
113	VAC 015D					Day7			3.9	13.525	10.1135	1.4055	4.46923	0	12.06	24.6374	7.71167	254.607	352.856	114.804	15.4144	311.88	5.41913	15.8829	0	0	8.348	2.23462	14.803	303.731	65.109	311.88	10.651	0	1.14454	0.855842	0.118939	0.378204	0	1.02057	2.08491	0.652591	21.5458	29.86	9.71512	1.30443	26.3925	0.458588	1.34407
114	VAC 015E					Day28			1.92	16.187	3.21161	1.20206	3.90562	1.69381	19.2476	18.2734	NA	123.31	NA	52.342	15.5267	84.423	7.33539	7.613	0.131709	0	6.86689	2.79972	18.7605	123.31	33.9344	84.423	7.4742	0.0658547	2.78242	0.55205	0.206625	0.671346	0.291153	3.30852	3.14105	NA	21.196	NA	8.99719	2.66892	14.5117	1.2609	1.30862
115	VAC 016A	28	m	2018		Base line			3.195	9.28226	0	0	1.79364	1.97925	36.4307	16.2306	NA	110.346	NA	145.802	32.3613	122.996	7.01511	10.0147	0	0	3.09409	1.88644	26.3307	110.346	89.0814	122.996	8.51489	0	0.958827	0	0	0.185277	0.20445	3.76317	1.67657	NA	11.3984	NA	15.0608	3.34282	12.7051	0.724638	1.03448
116	VAC 016B					Day0			5.04375	42.9073	0	0	28.501	0	116.145	38.2316	NA	340.572	NA	183.153	90.7467	170.337	28.2778	NA	0	0	14.3024	14.2505	77.1884	340.572	136.95	170.337	28.2778	0	2.8076	0	0	1.86494	0	7.59986	2.50165	NA	22.285	NA	11.9845	5.93792	11.1458	1.85033	NA
117	VAC 016C					Day3			4.155	27.2473	11.6085	5.51369	0	5.9678	19.3632	16.0408	36.1721	172.02	299.881	103.199	58.6392	202.137	11.0687	9.82032	0	0	14.7898	2.9839	23.8587	235.95	80.919	202.137	10.4445	0	2.16426	0.92207	0.437955	0	0.474025	1.53802	1.27413	2.87316	13.6636	23.8196	8.19711	4.65773	16.0558	0.87919	0.780031
118	VAC 016D					Day7			3.66	14.9834	13.0597	1.57614	4.27252	0.0290994	45.0027	17.9773	15.6889	115.371	167.045	113.551	54.0261	186.109	16.4113	16.0261	0	0	9.87309	2.15081	26.223	141.208	83.7884	186.109	16.2187	0	1.3511	1.17763	0.142125	0.385266	0.00262398	4.05803	1.62107	1.41471	10.4033	15.063	10.2392	4.87169	16.782	1.47985	1.44512
119	VAC 016E					Day28			3.34286	9.45917	5.03351	6.94313	5.38409	7.93661	34.1933	1.28836	19.612	72.409	171.674	107.619	25.0227	143.348	6.51679	23.105	0	7.06568	7.14527	6.66035	18.3646	122.041	66.321	143.348	14.8109	3.53284	0.933883	0.496947	0.68548	0.53156	0.783564	3.37583	0.127197	1.93625	7.14878	16.949	10.625	2.47044	14.1524	0.643388	2.2811
120	VAC 017A	27	m	2018		Base line			6.24	29.5664	NA	5.23262	1.07918	3.19687	71.6966	50.6645	NA	488.167	NA	238.984	50.98	530.038	19.4538	14.9661	0	0	17.3995	2.13802	61.1805	488.167	144.982	530.038	17.2099	0	1.56376	NA	0.276753	0.0570776	0.169082	3.79203	2.67964	NA	25.8191	NA	12.6398	2.69633	28.0336	1.02891	0.791557
121	VAC 017B					Day0			5.67	13.5026	0	3.8052	1.415	4.89648	60.2727	70.466	NA	472.197	735.308	145.21	42.2872	585.465	11.2288	43.8609	2.39946	0	5.76927	3.15574	65.3694	603.752	93.7487	585.465	27.5449	1.19973	0.785945	0	0.221489	0.0823626	0.285009	3.50829	4.10161	NA	27.4851	42.8	8.45224	2.46141	34.0781	0.653595	2.55301
122	VAC 017C					Day3			5.445	27.2933	NA	0.108902	NA	NA	25.712	4.53156	NA	188.787	NA	NA	115.338	283.591	0	NA	0	0.846166	13.7011	NaN	15.1218	188.787	115.338	283.591	0	0.423083	1.65431	NA	0.00660081	NA	NA	1.55846	0.274667	NA	11.4428	NA	NA	6.99088	17.1891	0	NA
123	VAC 017D					Day7			6.345	73.4102	32.5646	28.5686	1.62686	2.12174	46.2269	62.5231	20.3267	469.034	748.834	169.772	31.3133	637.392	23.5692	19.3666	0.0200961	0	44.8478	1.8743	43.0256	608.934	100.543	637.392	21.4679	0.0100481	3.81841	1.69384	1.48599	0.0846206	0.110362	2.40448	3.25212	1.05729	24.3966	38.9503	8.83063	1.62875	33.1537	1.22594	1.00735
124	VAC 017E					Day28		Purple	9.5	15.365	10.6388	11.1082	8.33017	12.9549	59.8569	90.0718	38.0102	662.456	1111.63	220.326	78.6241	947.383	22.232	40.9001	0	0	12.3707	10.6425	62.6463	887.041	149.475	947.383	31.566	0	0.533783	0.369597	0.385901	0.289393	0.450056	2.07945	3.12912	1.32049	23.0139	38.6182	7.6542	2.73143	32.9124	0.772346	1.42088
125	VAC 018A	21	f	2018		Base line			2.175	25.1779	NA	3.84089	3.03798	3.78267	30.7842	5.97165	NA	135.043	NA	106.516	53.2038	147.172	9.61388	10.7823	0	0	14.5094	3.41033	18.3779	135.043	79.8599	147.172	10.1981	0	3.82047	NA	0.582814	0.460981	0.57398	4.67117	0.906134	NA	20.4914	NA	16.1627	8.07312	22.3318	1.4588	1.63609
126	VAC 018B					Day0			1.455	12.751	NA	0	0	2.33704	12.4714	8.15578	NA	67.0997	NA	68.7244	30.6156	106.72	8.56049	6.51926	1.0014	1.45021	6.37549	1.16852	10.3136	67.0997	49.67	106.72	7.53987	1.22581	2.89226	NA	0	0	0.530102	2.82885	1.84995	NA	15.22	NA	15.5885	6.94444	24.2069	1.94175	1.47874
127	VAC 018C					Day3			2.385	41.2287	NA	22.3366	5.82359	0.892167	22.9518	19.7766	NA	115.87	NA	160.891	53.9645	214.659	26.8597	NA	1.44531	0	31.7827	3.35788	21.3642	115.87	107.428	214.659	26.8597	0.722655	5.70517	NA	3.09091	0.805861	0.123457	3.17604	2.73665	NA	16.034	NA	22.2639	7.46753	29.7042	3.71681	NA
128	VAC 018D					Day7			2.85	56.9512	NA	23.4372	0	1.32672	50.2516	21.6225	NA	134.324	NA	103.967	42.068	159.526	12.4052	34.6174	3.30475	2.44666	40.1942	0.663362	35.9371	134.324	73.0174	159.526	23.5113	2.87571	6.59501	NA	2.71405	0	0.153636	5.81919	2.50391	NA	15.5549	NA	12.0395	4.87152	18.4733	1.43654	4.00873
129	VAC 018E					Day28			4.41081	61.5551	3.4512	4.94669	5.8059	2.18575	47.9051	47.4824	59.3589	270.699	491.522	173.975	70.4847	424.684	10.7378	13.6691	0	2.48836	23.3177	3.99582	51.5821	381.111	122.23	424.684	12.2034	1.24418	4.60578	0.258231	0.370129	0.434418	0.163546	3.58443	3.55281	4.44145	20.2547	36.7775	13.0175	5.27393	31.7764	0.803438	1.02277
130	VAC 020A	30	m	2018		Base line			6.765	30.6333	0.180107	5.65659	7.55387	7.80012	216.067	101.519	219.072	249.555	437.336	194.679	59.5229	279.731	29.1362	31.1919	4.23843	4.3536	12.1567	7.677	178.886	343.445	127.101	279.731	30.1641	4.29601	1.49446	0.00878657	0.275959	0.368518	0.380532	10.5409	4.95263	10.6875	12.1746	21.3356	9.4975	2.90384	13.6468	1.42142	1.52171
131	VAC 020B					Day0			4.095	20.5427	1.41792	7.10469	4.55331	6.65709	51.6293	41.3332	55.146	129.348	144.385	60.9656	26.3861	166.31	8.93222	8.17065	0	0	9.68843	5.6052	49.3695	136.866	43.6758	166.31	8.55143	0	1.65562	0.114276	0.572596	0.36697	0.536522	4.16102	3.33122	4.44444	10.4247	11.6366	4.91347	2.12656	13.4036	0.719884	0.658507
132	VAC 020C					Day3			8.25	82.0425	37.2332	35.0775	43.644	24.9989	113.897	68.8342	43.3028	266.413	275.677	173.615	45.811	329.204	104.161	86.6541	11.3426	4.66531	51.4511	34.3215	75.3447	271.045	109.713	329.204	95.4073	8.00397	3.28203	1.48948	1.40324	1.74594	1.00006	4.55635	2.75364	1.73228	10.6576	11.0282	6.94531	1.83262	13.1695	4.16684	3.46651
133	VAC 020D					Day7			6.705	56.5852	19.9638	19.4413	9.79525	11.1383	183.326	71.7332	143.87	213.407	237.391	195.19	66.6696	233.148	28.8874	52.5816	3.89272	7.21653	31.9968	10.4668	132.976	225.399	130.93	233.148	40.7345	5.55463	2.78523	0.982659	0.95694	0.482141	0.548248	9.02364	3.53084	7.08155	10.5043	11.6849	9.60761	3.28161	11.476	1.42189	2.58817
134	VAC 020E					Day28			9.765	60.6974	8.13494	17.9768	9.41218	11.842	168.566	105.407	213.318	316.149	437.425	172.623	66.9842	443.164	36.6556	48.6908	0	0	28.9364	10.6271	162.43	376.787	119.804	443.164	42.6732	0	2.05142	0.274941	0.607572	0.318109	0.400231	5.69711	3.56251	7.20961	10.6851	14.7839	5.83423	2.2639	14.9778	1.23887	1.64563
135	VAC 021A	22	m	2018		Base line			2.88	20.768	13.3362	5.85816	7.11248	1.12958	35.5374	7.88279	5.72491	181.189	263.554	99.6295	22.5421	180.089	8.75413	4.19871	4.39232	0	13.3208	4.12103	16.3817	222.371	61.0858	180.089	6.47642	2.19616	2.3799	1.52826	0.671315	0.815053	0.129444	4.0724	0.903327	0.656045	20.7633	30.2019	11.417	2.5832	20.6372	1.00318	0.481151
136	VAC 021B					Day0			3.18	15.7129	0.92654	2.65202	2.79743	0.399212	79.8964	28.4405	54.9168	125.07	261.719	104.045	47.1301	185.161	12.9353	9.32116	0	3.31789	6.43049	1.59832	54.4179	193.394	75.5878	185.161	11.1282	1.65894	1.63075	0.09616	0.275238	0.290328	0.0414318	8.29197	2.95167	5.69948	12.9802	27.1623	10.7982	4.89135	19.2167	1.34247	0.967387
137	VAC 021C					Day3			5.04	47.6858	24.0818	25.7511	10.5985	6.14114	86.5231	34.85	NA	364.92	327.605	206.458	35.6592	372.27	47.3373	96.0664	0	0	32.5062	8.36983	60.6866	346.263	121.059	372.27	71.7018	0	3.1226	1.57694	1.68625	0.69402	0.402138	5.66577	2.28208	NA	23.896	21.4525	13.5194	2.33506	24.3772	3.09977	6.29069
138	VAC 021D					Day7			3.165	11.1641	4.86506	10.573	2.27842	3.51624	26.8107	28.4914	NA	236.075	246.666	129.477	36.7521	222.983	11.9255	10.0721	3.76922	0.0371963	8.86741	2.89733	27.651	241.371	83.1143	222.983	10.9988	1.90321	1.16415	0.507309	1.10251	0.237585	0.366659	2.79571	2.97096	NA	24.617	25.7213	13.5013	3.83236	23.2517	1.24354	1.05028
139	VAC 021E					Day28			2.43	2.88708	1.54497	1.98204	5.96754	3.66045	10.9333	19.4007	NA	324.017	280.661	41.3501	9.24377	316.818	12.1984	17.2343	1.85792	1.48285	2.13803	4.814	15.167	302.339	25.2969	316.818	14.7163	1.67038	0.392111	0.209832	0.269193	0.810488	0.497148	1.48491	2.63492	NA	44.0066	38.1183	5.61601	1.25545	43.029	1.65674	2.34069
140	VAC 022A	21	f	2018		Base line			2.25	17.7286	4.75087	6.61063	4.50318	1.49695	27.0688	6.49121	NA	64.0711	123.53	40.2556	19.3782	112.75	19.9541	11.3811	5.87622	0	9.6967	3.00007	16.78	93.8003	29.8169	112.75	15.6676	2.93811	2.60045	0.696864	0.969656	0.660532	0.219575	3.97049	0.95214	NA	9.39804	18.1195	5.90474	2.84241	16.5383	2.92689	1.6694
141	VAC 022B					Day0			3.03	20.8293	21.159	5.9122	1.28852	2.17996	28.0556	20.3985	13.3676	93.9852	215.891	78.5104	43.1492	127.184	33.8606	36.6078	0.015783	1.91992	15.9668	1.73424	20.6073	154.938	60.8298	127.184	35.2342	0.96785	2.26877	2.30468	0.643968	0.140348	0.237445	3.05587	2.22185	1.45603	10.237	23.5152	8.5515	4.69989	13.8531	3.68815	3.98739
142	VAC 022C					Day3			4.47	54.6063	12.6163	15.4108	2.46709	3.49686	72.8794	44.8804	26.0809	137.093	265.676	74.7263	69.7997	225.683	21.0183	20.0845	4.59815	0	27.5445	2.98198	47.9469	201.384	72.263	225.683	20.5514	2.29908	4.03174	0.931496	1.13783	0.182153	0.258183	5.38089	3.31365	1.92563	10.1219	19.6156	5.51726	5.15351	16.6629	1.55184	1.4829
143	VAC 022D					Day7			2.4	18.8929	9.65107	10.9608	2.47993	1.23823	16.2629	6.95751	0.935305	42.1401	154.389	58.604	42.3728	117.132	11.1712	12.1938	0.127642	2.58337	13.1683	1.85908	8.05191	98.2646	50.4884	117.132	11.6825	1.35551	2.59803	1.32716	1.50726	0.341024	0.170274	2.23637	0.956754	0.128617	5.79484	21.2306	8.05886	5.82684	16.1072	1.5362	1.67681
144	VAC 022E					Day28			4.08	44.3051	2.15874	3.5075	0	1.67037	51.2489	15.7012	NA	190.077	186.986	115.093	79.1228	200.226	31.6414	31.9674	0	0	16.6571	0.835184	33.475	188.532	97.1077	200.226	31.8044	0	3.58386	0.174622	0.283723	0	0.135117	4.14555	1.27007	NA	15.3754	15.1254	9.3099	6.40027	16.1964	2.55949	2.58586
145	VAC 023A	29	m	2018		Base line	common cold		4.59	7.68388	5.70097	0	3.31991	2.30782	116.499	104.011	125.734	333.933	482.669	89.1536	16.7295	286.009	9.09649	21.0925	0	0	4.46162	2.81387	115.415	408.301	52.9416	286.009	15.0945	0	0.552491	0.409915	0	0.23871	0.165939	8.3766	7.47865	9.04059	24.0107	34.7052	6.41038	1.2029	20.5648	0.654062	1.5166
146	VAC 023B					Day0	common cold		3.6	31.7959	0	2.89327	22.7755	11.2793	4.5131	38.9554	11.3188	207.756	337.351	131.572	70.0443	289.814	26.9178	38.8515	7.07391	0	11.563	17.0274	18.2625	272.553	100.808	289.814	32.8846	3.53695	2.91491	0	0.265243	2.08797	1.03404	0.413742	3.57127	1.03766	19.0462	30.9269	12.0619	6.42137	26.5689	2.46771	3.56175
147	VAC 023C					Day3			2.1	11.3554	0	3.14358	1.17197	2.68976	63.201	27.6638	69.428	102.976	131.014	70.8268	18.8935	89.0119	17.5129	25.4917	0.0218255	0	4.833	1.93087	53.4309	116.995	44.8601	89.0119	21.5023	0.0109127	1.7846	0	0.494041	0.184186	0.422719	9.93258	4.34761	10.9112	16.1835	20.59	11.131	2.96927	13.989	2.7523	4.00625
148	VAC 023D					Day7				NA	NA	NA	NA	NA	NA	NA	NA	NA	NA	NA	NA	NA	NA	NA	NA	NA	NA	NA	NA	NA	NA	NA	NA	NA	1.67113	0.612607	0.406094	0.285922	0.37287	13.0702	6.25736	6.93663	15.8219	20.7594	3.68674	1.79746	16.8672	0.395867	2.25369
149	VAC 023E					Day28			4.335	17.7299	5.20669	3.80832	0	0	109.321	62.642	110.938	254.405	367.607	72.9028	20.3442	285.022	0.132477	16.5673	4.91214	0	8.91497	0	94.3003	311.006	46.6235	285.022	8.34987	2.45607	1.34982	0.396396	0.289936	0	0	8.32284	4.76907	8.44595	19.3684	27.9867	5.55025	1.54885	21.6994	0.0100857	1.2613
150	VAC 024A	22	f	2018		Base line			5.12	33.9317	32.365	12.7327	11.715	4.81772	58.0825	22.0108	NA	269.189	444.068	185.808	89.2208	335.358	34.2271	33.9057	4.88749	9.83125	26.3431	8.26637	40.0467	356.628	137.514	335.358	34.0664	7.35937	2.18722	2.08623	0.820745	0.755145	0.310548	3.74397	1.41881	NA	17.3518	28.6244	11.9771	5.75114	21.617	2.20626	2.18555
151	VAC 024B					Day0			3.6	31.4532	15.2806	4.9625	12.9187	0	26.5009	10.6879	NA	198.051	231.985	151.365	35.1511	253.018	17.5215	13.3458	3.10101	0	17.2321	6.45934	18.5944	215.018	93.2583	253.018	15.4337	1.55051	2.8835	1.40086	0.454941	1.18433	0	2.42949	0.979819	NA	18.1565	21.2675	13.8766	3.22251	23.1957	1.6063	1.22349
152	VAC 024C					Day3			4.26667	33.0031	50.0772	0	4.73509	5.15882	7.1766	25.4045	12.8717	259.977	336.04	135.883	87.6608	290.26	23.1439	23.6137	0	0	27.6934	4.94695	15.1509	298.009	111.772	290.26	23.3788	0	2.55284	3.87355	0	0.366266	0.399042	0.555121	1.96508	0.995644	20.1096	25.9932	10.5108	6.7807	22.4521	1.79022	1.82655
153	VAC 024D					Day7			7.56316	40.1627	32.2055	11.1708	15.2276	16.4451	51.9105	52.006	NA	514.726	859.303	221.751	73.2647	667.355	45.8014	56.944	8.69549	0	27.8463	15.8364	51.9582	687.014	147.508	667.355	51.3727	4.34775	1.75258	1.40535	0.487459	0.664487	0.717615	2.26521	2.26938	NA	22.4611	37.4973	9.67651	3.19705	29.1213	1.99863	2.48486
154	VAC 024E					Day28			2.865	43.1251	34.0293	5.43386	8.23403	2.16908	16.9605	23.369	NA	258.842	288.395	83.2412	55.3655	203.119	5.66246	11.7464	8.06868	9.47639	27.5294	5.20155	20.1647	273.619	69.3034	203.119	8.70445	8.77254	4.96779	3.92	0.625953	0.948517	0.249866	1.95376	2.69199	NA	29.8173	33.2216	9.58895	6.37782	23.3983	0.652286	1.35313
155	VAC 025A	26	m	2018		Base line	influenza by self report		4.7	35.0212	14.7857	7.95227	11.8481	4.67547	97.3554	38.6211	NA	260.483	348.175	105.553	58.5037	286.624	19.6907	26.1943	8.00343	0	19.2531	8.26179	67.9883	304.329	82.0285	286.624	22.9425	4.00172	2.45918	1.03825	0.558407	0.831971	0.328311	6.83628	2.71197	NA	18.2911	24.4488	7.41193	4.10812	20.1267	1.38268	1.83936
156	VAC 025B					Day0	influenza by self report		3.98	27.2217	16.8619	7.54733	0.831247	0	100.451	40.168	NA	221.675	328.338	76.4501	53.8007	207.417	12.5996	15.8404	0	0	17.2103	0.415624	70.3093	275.006	65.1254	207.417	14.22	0	2.2573	1.39824	0.625846	0.0689294	0	8.32965	3.33085	NA	18.3819	27.2267	6.33946	4.46131	17.1996	1.0448	1.31354
157	VAC 025C					Day3			3.49286	21.9938	9.36453	6.87826	0	0	78.8585	10.712	77.0366	144.904	167.18	62.1749	44.1312	214.983	11.9871	2.35316	0	6.28172	12.7455	0	55.5357	156.042	53.153	214.983	7.17014	3.14086	2.07815	0.884835	0.649912	0	0	7.45118	1.01215	7.27903	13.6917	15.7965	5.87478	4.16986	20.3134	1.13264	0.222346
158	VAC 025D					Day7			6.32	101.156	61.639	38.7773	12.2375	1.51546	111.49	47.5391	73.5208	282.259	433.308	136.528	67.4147	390.137	19.0899	22.7639	4.0036	0.0342477	67.1908	6.87647	77.5166	357.783	101.972	390.137	20.9269	2.01892	5.28242	3.21882	2.02497	0.639046	0.0791379	5.82205	2.48251	3.83929	14.7397	22.6275	7.12957	3.52042	20.3731	0.996883	1.18874
159	VAC 025E					Day28			6.53077	25.1836	1.33305	1.9754	5.06883	2.90173	235.657	61.8557	224.348	830.446	625.901	104.339	77.4732	499.009	34.2117	32.4294	0	4.10352	9.49733	3.98528	173.954	728.173	90.9062	499.009	33.3206	2.05176	1.27265	0.067366	0.0998269	0.256154	0.146639	11.9089	3.12588	11.3375	41.9666	31.63	5.27279	3.91511	25.2174	1.72889	1.63882
160	VAC 026A	24	f	2018		Base line			2.625	20.0283	9.95576	2.77297	3.41419	4.62556	19.9624	12.959	6.03242	128.925	101.057	80.6384	44.7378	156.548	6.41864	17.328	1.34173	1.5013	10.919	4.01987	12.9846	114.991	62.6881	156.548	11.8733	1.42152	2.5181	1.25171	0.348636	0.429255	0.581557	2.5098	1.62929	0.758438	16.2094	12.7056	10.1384	5.62474	19.6823	0.806995	2.17859
161	VAC 026B					Day0			1.98857	16.7154	1.56794	2.14063	2.12691	0	7.56438	0	84.1929	76.056	61.4051	85.2332	31.431	99.279	2.52329	9.97499	2.60395	0	6.80798	1.06346	30.5858	68.7305	58.3321	99.279	6.24914	1.30198	2.77417	0.260223	0.35527	0.352993	0	1.25542	0	13.9731	12.6226	10.1911	14.1457	5.21645	16.4768	0.418777	1.6555
162	VAC 026C					Day3			2.44	44.2407	3.1407	0	0	5.58399	30.3557	16.3282	NA	82.1733	NA	128.92	55.4401	97.9919	15.037	10.4578	0	0	15.7938	2.79199	23.3419	82.1733	92.1799	97.9919	12.7474	0	5.98398	0.424809	0	0	0.755287	4.10589	2.20854	NA	11.1147	NA	17.4376	7.49879	13.2543	2.0339	1.41451
163	VAC 026D					Day7			2.57368	38.4463	10.0782	2.8623	7.1515	2.45388	6.08513	3.63311	NA	54.8799	61.9916	64.5028	27.7009	79.7024	9.22707	10.747	2.72224	0	17.1289	4.80269	4.85912	58.4358	46.1018	79.7024	9.98702	1.36112	4.93011	1.29237	0.367043	0.917063	0.314669	0.780319	0.465888	NA	7.03745	7.94941	8.27143	3.55219	10.2205	1.18322	1.37812
164	VAC 026E					Day28			3.54	38.1818	19.1492	3.2225	32.7703	21.051	26.1089	28.9004	NA	454.757	326.843	83.5517	50.9042	302.39	61.0827	84.6632	2.38306	0	20.1845	26.9106	27.5046	390.8	67.2279	302.39	72.873	1.19153	3.55968	1.78527	0.300433	3.05517	1.96258	2.43412	2.69438	NA	42.3968	30.4715	7.7895	4.74578	28.1917	5.69472	7.89312
165	VAC 027A	21	f	2018		Base line			3.9	22.1181	0.820625	7.00636	5.96146	0	48.1338	34.7723	14.6405	177.038	265.429	228.211	60.0498	285.386	22.7445	34.7444	0.0764904	0	9.9817	2.98073	32.5155	221.234	144.13	285.386	28.7444	0.0382452	1.87172	0.0694444	0.592905	0.504482	0	4.07326	2.94257	1.23894	14.9816	22.4616	19.3121	5.08165	24.1505	1.92473	2.9402
166	VAC 027B					Day0		Purple	3.97895	30.7472	1.91479	2.03699	0.0554232	1.37847	39.9983	20.6329	46.8426	198.46	228.004	216.386	62.8369	238.492	27.3369	24.2281	0.069094	0	11.5663	0.716947	35.8246	213.232	139.611	238.492	25.7825	0.034547	2.55032	0.158822	0.168958	0.00459707	0.114337	3.31765	1.71139	3.88535	16.4612	18.9118	17.9481	5.212	19.7816	2.26745	2.0096
167	VAC 027C					Day3			4.71429	15.7685	4.82874	9.30808	6.42868	0	56.0275	13.2348	87.3773	262.079	375.803	325.353	47.9071	405.447	31.3216	48.2978	0.227228	0.0297441	9.96845	3.21434	52.2132	318.941	186.63	405.447	39.8097	0.128486	1.10391	0.338045	0.651631	0.450053	0	3.92232	0.926531	6.11702	18.3474	26.3088	22.777	3.35383	28.3841	2.19273	3.38118
168	VAC 027D					Day7			5.445	76.2434	25.7034	14.2569	0	0.0385349	72.6812	41.8486	57.1424	354.983	448.609	253.944	84.3758	367.63	27.5939	49.5537	0.210143	0	38.7346	0.0192675	57.2241	401.796	169.16	367.63	38.5738	0.105072	4.62128	1.55794	0.864142	0	0.00233569	4.40536	2.53653	3.46352	21.5163	27.1911	15.3921	5.11419	22.2829	1.67253	3.00356
169	VAC 027E					Day28			3.45405	18.8417	5.68364	1.63564	0	3.59291	32.0046	13.9335	27.2562	130.357	183.733	129.912	39.2625	202.232	13.1732	29.2093	0.718714	1.54583	8.72032	1.79645	24.3981	157.045	84.5873	202.232	21.1912	1.13227	1.80031	0.543068	0.156285	0	0.3433	3.05802	1.33134	2.60431	12.4555	17.5556	12.413	3.75151	19.3232	1.25869	2.79093
170	VAC 028A	26	f	2018		Base line			2.55	24.4274	1.57225	2.3889	0.560181	5.2197	13.7133	12.2441	NA	112.404	153.207	90.3589	34.7597	164.736	14.2804	5.22175	0	0	9.46286	2.88994	12.9787	132.806	62.5593	164.736	9.75107	0	3.16151	0.203488	0.309182	0.0725013	0.675559	1.77484	1.58469	NA	14.5479	19.8288	11.6947	4.49876	21.3209	1.84824	0.675823
171	VAC 028B					Day0			2.4	43.8706	17.4881	7.08461	11.546	0.0100741	9.83231	12.4743	6.12522	115.018	185.829	122.832	19.9094	192.947	17.5608	21.1445	4.4581	10.1567	22.8144	5.77803	9.47727	150.423	71.3708	192.947	19.3526	7.3074	6.03281	2.40486	0.974231	1.58773	0.00138533	1.35208	1.71538	0.842302	15.8165	25.5541	16.8911	2.73781	26.5328	2.41485	2.90766
172	VAC 028C					Day3			2.01	16.5765	NA	0.0497574	0	0.0447454	0.425597	0	NA	75.5847	NA	33.4096	0	73.5145	15.6814	NA	0	0	8.31315	0.0223727	0.212799	75.5847	16.7048	73.5145	15.6814	0	2.7218	NA	0.00816993	0	0.007347	0.0698812	0	NA	12.4107	NA	5.48571	0	12.0707	2.57481	NA
173	VAC 028D					Day7			1.32	28.8824	11.0704	3.17768	1.62754	0	0.0356058	0.295413	NA	30.1442	48.1291	82.0518	18.271	59.478	15.5399	5.09542	0.0387859	0	14.3768	0.813768	0.16551	39.1367	50.1614	59.478	10.3177	0.0193929	7.22131	2.76788	0.794499	0.406925	0	0.00890234	0.0738607	NA	7.5368	12.0335	20.515	4.5682	14.871	3.88536	1.27398
174	VAC 028E					Day28			3.105	36.3082	6.19048	4.94942	4.87575	2.5432	30.8775	16.4753	6.17941	302.292	246.08	141.168	46.378	233.311	7.68555	9.34069	0.681389	0	15.816	3.70948	17.8441	274.186	93.773	233.311	8.51312	0.340695	3.85923	0.657991	0.526078	0.518248	0.270319	3.28199	1.75117	0.656814	32.1308	26.1561	15.0049	4.92955	24.7989	0.816903	0.99283
175	VAC 029A	23	m	2018		Base line			7.305	48.0114	8.24253	8.4719	6.43356	2.19282	74.4994	86.1485	66.1684	729.476	764.262	215.429	78.5094	823.922	19.8741	33.9629	0	0	21.5753	4.31319	75.6054	746.869	146.969	823.922	26.9185	0	2.16911	0.37239	0.382753	0.290662	0.0990697	3.36581	3.89211	2.98943	32.957	34.5287	9.73288	3.54698	37.224	0.897894	1.53441
176	VAC 029B					Day0			7.485	37.8757	3.91884	4.10668	6.44869	2.29278	65.161	76.5381	57.9434	496.375	629.865	178.707	91.2321	691.872	15.88	19.7143	3.02035	0	15.3004	4.37074	66.5475	563.12	134.969	691.872	17.7971	1.51017	1.67004	0.172792	0.181074	0.284339	0.101095	2.87312	3.37476	2.55488	21.8865	27.7724	7.87963	4.02266	30.5064	0.700189	0.869254
177	VAC 029C					Day3			6.855	92.9025	31.0102	32.935	0	3.24726	90.5505	66.9993	23.0212	524.088	477.778	178.003	71.2924	628.418	23.3061	28.5359	0	0	52.2826	1.62363	60.1903	500.933	124.648	628.418	25.921	0	4.47278	1.49298	1.58565	0	0.156339	4.35954	3.22567	1.10835	25.2322	23.0026	8.56992	3.43236	30.2551	1.12207	1.37386
178	VAC 029D					Day7			4.89	92.8529	30.1579	34.8268	1.54481	2.58624	54.2134	30.3302	19.457	333.482	281.747	108.067	47.597	402.339	7.92611	10.6347	3.12581	0	52.6125	2.06553	34.6669	307.615	77.832	402.339	9.28042	1.56291	6.26677	2.0354	2.35051	0.104261	0.174549	3.65894	2.04703	1.31318	22.5072	19.0155	7.29359	3.21239	27.1545	0.534944	0.717753
179	VAC 029E					Day28			7.77	39.9367	12.918	10.666	6.70198	0.0319705	48.4795	107.676	46.4128	756.652	816.48	154.965	56.6734	936.31	7.84256	51.7816	3.91969	0	21.1736	3.36698	67.5228	786.566	105.819	936.31	29.8121	1.95985	1.69632	0.548697	0.453042	0.284669	0.00135796	2.05918	4.57358	1.9714	32.139	34.6802	6.5822	2.40722	39.7701	0.333115	2.19944
180	VAC 030A	32	f	2018		Base line			2.595	15.1382	4.50241	0.0863148	7.02825	4.97711	25.2831	13.9009	NA	95.8863	146.627	82.9809	32.1165	144.398	18.4005	19.0142	0.0634305	0	6.57565	6.00268	19.592	121.256	57.5487	144.398	18.7074	0.0317153	1.92528	0.572618	0.0109776	0.893855	0.63299	3.21551	1.76792	NA	12.1949	18.648	10.5535	4.08459	18.3646	2.34018	2.41824
181	VAC 030B					Day0			1.53	7.67917	1.01294	2.03854	3.03662	2.84494	11.2749	5.43174	NA	115.329	94.5222	46.2797	14.5267	125.986	5.10687	8.0377	1.7657	0.0490779	3.57688	2.94078	8.35334	104.926	30.4032	125.986	6.57228	0.907391	1.65646	0.2185	0.439729	0.655022	0.613676	2.43209	1.17167	NA	24.8774	20.3892	9.9829	3.13351	27.1762	1.10159	1.7338
182	VAC 030C					Day3			3.39	240.313	237.65	123.068	8.40208	10.6892	20.7276	18.5998	NA	84.398	141.143	90.6848	24.8009	87.4206	17.1277	18.4838	7.41239	0	200.344	9.54567	19.6637	112.771	57.7428	87.4206	17.8058	3.7062	23.3957	23.1364	11.9812	0.817984	1.04065	2.01794	1.81078	NA	8.21655	13.741	8.82861	2.41449	8.51082	1.66747	1.79949
183	VAC 030D					Day7			2.085	26.4082	18.6818	9.37479	4.74417	0.0311409	11.5076	1.42833	NA	35.8989	42.6935	57.092	18.8217	78.639	8.79338	4.50017	2.47262	0	18.1549	2.38766	6.46798	39.2962	37.9569	78.639	6.64678	1.23631	4.18013	2.95712	1.48393	0.750951	0.00492927	1.82153	0.22609	NA	5.68241	6.75791	9.03705	2.97927	12.4477	1.3919	0.712329
184	VAC 030E					Day28			1.77	19.896	0.150522	3.24861	3.14543	10.394	5.83844	6.97501	NA	92.622	63.8519	43.301	34.9671	70.4981	14.217	32.2825	3.46037	0	7.76505	6.76974	6.40672	78.2369	39.1341	70.4981	23.2498	1.73019	3.7098	0.0280662	0.605733	0.586496	1.93807	1.08863	1.30056	NA	17.2702	11.9058	8.07387	6.51994	13.145	2.6509	6.01937
185	VAC 031A	21	f	2018		Base line			2.79	20.3826	9.09	12.5433	4.75886	4.70915	13.2334	8.11095	NA	75.0072	139.154	66.3538	30.2416	173.502	16.6447	20.5203	0.0768553	2.49937	14.0053	4.734	10.6722	107.081	48.2977	173.502	18.5825	1.28811	2.41108	1.07527	1.48377	0.562932	0.557052	1.5654	0.959455	NA	8.87271	16.4607	7.84908	3.57732	20.5238	1.96892	2.42738
186	VAC 031B					Day0			2.745	23.2101	7.16684	3.4682	8.59442	4.98026	2.80804	10.1255	0	110.31	125.871	63.2621	44.081	157.882	15.3129	19.2804	6.114	1.83269	11.2817	6.78734	4.31118	118.09	53.6716	157.882	17.2967	3.97335	2.79056	0.861674	0.416984	1.03331	0.59878	0.337612	1.21739	0	13.2626	15.1336	7.60604	5.29988	18.9823	1.84108	2.3181
187	VAC 031C					Day3			4.05	29.6401	10.0577	4.24774	6.84505	5.2246	16.6793	19.8963	9.73929	220.405	306.861	81.0232	51.6353	331.338	20.0115	23.9299	0.0683908	0.0700638	14.6485	6.03482	15.4383	263.633	66.3293	331.338	21.9707	0.0692273	2.41536	0.819597	0.346147	0.5578	0.425751	1.35919	1.62135	0.793651	17.9607	25.006	6.60255	4.20775	27.0006	1.63073	1.95004
188	VAC 031D					Day7			3.255	108.171	71.7543	71.1524	6.02318	6.3777	2.0899	10.473	0	132.801	153.11	66.4699	28.9687	181.348	28.9326	32.2433	4.24913	0.0255854	83.6925	6.20044	4.18765	142.955	47.7193	181.348	30.5879	2.13736	10.9677	7.27535	7.21433	0.610706	0.646652	0.211901	1.06189	0	13.4651	15.5242	6.73955	2.93721	18.3874	2.93355	3.26923
189	VAC 031E					Day28			1.005	7.57736	NA	0	7.92048	0	NA	NA	NA	39.2119	NA	NA	0	76.0329	NA	NA	0	0	3.78868	3.96024	NaN	39.2119	0	76.0329	NaN	0	2.48834	NA	0	2.60101	0	NA	NA	NA	12.8769	NA	NA	0	24.9685	NA	NA
190	VAC 032A	24	f	2018		Base line			7.11	27.4012	20.0311	1.89969	4.63942	3.53417	3.2077	14.6372	7.35266	89.6537	199.799	154.131	29.0126	162.289	24.9945	27.8327	7.96429	1.73942	16.444	4.0868	8.3992	144.726	91.572	162.289	26.4136	4.85185	1.27191	0.929806	0.0881799	0.215353	0.16405	0.148896	0.679433	0.341297	4.16156	9.27429	7.15449	1.34671	7.53313	1.1602	1.29194
191	VAC 032B					Day0			6.18333	20.0024	12.2501	1.47579	7.09736	7.21868	11.1571	8.31092	5.50504	75.8152	112.859	98.3289	41.085	134.353	24.1718	13.5178	4.30537	1.61082	11.2427	7.15802	8.32437	94.337	69.707	134.353	18.8448	2.9581	1.06762	0.653842	0.0787696	0.378819	0.385294	0.595508	0.443592	0.29383	4.0466	6.02379	5.24827	2.1929	7.17103	1.29016	0.721509
192	VAC 032C					Day3			7.8	25.7209	11.639	8.8657	5.31031	6.23831	7.64018	9.70491	11.3762	106.319	121.302	157.674	50.7784	212.848	21.6323	27.1307	0.950719	0	15.4085	5.77431	9.57375	113.81	104.226	212.848	24.3815	0.47536	1.0883	0.492466	0.375125	0.22469	0.263955	0.323271	0.410633	0.481348	4.49855	5.1325	6.6715	2.14853	9.00602	0.915303	1.14795
193	VAC 032D					Day7			8.835	140.193	83.0694	56.8351	9.36147	2.91878	5.85946	17.5733	28.5723	130.206	181.928	198.111	67.3378	292.995	33.6414	37.5772	6.42404	4.40038	93.3658	6.14012	17.335	156.067	132.724	292.995	35.6093	5.41221	5.23693	3.10307	2.12309	0.349699	0.109031	0.218881	0.656455	1.06732	4.86387	6.79595	7.40046	2.51541	10.9449	1.25668	1.4037
194	VAC 032E					Day28			4.74	19.8046	5.31184	5.62126	10.4814	7.71442	0.846614	4.19573	NA	80.2936	80.4755	106.359	76.5919	102.774	3.36495	33.3767	0	0	10.2459	9.09793	2.52117	80.3846	91.4757	102.774	18.3708	0	1.37894	0.369849	0.391393	0.729794	0.537134	0.0589474	0.292137	NA	5.59062	5.60329	7.40551	5.33288	7.15586	0.234292	2.32392
195	VAC 033A	24	f	2018		Base line			3.285	21.9158	3.17245	8.60495	2.49379	0.281195	11.2219	15.6518	0	128.932	173.734	74.3268	28.9985	141.549	5.89994	15.3626	3.83542	1.75106	11.2311	1.38749	8.95792	151.333	51.6627	141.549	10.6313	2.79324	2.20181	0.318725	0.86451	0.250543	0.0282508	1.12743	1.57249	0	12.9533	17.4544	7.46737	2.91339	14.2209	0.592748	1.54343
196	VAC 033B					Day0			2.94	24.9115	1.15533	5.92725	10.5443	3.79628	5.82743	10.2057	14.0597	113.321	122.098	55.6313	45.6746	169.136	4.12009	29.6089	1.9499	2.04364	10.6647	7.17027	10.0309	117.71	50.6529	169.136	16.8645	1.99677	2.79647	0.129693	0.66537	1.18366	0.426156	0.654165	1.14565	1.57828	12.721	13.7063	6.24495	5.12725	18.9866	0.462506	3.32379
197	VAC 033C					Day3			3.48	35.753	6.15908	11.0345	15.6363	11.4792	12.4879	15.0318	11.9349	107.147	163.209	125.258	82.5326	209.654	23.9424	41.4211	4.01048	0	17.6489	13.5578	13.1515	135.178	103.895	209.654	32.6818	2.00524	3.39071	0.584109	1.04647	1.4829	1.08866	1.18431	1.42557	1.13187	10.1615	15.4783	11.8791	7.82715	19.8829	2.27063	3.92826
198	VAC 033D					Day7			3.15	56.3148	2.85592	0.877574	0.245929	7.10341	34.8012	17.7971	NA	113.41	NA	151.588	60.1393	132.127	16.547	24.802	0.216748	0.105686	20.0161	3.67467	26.2992	113.41	105.864	132.127	20.6745	0.161217	5.90023	0.299222	0.0919456	0.0257666	0.744241	3.64621	1.86464	NA	11.8822	NA	15.8822	6.30094	13.8432	1.73367	2.59857
199	VAC 033E					Day28			2.67	27.8477	NA	0.0522195	0	3.11348	3.17327	2.14337	NA	193.459	NA	47.8836	34.302	162.832	10.66	26.1894	4.18917	0	13.95	1.55674	2.65832	193.459	41.0928	162.832	18.4247	2.09459	1.54711	NA	1.19809	0.723214	0.183955	1.07537	0.748848	NA	7.95146	NA	13.4502	3.58169	19.0275	0.517967	1.62683
200	VAC 035A	22	f	2018		Base line			4.515	19.2983	6.22501	3.30855	0.0403101	1.9029	40.83	32.0235	43.0504	130.114	213.25	96.266	53.6872	176.603	7.44263	5.7612	2.42998	0	9.61064	0.971608	38.6346	171.682	74.9766	176.603	6.60191	1.21499	1.41065	0.45503	0.241845	0.00294655	0.139097	2.98455	2.34083	3.14685	9.51094	15.5879	7.03676	3.92438	12.9091	0.544034	0.421127
201	VAC 035B					Day0			3.075	13.5288	0	3.33527	9.58671	0	22.8577	17.9426	9.1674	85.6184	128.483	68.0568	48.9557	129.686	13.6317	11.1974	0.043234	4.46954	5.62135	4.79336	16.6559	107.051	58.5062	129.686	12.4146	2.25639	1.45201	0	0.357967	1.02892	0	2.45327	1.92574	0.983917	9.18924	13.7898	7.30438	5.25431	13.9189	1.46306	1.2018
202	VAC 035C					Day3			3.84	13.9862	2.69863	6.73142	10.3207	2.04741	14.7287	27.7008	33.0703	110.305	169.615	84.3443	61.5419	151.503	14.4398	6.77251	4.52933	0	7.80541	6.18406	25.1666	139.96	72.9431	151.503	10.6062	2.26466	1.20206	0.231936	0.57854	0.887025	0.175967	1.26588	2.38078	2.84226	9.48025	14.5778	7.24906	5.28929	13.0211	1.24105	0.582071
203	VAC 035D					Day7			2.445	14.2029	8.06953	2.7542	3.4429	0	25.7357	12.3076	27.4014	93.0641	78.896	50.1773	22.393	102.139	5.67444	3.35627	2.34152	0	8.34222	1.72145	21.8149	85.98	36.2851	102.139	4.51535	1.17076	1.91715	1.08925	0.37177	0.464732	0	3.47387	1.66131	3.69872	12.5621	10.6496	6.77307	3.02267	13.787	0.765952	0.453039
204	VAC 035E					Day28			3.39	11.8034	4.06259	6.09153	4.75364	3.44479	44.146	28.7823	13.6542	261.837	214.542	65.9793	61.9775	188.283	13.6497	24.3393	2.36376	2.07176	7.31919	4.09921	28.8608	238.189	63.9784	188.283	18.9945	2.21776	1.14912	0.395513	0.59304	0.46279	0.335367	4.29783	2.8021	1.32931	25.4911	20.8867	6.42341	6.03381	18.3303	1.32887	2.36955
205	VAC 036A	21	m	2018		Base line			3.915	26.863	2.98489	5.69048	4.60663	2.01169	63.3827	36.1224	67.4449	188.339	248.194	122.698	50.8298	271.078	3.18556	16.8433	4.12856	3.50901	11.8461	3.30916	55.65	218.266	86.7638	271.078	10.0144	3.81879	2.26454	0.251625	0.479706	0.388337	0.169585	5.34314	3.0451	5.68558	15.8769	20.9226	10.3434	4.28494	22.8518	0.268541	1.41989
206	VAC 036B					Day0			5.115	17.514	5.89996	2.6722	9.76067	0.0161734	48.126	27.6917	43.1912	231.302	305.675	134.385	103.424	285.994	16.1459	15.8616	0	2.40567	8.69539	4.88842	39.6697	268.489	118.904	285.994	16.0038	1.20284	1.13005	0.38068	0.172417	0.629784	0.00104355	3.10521	1.78674	2.78681	14.9242	19.7229	8.67085	6.67318	18.4531	1.04178	1.02343
207	VAC 036C					Day3			4.02	16.3193	1.67892	6.06484	0.288534	5.7369	31.5282	23.0573	59.9246	106.471	142.302	111.192	36.9563	185.664	6.65903	9.25097	0	0	8.02102	3.01272	38.17	124.387	74.0742	185.664	7.955	0	1.33978	0.137836	0.49791	0.023688	0.470987	2.58839	1.89295	4.91968	8.74105	11.6827	9.12863	3.03403	15.2426	0.546691	0.759484
208	VAC 036D					Day7			5.205	127.831	96.6528	42.9349	12.2777	5.97905	53.6925	44.5519	79.0634	174.856	284.099	144.907	73.5963	217.764	25.1044	28.6515	2.66835	0	89.1394	9.12836	59.1026	229.478	109.252	217.764	26.8779	1.33418	8.10534	6.12845	2.72237	0.778489	0.379113	3.40448	2.8249	5.01317	11.0871	18.0139	9.18809	4.66652	13.8078	1.59179	1.8167
209	VAC 036E					Day28			4.32	38.8518	1.8658	7.65352	4.79958	2.29814	71.2366	30.7728	28.8174	360.471	288.84	147.196	73.7416	265.929	21.5271	19.1466	2.01761	4.64995	16.1237	3.54886	43.6089	324.656	110.469	265.929	20.3368	3.33378	2.96814	0.14254	0.584703	0.366671	0.17557	5.44223	2.35093	2.20155	27.5388	22.0664	11.2453	5.6336	20.3161	1.6446	1.46273
210	VAC 037A	20	f	2018		Base line			4.305	23.2365	6.1978	4.83149	7.14367	1.73933	39.5715	26.1086	4.64459	439.911	686.561	79.0297	40.4924	543.77	8.78496	10.6606	2.35865	0.0116559	11.4219	4.4415	23.4416	563.236	59.7611	543.77	9.72278	1.18516	1.78137	0.47514	0.370395	0.547653	0.133342	3.03366	2.00156	0.356067	33.7248	52.6336	6.05863	3.10426	41.6869	0.673479	0.817271
211	VAC 037B					Day0			4.215	20.1519	18.676	7.73833	14.2836	1.76404	26.5287	20.971	22.0827	295.532	446.895	105.373	64.1271	434.465	8.44632	31.6122	0.1131	0	15.5221	8.02384	23.1941	371.214	84.7501	434.465	20.0293	0.0565499	1.57789	1.46233	0.605909	1.1184	0.138124	2.07719	1.64202	1.72907	23.14	34.9917	8.25068	5.02113	34.0185	0.661344	2.47522
212	VAC 037C					Day3			3.24	53.3788	7.32781	8.63683	11.4716	8.75396	20.1128	21.6215	14.5961	221.419	366.392	61.9896	42.7397	335.832	10.3962	28.9761	2.77925	0.0218147	23.1145	10.1128	18.7768	293.906	52.3646	335.832	19.6861	1.40053	5.43727	0.746426	0.879765	1.16852	0.891696	2.04874	2.20241	1.48678	22.5542	37.3215	6.31439	4.35355	34.2085	1.05897	2.95156
213	VAC 037D					Day7			4.71	110.577	50.4529	45.3409	0	3.01184	18.7679	53.3348	3.15214	341.457	464.216	106.056	74.6474	420.201	16.7994	23.298	0.0691942	2.1262	68.7903	1.50592	25.085	402.837	90.3516	420.201	20.0487	1.0977	7.74822	3.53527	3.17707	0	0.211042	1.31508	3.73721	0.220872	23.9261	32.528	7.4314	5.2306	29.4438	1.17714	1.63251
214	VAC 037E					Day28			3.615	35.8619	0	1.89092	3.75872	11.37	44.5842	17.0523	NA	424.11	311.452	72.7919	46.5402	294.703	14.5188	20.7259	0	0	12.5843	7.56435	30.8182	367.781	59.666	294.703	17.6223	0	3.27403	0	0.172633	0.343154	1.03803	4.07034	1.55679	NA	38.7193	28.4341	6.64557	4.2489	26.905	1.3255	1.89218
215	VAC 041A	34	f	2019	responder	Base line			2.73	26.2774	NA	8.18688	7.61385	9.6515	25.5427	27.0576	NA	NA	NA	NA	40.95	252.542	30.923	NA	3.50876	NA	17.2321	8.63267	26.3002	NA	40.95	252.542	30.923	3.50876	3.1767	NA	0.989722	0.920447	1.16678	3.08789	3.27103	NA	NA	NA	NA	4.9505	30.5301	3.73832	NA
216	VAC 041B					Day3			3.465	51.6684	5.89961	7.01589	36.0303	23.5672	114.551	71.9893	40.0915	360.95	313.843	99.7522	54.8524	265.824	75.2846	86.5774	3.5636	0.363537	21.528	29.7988	75.5439	337.396	77.3023	265.824	80.931	1.96357	4.9213	0.561924	0.668247	3.4318	2.24472	10.9107	6.85681	3.81862	34.3796	29.8928	9.50116	5.22456	25.3191	7.17068	8.2463
217	VAC 041C					Day7			4.29	39.5553	0	14.9701	36.5618	0.0538471	184.57	112.94	216.314	435.277	257.989	137.216	96.4697	340.059	48.1361	73.5509	14.7611	6.50748	18.1751	18.3078	171.275	346.633	116.843	340.059	60.8435	10.6343	3.04302	0	1.15166	2.81273	0.0041425	14.1991	8.68852	16.6412	33.4862	19.8473	10.5562	7.42149	26.161	3.70315	5.65832
218	VAC 041D					Day11			2.13	51.4593	51.7982	42.0273	64.1971	44.5796	131.839	46.3231	351.373	330.907	291.048	104.876	119.446	153.165	65.09	37.8398	22.2535	22.1007	48.4282	54.3884	176.512	310.977	112.161	153.165	51.4649	22.1771	7.97336	8.02587	6.51193	9.94703	6.90739	20.4279	7.17754	54.4434	51.2724	45.0964	16.25	18.5075	23.7321	10.0854	5.86309
219	VAC 041E					Day28			2.82	14.2653	0.0563442	4.90483	10.0678	5.63866	46.634	47.7693	NA	408.955	315.58	107.476	40.3947	229.971	26.7194	28.8104	2.07885	0	6.40882	7.85324	47.2017	362.268	73.9355	229.971	27.7649	1.03942	1.66951	0.00659413	0.574027	1.17827	0.659909	5.45772	5.59058	NA	47.8612	36.9333	12.5783	4.72751	26.9142	3.12705	3.37177
220	VAC 042A	22	f	2019	responder	Base line			3.57	18.7316	12.4573	4.89643	9.73215	4.37263	13.6163	25.6534	2.21209	315.732	247.746	73.4947	48.3284	247.426	22.0433	22.2188	5.6078	0	12.0285	7.05239	13.8273	281.739	60.9115	247.426	22.131	2.8039	1.73167	1.15163	0.452657	0.899701	0.404233	1.25877	2.37156	0.204499	29.1882	22.9032	6.7943	4.46778	22.8736	2.03782	2.05404
221	VAC 042B					Day3			3.915	51.4963	0	18.2162	7.19248	6.0199	56.0743	0.498318	NA	194.67	185.692	167.402	62.5406	201.706	43.6593	47.1027	8.94132	10.9116	23.2375	6.60619	28.2863	190.181	114.971	201.706	45.381	9.92645	4.34112	0	1.53562	0.606323	0.507475	4.72704	0.042008	NA	16.4106	15.6538	14.1119	5.27215	17.0037	3.68046	3.97074
222	VAC 042C					Day7			7.53	68.9955	40.1132	13.6076	85.5015	26.7466	68.891	59.887	6.05196	951.432	849.665	70.2649	78.3459	769.745	191.701	98.1185	6.80217	14.7994	40.9055	56.124	44.9433	900.548	74.3054	769.745	144.91	10.8008	3.02401	1.75812	0.59641	3.74745	1.17228	3.01943	2.62479	0.265252	41.7004	37.24	3.07965	3.43383	33.7372	8.40209	4.30044
223	VAC 042D					Day11			1.92	58.7236	50.629	28.4745	49.4359	55.4111	14.6911	7.46145	363.365	288.1	226.298	85.8776	127.404	154.238	50.0424	50.1437	30.4436	20.2644	45.9423	52.4235	128.506	257.199	106.641	154.238	50.0931	25.354	10.0941	8.70272	4.89454	8.49764	9.52474	2.52528	1.28257	62.4595	49.5222	38.8989	14.7617	21.8997	26.5123	8.6019	8.61931
224	VAC 042E					Day28			3.27	33.0813	0.155291	1.78427	16.7453	7.94249	27.5249	28.8911	34.4157	355.601	253.6	73.3723	37.1207	302.534	52.6458	40.8044	2.1921	2.3333	11.6736	12.3439	30.2772	304.601	55.2465	302.534	46.7251	2.2627	3.33881	0.0156732	0.180082	1.69007	0.801615	2.77802	2.9159	3.47349	35.8899	25.5952	7.40528	3.7465	30.534	5.31341	4.11828
225	VAC 043A	64	f	2019	responder	Base line			4.71	25.5831	16.9392	9.31993	16.4182	7.79073	28.5237	47.3825	NA	473.565	428.321	135.547	79.7417	354.969	41.8854	50.8704	7.96717	1.00149	17.2808	12.1045	37.9531	450.943	107.645	354.969	46.3779	4.48433	1.79263	1.18694	0.653054	1.15044	0.545902	1.99867	3.32012	NA	33.183	30.0128	9.49791	5.58756	24.8729	2.93494	3.56453
226	VAC 043B					Day3			9.48	89.2879	18.1707	22.9039	40.3616	18.7297	122.947	152.238	24.9995	1360.27	1189.46	200.236	95.818	1250.32	109.34	163.94	3.27916	4.28154	43.4542	29.5456	100.062	1274.87	148.027	1250.32	136.64	3.78035	3.10843	0.632587	0.797368	1.40513	0.652047	4.28024	5.29997	0.870322	47.3559	41.4094	6.97095	3.33577	43.528	3.80651	5.70735
227	VAC 043C					Day7			7.74	155.901	59.6171	61.9114	50.8455	34.1923	85.0889	98.4349	12.5078	1034.57	620.256	338.086	119.543	666.203	75.7491	53.8558	0.590934	15.6989	92.4764	42.5189	65.3439	827.413	228.814	666.203	64.8025	8.14492	6.64759	2.54207	2.6399	2.16805	1.45796	3.62818	4.19726	0.533333	44.114	26.4477	14.4159	5.0973	28.4069	3.22994	2.29641
228	VAC 043D					Day11			2.43	47.9803	41.7309	35.6451	39.0851	35.6833	32.4869	21.891	293.395	366.983	385.403	85.7711	113.419	285.167	53.8525	43.5779	19.075	25.5749	41.7854	37.3842	115.924	376.193	99.595	285.167	48.7152	22.3249	6.5165	5.66772	4.84118	5.30838	4.84636	4.41224	2.97315	39.8477	49.8422	52.3439	11.6491	15.4041	38.7302	7.31404	5.91858
229	VAC 043E					Day28	common cold		5.37	63.8543	23.4327	5.8138	43.9044	9.76247	55.1177	59.4226	NA	831.877	532.456	129.118	100.808	504.027	53.107	100.638	4.04219	4.12366	31.0336	26.8335	57.2701	682.167	114.963	504.027	76.8723	4.08293	3.9244	1.44014	0.357308	2.69831	0.599988	3.38746	3.65203	NA	51.1261	32.724	7.93543	6.19552	30.9768	3.26388	6.18506
230	VAC 044A	60	f	2019	responder	Base line	sinusitis		3.18	31.3701	11.2381	14.7595	39.0059	23.0636	34.6256	39.1032	1.29161	266.772	147.879	101.02	39.7655	250.581	93.1666	95.364	2.5673	4.66618	19.1226	31.0348	25.0068	207.326	70.3928	250.581	94.2653	3.61674	3.25571	1.16634	1.5318	4.04819	2.39364	3.59358	4.05829	0.134048	27.6867	15.3475	10.4843	4.12702	26.0063	9.6692	9.89725
231	VAC 044B					Day3			4.47	58.2191	21.6874	10.2636	19.241	24.1789	28.4105	16.347	NA	326.302	226.189	140.821	80.4856	230.62	46.4638	37.2314	4.76929	0.492871	30.0567	21.71	22.3788	276.246	110.653	230.62	41.8476	2.63108	4.29848	1.60124	0.75779	1.42062	1.7852	2.09763	1.20695	NA	24.0918	16.7002	10.3972	5.94248	17.0273	3.43055	2.7489
232	VAC 044C					Day7			4.725	34.825	0	18.4401	36.9331	29.9418	94.6943	14.6713	NA	496.577	348.824	251.93	121.444	251.026	88.0644	43.588	0.15142	8.53689	17.755	33.4374	54.6828	422.701	186.687	251.026	65.8262	4.34415	2.43246	0	1.28801	2.57971	2.09138	6.61423	1.02477	NA	34.685	24.3648	17.5968	8.48262	17.5337	6.15114	3.04455
233	VAC 044D					Day11			3.405	34.9894	2.40391	3.5624	14.7285	4.76783	33.3605	13.1997	NA	424.717	115.562	86.6765	82.4217	237.353	68.4004	74.3262	0.224856	2.85692	13.6519	9.74817	23.2801	270.14	84.5491	237.353	71.3633	1.54089	3.39138	0.233001	0.345289	1.42758	0.462127	3.2335	1.27939	NA	41.1661	11.201	8.40121	7.9888	23.0057	6.62977	7.20414
234	VAC 044E					Day28			1.95	27.3528	0.308023	7.34888	15.3658	12.2848	30.161	10.3895	NA	228.089	92.8257	66.9469	51.1246	131.892	37.9117	38.4996	4.6044	3.75599	11.6699	13.8253	20.2753	160.458	59.0357	131.892	38.2057	4.18019	4.62941	0.0521322	1.24378	2.60063	2.07917	5.10468	1.7584	NA	38.6036	15.7105	11.3306	8.65272	22.3225	6.41647	6.51597
235	VAC 045A	52	f	2019	non responder	Base line			6.54	56.6517	4.76911	27.3455	95.6498	67.1136	101.005	61.7266	66.4761	607.172	679.149	237.405	93.7316	677.712	290.594	235.011	8.17141	6.7533	29.5888	81.3817	76.4026	643.161	165.568	677.712	262.802	7.46236	2.85886	0.240667	1.37996	4.82685	3.3868	5.0971	3.11496	3.35463	30.6402	34.2724	11.9804	4.73005	34.1999	14.6645	11.8595
236	VAC 045B					Day3			7.305	58.3885	0.418494	20.8807	15.8832	21.3576	190.036	60.7199	70.0232	516.906	830.586	321.297	98.9533	718.989	70.9259	59.3951	6.44335	10.375	26.5626	18.6204	106.926	673.746	210.125	718.989	65.1605	8.40918	2.63794	0.0189072	0.943372	0.717588	0.964916	8.58565	2.74327	3.16358	23.3533	37.5251	14.5159	4.47062	32.4833	3.20436	2.68341
237	VAC 045C					Day7			2.1	12.3321	5.74213	1.90128	12.0518	6.77551	35.0163	20.4882	34.4793	135.034	232.793	98.977	43.0127	154.155	25.1238	26.2186	0	1.93103	6.65851	9.41364	29.9946	183.913	70.9948	154.155	25.6712	0.965516	1.9381	0.902425	0.298802	1.89404	1.06483	5.50311	3.2199	5.41872	21.2217	36.5854	15.5551	6.75981	24.2268	3.94842	4.12048
238	VAC 045D					Day11			3.765	16.2134	9.69303	4.50519	12.623	10.5055	65.3035	14.4891	NA	177.85	266.288	109.209	46.1724	251.228	17.893	31.1565	17.6662	0.0477081	10.1372	11.5643	39.8963	222.069	77.6906	251.228	24.5248	8.85694	1.42124	0.849673	0.394917	1.10651	0.920893	5.72438	1.27009	NA	15.59	23.3423	9.57304	4.04739	22.0222	1.56847	2.73113
239	VAC 045E					Day28			4.95	109.363	43.8567	70.2459	110.246	69.867	151.458	114.675	71.4909	600.725	406.229	197.076	124.129	507.586	128.632	127.689	71.4688	63.9664	74.4887	90.0564	112.541	503.477	160.602	507.586	128.161	67.7176	7.29162	2.92407	4.68353	7.35046	4.65827	10.0982	7.64573	4.76654	40.0523	27.0846	13.1397	8.27607	33.8424	8.57631	8.51347
240	VAC 046A	37	m	2019	responder	Base line			8.055	73.255	16.3647	21.3219	29.4481	10.6704	102.083	106.136	156.763	937.936	885.405	221.488	43.0195	821.689	81.101	133.118	5.79549	7.02051	36.9805	20.0592	121.661	911.67	132.254	821.689	107.109	6.408	3.00144	0.6705	0.873611	1.20656	0.437191	4.18259	4.34866	6.42298	38.4295	36.2772	9.07488	1.76262	33.6666	3.3229	5.45416
241	VAC 046B					Day3			5.88	69.3533	31.8265	43.6409	16.7288	6.44827	32.6814	32.2145	70.2124	593.138	536.751	164.583	41.0445	453.642	54.2797	41.0507	3.04407	5.24427	48.2736	11.5885	45.0361	564.944	102.814	453.642	47.6652	4.14417	3.89267	1.78636	2.44948	0.938953	0.361929	1.83434	1.80814	3.94089	33.2917	30.1268	9.23771	2.30375	25.462	3.04662	2.3041
242	VAC 046C					Day7			1.68	22.2573	10.0395	6.71345	13.7326	3.77598	41.5441	12.7525	NA	229.568	201.343	45.4966	16.618	138.665	15.1374	6.95967	2.26856	3.77377	13.0034	8.75429	27.1483	215.456	31.0573	138.665	11.0485	3.02117	4.37241	1.97224	1.31884	2.69774	0.741784	8.16126	2.5052	NA	45.0983	39.5535	8.93773	3.26458	27.2405	2.97372	1.36721
243	VAC 046D					Day11			4.56	24.5821	5.82876	9.93652	7.19625	5.18295	89.1276	59.9797	NA	472.937	541.891	134.447	42.629	420.388	12.5667	49.2545	0	1.98599	13.4491	6.1896	74.5537	507.414	88.5382	420.388	30.9106	0.992994	1.77914	0.42186	0.719162	0.520833	0.375119	6.45067	4.34107	NA	34.2292	39.2197	9.73072	3.0853	30.4259	0.909526	3.56483
244	VAC 046E					Day28			4.47	72.453	42.4112	36.2028	50.1703	15.5219	97.7686	93.2558	NA	673.388	452.004	144.307	73.8228	448.429	46.8725	43.9936	36.0777	52.6828	50.3557	32.8461	95.5122	562.696	109.065	448.429	45.4331	44.3803	5.34941	3.13134	2.67296	3.70422	1.14602	7.21854	6.88535	NA	49.7182	33.3727	10.6546	5.45055	33.1088	3.46073	3.24818
245	VAC 047A	55.5	f	2019	responder	Base line			1.86	12.9544	2.96648	7.0591	32.33	14.4638	15.5981	29.2693	44.3265	206.177	161.287	77.4703	20.8226	186.116	65.1475	83.3945	1.96481	2.51114	7.65998	23.3969	29.7313	183.732	49.1464	186.116	74.271	2.23798	2.29859	0.526364	1.25255	5.73654	2.56641	2.76768	5.19345	7.86517	36.5835	28.6184	13.7461	3.6947	33.0239	11.5596	14.7973
246	VAC 047B					Day3			10.32	88.5288	33.3734	58.9812	259.279	184.975	32.4802	46.1858	NA	1072.12	1319.41	102.534	63.7398	1489.72	252.282	208.693	10.832	5.61512	60.2945	222.127	39.333	1195.77	83.1371	1489.72	230.487	8.22354	2.83115	1.06728	1.88621	8.29174	5.91548	1.03872	1.47702	NA	34.2864	42.1947	3.27904	2.0384	47.641	8.06795	6.67398
247	VAC 047C					Day7			3.135	21.9361	3.16677	3.60886	9.6763	6.201	45.0526	32.663	68.812	413.962	186.363	126.048	28.9476	212.802	28.9377	31.8783	1.37931	0	9.57058	7.93865	48.8425	300.163	77.498	212.802	30.408	0.689656	2.30929	0.333378	0.379918	1.01866	0.652802	4.74285	3.43856	7.24409	43.5793	19.6192	13.2696	3.04742	22.4024	3.04638	3.35595
248	VAC 047D					Day11			5.265	32.3837	6.45052	7.45608	12.9488	5.75011	71.9474	52.5159	NA	514.847	401.389	186.658	62.2951	325.569	25.2682	45.7574	2.51246	0	15.4301	9.34946	62.2317	458.118	124.476	325.569	35.5128	1.25623	2.02995	0.404347	0.467379	0.811688	0.360442	4.50997	3.29193	NA	32.2728	25.1608	11.7005	3.90492	20.408	1.58392	2.86827
249	VAC 047E					Day28			4.125	23.712	16.5526	6.98181	23.3456	13.4064	104.111	43.4072	NA	579.094	408.732	161.743	58.017	350.242	44.5115	21.4883	1.56982	1.85933	15.7488	18.376	73.759	493.913	109.88	350.242	32.9999	1.71457	1.89715	1.32434	0.558601	1.86783	1.07262	8.32969	3.47293	NA	46.3322	32.7018	12.9407	4.64183	28.0222	3.56128	1.71924
250	VAC 048A	59	f	2019	responder	Base line			10.155	15.7682	33.6306	26.2876	76.0068	13.6869	123.633	87.7051	30.0485	806.591	632.512	405.586	220.195	634.277	171.1	205.706	4.34061	13.1184	25.2288	44.8469	80.4622	719.551	312.891	634.277	188.403	8.72949	0.512459	1.09298	0.854335	2.47019	0.444818	4.01802	2.85038	0.976562	26.2138	20.5564	13.1814	7.15624	20.6137	5.56066	6.68536
251	VAC 048B					Day3			6.315	16.5155	18.4036	5.12075	18.8137	12.0221	70.5003	24.3482	74.5133	410.413	359.778	269.782	45.1172	361.244	32.3491	48.4188	7.27719	0.842338	13.3466	15.4179	56.4539	385.096	157.45	361.244	40.3839	4.05976	0.863127	0.961805	0.26762	0.983237	0.628296	3.68447	1.27248	3.8942	21.4489	18.8026	14.0993	2.3579	18.8793	1.69062	2.53045
252	VAC 048C					Day7			2.04	13.6922	0	2.59892	7.21348	4.4813	12.4561	13.7337	NA	205.951	149.361	81.417	22.4693	147.946	14.5289	10.8404	5.66334	2.81993	5.43037	5.84739	13.0949	177.656	51.9432	147.946	12.6846	4.24164	2.21514	0	0.420456	1.167	0.724988	2.01516	2.22185	NA	33.3189	24.1638	13.1717	3.6351	23.9349	2.3505	1.75376
253	VAC 048D					Day11			2.895	15.3649	0	1.51938	3.04578	5.80346	21.9862	7.22647	7.97441	221.3	214.964	106.402	26.8262	179.408	11.8034	5.25415	0.132465	0	5.62809	4.42462	12.3957	218.132	66.6139	179.408	8.52876	0.0662326	1.75161	0	0.173211	0.347222	0.661601	2.50646	0.823825	0.909091	25.2284	24.5061	12.1299	3.05822	20.4527	1.3456	0.598979
254	VAC 048E					Day28			6.015	32.1508	6.64556	14.1952	55.8171	15.5773	73.5332	53.3515	113.571	637.681	392.344	190.94	72.8393	407.384	56.3633	88.3116	9.97086	6.79074	17.6639	35.6972	80.1519	515.012	131.89	407.384	72.3374	8.3808	1.76406	0.364631	0.778868	3.06259	0.854701	4.03465	2.92731	6.23145	34.9885	21.5273	10.4766	3.99657	22.3525	3.09256	4.84551
255	VAC 049A	32	m	2019	responder	Base line			1.755	12.2923	3.94818	7.63746	8.29578	5.06655	47.5782	15.8696	14.7713	157.577	158.43	32.0139	15.9626	123.724	16.5073	23.4712	0	2.07476	7.95931	6.68117	26.073	158.004	23.9883	123.724	19.9893	1.03738	2.3116	0.742467	1.43625	1.56005	0.95278	8.94722	2.98433	2.77778	29.6329	29.7932	6.02031	3.00182	23.2667	3.10425	4.41383
256	VAC 049B					Day3			7.605	34.508	15.2926	17.1222	41.8605	37.8354	166.438	83.2925	103.633	1125.52	741.595	NA	70.4957	761.055	71.2164	124.499	9.16191	0	22.3076	39.8479	117.788	933.559	70.4957	761.055	97.8579	4.58096	1.49754	0.66365	0.743049	1.81661	1.64194	7.2229	3.61463	4.49735	48.8441	32.1829	NA	3.05929	33.0274	3.09057	5.40288
257	VAC 049C					Day7			8.37	86.1325	17.5221	28.3627	100.626	54.6504	165.757	126.229	101.444	879.802	847.146	143.859	51.7901	697.797	101.27	198.693	0.175838	8.11638	44.0058	77.638	131.143	863.474	97.8244	697.797	149.981	4.14611	3.39624	0.690905	1.11835	3.96771	2.15489	6.53586	4.97726	4	34.691	33.4034	5.67242	2.04211	27.5145	3.99312	7.83456
258	VAC 049D					Day11			6.87	75.7625	44.3106	27.7077	71.36	58.889	221.191	104.773	NA	998.93	649.064	111.633	112.761	669.667	117.255	154.314	59.1694	57.5641	49.2603	65.1245	162.982	823.997	112.197	669.667	135.784	58.3668	3.63961	2.12867	1.33107	3.42811	2.82901	10.626	5.03326	NA	47.9884	31.1809	5.36283	5.41699	32.1706	5.6329	7.41318
259	VAC 049E					Day28			4.485	34.371	6.0067	14.0685	30.6765	12.0158	185.479	63.002	146.554	419.97	294.955	105.476	51.7984	248.781	32.4911	62.6848	15.0178	12.4207	18.1487	21.3462	131.678	357.462	78.637	248.781	47.5879	13.7192	2.52922	0.442008	1.03524	2.25736	0.884197	13.6487	4.63606	10.7843	30.9039	21.7046	7.76153	3.81163	18.3068	2.39089	4.61272
260	VAC 050A	53	f	2019	responder	Base line			5.01	34.516	2.6135	13.4601	12.2161	3.85067	11.4785	10.6697	NA	463.264	329.775	79.8854	115.395	317.455	63.337	64.3591	0.0540436	5.04329	16.8632	8.03337	11.0741	396.519	97.6404	317.455	63.848	2.54867	2.27374	0.172164	0.886682	0.804732	0.253662	0.756144	0.702864	NA	30.5174	21.7239	5.26244	7.60165	20.9123	4.17231	4.23965
261	VAC 050B					Day3			5.955	56.5558	10.7868	16.5776	25.3619	20.3901	43.3329	32.7257	90.3086	374.852	270.548	133.476	104.856	338.948	35.2771	64.6209	6.88361	12.0574	27.9734	22.876	55.4557	322.7	119.166	338.948	49.949	9.47052	3.13439	0.597815	0.918752	1.40559	1.13004	2.40156	1.8137	5.00501	20.7747	14.9941	7.39738	5.81125	18.7849	1.9551	3.58137
262	VAC 050C					Day7			2.355	42.599	5.64005	9.37393	13.0323	1.58249	19.1396	15.0173	NA	268.932	149.195	49.7962	34.1249	173.881	28.2781	41.1817	3.87078	1.47189	19.2043	7.30738	17.0784	209.063	41.9605	173.881	34.7299	2.67134	5.96989	0.790404	1.31368	1.82636	0.221773	2.68225	2.10454	NA	37.6884	20.9084	6.9785	4.78231	24.3679	3.96294	5.77126
263	VAC 050D					Day11			4.23	24.3449	20.5905	13.0634	21.2437	26.2696	66.2751	69.8346	NA	666.86	323.034	73.7034	62.6566	348.317	31.0822	33.7949	12.7409	5.37153	19.3329	23.7567	68.0549	494.947	68.18	348.317	32.4385	9.05619	1.89944	1.60651	1.01923	1.65748	2.04961	5.17092	5.44864	NA	52.0298	25.2037	5.75049	4.88859	27.1764	2.42509	2.63675
264	VAC 050E					Day28			3.885	36.7635	5.09775	5.80649	14.7678	0.0833089	33.817	29.4052	NA	478.601	259.658	86.4698	68.0785	251.595	42.0866	39.2773	8.13033	0	15.8892	7.42555	31.6111	369.129	77.2742	251.595	40.6819	4.06516	3.12308	0.433057	0.493265	1.25453	0.00707714	2.87278	2.49799	NA	40.6574	22.0581	7.34566	5.78331	21.3731	3.57528	3.33663
265	VAC 051A	37	m	2019	responder	Base line			8.7	48.5145	3.23299	16.4785	78.4712	35.039	121.662	94.6189	39.7837	785.932	588.487	112.498	87.3303	717.33	168.809	173.337	1.8135	10.499	22.742	56.7551	85.355	687.21	99.9139	717.33	171.073	6.15623	1.84039	0.122643	0.62511	2.97679	1.3292	4.61524	3.58935	1.50919	29.8142	22.3242	4.26758	3.31286	27.2118	6.40376	6.57553
266	VAC 051B					Day3			10.095	69.4507	12.859	17.0591	30.5654	9.36625	280.803	98.7978	94.7971	1101.72	707.853	NA	115.246	670.015	113.356	130.08	0	5.51096	33.1229	19.9658	158.132	904.785	115.246	670.015	121.718	2.75548	2.27053	0.420395	0.557707	0.999266	0.306208	9.1802	3.22997	3.09917	36.0181	23.1417	NA	3.7677	21.9046	3.70591	4.25268
267	VAC 051C					Day7			9.855	66.4257	15.6585	16.0937	29.692	16.242	156.956	95.3492	136.446	723.036	730.509	142.101	95.6342	599.027	72.708	106.523	0.07836	0.150667	32.726	22.967	129.584	726.773	118.867	599.027	89.6157	0.114513	2.22452	0.524386	0.53896	0.994354	0.543926	5.2563	3.19314	4.56942	24.2137	24.4639	4.7588	3.20268	20.0608	2.43491	3.56735
268	VAC 051D					Day11			8.385	103.208	67.8351	48.5123	124.57	56.4305	163.73	161.664	NA	1218.51	640.624	168.113	143.374	776.743	262.886	354.652	50.7428	43.9758	73.185	90.5004	162.697	929.568	155.744	776.743	308.769	47.3593	4.06224	2.66999	1.90944	4.90307	2.2211	6.44439	6.36308	NA	47.9606	25.2149	6.61693	5.64318	30.5725	10.3472	13.9591
269	VAC 051E					Day28			9.15	39.6279	19.258	14.9625	12.7563	12.2995	192.241	102.785	56.9682	855.756	417.097	136.172	119.038	484.745	58.101	63.7932	4.21633	5.20709	24.6161	12.5279	117.331	636.426	127.605	484.745	60.9471	4.71171	1.42935	0.694618	0.539684	0.46011	0.443631	6.93398	3.70738	2.05479	30.8664	15.0443	4.9116	4.29359	17.4844	2.09566	2.30097
270	VAC 053A	36	f	2019	responder	Base line	common cold		4.965	68.5976	5.47819	3.29756	32.6698	5.89273	48.9331	29.2891	NA	520.732	509.134	96.675	64.7007	531.659	43.4283	96.2326	8.75335	13.2065	25.7911	19.2813	39.1111	514.933	80.6878	531.659	69.8304	10.9799	4.55982	0.364146	0.219195	2.17163	0.391701	3.25267	1.9469	NA	34.614	33.8431	6.42617	4.30078	35.3404	2.88676	6.39676
271	VAC 053B					Day3			2.19	25.7185	7.75286	6.94591	8.7158	3.96722	23.0907	12.4835	NA	291.853	171.202	55.2146	25.2919	171.219	24.9147	25.9845	1.48403	1.8501	13.4724	6.34151	17.7871	231.528	40.2532	171.219	25.4496	1.66707	3.87578	1.16836	1.04675	1.31347	0.59786	3.47977	1.88126	NA	43.9822	25.8002	8.32084	3.81149	25.8027	3.75464	3.91586
272	VAC 053C					Day7			1.725	20.8871	10.1701	9.21041	48.5646	29.4474	10.817	17.7141	8.12869	299.354	226.732	41.389	23.5067	219.67	131.133	132.763	4.42699	5.84017	13.4225	39.006	12.2199	263.043	32.4479	219.67	131.948	5.13358	3.99619	1.94577	1.76217	9.29156	5.63399	2.06955	3.38913	1.55521	57.2734	43.3791	7.9187	4.49739	42.028	25.0888	25.4007
273	VAC 053D					Day11			2.82	15.9496	8.63414	6.83395	32.4546	9.87389	44.9716	40.3237	NA	485.453	266.297	109.134	45.4198	315.577	88.5748	41.6302	7.62911	10.456	10.4725	21.1642	42.6477	375.875	77.2767	315.577	65.1025	9.04257	1.86662	1.01048	0.799798	3.79826	1.15557	5.26316	4.71921	NA	56.8141	31.1655	12.7722	5.31561	36.9329	10.3662	4.87211
274	VAC 053E					Day28			1.755	13.4076	4.87325	2.68303	5.01872	7.02222	13.5894	19.044	NA	206.433	136.012	73.5273	30.2758	172.726	50.8353	34.4622	0	8.99259	6.98795	6.02047	16.3167	171.222	51.9016	172.726	42.6487	4.4963	2.52134	0.916428	0.504552	0.943786	1.32055	2.55553	3.58128	NA	38.8203	25.5775	13.827	5.69346	32.4817	9.55973	6.48071
275	VAC 054A	41	m	2019	responder	Base line			11.79	34.697	1.31935	8.21724	28.5294	13.7497	173.941	142.528	NA	1391.89	1230.87	215.618	67.9744	1219.2	100.899	89.9752	0	4.50072	14.7445	21.1396	158.235	1311.38	141.796	1219.2	95.4369	2.25036	0.971259	0.0369322	0.230022	0.798612	0.384891	4.86907	3.98975	NA	38.9626	34.4552	6.0357	1.90278	34.1286	2.82441	2.51864
276	VAC 054B					Day3			6.465	38.1722	8.58783	6.85161	22.0959	2.89985	74.5845	61.9024	33.4748	876.271	527.176	NA	66.5248	574.034	37.0193	58.8645	0.0713519	0	17.8706	12.4979	56.6539	701.723	66.5248	574.034	47.9419	0.0356759	1.94866	0.438402	0.349769	1.12798	0.148035	3.80748	3.16007	1.70886	44.7329	26.9119	NA	3.39604	29.304	1.88981	3.00498
277	VAC 054C					Day7	weakness		7.05	48.3114	8.14129	6.25039	24.0359	35.492	217.392	81.9059	114.377	783.706	657.034	286.183	128.809	566.104	74.6652	94.0359	12.5627	3.30147	20.901	29.764	137.892	720.37	207.496	566.104	84.3505	7.93208	2.26161	0.38112	0.292601	1.1252	1.6615	10.1768	3.83428	5.35433	36.6878	30.7579	13.3971	6.02997	26.5011	3.49532	4.40212
278	VAC 054D					Day11			13020	24676.8	18874.5	11782.6	24982.1	14722.5	195273	220113	NA	1.84361e+06	1.2395e+06	274079	70439.3	1.34092e+06	44144.8	98989.6	4016.98	16427.2	18444.6	19852.3	207693	1.54156e+06	172259	1.34092e+06	71567.2	10222.1	0.625512	0.478433	0.298666	0.63325	0.373188	4.94982	5.57946	NA	46.7322	31.4191	6.9474	1.78551	33.9898	1.11899	2.5092
279	VAC 054E					Day28			5.745	16.9623	6.53931	8.97717	7.46192	13.2775	49.0768	59.641	50.9337	665.227	497.832	86.0322	38.4876	399.012	32.7749	32.5961	0.0406524	0	10.8263	10.3697	53.2172	581.53	62.2599	399.012	32.6855	0.0203262	0.974432	0.375664	0.515712	0.428665	0.762751	2.81931	3.42619	2.92599	38.2153	28.5989	4.94229	2.211	22.922	1.88282	1.87255
280	VAC 055A	48	f	2019	responder	Base line			4.86	30.4409	14.9948	10.8703	52.266	21.1698	39.558	40.8332	2.73206	553.895	473.764	208.64	84.0982	448.315	94.5201	114.141	9.89139	23.6898	18.7686	36.7179	27.7077	513.83	146.369	448.315	104.33	16.7906	2.06718	1.01827	0.738178	3.54928	1.4376	2.6863	2.7729	0.185529	37.6139	32.1724	14.1683	5.71095	30.4442	6.41867	7.75106
281	VAC 055B					Day3			2.505	10.6018	4.19442	2.35487	9.76306	3.06889	18.4285	31.9355	NA	341.861	322.437	134.749	38.8652	228.378	30.5877	51.1957	3.29301	2.43512	5.71703	6.41597	25.182	332.149	86.8069	228.378	40.8917	2.86406	1.39678	0.552613	0.310253	1.28628	0.404325	2.42795	4.20749	NA	45.04	42.481	17.7531	5.12048	30.0887	4.02992	6.74502
282	VAC 055C					Day7			3.51	23.2591	9.99424	4.59647	11.8981	14.1784	22.27	48.2773	NA	529.582	363.379	139.723	45.4333	357.755	16.7727	17.544	0.125643	3.02203	12.6166	13.0383	35.2737	446.48	92.5783	357.755	17.1584	1.57384	2.18698	0.939723	0.43219	1.11874	1.33315	2.09397	4.53935	NA	49.7948	34.1672	13.1377	4.27193	33.6385	1.57708	1.6496
283	VAC 055D					Day11			3.765	28.0523	5.70397	12.6201	19.5308	6.2773	39.9407	19.0337	NA	599.893	432.825	179.6	58.1186	333.572	51.0332	73.9846	2.59567	2.85725	15.4588	12.904	29.4872	516.359	118.859	333.572	62.5089	2.72646	2.45902	0.5	1.10626	1.71203	0.550257	3.50113	1.66846	NA	52.5856	37.9407	15.7434	5.09457	29.2403	4.47348	6.48536
284	VAC 055E					Day28			4.245	36.41	0	1.87659	26.1388	20.1599	55.8551	40.794	NA	541.083	450.43	187.377	65.2235	410.909	63.5508	71.8056	3.2854	0	12.7622	23.1493	48.3245	495.757	126.3	410.909	67.6782	1.6427	2.83074	0	0.145898	2.03219	1.56736	4.34253	3.17158	NA	42.0672	35.0193	14.5679	5.07088	31.9466	4.94084	5.58262
285	VAC 056A	44	f	2019	responder	Base line			5.955	31.5676	16.2387	6.11551	25.2679	13.7107	145.946	90.3471	58.4315	596.771	688.572	213.807	65.2446	518.605	68.4989	65.4193	11.8402	3.52241	17.9739	19.4893	98.2416	642.671	139.526	518.605	66.9591	7.68129	1.74952	0.899965	0.338929	1.40038	0.75986	8.08851	5.00714	3.23834	33.0737	38.1614	11.8495	3.61593	28.7417	3.79629	3.62561
286	VAC 056B					Day3			3.18	17.9749	6.46178	2.63433	14.7118	5.99875	66.2175	43.0727	32.5752	448.347	290.769	141.965	43.4301	271.821	43.1138	19.6971	2.47422	0.0390603	9.02368	10.3553	47.2885	369.558	92.6975	271.821	31.4055	1.25664	1.86551	0.670629	0.273401	1.52685	0.622574	6.87232	4.47026	3.38078	46.5313	30.1772	14.7337	4.50735	28.2107	4.47452	2.04425
287	VAC 056C					Day7			3.66	20.5843	15.1225	4.20263	11.7059	6.06986	74.265	26.4699	NA	421.334	322.992	118.577	49.7579	284.073	31.1914	29.8322	4.84156	0	13.3031	8.88788	50.3675	372.163	84.1676	284.073	30.5118	2.42078	1.85615	1.36364	0.378964	1.05556	0.547337	6.6967	2.38687	NA	37.993	29.1251	10.6925	4.48682	25.6157	2.81262	2.69006
288	VAC 056D					Day11			2.745	24.5982	0	3.98504	17.6752	12.901	63.7204	40.1208	NA	428.598	227.56	75.7092	31.5614	232.699	54.4633	69.7233	4.43105	2.24793	9.52773	15.2881	51.9206	328.079	53.6353	232.699	62.0933	3.33949	2.95745	0	0.479124	2.1251	1.55109	7.66114	4.82375	NA	51.5306	27.3596	9.10256	3.79464	27.9775	6.54815	8.38288
289	VAC 056E					Day28			3.72	26.8024	4.16268	4.43342	33.6805	2.39267	98.0229	37.921	NA	539.63	338.808	123.253	34.6175	321.403	45.8333	41.6982	0.332913	2.00899	11.7995	18.0366	67.972	439.219	78.9353	321.403	43.7657	1.17095	2.37787	0.369307	0.393327	2.98808	0.212274	8.69645	3.3643	NA	47.8752	30.0586	10.9348	3.07121	28.5144	4.06627	3.6994
290	VAC 057A	41	f	2019	responder	Base line			6.12	50.9352	7.3115	17.7663	81.7536	34.1643	52.4748	63.0061	381.853	728.527	594.028	173.225	57.0585	688.371	176.535	213.565	7.80579	12.8205	25.3377	57.9589	165.778	661.278	115.141	688.371	195.05	10.3132	2.74678	0.394287	0.958083	4.40872	1.84238	2.82981	3.39773	20.5922	39.2873	32.0341	9.34147	3.07699	37.1218	9.52002	11.5169
291	VAC 057B					Day3			4.56	23.4701	0.665122	15.6487	21.4599	3.6295	106.184	47.633	NA	653.823	478.312	151.769	82.1245	424.819	22.4577	29.4726	2.47083	2.83336	13.2613	12.5447	76.9087	566.068	116.947	424.819	25.9651	2.65209	1.69867	0.0481386	1.13258	1.55318	0.262688	7.68516	3.44747	NA	47.3209	34.6182	10.9844	5.94381	30.7466	1.62539	2.1331
292	VAC 057C					Day7	herpes		5.67	62.893	31.5895	14.1755	43.5836	16.4006	126.996	97.1564	NA	821.835	613.888	108.046	67.2708	673.352	76.0528	107.148	11.0254	7.03991	36.2193	29.9921	112.076	717.861	87.6584	673.352	91.6002	9.03266	3.66081	1.83873	0.825113	2.53686	0.954628	7.39207	5.65517	NA	47.8364	35.7325	6.28902	3.91562	39.1937	4.42679	6.23673
293	VAC 057D					Day11	common cold+herpes		6.015	29.2089	25.2463	13.2959	28.7362	6.26304	83.9042	40.9107	NA	1152.57	682.61	128.731	64.5517	837.455	70.0015	70.0797	0	2.26309	22.5837	17.4996	62.4074	917.588	96.6416	837.455	70.0406	1.13155	1.60264	1.38522	0.729523	1.57671	0.343643	4.60368	2.2447	NA	63.2394	37.4536	7.06328	3.54185	45.9498	3.84086	3.84515
294	VAC 057E					Day28			4.65	84.4495	40.007	23.0442	20.0031	18.7475	58.498	43.0415	36.0558	706.282	492.447	156.899	36.1019	445.312	115.106	113.123	9.30213	8.60115	49.1669	19.3753	45.8651	599.365	96.5003	445.312	114.114	8.95164	5.99379	2.83949	1.63556	1.41972	1.3306	4.15188	3.05486	2.55906	50.1283	34.9514	11.1359	2.56233	31.6059	8.16962	8.02887
295	VAC 058A	40	f	2019	responder	Base line			4.485	40.208	10.8787	0.0367173	6.19539	15.3075	16.4254	36.2407	114.39	304.641	313.291	155.878	71.1502	315.991	39.8871	49.0258	0.038512	11.5183	17.0412	10.7515	55.6854	308.966	113.514	315.991	44.4564	5.77838	2.95875	0.800523	0.00270188	0.455894	1.12642	1.20868	2.66681	8.41751	22.4173	23.0538	11.4705	5.23566	23.2525	2.93513	3.60761
296	VAC 058B					Day3			5.64	38.7782	15.6793	17.3774	69.2981	30.9672	110.232	43.4673	49.2768	690.365	487.262	NA	168.078	469.361	114.907	115.418	2.69863	6.58561	23.945	50.1326	67.6586	588.813	168.078	469.361	115.162	4.64212	2.26916	0.9175	1.01687	4.05508	1.81209	6.45038	2.54355	2.88351	40.3977	28.5128	NA	9.83536	27.4654	6.72394	6.75383
297	VAC 058C					Day7			3.675	37.5242	5.23695	17.2316	22.2637	27.2066	61.9125	38.7849	NA	487.742	365.439	119.891	43.1451	285.216	53.8687	62.0578	2.45848	0	19.9976	24.7352	50.3487	426.591	81.5181	285.216	57.9633	1.22924	3.36986	0.470304	1.54748	1.99939	2.44329	5.56005	3.48307	NA	43.8017	32.8182	10.7668	3.87464	25.6138	4.83768	5.5731
298	VAC 058D					Day11			3.51	23.2963	31.8613	14.6807	14.112	28.5359	54.0917	33.9067	NA	551.427	292.452	105.247	75.5708	295.993	98.9696	112.941	8.50824	10.7615	23.2794	21.324	43.9992	421.939	90.4089	295.993	105.955	9.63485	2.19047	2.99581	1.38038	1.3269	2.68313	5.08606	3.18813	NA	51.8487	27.4982	9.89601	7.10565	27.8312	9.30576	10.6195
299	VAC 058E					Day28			5.325	31.5127	0	6.97308	19.6361	17.2716	77.6068	61.7592	NA	937.768	545.429	148.798	70.2792	541.091	37.2726	37.7756	0.124506	0	12.8286	18.4539	69.683	741.598	109.539	541.091	37.5241	0.0622531	1.9531	0	0.432178	1.21701	1.07046	4.80992	3.82771	NA	58.121	33.8046	9.22222	4.35577	33.5358	2.31008	2.34126
300	VAC 059A	63.7	f	2019	responder	Base line			3.735	13.0025	23.4778	10.3167	26.5911	13.7247	35.2872	7.65048	0	306.265	417.751	132.025	67.5978	268.591	79.8909	54.7493	0	0.193608	15.599	20.1579	14.3126	362.008	99.8116	268.591	67.3201	0.0968041	1.14893	2.07455	0.911604	2.34965	1.21274	3.11805	0.676014	0	27.0623	36.9134	11.6661	5.9731	23.7333	7.05934	4.83777
301	VAC 059B					Day3			1.8	9.1243	3.20706	2.26519	6.79229	8.93859	15.5163	18.3756	NA	207.452	153.387	72.5246	21.2078	124.371	23.3655	29.9402	0	2.23869	4.86551	7.86544	16.9459	180.42	46.8662	124.371	26.6528	1.11934	1.67296	0.588019	0.415326	1.24538	1.63891	2.84494	3.3692	NA	38.0367	28.1238	13.2975	3.88848	22.8037	4.2841	5.48958
302	VAC 059C					Day7			4.095	16.5961	5.15686	13.7981	10.5878	1.91733	75.9873	20.4046	NA	525.985	283.162	190.679	26.5332	347.946	40.1563	39.1087	2.36094	0	11.8504	6.25256	48.1959	404.573	108.606	347.946	39.6325	1.18047	1.33755	0.415613	1.11205	0.853314	0.154525	6.12413	1.64449	NA	42.3913	22.8212	15.3676	2.13842	28.0424	3.23636	3.15193
303	VAC 059D					Day11			4.365	37.8376	31.4387	11.8397	54.4634	36.4426	47.1561	54.2784	57.6005	421.681	367.94	223.632	118.377	302.244	155.966	217.205	9.62254	2.87986	27.0387	45.453	53.0117	394.81	171.005	302.244	186.586	6.2512	2.86086	2.37705	0.895189	4.11792	2.75539	3.56542	4.10393	4.35511	31.8828	27.8195	16.9086	8.95037	22.8523	11.7925	16.4227
304	VAC 059E					Day28			2.01	16.7021	0.291123	1.24145	7.33063	0	68.7486	19.9971	NA	253.153	283.928	134.693	27.0546	133.579	23.7807	55.854	0.0424796	0	6.07823	3.66531	44.3728	268.54	80.8738	133.579	39.8173	0.0212398	2.74241	0.0478011	0.20384	1.20366	0	11.2882	3.28344	NA	41.5665	46.6197	22.116	4.44225	21.933	3.90469	9.17097
305	VAC 060A	42	f	2019	responder	Base line			5.175	34.2792	2.69016	0.858952	2.69799	6.53145	21.0323	65.2203	1.02923	856.447	969.848	118.877	71.2739	823.592	38.0097	32.0771	1.24727	0	12.6094	4.61472	29.0939	913.148	95.0753	823.592	35.0434	0.623633	2.18614	0.171563	0.0547792	0.172063	0.41654	1.34133	4.15939	0.0656383	54.6195	61.8516	7.5813	4.54545	52.5242	2.42405	2.0457
306	VAC 060B					Day3			3.585	38.0486	7.11374	9.70589	38.4086	9.92247	43.0115	25.1994	3.44843	623.329	364.119	NA	78.5758	404.876	81.2746	39.8795	5.57977	5.09146	18.2894	24.1655	23.8864	493.724	78.5758	404.876	60.577	5.33561	3.50274	0.654887	0.893519	3.53587	0.913457	3.95961	2.31984	0.31746	57.3833	33.5206	NA	7.23365	37.2726	7.4821	3.67128
307	VAC 060C					Day7			5.13	58.8131	22.2176	18.4738	17.3536	24.1243	37.7055	48.0411	NA	617.777	559.439	263.757	61.1875	527.804	14.0995	49.6793	8.69947	2.7369	33.1682	20.739	42.8733	588.608	162.472	527.804	31.8894	5.71818	3.78368	1.42935	1.18849	1.11643	1.55201	2.42574	3.09067	NA	39.744	35.9909	16.9685	3.93643	33.9557	0.907075	3.19607
308	VAC 060D					Day11			4.56	37.2406	19.0827	17.7395	48.4328	26.9886	27.3587	52.0643	99.9098	630.967	501.325	230.169	71.8608	468.024	90.0682	97.0362	8.26822	3.76114	24.6876	37.7107	59.7776	566.146	151.015	468.024	93.5522	6.01468	2.69532	1.38112	1.28391	3.50535	1.95332	1.9801	3.76819	7.23104	45.6667	36.2837	16.6586	5.20098	33.8736	6.51875	7.02306
309	VAC 060E					Day28			4.38	48.7861	14.9465	9.45606	14.6309	0.0251801	62.306	25.5895	30.9537	543.587	312.627	265.845	101.809	331.562	49.9032	41.7495	4.94876	3.8715	24.3962	7.32803	39.6164	428.107	183.827	331.562	45.8263	4.41013	3.67603	1.12622	0.712514	1.10244	0.00189732	4.69476	1.92817	2.33236	40.9593	23.5565	20.0314	7.6713	24.9832	3.76021	3.14582
310	VAC 061A	61	f	2019	responder	Base line			8.22	83.5158	20.3839	7.24934	2.48974	0	113.797	36.8328	68.1966	960.808	472.027	191.802	86.6978	538.784	53.2172	87.3557	0	7.11556	37.0497	1.24487	72.9421	716.417	139.25	538.784	70.2864	3.55778	3.35316	0.818414	0.291061	0.099963	0	4.56895	1.47884	2.7381	38.5764	18.9519	7.70086	3.48092	21.6322	2.13667	3.50733
311	VAC 061B					Day3			4.41	46.491	6.18588	6.25219	10.8115	1.18951	78.4859	24.663	29.9156	500.705	246.431	153.207	57.7106	297.264	30.3271	25.5557	0	0	19.643	6.00052	44.3548	373.568	105.459	297.264	27.9414	0	3.47927	0.462935	0.467898	0.809108	0.0890195	5.87368	1.84571	2.23881	37.4715	18.4423	11.4656	4.31891	22.2465	2.2696	1.91252
312	VAC 061C					Day7			6.45	89.6552	50.4554	17.6244	32.5783	10.9843	101.495	41.4959	NA	691.607	523.825	211.035	163.306	497.346	78.1662	77.7659	4.98407	2.90723	52.5783	21.7813	71.4955	607.716	187.17	497.346	77.966	3.94565	4.58747	2.5817	0.901804	1.66697	0.562046	5.19329	2.12326	NA	35.3881	26.803	10.7982	8.35602	25.4481	3.9996	3.97912
313	VAC 061D					Day11			13.995	99.1339	53.0297	19.2486	17.3758	0	143.949	51.893	145.17	1527.84	1380.62	194.266	244.683	1034.13	77.4693	38.6279	9.53156	19.1744	57.1374	8.68792	113.671	1454.23	219.475	1034.13	58.0486	14.353	2.3378	1.25056	0.453925	0.409761	0	3.39463	1.22375	3.42342	36.0298	32.5581	4.58122	5.77018	24.387	1.8269	0.910931
314	VAC 061E					Day28			4.935	44.3981	7.92564	1.70538	30.4508	15.7106	53.096	17.0386	NA	629.333	450.12	151.509	127.369	410.986	65.1856	73.1175	3.34076	2.78663	18.0097	23.0807	35.0673	539.727	139.439	410.986	69.1516	3.0637	2.96917	0.530035	0.114049	2.03643	1.05066	3.55085	1.13947	NA	42.0873	30.1022	10.1323	8.51793	27.4851	4.35935	4.88981
315	VAC 062A	56	f	2019	responder	Base line			6.525	40.9393	4.05388	12.1712	23.5193	9.27907	89.6597	45.4939	30.8069	818.288	565.702	176.503	55.3258	595.512	51.2445	67.6268	2.74015	7.8031	19.0548	16.3992	55.3202	691.995	115.914	595.512	59.4356	5.27162	2.0707	0.205044	0.615618	1.1896	0.469333	4.53497	2.30107	1.5582	41.3888	28.6131	8.92749	2.79837	30.1209	2.59194	3.42055
316	VAC 062B					Day3			1.68	13.8559	0.909439	0.435201	1.91368	1.16538	24.5416	14.6	12.2365	165.013	116.417	58.5321	12.7941	101.049	7.16408	19.8719	1.68593	0	5.06685	1.53953	17.126	140.715	35.6631	101.049	13.518	0.842964	2.72197	0.178658	0.0854944	0.37594	0.228938	4.82114	2.86814	2.40385	32.4166	22.8699	11.4985	2.51337	19.851	1.40737	3.90381
317	VAC 062C					Day7			4.425	22.0715	8.51311	6.10908	2.56781	4.42853	39.9421	23.7416	25.4454	288.915	283.628	122.334	42.2307	254.043	34.5141	31.9259	5.06461	2.67035	12.2312	3.49817	29.7097	286.271	82.2824	254.043	33.22	3.86748	1.64617	0.63494	0.455638	0.191517	0.330296	2.97903	1.77074	1.89781	21.5483	21.154	9.12414	3.14972	18.9475	2.57419	2.38115
318	VAC 062D					Day11			3.03	13.9672	8.22315	4.1902	13.8533	6.41389	20.3701	17.318	21.2451	191.48	191.425	84.0527	19.0699	181.628	32.9149	26.5183	3.29724	1.55534	8.79352	10.1336	19.6444	191.453	51.5613	181.628	29.7166	2.42629	1.52133	0.89568	0.456404	1.50893	0.698612	2.21875	1.88631	2.31405	20.8564	20.8504	9.15517	2.07713	19.7833	3.58515	2.88842
319	VAC 062E					Day28			3.405	8.69884	2.32963	3.95516	2.26709	8.62683	13.4128	23.9468	NA	340.705	181.83	96.4983	36.5488	189.498	34.3843	36.6887	5.25809	3.65087	4.99455	5.44696	18.6798	261.267	66.5236	189.498	35.5365	4.45448	0.843144	0.225802	0.383358	0.21974	0.836164	1.30005	2.32107	NA	33.0231	17.624	9.3532	3.54253	18.3673	3.33273	3.55609
320	VAC 063A	73	m	2019	non responder	Base line			14.46	123.663	75.9729	71.712	71.3918	36.7034	186.409	198.886	259.912	1680.76	1111.1	711.682	173.925	1336.4	113.651	177.981	54.8992	45.4528	90.4493	54.0476	215.069	1395.93	442.803	1336.4	145.816	50.176	2.82247	1.73399	1.63674	1.62944	0.837714	4.25458	4.53935	5.9322	38.3614	25.3596	16.2433	3.96964	30.5019	2.59394	4.06221
321	VAC 063B					Day3			2.595	25.9768	6.88934	4.5143	15.475	5.69033	46.3899	19.1843	29.353	337.261	191.784	117.105	46.4148	210.001	30.9193	43.2658	0.0300936	1.45435	12.4602	10.5827	31.6424	264.523	81.7601	210.001	37.0926	0.742223	3.30374	0.876189	0.574131	1.96812	0.723698	5.89988	2.43986	3.73312	42.893	24.3911	14.8935	5.90305	26.708	3.93233	5.50256
322	VAC 063C					Day7			8.28	34.0754	10.5502	2.19875	4.89735	4.43942	54.1494	55.9492	NA	920.19	598.905	338.944	59.8395	683.143	52.5371	26.1111	0	0.367058	15.6081	4.66838	55.0493	759.548	199.392	683.143	39.3241	0.183529	1.35821	0.420521	0.0876402	0.195204	0.176951	2.15835	2.23008	NA	36.6779	23.8718	13.51	2.38514	27.2294	2.09408	1.04076
323	VAC 063D					Day11			7.605	50.193	9.15401	7.56175	24.2014	9.23842	65.8208	62.3151	52.456	753.426	460.08	301.312	73.8181	556.711	51.2601	84.4641	8.71438	13.6972	22.3029	16.7199	60.1973	606.753	187.565	556.711	67.8621	11.2058	2.17822	0.397255	0.328156	1.05026	0.400918	2.85642	2.70428	2.27642	32.6963	19.966	13.076	3.20347	24.1595	2.22453	3.66548
324	VAC 063E					Day28			6.255	26.367	9.18726	6.34302	24.897	9.25778	33.4902	56.3784	NA	791.106	345.672	240.531	97.2574	420.61	47.0076	54.1665	3.34828	4.9605	13.9658	17.0774	44.9343	568.389	168.894	420.61	50.5871	4.15439	1.3912	0.484748	0.334677	1.31364	0.488469	1.76705	2.9747	NA	41.7412	18.2387	12.6912	5.1316	22.1927	2.48026	2.85799
325	VAC 064A	44	f	2019	responder	Base line			4.5	58.5273	4.68021	14.6959	9.54222	9.00799	133.726	42.5643	NA	428.144	232.683	300.387	139.552	284.23	64.4081	46.0403	8.69976	12.7855	25.9678	9.2751	88.145	330.414	219.97	284.23	55.2242	10.7426	4.29243	0.343249	1.07781	0.699833	0.660652	9.80753	3.12169	NA	31.4004	17.0651	22.0306	10.2349	20.8456	4.72374	3.37662
326	VAC 064B					Day3			3.165	69.5266	25.8613	40.931	81.4568	23.0012	129.992	44.8273	18.1628	358.464	242.92	NA	113.16	195.541	73.1124	77.9056	47.6019	72.9877	45.4396	52.229	64.3273	300.692	113.16	195.541	75.509	60.2948	7.24994	2.69671	4.26811	8.49398	2.39847	13.555	4.6744	1.89394	37.3791	25.3307	NA	11.7999	20.3901	7.62385	8.12367
327	VAC 064C					Day7			2.7	111.119	124.307	26.99	12.9007	2.62492	22.817	17.8788	NA	112.193	84.9974	167.938	51.5859	82.6777	24.4029	14.8595	6.29308	0	87.472	7.76279	20.3479	98.5953	109.762	82.6777	19.6312	3.14654	13.5826	15.1946	3.29911	1.5769	0.320856	2.78902	2.18541	NA	13.7139	10.3896	20.5279	6.30558	10.1061	2.98287	1.81635
328	VAC 064D					Day11			3	35.7583	61.3339	3.80152	10.1858	0.111884	45.1928	18.8468	NA	315.521	102.853	180.53	60.7306	135.106	42.8973	40.1583	4.78492	0	33.6312	5.14886	32.0198	209.187	120.63	135.106	41.5278	2.39246	3.9338	6.7474	0.418209	1.12055	0.0123084	4.97171	2.07335	NA	34.7107	11.315	19.8602	6.68103	14.8632	4.71917	4.41786
329	VAC 064E					Day28			2.895	28.5649	1.60363	9.59306	25.7155	3.12289	46.32	42.374	NA	313.492	216.981	103.562	83.7243	155.208	57.1227	46.7535	16.861	8.49484	13.2538	14.4192	44.347	265.237	93.6431	155.208	51.9381	12.6779	3.25642	0.182815	1.09362	2.9316	0.356013	5.28053	4.83068	NA	35.7384	24.736	11.8062	9.54466	17.6939	6.51204	5.32995
330	VAC 066A	35	f	2019	non responder	Base line			1.92	21.1651	8.57946	3.14117	11.9268	7.48015	45.4178	29.8178	NA	250.788	186.531	78.9216	21.8127	167.456	35.4884	22.9353	3.4844	1.92582	10.9619	9.70349	37.6178	218.659	50.3672	167.456	29.2119	2.70511	3.63811	1.47474	0.539942	2.05013	1.28578	7.80696	5.12545	NA	43.1084	32.0632	13.566	3.74943	28.7845	6.10018	3.9424
331	VAC 066B					Day3			3.765	25.8238	0	13.1326	34.749	13.7641	49.2394	51.4787	NA	411.309	316.608	126.074	47.3586	351.613	52.1629	49.5998	7.04959	5.61549	12.9855	24.2566	50.3591	363.959	86.7162	351.613	50.8813	6.33254	2.26367	0	1.15118	3.04603	1.20654	4.31624	4.51253	NA	36.0546	27.7533	11.0514	4.15137	30.8217	4.57251	4.34783
332	VAC 066C					Day7			4.815	70.2551	29.9419	22.3877	64.4942	36.8319	20.2998	30.9875	NA	580.183	264.568	198.58	66.5444	380.839	154.228	150.99	19.7089	21.4787	40.8616	50.6631	25.6437	422.375	132.562	380.839	152.609	20.5938	4.81547	2.0523	1.53451	4.42061	2.52456	1.3914	2.12397	NA	39.7673	18.1342	13.6112	4.56113	26.1037	10.5712	10.3492
333	VAC 066D					Day11			1.65	17.8739	3.52006	5.88264	8.30937	5.34127	20.4958	6.43622	NA	177.524	95.0926	82.861	27.0328	111.733	28.0116	14.897	0.0493485	0	9.0922	6.82532	13.466	136.308	54.9469	111.733	21.4543	0.0246743	3.57514	0.704082	1.17664	1.66204	1.06836	4.09957	1.28737	NA	35.5083	19.0204	16.5739	5.4071	22.3487	5.60289	2.97969
334	VAC 066E					Day28	common cold		3.405	63.2018	16.9288	6.82302	28.9875	4.50709	114.158	32.9589	80.7831	444.875	356.498	163.602	58.3625	327.02	59.4535	49.8735	0	0	28.9845	16.7473	75.9667	400.686	110.982	327.02	54.6635	0	6.1259	1.64084	0.661328	2.80964	0.436855	11.0649	3.19457	7.82998	43.1199	34.5539	15.8573	5.65684	31.6968	5.76259	4.83404
335	VAC 067A	42	m	2019	responder	Base line			1.83	16.3649	2.91009	2.38353	7.34229	6.12078	30.9333	17.6434	13.2207	259.884	103.459	23.2694	30.4411	124.428	8.13141	14.2089	0.924595	0	7.21949	6.73153	20.5991	181.672	26.8553	124.428	11.1702	0.462297	2.95134	0.524822	0.42986	1.32415	1.10386	5.5787	3.18191	2.38429	46.8689	18.6585	4.19654	5.48993	22.4401	1.46647	2.56253
336	VAC 067B					Day3			3.735	92.0439	47.0472	58.2429	47.2144	39.4795	68.7542	53.3932	178.782	379.193	375.657	112.59	96.7944	268.219	43.158	40.3671	66.0267	96.992	65.778	43.3469	100.31	377.425	104.692	268.219	41.7625	81.5094	8.13321	4.1572	5.14647	4.17197	3.4885	6.07528	4.71795	15.7975	33.5064	33.1939	9.94871	8.55297	23.7005	3.81354	3.56692
337	VAC 067C					Day7	influenza by self report		3.735	45.4891	17.0987	31.0673	86.8629	36.3837	75.9865	94.8508	NA	608.933	315.559	101.454	70.7078	405.872	209.377	134.144	39.9268	44.5878	31.2184	61.6233	85.4187	462.246	86.081	405.872	171.761	42.2573	4.01952	1.51088	2.74518	7.6754	3.21494	6.71434	8.38123	NA	53.8067	27.8835	8.96472	6.2479	35.8638	18.501	11.8533
338	VAC 067D					Day11			4.335	43.779	6.5804	17.9866	33.3619	17.4644	68.5547	62.6021	NA	330.571	262.415	98.0831	35.3727	314.018	64.4423	71.9965	27.3978	9.3764	22.782	25.4132	65.5784	296.493	66.7279	314.018	68.2194	18.3871	3.33299	0.50098	1.36936	2.53992	1.3296	5.21922	4.76604	NA	25.1671	19.9782	7.46728	2.693	23.9069	4.90613	5.48125
339	VAC 067E					Day28			4.35	70.1634	13.4207	0.0200561	5.79651	19.8266	24.4513	43.0587	132.748	400.652	206.61	86.5448	42.6359	283.186	15.7273	63.8635	0	14.6323	27.868	12.8115	66.7525	303.631	64.5904	283.186	39.7954	7.31614	5.32327	1.01822	0.00152165	0.439779	1.50424	1.85511	3.26685	10.0715	30.3973	15.6754	6.56613	3.23477	21.4853	1.19323	4.8453
340	VAC 070A	45	f	2019	responder	Base line			2.55	31.6896	12.1624	16.3547	17.5963	4.0085	24.7641	22.131	NA	435.406	244.55	98.102	85.0651	251.175	44.5018	52.2381	10.1699	8.90632	20.0689	10.8024	23.4475	339.978	91.5835	251.175	48.37	9.53813	4.10142	1.57411	2.1167	2.27739	0.518799	3.20508	2.8643	NA	56.3523	31.6509	12.6968	11.0095	32.5083	5.75963	6.7609
341	VAC 070B					Day3			3.735	35.8312	23.3469	9.41986	4.95887	14.0778	22.3496	37.3168	NA	509.127	468.794	143.49	65.9468	318.523	32.6395	44.456	6.8354	4.31784	22.866	9.51834	29.8332	488.96	104.718	318.523	38.5478	5.57662	3.16612	2.06299	0.83236	0.438177	1.24395	1.97487	3.2974	NA	44.9876	41.4237	12.6791	5.82721	28.1454	2.8841	3.92823
342	VAC 070C					Day7			6.12	30.2844	10.5697	5.13125	58.4293	11.6759	33.1586	53.9089	NA	1108.58	751.287	111.417	20.5185	685.027	107.125	87.446	5.44932	8.61622	15.3284	35.0526	43.5337	929.932	65.9678	685.027	97.2856	7.03277	1.63314	0.569989	0.276713	3.15091	0.629644	1.78814	2.90714	NA	59.7822	40.5146	6.00838	1.1065	36.9414	5.77694	4.7157
343	VAC 070D					Day11			4.275	34.354	0.0698665	0.0814798	16.8425	16.0898	36.3837	21.8352	8.99531	502.094	391.021	162.493	104.614	414.114	87.0306	91.4085	0.0824077	2.51585	11.5018	16.4662	22.4047	446.557	133.554	414.114	89.2196	1.29913	2.65215	0.00539374	0.0062903	1.30025	1.24215	2.80885	1.68569	0.694444	38.762	30.1871	12.5446	8.07631	31.9699	6.71883	7.0568
344	VAC 070E					Day28			4.23	19.48	4.16631	8.33445	14.4974	6.7413	45.6783	33.7047	NA	655.92	461.658	225.58	149.581	420.796	29.0909	36.7256	8.90449	0	10.6603	10.6194	39.6915	558.789	187.581	420.796	32.9082	4.45224	1.51987	0.325064	0.65027	1.13112	0.52597	3.56391	2.62971	NA	51.1762	36.0195	17.6002	11.6706	32.8313	2.26973	2.8654
345	VAC 071A	61	f	2019	responder	Base line			3.03	30.6648	20.512	18.1922	82.3873	41.4569	32.6697	42.5255	NA	476.137	332.573	92.5569	38.1637	362.154	196.658	195.213	7.55837	8.72763	23.123	61.9221	37.5976	404.355	65.3603	362.154	195.936	8.143	3.34006	2.23421	1.98152	8.97378	4.51556	3.55844	4.63196	NA	51.8617	36.2245	10.0815	4.15686	39.4465	21.4204	21.263
346	VAC 071B					Day3			6.495	50.3895	21.4828	5.90839	8.1291	8.78653	53.5771	86.4999	14.7231	677.483	645.106	289.114	82.3014	638.732	41.6636	54.9297	5.82007	3.64638	25.9269	8.45781	51.6	661.294	185.708	638.732	48.2966	4.73322	2.56046	1.09162	0.300225	0.413067	0.446473	2.72243	4.39536	0.74813	34.4252	32.78	14.6909	4.18202	32.4561	2.11707	2.79116
347	VAC 071C					Day7			5.34	32.5379	7.39912	4.35663	35.1963	29.655	59.9184	59.989	NA	788.179	510.285	198.67	97.5709	419.323	60.3927	104.809	15.5029	6.15757	14.7645	32.4256	59.9537	649.232	148.12	419.323	82.601	10.8302	2.01097	0.457295	0.269257	2.17527	1.83279	3.70319	3.70755	NA	48.7125	31.5376	12.2786	6.03027	25.9158	3.7325	6.47763
348	VAC 071D					Day11			8.025	55.5918	12.4101	27.3471	44.1374	35.3442	120.007	65.3415	60.0389	798.836	847.123	398.611	143.546	711.182	93.4201	57.3259	2.60247	22.352	31.783	39.7408	81.796	822.98	271.079	711.182	75.373	12.4772	2.28625	0.510373	1.12467	1.81518	1.45355	4.93538	2.68721	2.46914	32.8526	34.8385	16.3931	5.90343	29.2478	3.84196	2.35756
349	VAC 071E					Day28			4.8	28.1249	14.9482	2.17745	18.838	17.1917	191.273	71.1708	137.64	692.723	603.651	195.352	87.8825	480.15	40.8861	77.8679	14.241	2.01637	15.0835	18.0148	133.361	648.187	141.617	480.15	59.377	8.12871	1.93378	1.02779	0.149715	1.29524	1.18204	13.1513	4.89348	9.46372	47.6295	41.5052	13.4318	6.04253	33.0136	2.8112	5.35395
350	VAC 072A	65	m	2019	non responder	Base line			3.345	15.0651	7.51623	1.96952	5.32558	3.29018	56.5995	35.4943	NA	391.722	264.272	95.0255	47.5323	215.201	13.2331	27.4113	0.270468	0.644251	8.18363	4.30788	46.0469	327.997	71.2789	215.201	20.3222	0.457359	1.48639	0.741586	0.194322	0.525446	0.324625	5.58437	3.50203	NA	38.6491	26.0743	9.37565	4.68975	21.2327	1.30564	2.70452
351	VAC 072B					Day3			5.835	56.6305	4.21726	2.21065	8.54689	5.9038	132.269	51.1592	NA	689.584	459.903	156.284	94.2889	468.506	44.8853	45.7085	7.93523	10.3244	21.0195	7.22534	91.7139	574.744	125.286	468.506	45.2969	9.12983	3.20307	0.238532	0.125037	0.48342	0.333924	7.48124	2.89361	NA	39.0035	26.0126	8.83955	5.33307	26.4991	2.53875	2.58532
352	VAC 072C					Day7			5.805	27.9703	7.62238	5.9599	23.5958	6.49415	105.795	51.1635	NA	792.007	420.942	134.272	63.6339	427.403	55.1615	70.3188	0	2.07419	13.8509	15.045	78.4792	606.474	98.9531	427.403	62.7401	1.0371	1.5902	0.433357	0.338839	1.3415	0.369213	6.01478	2.90881	NA	45.0281	23.9319	7.63382	3.61779	24.2992	3.13611	3.99785
353	VAC 072D					Day11			4.995	27.4648	2.0601	10.2583	21.6908	9.76005	73.6984	39.7084	75.7666	437.514	438.514	82.854	66.5003	388.241	51.7773	38.5018	3.65396	20.0952	13.2611	15.7254	63.0578	438.014	74.6771	388.241	45.1396	11.8746	1.81467	0.136116	0.677792	1.43317	0.644873	4.86945	2.62364	5.00611	28.9078	28.9738	5.47439	4.39385	25.6521	3.42107	2.54392
354	VAC 072E					Day28			5.04	17.4202	9.88656	2.58348	3.82345	12.6563	95.502	37.3935	NA	725.444	347.289	153.055	47.329	281.284	37.6269	28.3843	7.43111	0	9.96341	8.23989	66.4478	536.366	100.192	281.284	33.0056	3.71556	1.14072	0.647399	0.169173	0.25037	0.828771	6.25374	2.44863	NA	47.5041	22.7414	10.0225	3.09923	18.4192	2.46391	1.85868
355	VAC 073A	38	f	2019	non responder	Base line			3.075	19.4827	10.3015	5.96698	20.173	0.11338	70.6445	52.6189	18.4135	376.719	330.136	NA	34.7359	288.061	46.7528	35.1626	0.203068	3.9772	11.9171	10.1432	47.2256	353.427	34.7359	288.061	40.9577	2.09013	2.09104	1.10563	0.640423	2.16513	0.0121688	7.58212	5.64747	1.97628	40.4324	35.4327	NA	3.72813	30.917	5.01788	3.77393
356	VAC 073B					Day3			3.84	41.6886	11.568	15.7179	0.497486	0.459863	108.74	65.8716	NA	249.967	434.088	120.677	22.4176	371.718	6.94602	12.2544	0.06138	0	22.9915	0.478675	87.3059	342.028	71.5472	371.718	9.6002	0.03069	3.58297	0.994227	1.35089	0.042757	0.0395235	9.34579	5.66141	NA	21.4837	37.3082	10.3717	1.9267	31.9477	0.596984	1.05322
357	VAC 073C					Day7			2.835	24.3612	22.8884	1.93493	15.2317	11.5382	47.9734	29.5074	NA	301.15	271.618	50.8882	18.587	292.557	80.8463	66.9095	0.0697981	6.66132	16.3948	13.385	38.7404	286.384	34.7376	292.557	73.8779	3.36556	2.83598	2.66453	0.225252	1.77318	1.3432	5.58476	3.43507	NA	35.058	31.6201	5.92409	2.16379	34.0576	9.41162	7.78919
358	VAC 073D					Day11			5.985	48.9648	13.5717	16.2316	71.5885	63.0711	73.6318	62.2535	47.7225	687.242	853.368	190.843	45.7637	700.226	167.868	149.482	10.1752	8.28792	26.256	67.3298	61.2026	770.305	118.304	700.226	158.675	9.23157	2.70008	0.74839	0.895067	3.94763	3.47795	4.0603	3.43287	2.63158	37.8968	47.0576	10.5237	2.52356	38.6128	9.2568	8.24294
359	VAC 073E					Day28			2.985	23.8695	6.592	9.97617	29.7561	0.0602047	33.2481	34.6485	NA	245.869	341.255	160.023	49.8669	302.704	15.1246	42.51	6.7584	2.36349	13.4792	14.9081	33.9483	293.562	104.945	302.704	28.8173	4.56095	2.6391	0.728837	1.103	3.28994	0.00665646	3.67604	3.83087	NA	27.1843	37.7304	17.6928	5.51347	33.4681	1.67223	4.70007
360	VAC 074A	48	f	2019	immuned	Base line			1.59	18.0389	0.651786	5.00481	4.38398	1.54505	39.7554	14.6454	16.1078	268.511	139.661	50.8457	20.4265	150.676	15.3269	24.9593	0	0.839686	7.89851	2.96452	23.5029	204.086	35.6361	150.676	20.1431	0.419843	3.7443	0.13529	1.03884	0.909974	0.320704	8.25195	3.03991	3.34347	55.7342	28.9892	10.5539	4.23988	31.2754	3.18136	5.18075
361	VAC 074B					Day3			4.665	59.9717	14.6613	13.5032	1.59898	11.3116	90.6668	59.685	NA	506.73	458.585	191.447	70.9887	364.043	28.7578	27.3431	6.37028	2.13099	29.3787	6.45527	75.1759	482.658	131.218	364.043	28.0504	4.25064	4.24279	1.03723	0.955305	0.113122	0.800255	6.41437	4.22251	NA	35.8495	32.4433	13.5442	5.02221	25.7548	2.03451	1.93443
362	VAC 074C					Day7			6.885	64.8296	16.6117	29.3348	30.145	7.36478	106.647	142.82	78.9015	1033.57	828.544	241.12	68.0401	716.074	103.725	77.1724	9.01767	0	36.9254	18.7549	109.456	931.055	154.58	716.074	90.4488	4.50884	3.10761	0.796284	1.40616	1.445	0.353031	5.11211	6.84608	3.78215	49.544	39.7163	11.5581	3.26151	34.3251	4.97208	3.69927
363	VAC 074D					Day11			5.505	64.3309	30.4437	17.5937	20.4892	6.58399	45.8184	56.6064	205.022	735.809	702.595	198.626	142.173	527.62	74.5975	37.9546	4.16434	10.9463	37.4561	13.5366	102.482	719.202	170.399	527.62	56.2761	7.5553	3.85674	1.82515	1.05477	1.22836	0.39472	2.74688	3.39364	12.2914	44.1129	42.1216	11.9079	8.52346	31.6316	4.47223	2.27544
364	VAC 074E					Day28			6.9	48.638	9.69342	9.04742	12.2674	8.37675	104.252	64.8884	109.683	1087.89	712.91	241.811	130.449	680.9	53.6559	67.1204	0.173467	7.42021	22.4596	10.3221	92.9412	900.401	186.13	680.9	60.3881	3.79684	2.3264	0.463645	0.432746	0.58676	0.400667	4.98646	3.10367	5.24625	52.0348	34.0991	11.566	6.23947	32.568	2.56641	3.21043
365	VAC 075A	36	f	2019	responder	Base line			4.8	42.0739	5.54174	14.7578	23.9656	14.3617	53.3709	47.5247	47.3906	820.098	478.627	NA	63.1881	511.053	38.7534	35.7993	3.75935	2.59324	20.7911	19.1636	49.4287	649.362	63.1881	511.053	37.2764	3.17629	2.89287	0.381033	1.0147	1.6478	0.987466	3.66962	3.26765	3.25843	56.3874	32.9089	NA	4.34461	35.1384	2.66456	2.46145
366	VAC 075B					Day3			4.56	51.897	30.3134	14.8989	6.24949	5.97332	27.9977	33.9237	6.31866	464.124	350.573	97.6849	60.3212	358.97	28.1604	37.2931	7.34533	5.3716	32.3698	6.11141	22.7467	407.349	79.0031	358.97	32.7267	6.35846	3.75608	2.19395	1.07832	0.452311	0.432323	2.02636	2.45525	0.457317	33.5913	25.373	7.07001	4.36579	25.9807	2.03813	2.69911
367	VAC 075C					Day7			5.265	144.689	191.891	69.5851	91.3585	38.5483	94.5284	54.3595	NA	761.07	568.737	111.951	124.425	586.279	94.1416	130.228	51.6495	35.9726	135.388	64.9534	74.4439	664.903	118.188	586.279	112.185	43.8111	9.06974	12.0285	4.36189	5.72674	2.41637	5.92545	3.40749	NA	47.7072	35.6509	7.01754	7.79949	36.7505	5.9012	8.16327
368	VAC 075D					Day11			4.485	12.1663	4.97289	6.04278	8.97423	3.49073	24.9614	23.4846	NA	574.984	328.857	115.409	53.0381	400.479	29.3541	40.2685	2.27151	0	7.72734	6.23248	24.223	451.921	84.2237	400.479	34.8113	1.13575	0.895272	0.365935	0.444664	0.660377	0.256868	1.83681	1.72814	NA	42.3107	24.1993	8.4925	3.90286	29.4696	2.16005	2.96319
369	VAC 075E					Day28			3.405	32.4304	2.04342	8.31235	23.9069	18.1972	13.2175	33.885	NA	544.798	297.913	43.7531	19.878	351.394	43.7148	43.37	6.08187	5.85083	14.2621	21.052	23.5512	421.355	31.8156	351.394	43.5424	5.96635	3.14335	0.19806	0.805683	2.3172	1.76378	1.28112	3.28434	NA	52.8051	28.8755	4.24081	1.9267	34.0592	4.2371	4.20368
370	VAC 077A	51	f	2019	responder	Base line			5.61	88.6072	45.0579	48.3	62.8631	49.878	78.1459	58.0692	438.036	847.337	782.569	NA	94.7925	613.93	68.5415	64.4954	25.9966	33.7273	60.655	56.3706	191.417	814.953	94.7925	613.93	66.5185	29.8619	5.21271	2.65073	2.84146	3.6982	2.93429	4.59728	3.41618	25.7694	49.8483	46.0381	NA	5.57659	36.1171	4.03226	3.79423
371	VAC 077B					Day3			4.35	442.253	502.452	350.539	547.939	299.479	579.434	361.975	NA	953.909	722.158	377.576	499.13	751.662	532.906	493.86	373.619	384.322	431.748	423.709	470.704	838.034	438.353	751.662	513.383	378.971	33.5536	38.1209	26.5953	41.572	22.7214	43.9614	27.4629	NA	72.3727	54.7899	28.6466	37.8688	57.0284	40.4314	37.469
372	VAC 077C					Day7			9.69	131.241	17.7704	30.3755	46.9696	34.721	112.094	146.34	NA	1170.29	1180.02	147.435	68.9283	971.824	92.1549	131.686	10.0567	4.77211	59.7956	40.8453	129.217	1175.16	108.182	971.824	111.921	7.41438	4.46995	0.605245	1.03456	1.59974	1.18257	3.81781	4.98422	NA	39.8591	40.1905	5.0215	2.34764	33.0995	3.13872	4.48511
373	VAC 077D					Day11			5.16	52.6298	7.48326	4.75103	13.3187	2.61703	68.0395	56.4934	NA	709.156	562.612	128.372	47.984	425.06	19.1645	45.6277	2.63077	0	21.6214	7.96788	62.2664	635.884	88.1782	425.06	32.3961	1.31538	3.36619	0.478629	0.303875	0.851865	0.167385	4.3518	3.61331	NA	45.3575	35.9846	8.21068	3.06905	27.1868	1.22576	2.91834
374	VAC 077E					Day28			3.63	30.3727	10.2629	8.36085	29.016	18.7149	29.9014	20.5681	NA	505.945	301.353	42.4058	43.1934	293.396	63.6621	64.7852	0	7.02805	16.3322	23.8655	25.2348	403.649	42.7996	293.396	64.2236	3.51403	2.76144	0.933085	0.760153	2.63808	1.70152	2.71858	1.87002	NA	45.9996	27.3984	3.85546	3.92707	26.675	5.78804	5.89015
375	VAC 078A	45	f	2019	responder	Base line			3.63	35.4345	3.77203	14.732	21.6593	17.9785	103.785	37.7259	NA	492.796	360.465	93.4204	46.7656	305.83	32.146	42.7306	6.91201	0	17.9795	19.8189	70.7555	426.63	70.093	305.83	37.4383	3.45601	3.22164	0.342946	1.3394	1.96922	1.63457	9.43595	3.42997	NA	44.8041	32.7728	8.49362	4.25184	27.8055	2.92266	3.88499
376	VAC 078B					Day3			5.46	87.0245	37.1471	11.9569	27.2165	2.55596	66.2746	66.1752	NA	363.374	339.062	128.434	78.1024	312.973	59.085	94.9855	5.43837	7.83067	45.3761	14.8862	66.2249	351.218	103.268	312.973	77.0353	6.63452	5.26025	2.24538	0.72274	1.64512	0.154496	4.00601	4	NA	21.9644	20.4948	7.76326	4.72095	18.9179	3.57143	5.74146
377	VAC 078C					Day7			4.665	36.3446	17.6978	0.118361	26.7918	1.40779	113.147	31.6609	76.7978	391.667	173.744	98.7997	66.2023	240.027	43.4621	35.7639	3.09511	11.3111	18.0536	14.0998	73.8687	282.706	82.501	240.027	39.613	7.20311	2.57126	1.25206	0.00837367	1.89543	0.0995961	8.00479	2.2399	5.43319	27.7091	12.2918	6.98975	4.68359	16.9811	3.0748	2.53017
378	VAC 078D					Day11			3.405	37.8549	8.91752	8.33838	9.84814	3.71616	99.1411	39.4047	NA	298.387	263.048	60.6345	23.6824	196.793	48.6616	23.0122	0.0774793	0	18.3703	6.78215	69.2729	280.717	42.1584	196.793	35.8369	0.0387397	1.243	0.684932	0.914192	0.850643	0.0469318	5.57345	3.4298	0.644122	25.4941	28.021	8.70621	4.25095	16.6903	2.10468	4.77294
379	VAC 078E					Day28			4.02	50.1313	11.8112	28.2146	116.491	49.6172	38.0498	46.5987	24.8584	511.301	434.579	121.507	69.3972	479.802	225.054	220.295	7.30347	13.1412	30.0524	83.0543	36.5023	472.94	95.4519	479.802	222.675	10.2224	4.11567	0.969675	2.31635	9.56369	4.07346	3.1238	3.82565	2.04082	41.9766	35.678	9.97542	5.69735	39.3907	18.4765	18.0858
380	VAC 079A	42	f	2019	responder	Base line			7.725	76.0549	3.37547	11.2726	43.3064	48.996	187.594	85.3045	NA	1048.03	740.657	380.927	305.746	596.939	149.639	149.267	4.52729	4.50354	30.2344	46.1512	136.449	894.342	343.336	596.939	149.453	4.51541	3.24927	0.144209	0.481598	1.85017	2.09324	8.01455	3.64444	NA	44.7746	31.6429	16.2742	13.0623	25.5028	6.39297	6.37709
381	VAC 079B					Day3			4.995	67.8468	39.9418	30.7266	55.9072	21.2809	68.0827	67.9929	NA	430.299	374.883	294.821	180.376	399.779	119.677	67.8613	3.03475	0	46.1717	38.5941	68.0378	402.591	237.599	399.779	93.7691	1.51738	4.48282	2.63906	2.03019	3.69394	1.40608	4.4984	4.49247	NA	28.431	24.7696	19.4796	11.9179	26.4145	7.90738	4.48378
382	VAC 079C					Day7			5.085	41.9901	1.58514	7.88587	7.44696	0.104112	78.7159	55.9112	NA	446.85	477.919	262.018	86.4772	357.026	38.0351	57.0257	3.74011	0	17.1537	3.77554	67.3136	462.385	174.248	357.026	47.5304	1.87005	2.72529	0.102881	0.511819	0.483332	0.00675721	5.10892	3.62882	NA	29.002	31.0185	17.0058	5.61265	23.1722	2.4686	3.70115
383	VAC 079D					Day11			3.78	41.1338	17.6402	0	3.86546	0.0629187	58.2631	12.234	NA	373.636	321.191	250.809	140.568	200.542	47.8606	42.4467	0.0268311	0	19.5914	1.96419	35.2486	347.413	195.689	200.542	45.1537	0.0134156	3.59141	1.54017	0	0.337495	0.00549345	5.08697	1.06815	NA	32.6222	28.0432	21.8982	12.2731	17.5094	4.17873	3.70604
384	VAC 079E					Day28			6.45	69.7807	26.8261	26.1723	147.307	58.6588	73.1514	80.2536	15.4494	821.445	750.969	252.473	98.8388	753.039	306.9	300.411	11.5718	15.7944	40.9264	102.983	56.2848	786.207	175.656	753.039	303.655	13.6831	3.57053	1.37264	1.33918	7.53737	3.00145	3.74301	4.10641	0.790514	42.0316	38.4255	12.9185	5.05737	38.5314	15.7034	15.3714
385	VAC 080A	44	f	2019	responder	Base line			3.06	47.5758	14.1454	4.21561	17.6639	1.17509	63.5751	52.274	15.3761	413.089	412.343	118.601	42.2376	283.594	19.3521	31.4248	2.82324	2.59127	21.9789	9.4195	43.7417	412.716	80.4192	283.594	25.3884	2.70725	5.13123	1.52564	0.45467	1.90512	0.126738	6.85682	5.63796	1.65837	44.5532	44.4728	12.7915	4.55549	30.5867	2.0872	3.38928
386	VAC 080B					Day3			7.245	115.822	6.71223	24.2296	60.6471	25.4447	156.496	168.915	NA	1062.09	872.153	244.1	116.024	705.744	162.647	99.4166	9.62262	21.108	48.9214	43.0459	162.706	967.121	180.062	705.744	131.032	15.3653	5.27608	0.305764	1.10374	2.76267	1.15909	7.12889	7.69463	NA	48.3815	39.7294	11.1195	5.28529	32.1489	7.40907	4.52875
387	VAC 080C					Day7			7.515	167.803	107.279	50.0704	46.0799	17.6801	92.5535	117.032	133.944	1167.55	1211.48	209.912	98.2092	838.457	93.75	103.655	8.52734	10.066	108.384	31.88	114.51	1189.52	154.061	838.457	98.7024	9.29666	7.36933	4.71135	2.19892	2.02367	0.776449	4.06463	5.13964	5.88235	51.2749	53.204	9.21862	4.31301	36.8222	4.11718	4.55216
388	VAC 080D					Day11			7.605	104.831	4.81159	13.7427	39.9111	0.378253	206.102	131.347	NA	1368.96	1268.96	260.744	103.42	853.897	97.0359	122.77	3.21787	0	41.1286	20.1447	168.725	1318.96	182.082	853.897	109.903	1.60893	4.54935	0.208808	0.596391	1.73202	0.016415	8.94418	5.70006	NA	59.4087	55.069	11.3155	4.48811	37.0565	4.21105	5.32782
389	VAC 080E					Day28			4.44	69.6733	11.8397	19.0603	65.882	48.5628	72.5277	68.1977	24.0566	560.786	377.864	185.011	67.2399	447.907	70.2142	119.206	7.94607	3.88569	33.5245	57.2224	54.9273	469.325	126.126	447.907	94.7099	5.91588	5.17894	0.880065	1.41679	4.89713	3.60976	5.39111	5.06926	1.78817	41.6842	28.0873	13.7522	4.99806	33.2937	5.21915	8.86076
390	VAC 081A	40	f	2019	responder	Base line			7.17	5.23412	9.42748	12.7739	17.5951	23.7879	25.6192	95.4601	NA	993.789	1048.41	196.474	49.9568	767.815	54.752	134.521	7.39273	10.2904	9.14518	20.6915	60.5397	1021.1	123.216	767.815	94.6364	8.84157	0.240925	0.433944	0.587981	0.809895	1.09495	1.17925	4.394	NA	45.7438	48.2582	9.04366	2.2995	35.3423	2.52022	6.19195
391	VAC 081B					Day3	common cold		4.26	17.9339	33.7796	14.3083	45.3194	27.8757	38.4111	37.9885	NA	513.023	546.864	101.001	45.7043	464.692	95.7013	111.733	5.18077	16.1932	22.0072	36.5976	38.1998	529.944	73.3524	464.692	103.717	10.687	1.38938	2.61699	1.1085	3.51101	2.1596	2.97581	2.94307	NA	39.7452	42.367	7.82477	3.54082	36.0009	7.41423	8.65622
392	VAC 081C					Day7	common cold		3.81	33.3868	12.9558	6.53768	38.7954	9.84805	46.1975	34.1792	NA	332.667	189.251	98.6851	57.1285	324.507	57.7593	66.8933	18.6693	14.0926	17.6267	24.3217	40.1883	260.959	77.9068	324.507	62.3263	16.3809	2.89206	1.12227	0.566312	3.36057	0.853066	4.00176	2.9607	NA	28.8165	16.3934	8.54839	4.94863	28.1097	5.00328	5.79449
393	VAC 081D					Day11			2.715	12.0129	0	6.51931	17.6366	9.14868	22.2027	19.8784	NA	367.182	223.022	63.6324	33.1953	250.37	17.1857	25.5855	0	0	6.17741	13.3926	21.0406	295.102	48.4139	250.37	21.3856	0	1.46028	0	0.792481	2.14389	1.11211	2.69894	2.41641	NA	44.6344	27.1103	7.7351	4.03519	30.4348	2.08908	3.11015
394	VAC 081E					Day28			6.045	47.2526	18.7846	29.3277	76.3669	26.7327	46.7947	53.7712	20.6858	842.401	699.186	137.582	48.818	698.527	193.057	167.716	8.43784	15.0565	31.7883	51.5498	40.4172	770.793	93.2002	698.527	180.386	11.7472	2.57981	1.02557	1.60117	4.16933	1.4595	2.5548	2.93569	1.12936	45.9917	38.1728	7.51145	2.66527	38.1368	10.5401	9.1566
395	VAC 082A	22	m	2019	responder	Base line			3.105	17.1037	1.45113	4.00787	10.9276	3.38921	40.6253	13.5894	NA	370.406	258.327	70.2715	26.8738	357.187	22.2684	12.2961	6.89787	5.10157	7.5209	7.15841	27.1073	314.367	48.5727	357.187	17.2822	5.99972	1.81797	0.154242	0.426	1.1615	0.360242	4.31809	1.44443	NA	39.3708	27.4578	7.46922	2.85644	37.9657	2.36693	1.30696
396	VAC 082B					Day3			5.46	30.1084	15.3285	19.0461	20.407	4.00568	42.6876	21.7799	NA	436.627	462.83	127.363	41.5915	448.529	44.2721	59.2002	0	5.79304	21.4943	12.2063	32.2338	449.728	84.4771	448.529	51.7362	2.89652	1.81992	0.926539	1.15125	1.23351	0.242126	2.58028	1.3165	NA	26.3922	27.976	7.69852	2.51402	27.1116	2.67605	3.57839
397	VAC 082C					Day7			5.955	39.1232	62.2362	15.255	36.6686	20.0139	28.7085	37.0976	63.534	442.021	432.654	127.615	111.764	338.473	66.7647	18.4142	8.78964	12.6664	38.8715	28.3413	43.1134	437.338	119.69	338.473	42.5894	10.728	2.16825	3.44921	0.845448	2.03222	1.1092	1.59106	2.05599	3.52113	24.4973	23.9782	7.07256	6.19411	18.7586	3.70018	1.02054
398	VAC 082D					Day11			5.4	37.2514	11.1717	15.435	12.9115	7.86255	86.5969	34.2508	NA	563.276	342.14	88.9567	62.8804	374.36	32.5547	55.4644	0	0	21.286	10.387	60.4239	452.708	75.9185	374.36	44.0096	0	2.2767	0.682783	0.943343	0.789118	0.480537	5.29256	2.09331	NA	34.4258	20.9106	5.43678	3.84307	22.8799	1.98965	3.38983
399	VAC 082E					Day28			8.52	72.7028	37.4259	27.8031	94.481	38.793	43.4206	45.845	15.2956	932.841	782.178	157.951	55.5374	792.036	127.286	102.871	7.77578	7.62463	45.9773	66.637	34.8537	857.509	106.744	792.036	115.079	7.7002	2.81624	1.44974	1.07699	3.65984	1.50269	1.68195	1.77586	0.592495	36.1348	30.2987	6.11844	2.15131	30.6805	4.9306	3.98484
400	VAC 084A	40	f	2019	non responder	Base line	common cold-sore throat		7.995	40.3095	14.1666	16.7307	14.8246	16.3427	128.376	117.95	NA	892.255	NA	244.513	38.0842	770.663	10.6872	30.3346	0.0554738	0.0462183	23.7356	15.5836	123.163	892.255	141.298	770.663	20.5109	0.050846	1.66397	0.584795	0.690641	0.611959	0.674624	5.29937	4.86896	NA	36.8322	NA	10.0935	1.57211	31.8129	0.441168	1.25221
401	VAC 084B					Day3			16.65	95.0932	41.7109	36.5437	83.6308	37.21	200.638	185.864	137.327	2019.58	1818.38	520.35	114.19	1783.21	154.352	197.721	5.4742	7.73553	57.7826	60.4204	174.609	1918.98	317.27	1783.21	176.037	6.60487	1.88492	0.826785	0.724361	1.65771	0.73757	3.977	3.68415	2.72206	40.0316	36.0435	10.3143	2.26346	35.3465	3.05953	3.91919
402	VAC 084C					Day7			10.995	60.0087	23.3332	39.4711	126.801	19.9244	114.698	107.278	7.88517	1312.37	1276.54	349.448	90.7716	1271.09	193.416	167.198	5.83953	4.7992	40.9377	73.3628	76.6204	1294.45	220.11	1271.09	180.307	5.31937	1.80126	0.700385	1.18479	3.80615	0.598064	3.44285	3.22013	0.236686	39.3929	38.3174	10.4893	2.72466	38.154	5.80571	5.01872
403	VAC 084D					Day11			17.25	51.9165	18.1934	44.1841	65.7329	15.2989	170.235	176.402	NA	2506.11	1912.5	497.857	81.9023	1854.86	82.5346	149.314	8.81143	6.04055	38.098	40.5159	173.318	2209.3	289.88	1854.86	115.924	7.42599	0.993285	0.348083	0.845345	1.25762	0.292703	3.25699	3.37498	NA	47.9477	36.5905	9.52518	1.56698	35.4878	1.57908	2.85672
404	VAC 084E					Day28			8.79	82.5306	64.3263	39.688	148.704	46.474	117.839	71.454	65.2787	1117.73	923.858	191.179	74.5117	930.562	207.596	120.108	4.12671	17.0613	62.1816	97.5888	84.8571	1020.79	132.845	930.562	163.852	10.594	3.09873	2.41522	1.49014	5.58329	1.74493	4.42441	2.68284	2.45098	41.9668	34.6876	7.17808	2.79765	34.9393	7.7945	4.50961
405	VAC 085A	44	f	2019	non responder	Base line			3.75	19.2377	13.1524	14.8335	32.1656	7.5181	23.0413	27.1154	NA	288.381	325.525	154.677	53.3334	333.544	27.6297	34.9562	13.7836	2.68336	15.7412	19.8419	25.0784	306.953	104.005	333.544	31.293	8.23347	1.69309	1.15753	1.30548	2.83086	0.661659	2.02784	2.3864	NA	25.3801	28.649	13.6129	4.69381	29.3548	2.43166	3.07645
406	VAC 085B					Day3			4.41	21.8167	0.183271	13.5483	16.2017	4.7212	29.0066	22.5988	NA	478.529	393.514	198.992	69.5552	435.898	51.1742	52.7189	8.95898	5.25262	11.8494	10.4615	25.8027	436.021	134.274	435.898	51.9466	7.1058	1.76392	0.39604	0.722767	1.38672	0.450888	1.57446	1.16603	NA	39.2876	28.786	10.7824	3.9454	34.9972	2.80568	2.72663
407	VAC 085C					Day7			5.88	26.0728	0	14.1376	44.3781	13.7167	42.792	58.0328	6.0089	556.048	484.898	188.074	65.6107	538.586	25.9858	46.597	22.8842	0.0653261	13.4035	29.0474	35.6112	520.473	126.842	538.586	36.2914	11.4748	1.46341	0	0.793516	2.49086	0.769893	2.40183	3.25727	0.337268	31.2099	27.2164	10.5562	3.6826	30.2298	1.45853	2.6154
408	VAC 085D					Day11			4.83	17.6698	12.1219	9.12994	23.7781	11.6107	39.5014	35.5799	NA	654.09	346.43	162.909	45.9301	411.988	65.4833	58.2502	5.2037	8.78716	12.9739	17.6944	37.5407	500.26	104.42	411.988	61.8667	6.99543	1.20737	0.828289	0.623847	1.62475	0.793358	2.69912	2.43117	NA	44.6938	23.6715	11.1315	3.1384	28.1511	4.47446	3.98023
409	VAC 085E					Day28			6.015	42.8606	20.8169	21.038	105.882	61.5819	29.7317	61.68	19.6577	695.214	553.194	190.881	48.2943	665.119	270.123	233.49	6.19335	9.54183	28.2385	83.7322	37.0231	624.204	119.588	665.119	251.806	7.86759	2.35169	1.14219	1.15432	5.80959	3.3789	1.63133	3.38428	1.07858	38.1452	30.3528	10.4733	2.64983	36.494	14.8212	12.8112
410	VAC 086A	38	m	2019	responder	Base line			3.63	16.4402	0	10.1541	35.492	30.7769	27.3422	4.64053	NA	215.371	175.606	78.1616	36.7891	147.887	35.999	33.2603	20.995	34.5624	8.86479	33.1344	15.9914	195.488	57.4754	147.887	34.6296	27.7787	1.49472	0	0.923196	3.22686	2.79818	2.4859	0.421909	NA	19.5811	15.9658	7.10631	3.3448	13.4456	3.27296	3.02396
411	VAC 086B					Day3			8.46	105.61	129.953	67.0739	102.871	34.8613	139.272	52.434	81.0171	636.695	479.15	155.099	157.179	458.927	111.355	124.174	79.231	75.8766	100.879	68.8661	90.9076	557.923	156.139	458.927	117.764	77.5538	4.11996	5.06958	2.61662	4.01309	1.35997	5.43313	2.0455	3.16056	24.8381	18.6921	6.05055	6.1317	17.9032	4.34406	4.84414
412	VAC 086C					Day7			2.805	17.9185	4.43399	1.45107	5.72046	8.90091	5.24036	5.87861	1.4025	270.565	145.21	43.4934	26.0223	152.965	16.8374	18.5606	3.03639	5.36251	7.93452	7.31069	4.17382	207.888	34.7578	152.965	17.699	4.19945	2.10827	0.521698	0.170731	0.673063	1.04727	0.616575	0.69167	0.165017	31.8344	17.0853	5.11738	3.06175	17.9977	1.98106	2.18382
413	VAC 086D					Day11			4.455	29.2722	8.44454	4.59468	18.3086	10.0838	60.8027	26.9099	29.927	415.926	244.23	78.0212	61.1098	260.19	23.7756	52.0996	6.38642	0	14.1038	14.1962	39.2132	330.078	69.5655	260.19	37.9376	3.19321	2.16853	0.625584	0.340381	1.35633	0.747022	4.50436	1.99353	2.21704	30.8124	18.0929	5.77993	4.5271	19.2753	1.76133	3.85962
414	VAC 086E					Day28			9.885	50.82	82.2803	27.3026	79.2194	28.9855	100.618	69.1829	40.6776	990.767	606.026	149.57	86.1589	702.925	110.365	164.548	4.86176	0.299216	53.4677	54.1025	70.1597	798.397	117.864	702.925	137.456	2.58049	1.69674	2.74711	0.911559	2.64492	0.967746	3.35938	2.30983	1.35811	33.079	20.2336	4.99373	2.87661	23.4687	3.68479	5.49379
415	VAC 087A	37	m	2019	responder	Base line			4.965	41.0688	13.0169	15.7274	36.2641	23.348	196.881	43.1936	129.482	492.358	379.738	NA	118.664	297.303	69.1433	69.1393	7.77188	11.0294	23.271	29.806	123.186	436.048	118.664	297.303	69.1413	9.40065	2.72992	0.865257	1.04543	2.41054	1.55198	13.0871	2.87116	8.60692	32.728	25.2419	NA	7.88782	19.7623	4.59608	4.59582
416	VAC 087B					Day3			5.415	53.2665	1.10191	0.211559	26.1033	19.3135	128.46	34.7635	NA	434.246	365.19	140.145	111.324	253.428	28.264	44.5576	1.66101	15.2156	18.1933	22.7084	81.6119	399.718	125.734	253.428	36.4108	8.43829	3.24648	0.0671592	0.0128941	1.59094	1.17712	7.82938	2.11876	NA	26.4664	22.2576	8.54152	6.78499	15.4459	1.72263	2.71569
417	VAC 087C					Day7			2.925	34.9818	33.8174	5.07438	24.9923	4.20602	71.2893	37.1778	NA	324.461	214.947	72.0796	75.8506	157.394	27.0206	48.9192	0	0	24.6245	14.5991	54.2335	269.704	73.9651	157.394	37.9699	0	3.94706	3.81568	0.572551	2.81992	0.474572	8.04369	4.19484	NA	36.6095	24.2528	8.13288	8.55836	17.7591	3.04878	5.51964
418	VAC 087D					Day11			4.665	84.3833	67.4849	25.2992	43.4996	19.5831	82.6031	39.1093	132.453	498.114	286.273	117.571	62.383	291.264	100.317	70.2594	0	9.74824	59.0558	31.5414	84.7219	392.194	89.977	291.264	85.2879	4.87412	5.96983	4.77433	1.78983	3.07745	1.38544	5.84389	2.76685	9.37063	35.2399	20.2528	8.31776	4.41339	20.6059	7.09706	4.97061
419	VAC 087E					Day28			6.15	76.5949	14.8048	38.975	119.439	57.9516	85.4247	94.5052	15.107	842.23	656.438	158.426	82.5558	662.556	273.744	327.934	16.3596	21.0719	43.4582	88.6954	65.0123	749.334	120.491	662.556	300.839	18.7158	4.11038	0.794484	2.09155	6.40957	3.10991	4.58422	5.07152	0.810701	45.1973	35.227	8.50177	4.43026	35.5553	14.6902	17.5982
420	VAC 088A	38	m	2019	non responder	Base line			10.59	57.9371	6.41853	18.6075	17.5627	17.064	158.238	78.9771	89.2784	1566.63	1032.07	NA	131.596	1129.73	35.1297	44.3353	0.379018	0	27.6544	17.3134	108.831	1299.35	131.596	1129.73	39.7325	0.189509	1.80559	0.200031	0.579894	0.547334	0.531793	4.93144	2.46129	2.78232	48.8235	32.1641	NA	4.10114	35.2076	1.0948	1.38169
421	VAC 088B					Day3			15.9	66.1368	18.3299	12.6427	65.2701	38.4264	263.462	205.048	222.765	2281.75	1730.99	413.49	149.318	2115.02	155.42	143.816	1.60212	8.40785	32.3698	51.8483	230.425	2006.37	281.404	2115.02	149.618	5.00499	1.37279	0.380469	0.262423	1.3548	0.79761	5.46863	4.25614	4.62388	47.3617	35.9298	8.58272	3.09937	43.901	3.22601	2.98515
422	VAC 088C					Day7			6.81	45.5237	NA	0.752485	53.029	6.29095	71.0188	55.4304	NA	586.947	NA	NA	132.701	676.423	22.5881	NA	0.343905	0	23.1381	29.66	63.2246	586.947	132.701	676.423	22.5881	0.171953	2.20622	NA	0.0364677	2.56994	0.304878	3.44178	2.68632	NA	28.4452	NA	NA	6.4311	32.7815	1.09469	NA
423	VAC 088D					Day11			9.09	47.5549	18.0839	11.5571	23.3128	8.62787	111.441	104.098	NA	1272.74	949.796	253.015	119.234	927.031	59.2145	44.6047	0	3.36073	25.7319	15.9703	107.769	1111.27	186.124	927.031	51.9096	1.68036	1.72659	0.656576	0.419605	0.846424	0.313254	4.04612	3.7795	NA	46.2098	34.4845	9.18627	4.32905	33.658	2.14992	1.61948
424	VAC 088E					Day28			8.295	48.6897	9.98167	20.8583	31.1863	1.20749	117.875	107.337	116.968	982.084	929.823	288.389	112.664	903.888	97.3663	92.9218	0	12.3641	26.5099	16.1969	114.06	955.954	200.526	903.888	95.144	6.18206	1.93722	0.397141	0.829887	1.24081	0.0480423	4.68988	4.27063	4.6538	39.0742	36.9949	11.4741	4.48255	35.963	3.87391	3.69708
425	VAC 089A	37	m	2019	responder	Base line			9.42	27.549	0	0	10.2048	4.97457	242.8	146.502	144.924	1681.68	1431.21	NA	58.0616	1152.46	44.6469	49.9909	4.33244	5.01992	9.183	7.58967	178.075	1556.44	58.0616	1152.46	47.3189	4.67618	0.965189	0	0	0.357527	0.174286	8.50659	5.13274	5.07745	58.9182	50.1429	NA	2.03421	40.3769	1.56422	1.75145
426	VAC 089B					Day3			11.34	62.0509	5.55765	7.51851	43.4002	7.35383	424.955	208.611	374.514	1616.11	1593.1	349.178	73.5833	1219.17	69.3254	43.9606	14.6335	33.1941	25.0424	25.377	336.027	1604.6	211.381	1219.17	56.643	23.9138	1.8059	0.161747	0.218814	1.26309	0.214022	12.3677	6.0713	10.8997	47.0344	46.3646	10.1623	2.14153	35.4821	2.01761	1.27941
427	VAC 089C					Day7			5.79	59.588	14.4109	1.73288	14.8858	3.05543	130.925	83.6064	108.015	950.897	772.987	147.225	42.2438	644.738	35.0196	49.6566	0.635987	0	25.2439	8.97061	107.515	861.942	94.7342	644.738	42.3381	0.317993	3.39655	0.82143	0.0987753	0.848499	0.174161	7.46278	4.76561	6.1569	54.2016	44.0607	8.39188	2.40792	36.7504	1.99613	2.83045
428	VAC 089D					Day11			5.595	28.302	22.8131	4.18094	13.0641	10.0915	69.2273	63.5236	NA	850.654	676.466	139.769	31.4294	477.267	28.1239	42.646	1.54166	8.56299	18.432	11.5778	66.3754	763.56	85.5994	477.267	35.385	5.05232	1.66945	1.34568	0.246621	0.770616	0.595266	4.08352	3.74707	NA	50.1777	39.9028	8.2446	1.85393	28.1526	1.65895	2.51556
429	VAC 089E					Day28			6.015	37.4452	9.45521	17.045	119.47	8.20237	49.7553	68.3041	10.8237	918.621	667.481	123.065	18.2709	653.673	155.325	99.9989	17.3161	3.91579	21.3152	63.836	42.961	793.051	70.6679	653.673	127.662	10.616	2.05456	0.518792	0.935233	6.5551	0.45005	2.72999	3.74773	0.593878	50.4032	36.6236	6.75237	1.00249	35.8659	8.5224	5.48677
430	VAC 090A	37	m	2019	non responder	Base line			5.595	67.9717	44.7325	42.1275	90.5747	43.8738	181.817	83.9698	113.294	909.164	480.323	NA	129.099	641.968	161.369	121.647	57.7898	31.7701	51.6106	67.2243	126.36	694.743	129.099	641.968	141.508	44.78	4.00946	2.63864	2.48498	5.34274	2.58799	10.7249	4.95314	6.68287	53.629	28.3328	NA	7.61516	37.8678	9.5187	7.17559
431	VAC 090B					Day3			8.085	60.275	17.5747	14.7305	17.8429	7.41609	194.781	171.022	125.195	1007.52	768.765	337.938	89.6385	854.35	44.8559	61.7341	0.163568	0	30.86	12.6295	163.666	888.142	213.788	854.35	53.295	0.0817839	2.46045	0.717405	0.601306	0.728354	0.302728	7.95102	6.98119	5.1105	41.1274	31.3813	13.7948	3.65908	34.8749	1.83104	2.52001
432	VAC 090C					Day7			6.27	24.6989	8.4493	22.1018	38.4519	16.2956	152.367	101.41	38.3155	755.73	407.747	314.739	104.577	550.285	83.2931	74.7898	0	2.9929	18.4167	27.3737	97.3641	581.739	209.658	550.285	79.0414	1.49645	1.30007	0.444745	1.16337	2.02398	0.857747	8.02012	5.33788	2.01681	39.7792	21.4625	16.5669	5.50459	28.9653	4.38428	3.9367
433	VAC 090D					Day11			5.625	37.3266	14.1837	8.27145	28.3865	23.7687	100.254	86.5699	NA	775.326	627.442	333.46	40.4605	613.437	50.6283	43.5689	0	10.2716	19.9272	26.0776	93.4121	701.384	186.96	613.437	47.0986	5.13581	2.19005	0.832192	0.485307	1.66551	1.39457	5.88218	5.07928	NA	45.4904	36.8136	19.565	2.37392	35.9919	2.97049	2.5563
434	VAC 090E					Day28			5.535	23.3261	6.52147	3.31335	31.567	0.160128	146.202	74.1616	133.175	674.875	433.797	193.186	55.7178	511.965	88.6595	37.0878	4.53046	0	11.0536	15.8636	117.846	554.336	124.452	511.965	62.8736	2.26523	1.39086	0.388853	0.197564	1.88223	0.00954791	8.71754	4.422	7.94078	40.2405	25.8658	11.519	3.32226	30.5267	5.28646	2.21142
435	VAC 091A	42	m	2019	non responder	Base line			4.635	42.26	2.66141	24.8393	0.20398	11.0738	118.865	40.1239	66.655	489.324	337.622	NA	45.4528	345.705	50.4898	43.7416	7.75952	0	23.2536	5.63887	75.2146	413.473	45.4528	345.705	47.1157	3.87976	3.00911	0.189504	1.76867	0.0145243	0.788502	8.46373	2.857	4.74614	34.8421	24.0402	NA	3.23645	24.6158	3.5951	3.1146
436	VAC 091B					Day3			7.665	25.2325	1.79239	19.7334	40.4562	11.976	213.716	78.8327	204.587	837.51	726.279	223.472	50.8988	786.403	56.7047	71.2095	14.9749	7.67266	15.5861	26.2161	165.712	781.894	137.185	786.403	63.9571	11.3238	1.08644	0.0771754	0.849665	1.74193	0.515654	9.20202	3.39431	8.80893	36.0608	31.2715	9.62207	2.19156	33.8603	2.44154	3.06608
437	VAC 091C					Day7			4.29	20.1989	7.40411	10.8265	4.28189	14.8373	137.502	32.5768	NA	448.386	288.678	150.254	62.0414	246.023	11.7667	20.2052	8.22229	7.46254	12.8099	9.55958	85.0393	368.532	106.148	246.023	15.9859	7.84242	1.55392	0.569604	0.832894	0.329409	1.14144	10.5781	2.50616	NA	34.4947	22.2082	11.5592	4.77289	18.9267	0.905218	1.5544
438	VAC 091D					Day11			4.62	22.3608	8.89992	1.66203	20.2752	8.22883	67.4881	48.0385	84.3887	580.94	378.458	155.526	35.8887	281.601	41.0115	75.9165	2.58115	6.70764	10.9743	14.252	66.6384	479.699	95.7074	281.601	58.464	4.6444	1.59736	0.635772	0.118728	1.44838	0.587832	4.82106	3.43166	6.02837	41.4998	27.0354	11.1101	2.56373	20.1164	2.92969	5.42315
439	VAC 091E					Day28			7.215	52.4743	31.8262	16.8208	65.5401	9.64816	113.808	45.5488	107.427	601.581	521.987	196.322	102.297	529.877	194.83	161.821	25.7236	17.3591	33.7071	37.5941	88.928	561.784	149.309	529.877	178.326	21.5414	2.40031	1.45581	0.769426	2.99798	0.441332	5.20587	2.08352	4.914	27.5179	23.8771	8.98026	4.67934	24.238	8.91205	7.40213
440	VAC 092A	61	m	2019	responder	Base line			10.98	65.2217	5.67987	26.2092	49.3908	9.56768	210.37	144.967	138.979	1822.56	1384.87	NA	120.944	1390.48	96.1348	57.187	10.782	15.1482	32.3702	29.4792	164.772	1603.72	120.944	1390.48	76.6609	12.9651	1.96041	0.170724	0.787786	1.48457	0.287582	6.32322	4.35736	4.17738	54.782	41.6261	NA	3.6353	41.7945	2.88959	1.71891
441	VAC 092B					Day3			7.395	102.128	90.002	51.9242	69.3622	29.38	137.367	95.1018	73.1294	920.488	906.537	326.649	102.877	866.101	131.32	73.9714	71.2303	35.1473	81.3513	49.3711	101.866	913.512	214.763	866.101	102.646	53.1888	4.55788	4.01672	2.31734	3.09558	1.31121	6.13056	4.24432	3.26371	41.0806	40.458	14.5781	4.59132	38.6534	5.86069	3.30128
442	VAC 092C					Day7			4.785	33.231	11.9201	6.26656	14.5023	9.66738	108.974	46.9782	37.7566	641.473	495.922	203.902	60.521	435.652	34.6198	45.7298	0.0340637	3.97096	17.1392	12.0849	64.5695	568.697	132.211	435.652	40.1748	2.00251	2.29202	0.82216	0.43222	1.00026	0.666783	7.51617	3.2402	2.60417	44.2439	34.2049	14.0636	4.17428	30.048	2.38781	3.1541
443	VAC 092D					Day11			4.68	25.1765	0.777221	2.75951	9.26824	8.35634	46.7743	56.5927	NA	703.136	574.932	186.431	69.5677	456.546	26.6414	35.3158	1.17393	9.70132	9.57108	8.81229	51.6835	639.034	128	456.546	30.9786	5.43763	1.77544	0.0548095	0.1946	0.653595	0.589288	3.29852	3.99091	NA	49.5851	40.5441	13.1471	4.90591	32.1956	1.87875	2.49047
444	VAC 092E					Day28			7.935	62.478	12.8821	4.14093	23.9849	9.80055	47.1667	85.7362	46.4066	1302.94	1041.72	350.252	80.1673	1050.67	59.2625	66.507	7.24797	0.270664	26.5003	16.8927	59.7699	1172.33	215.21	1050.67	62.8848	3.75932	2.59859	0.535794	0.17223	0.99758	0.407625	1.96176	3.56595	1.93015	54.1919	43.3274	14.5677	3.33432	43.6994	2.46485	2.76616
445	VAC 093A	43	m	2019	non responder	Base line			6.48	40.5655	1.58087	3.38649	14.7982	12.8829	57.106	27.726	28.2509	702.53	424.812	NA	188.091	431.19	29.0041	26.2348	0	23.1913	15.1776	13.8406	37.6943	563.671	188.091	431.19	27.6195	11.5956	2.06604	0.0805153	0.172477	0.753688	0.656139	2.90847	1.41211	1.43885	35.7806	21.6361	NA	9.57967	21.9609	1.47721	1.33617
446	VAC 093B					Day3			6.555	27.4416	6.53613	12.6681	5.72948	29.8155	68.2362	34.85	2.52372	658.204	524.986	366.829	146.898	472.368	29.576	23.3432	0.298477	0	15.5486	17.7725	35.2033	591.595	256.864	472.368	26.4596	0.149238	1.38164	0.329083	0.637818	0.288469	1.50116	3.43558	1.75464	0.127065	33.1394	26.4322	18.4692	7.39607	23.7829	1.4891	1.17529
447	VAC 093C					Day7			2.67	16.4361	4.74566	2.15074	9.89075	8.69903	19.1571	14.3369	NA	325.751	177.861	147.676	66.6205	208.794	41.3589	41.687	0	0	7.7775	9.29489	16.747	251.806	107.148	208.794	41.523	0	2.03163	0.586601	0.265848	1.22257	1.07527	2.36796	1.77215	NA	40.2654	21.985	18.254	8.23481	25.8085	5.11229	5.15284
448	VAC 093D					Day11			3.765	14.2542	0	2.01623	20.7941	6.5381	35.5355	12.4704	NA	224.166	120.746	202.767	113.942	243.203	31.9115	25.0392	2.42533	0.103277	5.42346	13.6661	24.0029	172.456	158.354	243.203	28.4753	1.2643	1.24949	0	0.176739	1.82277	0.573118	3.11498	1.09313	NA	19.65	10.5843	17.7742	9.98791	21.3187	2.7973	2.19489
449	VAC 093E					Day28			5.73	33.3291	4.08708	4.56728	30.0153	9.86373	41.0626	22.1311	11.2618	446.271	498.777	240.01	85.5273	394.595	38.2074	66.9067	5.40232	0	13.9945	19.9395	24.8185	472.524	162.768	394.595	52.5571	2.70116	1.91967	0.235405	0.263064	1.7288	0.568125	2.3651	1.27469	0.648649	25.704	28.7283	13.8239	4.92615	22.7277	2.20065	3.85365
450	VAC 094A	48	m	2019	responder	Base line	common cold		8.505	43.873	10.4432	3.12683	14.9931	8.50795	139.429	75.8141	15.8655	1529.08	1254.84	78.1579	76.5648	1085.76	82.0125	125.99	0	0	19.1477	11.7505	77.0362	1391.96	77.3613	1085.76	104.002	0	1.70247	0.405244	0.121335	0.5818	0.330147	5.41048	2.94194	0.615655	59.3354	48.6936	3.03288	2.97107	42.1324	3.18246	4.88901
451	VAC 094B					Day3	influenza by self report		4.32	143.203	65.9668	86.1148	134.507	41.8577	175.042	111.978	NA	842.821	544.846	74.5204	121.527	540.24	118.212	91.2872	133.547	132.9	98.4284	88.1821	143.51	693.834	98.0235	540.24	104.749	133.223	10.9402	5.03963	6.57887	10.2758	3.19778	13.3726	8.55476	NA	64.3886	41.6244	5.6931	9.28422	41.2725	9.03096	6.97403
452	VAC 094C					Day7			4.38	38.0801	10.7827	5.77491	41.0308	20.4652	84.834	65.1642	156.557	656.271	474.926	78.1019	54.3519	416.278	75.6694	46.2051	2.04387	0.800084	18.2126	30.748	102.185	565.599	66.2269	416.278	60.9373	1.42198	2.86934	0.812474	0.435139	3.09167	1.54205	6.39224	4.91012	11.7965	49.45	35.7857	5.88498	4.09542	31.3665	5.70169	3.48156
453	VAC 094D					Day11			6.225	37.4076	14.2381	8.90197	20.5256	20.1239	99.7572	72.619	NA	1102.75	791.812	224.562	70.3156	631.395	112.285	96.7797	0.390593	20.5274	20.1826	20.3247	86.1881	947.279	147.439	631.395	104.532	10.459	1.98325	0.754867	0.471959	1.08821	1.06692	5.28886	3.85007	NA	58.4647	41.9798	11.9057	3.72795	33.4749	5.95304	5.131
454	VAC 094E					Day28	common cold		7.38	539.89	536.492	418.719	611.079	242.461	748.771	579.778	312.31	1323.79	878.778	337.764	387.598	1265.73	553.654	538.949	648.261	890.202	498.367	426.77	546.953	1101.28	362.681	1265.73	546.301	769.232	24.1438	23.9919	18.7251	27.3274	10.8428	33.485	25.9276	13.9665	59.1997	39.2989	15.1048	17.3333	56.6034	24.7593	24.1017
455	VAC 095A	36	m	2019	responder	Base line			7.455	65.9489	3.17524	28.5285	41.6064	23.389	104.92	63.6874	116.918	892.602	592.864	214.181	161.772	560.987	38.9316	51.0934	11.3984	14.9693	32.5509	32.4977	95.1752	742.733	187.976	560.987	45.0125	13.1838	2.91956	0.140568	1.26296	1.84191	1.03543	4.6448	2.81944	5.17598	39.5155	26.2461	9.4818	7.16164	24.8349	1.7235	2.2619
456	VAC 095B					Day3			3.105	35.6352	11.368	9.82985	4.5549	7.1203	14.9018	11.8049	NA	367.936	223.482	121.027	50.8901	199.351	19.9864	33.2003	5.51545	0	18.9444	5.8376	13.3534	295.709	85.9587	199.351	26.5933	2.75772	3.7877	1.20831	1.04482	0.484144	0.756822	1.58392	1.25475	NA	39.1082	23.754	12.8641	5.40915	21.1892	2.12437	3.52888
457	VAC 095C					Day7			4.74	31.9038	26.1621	3.94074	25.7538	15.1169	76.592	4.13721	NA	496.168	432.036	211.817	128.907	291.043	34.021	58.1654	8.22438	0	20.6689	20.4354	40.3646	464.102	170.362	291.043	46.0932	4.11219	2.22137	1.82159	0.274383	1.79317	1.05255	5.33289	0.288062	NA	34.5468	30.0815	14.7482	8.97547	20.2645	2.36879	4.0499
458	VAC 095D					Day11			3.57	34.0489	6.17778	2.93574	38.3481	7.04616	44.1091	23.8402	6.43875	442.149	298.584	113.003	64.206	306.695	65.5221	51.3627	0.0514659	0	14.3875	22.6971	24.796	370.367	88.6045	306.695	58.4424	0.0257329	3.14769	0.571113	0.271398	3.54514	0.65139	4.07772	2.20394	0.595238	40.875	27.603	10.4467	5.9356	28.3528	6.05727	4.74828
459	VAC 095E					Day28			4.545	43.7805	27.0684	10.3684	48.0006	4.38375	61.0384	19.7571	6.24551	289.096	165.602	158.849	95.3756	265.973	20.9635	22.5546	0	0	27.0724	26.1922	29.0137	227.349	127.112	265.973	21.7591	0	3.1791	1.96556	0.752896	3.48554	0.318324	4.43227	1.43465	0.453515	20.9926	12.0251	11.5347	6.92565	19.3135	1.52226	1.63779
460	VAC 096A	69	m	2019	responder	Base line			4.83	27.0693	13.508	14.4218	7.06784	0.271298	16.8687	20.5444	NA	497.317	315.644	112.03	38.3433	319.492	20.1908	23.249	0	5.41339	18.333	3.66957	18.7065	406.481	75.1867	319.492	21.7199	2.7067	1.84964	0.922998	0.985441	0.482944	0.0185377	1.15264	1.40379	NA	33.9816	21.5679	7.65499	2.61999	21.8309	1.37963	1.5886
461	VAC 096B					Day3			12.12	68.1352	16.7618	23.2129	31.1985	0.153816	102.98	63.61	NA	1041.51	506.966	273.069	101.633	623.004	60.095	60.2218	11.4497	31.0113	36.0366	15.6762	83.2952	774.236	187.351	623.004	60.1584	21.2305	1.85535	0.456432	0.632096	0.84955	0.00418848	2.8042	1.73213	NA	28.3607	13.8049	7.43579	2.7675	16.9647	1.63641	1.63987
462	VAC 096C					Day7			6.045	26.3023	5.72614	13.8945	31.5313	27.0845	22.1378	11.8579	74.7978	629.06	322.252	180.923	100.778	397.978	45.0825	65.0901	3.72717	0.532246	15.3076	29.3079	36.2645	475.656	140.851	397.978	55.0863	2.12971	1.436	0.312624	0.758583	1.72148	1.47871	1.20864	0.647396	4.08367	34.3442	17.5937	9.87768	5.5021	21.728	2.46133	3.55366
463	VAC 096D					Day11			7.185	51.0573	21.4137	16.2696	82.9837	13.2548	60.5355	34.5915	28.6112	578.967	289.064	180.22	86.6071	401.905	125.091	145.662	5.41735	24.6867	29.5802	48.1193	41.2461	434.016	133.413	401.905	135.376	15.052	2.34525	0.983607	0.74732	3.81174	0.608841	2.78061	1.58891	1.31422	26.594	13.2778	8.27815	3.97818	18.4609	5.74586	6.69077
464	VAC 096E					Day28			7.29	102.221	NA	33.6765	57.6854	19.4982	43.8584	72.1109	NA	NA	NA	NA	NA	487.865	104.438	NA	34.5136	NA	67.9489	38.5918	57.9847	NA	NA	487.865	104.438	34.5136	4.62777	NA	1.5246	2.61153	0.882724	1.98556	3.2646	NA	NA	NA	NA	NA	22.0866	4.72813	NA
[truncated: 51 more columns]

## Sheet: EoE cohort Fig 4
related to figure 4
	sample type									cfDNA	cfDNA	cfDNA	cfDNA	cfDNA	cfDNA	cfDNA	cfDNA	cfDNA	cfDNA	cfDNA	cfDNA	cfDNA	cfDNA	cfDNA	cfDNA	cfDNA	cfDNA	cfDNA	cfDNA	cfDNA	cfDNA	cfDNA	cfDNA	cfDNA	cfDNA	cfDNA	cfDNA	cfDNA	cfDNA	cfDNA	cfDNA	cfDNA	cfDNA	cfDNA	cfDNA	cfDNA	cfDNA	cfDNA	cfDNA
	units								ng/ml	GE/ml	GE/ml	GE/ml	GE/ml	GE/ml	GE/ml	GE/ml	GE/ml	GE/ml	GE/ml	GE/ml	GE/ml	GE/ml	GE/ml	GE/ml	GE/ml	GE/ml	GE/ml	GE/ml	GE/ml	GE/ml	GE/ml	GE/ml	GE/ml	GE/ml	GE/ml	%	%	%	%	%	%	%	%	%	%	%	%	%	%
	cell type								total cfDNA	B cells	B cells	B cells	CD8	CD8	Eosinophils	Eosinophils	Eosinophils	Granulocytes	Granulocytes	Monocytes	Monocytes	Neutrophils	T cell	T cell	Tregs	Tregs	B cells	CD8	Eosinophils	Granulocytes	Monocytes	Neutrophils	T cell	Tregs	Neut+gran	B cells	B cells	B cells	CD8	CD8	Eosinophils	Eosinophils	Eosinophils	Granulocytes	Granulocytes	Monocytes	Monocytes	Neutrophils	T cell
sample ID	age	Gender	diagnosis	CollectDate	PPI	H1Block	H2Block	Current Treatment	NA	BCELL3	BCELL1	BCELL2	CD8A	CD8B	EOSI3	EOSI2	EOSI1	NEUT2	NEUT1	MONO1	MONO2	NEUT3	TCELL1	TCELL2	TREG1	TREG2	average	average	average	average	average	average	average	average	average	BCELL3	BCELL1	BCELL2	CD8A	CD8B	EOSI3	EOSI2	EOSI1	NEUT2	NEUT1	MONO1	MONO2	NEUT3	TCELL1
12577	4.91	m	Active EoE	NA	Prevacid	None	None	Food Trial	6.42857	78.9469	26.9911	41.4186	0	9.46029	70.3351	58.4957	NA	510.493	429.845	NA	105.538	489.068	18.7836	45.887	0	0	49.1188	4.73015	64.4154	470.169	105.538	489.068	32.3353	0	479.619	4.05301	1.38568	2.12637	0	0.485677	3.6109	3.00308	NA	26.2079	22.0676	NA	5.41814	25.108	0.96432
11T97	10.4	m	Active EoE	NA	None	None	None	Elimination	7.35	68.7749	97.6562	18.4881	16.1164	7.62315	149.179	94.9917	NA	279.894	332.04	NA	27.9089	297.937	26.5074	15.7947	0	0	61.6397	11.8698	122.086	305.967	27.9089	297.937	21.151	0	301.952	3.08816	4.385	0.830161	0.723667	0.342298	6.69852	4.26536	NA	12.5679	14.9094	NA	1.25318	13.3781	1.19025
11WY4	NA	NA	Active EoE	NA	NA	NA	NA	NA	3.024	26.3963	NA	4.97974	8.83735	2.1692	36.9796	34.6308	NA	290.66	NA	60.8819	37.0318	255.635	16.1725	34.2823	2.20966	1.52458	15.688	5.50327	35.8052	290.66	48.9568	255.635	25.2274	1.86712	273.148	2.88084	NA	0.543478	0.964489	0.236742	4.03587	3.77953	NA	31.7221	NA	6.64452	4.04157	27.8995	1.76503
123GG	14.27	f	Control	04/19/2018	None	None	None	Ad Lib	1.58	45.2534	0	14.5136	9.13033	3.8178	42.2966	31.6114	NA	248.909	210.711	45.5108	48.0182	132.349	13.801	38.1297	2.72636	4.10549	19.9224	6.47406	36.954	229.81	46.7645	132.349	25.9653	3.41593	181.08	9.45261	0	3.03163	1.90716	0.797468	8.83498	6.60304	NA	51.9926	44.0137	9.50637	10.0301	27.6454	2.88277
123J6	9.66	m	Remission EoE	07/16/2018	None	None	None	Elemental + Food Trial	2.11034	21.5958	25.0369	3.76236	10.9473	6.56969	2.94331	11.0812	0	198.286	211.418	56.2045	18.745	143.875	24.4615	31.6875	0.70779	0.536811	16.7983	8.75848	4.67482	204.852	37.4748	143.875	28.0745	0.622301	174.364	3.37732	3.91548	0.588388	1.71202	1.02742	0.460299	1.73296	0	31.0095	33.0633	8.78972	2.93149	22.5004	3.82549
123R4	3.11	m	Remission EoE	10/22/2019	Nexium	None	None	Elemental + Food Trial	2.4	42.5418	30.2693	0.0347212	0	4.41494	22.3247	27.8749	14.9371	226.802	172.188	131.483	61.5267	218.711	18.0177	0	11.3548	0.316808	24.2819	2.20747	21.7122	199.495	96.5051	218.711	9.00885	5.83582	209.103	5.85008	4.16245	0.00477464	0	0.607115	3.06995	3.83318	2.05405	31.1883	23.6782	18.0808	8.46077	30.0758	2.47768
123TT	13.2	m	Remission EoE	10/15/2019	Prevacid	None	None	Elimination	7.62	71.9145	0	19.9638	20.6934	0	58.7571	52.4596	20.2805	526.832	570.074	286.399	180.263	443.755	39.818	21.6964	33.7508	0	30.6261	10.3467	43.8324	548.453	233.331	443.755	30.7572	16.8754	496.104	3.11472	0	0.86466	0.89626	0	2.54485	2.2721	0.878378	22.8178	24.6907	12.4044	7.80744	19.2197	1.72458
123YA	15.28	m	Remission EoE	10/14/2019	Prilosec	Zyrtec	None	Elimination	2.385	13.9275	6.21093	2.87178	6.58326	2.61982	31.8585	13.8916	28.9452	158.412	102.66	90.0832	50.4373	162.932	5.77692	21.5536	2.65067	2.2095	7.67008	4.60154	24.8984	130.536	70.2602	162.932	13.6652	2.43009	146.734	1.92727	0.85946	0.397393	0.910983	0.362527	4.40854	1.9223	4.0054	21.9209	14.2059	12.4656	6.97944	22.5463	0.799402
1254J	5.68	f	Active EoE	NA	Prilosec	None	None	Elimination	5.7	70.3559	35.2469	14.6408	16.3158	5.34761	194.697	66.7526	NA	323.466	528.082	NA	55.2137	223.132	31.3432	74.1965	0	0	40.0812	10.8317	130.725	425.774	55.2137	223.132	52.7699	0	324.453	4.07364	2.04082	0.847709	0.944693	0.309629	11.273	3.86501	NA	18.7289	30.5762	NA	3.1969	12.9195	1.81479
1258T	6.8	m	Active EoE	NA	Nexium	None	None	Elemental + Food Trial	35.1	460.082	101.49	42.4407	103.581	88.9253	553.764	365.7	NA	1716.9	3549.4	NA	986.097	1006.18	252.84	100.123	0	0	201.338	96.253	459.732	2633.15	986.097	1006.18	176.482	0	1819.66	4.32599	0.954274	0.399055	0.973933	0.836133	5.20685	3.43855	NA	16.1434	33.3738	NA	9.27192	9.46076	2.37737
126R1	12.17	m	Non-EoE, with Eos	03/05/2018	None	None	None	Ad Lib	2.088	23.7887	14.9139	8.4368	29.4685	0	26.8556	13.3256	NA	188.427	84.5075	118.715	40.6472	129.154	40.042	29.436	13.994	4.87982	15.7132	14.7343	20.0906	136.467	79.6813	129.154	34.739	9.43689	132.811	3.76009	2.35732	1.33354	4.65785	0	4.24485	2.10626	NA	29.7832	13.3574	18.7644	6.42477	20.4143	6.32911
129R8	16.25	f	Control	NA	Prilosec	None	None	Ad Lib	4.95	17.7764	0	0	11.2296	0	25.3347	28.4394	NA	151.281	186.556	NA	97.3707	220.647	5.00389	5.756	0.0908725	0	5.92548	5.61481	26.8871	168.918	97.3707	220.647	5.37995	0.0454362	194.783	1.18521	0	0	0.748716	0	1.68915	1.89615	NA	10.0864	12.4383	NA	6.49203	14.7113	0.333626
129W1	11.67	f	Control	03/22/2019	None	Zyrtec	None	Ad Lib	0.969231	NA	NA	NA	NA	NA	NA	NA	NA	NA	NA	NA	NA	NA	NA	NA	NA	NA	NA	NA	NA	NA	NA	NA	NA	NA	#DIV/0!	NA	NA	NA	NA	NA	NA	NA	NA	NA	NA	NA	NA	NA	NA
12A00	6.97	m	Active EoE	NA	None	Claritin	None	Elimination	6.32432	67.4847	17.0857	3.75273	0	23.7409	76.8727	19.9006	NA	552.591	406.16	NA	105.781	234.911	26.1065	117.075	0	0	29.441	11.8705	48.3867	479.375	105.781	234.911	71.5908	0	357.143	3.52167	0.891613	0.195835	0	1.23891	4.01158	1.03851	NA	28.8368	21.1953	NA	5.52013	12.2588	1.36236
12A19	9.14	m	Remission EoE	11/19/2018	Prilosec	Claritin	None	Elemental + Food Trial	3.06857	41.6006	6.25376	2.36746	7.05195	5.50223	68.786	21.9352	17.3886	137.604	143.111	103.481	26.1148	123.892	18.3169	32.731	4.25981	5.39105	16.7406	6.27709	36.0366	140.358	64.7977	123.892	25.524	4.82543	132.125	4.47426	0.672608	0.254626	0.758456	0.59178	7.39812	2.35919	1.87019	14.7997	15.392	11.1296	2.80872	13.3249	1.97003
12A2L	5.32	m	Active EoE	NA	Prilosec	None	None	Elimination	5.28	61.7371	0	0.168404	0	12.7065	76.3512	88.2278	NA	391.21	NA	NA	141.289	346.838	0.363435	13.4172	0	0	20.6352	6.35324	82.2895	391.21	141.289	346.838	6.89031	0	369.024	3.85895	0	0.0105263	0	0.794234	4.77243	5.51479	NA	24.453	NA	NA	8.83147	21.6796	0.0227169
12A61	11.2	f	Control	NA	Protonix	None	None	Ad Lib	15	212.586	115.188	53.8314	100.853	80.8788	188.429	49.1973	NA	1074.89	1216.23	NA	301.417	591.193	204.397	313.566	0.157082	0	127.202	90.8661	118.813	1145.56	301.417	591.193	258.981	0.0785408	868.376	4.67736	2.5344	1.18441	2.21899	1.77951	4.14586	1.08245	NA	23.6499	26.7597	NA	6.63185	13.0076	4.49718
12A63	6.04	m	Remission EoE	12/10/2018	None	None	None	Elimination	4.18	46.3756	0	11.0814	2.49353	7.94802	86.4129	36.5021	236.174	470.672	550.822	126.156	52.06	458.678	60.3688	83.6513	0	0	19.1523	5.22077	119.696	510.747	89.1081	458.678	72.01	0	484.713	3.6616	0	0.874933	0.196877	0.627538	6.82275	2.88203	18.6472	37.162	43.4903	9.9607	4.11041	36.2151	4.76643
12AH0	12.19	f	Control	NA	Prevacid	None	Zantac	Elimination	10.11	72.6816	27.5283	12.4572	22.5421	0	87.9699	29.0715	12.1272	465.922	580.444	NA	293.222	414.946	73.8477	53.4713	0.10957	0.239243	37.5557	11.2711	43.0562	523.183	293.222	414.946	63.6595	0.174407	469.065	2.37263	0.898639	0.406654	0.735871	0	2.87171	0.949015	0.395883	15.2097	18.9481	NA	9.572	13.5456	2.4107
12AJL	18.17	m	Remission EoE	03/22/2018	Prilosec	None	None	Food Trial	3.528	35.3771	33.429	13.0808	12.6899	10.4487	33.1877	20.251	NA	349.153	382.751	217.561	64.8737	233.27	63.108	38.5295	23.5469	8.58338	27.2956	11.5693	26.7193	365.952	141.217	233.27	50.8187	16.0651	299.611	3.30942	3.12717	1.22366	1.1871	0.977444	3.1046	1.89442	NA	32.6621	35.8051	20.3521	6.06873	21.8216	5.90355
12J7L	7.29	m	Active EoE	11/11/2019	Nexium	None	None	Ad Lib	3.82105	47.9726	5.00661	5.07536	5.1203	3.48073	92.1968	42.625	NA	413.768	NA	11.8141	7.04791	254.924	26.0312	45.2763	0	0	19.3515	4.30052	67.4109	413.768	9.43099	254.924	35.6537	0	334.346	4.14351	0.432432	0.43837	0.442252	0.300639	7.96325	3.68162	NA	35.7381	NA	1.02041	0.608744	22.0183	2.24838
12J7W	8.56	m	Active EoE	11/11/2019	Prilosec	Zyrtec	None	Elemental + Food Trial	1.83	37.6049	2.06079	6.09716	6.9799	0	45.8484	8.46322	0.77227	112.575	52.7779	29.0086	49.2725	77.5853	4.33152	8.55435	0	0	15.2543	3.48995	18.3613	82.6767	39.1406	77.5853	6.44293	0	80.131	6.78189	0.371655	1.0996	1.2588	0	8.26858	1.52631	0.139276	20.3025	9.51828	5.23159	8.88609	13.9922	0.781172
12J87	10.66	m	Remission EoE	11/04/2019	Protonix	None	None	Ad Lib	6.54	58.547	9.11308	42.9768	36.942	11.0911	87.8388	49.7835	137.606	650.424	494.318	55.6944	74.585	515.015	39.9118	66.4118	35.3608	8.83976	36.879	24.0166	91.7429	572.371	65.1397	515.015	53.1618	22.1003	543.693	2.9545	0.45988	2.16877	1.86423	0.5597	4.43267	2.51226	6.94414	32.8229	24.9451	2.81055	3.76384	25.9896	2.0141
12J8G	4.16	m	Active EoE	11/04/2019	None	Zyrtec	None	Elimination	3.24	27.5799	3.55267	11.52	6.11073	3.47819	30.9918	22.1519	NA	208.059	NA	77.9437	50.0703	190.632	27.2945	26.1035	4.01795	3.58292	14.2175	4.79446	26.5718	208.059	64.007	190.632	26.699	3.80044	199.345	2.80934	0.361882	1.17345	0.622451	0.354296	3.15689	2.25644	NA	21.1933	NA	7.93951	5.10026	19.4182	2.78027
12J8N	9.77	m	Remission EoE	10/29/2019	Prilosec	None	None	Elimination	1.56	16.35	7.79762	5.72583	5.928	3.52121	20.0472	15.7535	56.9973	65.5715	100.724	73.6807	8.95198	56.8649	24.5682	26.1686	6.87734	9.06469	9.95781	4.72461	30.9327	83.1478	41.3163	56.8649	25.3684	7.97102	70.0064	3.459	1.64966	1.21135	1.25413	0.744946	4.24118	3.3328	12.0583	13.8723	21.3092	15.5879	1.89388	12.0303	5.19764
12J8T	12.67	m	Active EoE	10/29/2019	None	None	None	Ad Lib	2.65385	38.2412	12.1065	18.5179	0.06729	6.24221	158.926	30.2397	36.5821	162.486	184.747	36.7896	45.9332	122.127	29.1076	0.296667	4.37255	0	22.9552	3.15475	75.2494	173.617	41.3614	122.127	14.7021	2.18627	147.872	4.75569	1.50556	2.30289	0.0083682	0.776283	19.7641	3.76062	4.54936	20.2068	22.9752	4.57516	5.71226	15.1878	3.61983
12J91	13.72	m	Remission EoE	10/28/2019	None	None	None	Elemental + Food Trial	4.04348	18.5589	0.0966378	12.345	0	0	50.0631	14.3128	7.99896	47.3562	111.503	58.7783	63.8208	165.139	57.9275	19.1195	0.0888065	0	10.3335	0	24.125	79.4294	61.2996	165.139	38.5235	0.0444032	122.284	1.5148	0.00788768	1.00761	0	0	4.08621	1.16822	0.652884	3.86526	9.10097	4.79755	5.20912	13.4788	4.7281
12J9C	18.71	m	Remission EoE	10/28/2019	Aciphex	Zyrtec	None	Food Trial	2.38	7.08382	0	4.35126	0.0205726	0.00951209	0.186713	13.4892	0.241588	89.7659	141.206	23.1085	21.8854	85.2109	8.67872	9.78443	0	0	3.81169	0.0150423	4.63918	115.486	22.4969	85.2109	9.23157	0	100.349	0.982309	0	0.603387	0.00285278	0.00131903	0.0258913	1.87054	0.0335008	12.4478	19.581	3.20444	3.03483	11.8161	1.20347
12JAY	5.61	m	Remission EoE	12/02/2019	None	Zyrtec	None	Elemental + Food Trial	3.22105	114.234	0	42.1658	23.6619	13.9347	36.6094	38.0512	0	234.654	331.034	280.057	124.699	254.327	58.4574	7.44703	0.974858	96.2033	52.1332	18.7983	24.8868	282.844	202.378	254.327	32.9522	48.5891	268.585	11.7045	0	4.32036	2.42443	1.42777	3.75104	3.89877	0	24.0429	33.9181	28.695	12.7769	26.0586	5.98962
12JLN	7.25	m	Active EoE	11/27/2019	Nexium	None	None	Ad Lib	2.4	34.5901	26.816	7.54336	2.99394	4.07648	65.3676	33.4948	43.9422	257.706	49.4374	107.379	24.1473	148.924	18.43	2.21336	0	11.3732	22.9832	3.53521	47.6015	153.572	65.7632	148.924	10.3217	5.68658	151.248	4.75661	3.68757	1.03732	0.411708	0.560572	8.98894	4.606	6.04265	35.4382	6.79833	14.7661	3.32059	20.4791	2.53437
12JP6	17.61	m	Remission EoE	11/21/2019	Prilosec	None	None	Ad Lib	3.225	38.7975	NA	6.10083	0	0	36.1659	17.1779	NA	209.316	NA	169.545	61.8877	226.575	1.04288	40.517	0	12.6087	22.4492	0	26.6719	209.316	115.716	226.575	20.7799	6.30435	217.945	3.97037	NA	0.624334	0	0	3.70107	1.75791	NA	21.4205	NA	17.3505	6.33333	23.1867	0.106724
12JPN	11.56	m	Active EoE	11/25/2019	Prilosec	None	None	Elimination	3.89143	94.9646	31.6646	30.7309	21.0162	8.97066	137.379	44.9904	31.8676	221.718	238.393	48.9194	55.0196	250.043	35.6206	12.0035	6.68082	0	52.4534	14.9934	71.4123	230.056	51.9695	250.043	23.8121	3.34041	240.049	8.05397	2.68548	2.6063	1.78239	0.760804	11.6511	3.81565	2.7027	18.8039	20.2182	4.14886	4.66623	21.2062	3.02099
12JPW	16	m	Control	11/21/2019	Prevacid	None	None	Ad Lib	3.45714	25.2128	0	0	16.7554	6.39233	69.2214	48.3468	NA	343.032	NA	119.349	94.6504	286.874	24.6926	26.9116	15.3054	0	8.40426	11.5739	58.7841	343.032	107	286.874	25.8021	7.65272	314.953	2.40691	0	0	1.59954	0.610238	6.60816	4.61538	NA	32.7473	NA	11.3935	9.03571	27.3861	2.35726
12JR8	7.93	m	Remission EoE	11/25/2019	None	Zyrtec	Zantac	Elimination	3.576	15.4991	NA	0	14.3107	0	148.824	69.6762	NA	406.204	NA	105.985	27.7067	262.415	43.576	44.5125	0	15.667	7.74955	7.15537	109.25	406.204	66.8459	262.415	44.0442	7.83349	334.31	1.43043	NA	0	1.32075	0	13.7352	6.4305	NA	37.489	NA	9.78148	2.55708	24.2186	4.02168
12JTC	2.57	NA	Active EoE	11/19/2019	Nexium	Zyrtec	None	Elemental + Food Trial	4.95	141.529	84.4646	43.9303	24.7308	82.7065	34.0575	38.6211	NA	228.07	NA	111.714	120.114	102.887	59.9294	92.0342	6.88005	0	89.9745	53.7186	36.3393	228.07	115.914	102.887	75.9818	3.44002	165.478	9.43619	5.63154	2.92898	1.64888	5.51432	2.27073	2.575	NA	15.2062	NA	7.44833	8.00843	6.85981	3.99569
12JWH	8.11	NA	Remission EoE	11/18/2019	Prevacid	None	None	Elimination	3.8	21.8816	10.1099	7.81552	0.302841	0.235725	27.0371	59.8468	NA	390.977	NA	176.04	69.7327	369.267	3.7266	25.4637	0	0	13.269	0.269283	43.4419	390.977	122.887	369.267	14.5951	0	380.122	1.90043	0.878049	0.678784	0.0263019	0.0204729	2.34819	5.19774	NA	33.9567	NA	15.2893	6.05634	32.0712	0.323658
12JWL	12.23	NA	Remission EoE	11/18/2019	None	None	None	Elimination	2.06897	21.9142	4.48074	3.53897	0.551603	8.90775	44.6082	13.8103	NA	124.982	104.983	125.643	49.5026	79.983	6.76634	22.2996	10.88	0	9.97796	4.72968	29.2093	114.982	87.5727	79.983	14.533	5.44001	97.4826	3.49566	0.71475	0.564521	0.0879894	1.42093	7.11573	2.20296	NA	19.9366	16.7464	20.042	7.89646	12.7586	1.07934
12JWW	13.15	NA	Active EoE	11/18/2019	Nexium	None	None	Elimination	5.13	46.986	35.4218	23.6745	0.368776	6.79296	39.5684	23.7712	NA	423.499	NA	672.331	246.969	191.523	20.1768	10.139	0	0	35.3608	3.58087	31.6698	423.499	459.65	191.523	15.1579	0	307.511	3.02279	2.27882	1.52308	0.0237248	0.437018	2.54559	1.52929	NA	27.2453	NA	43.2537	15.8885	12.3214	1.29805
12L0A	16.52	f	Chronic esophagitis	09/30/2019	Prilosec	None	Zantac	Elimination	1.785	4.61873	0	5.67713	2.28906	4.3501	26.5347	4.62449	4.55457	80.0491	81.1025	23.9124	25.2942	91.3478	5.65331	10.257	4.0259	2.06456	3.43195	3.31958	11.9046	80.5758	24.6033	91.3478	7.95515	3.04523	85.9618	0.853968	0	1.04966	0.423231	0.8043	4.90607	0.855034	0.842105	14.8005	14.9952	4.42123	4.67671	16.8895	1.04525
12L2A	3.2	f	Remission EoE	09/16/2019	Prilosec	None	None	Food Trial	2.36471	39.2222	0	0.115097	11.6553	5.17292	51.7165	30.4367	5.95228	374.413	129.489	39.2274	19.5016	178.685	47.1138	33.2684	5.01953	7.41831	13.1124	8.41413	29.3685	251.951	29.3645	178.685	40.1911	6.21892	215.318	5.47409	0	0.0160637	1.62669	0.721965	7.21788	4.24793	0.830737	52.2555	18.0723	5.47483	2.72177	24.9384	6.5755
12L4J	16.9	f	Control	09/05/2019	None	Zyrtec	None	Ad Lib	0.927273	14.0178	2.66621	0.147902	7.63261	0.538416	10.3472	5.18746	0.633514	135.826	80.6492	31.1709	13.6692	82.5605	7.02676	12.4435	0	0	5.61062	4.08551	5.3894	108.237	22.4201	82.5605	9.73514	0	95.399	4.98917	0.948953	0.0526408	2.71658	0.191632	3.68277	1.84631	0.225479	48.3428	28.7045	11.0943	4.86513	29.3848	2.50095
12L4M	15.49	f	Control	08/30/2019	None	None	None	Ad Lib	2.8875	30.9754	16.6537	11.4015	0	7.30406	37.4707	24.3838	NA	345.142	167.073	108.107	53.6465	247.47	17.0948	17.5073	0	0	19.6769	3.65203	30.9273	256.107	80.8769	247.47	17.3011	0	251.789	3.5404	1.90347	1.30316	0	0.834833	4.28279	2.787	NA	39.4488	19.0959	12.3564	6.13164	28.2851	1.95389
12L55	7.32	m	Control	08/29/2019	None	Claritin	None	Ad Lib	2.31111	57.2919	7.41436	11.1265	13.902	8.41398	27.5715	19.9231	NA	141.155	102.893	97.9985	49.4545	120.627	0	6.61094	6.08563	0	25.2776	11.158	23.7473	122.024	73.7265	120.627	3.30547	3.04281	121.325	8.18145	1.05879	1.5889	1.98525	1.20154	3.93728	2.84507	NA	20.1573	14.6934	13.9945	7.06223	17.2259	0
12L95	10.02	m	Control	NA	None	None	None	Ad Lib	6.3	62.7597	8.79484	52.6433	0	0	46.9947	42.7604	NA	571.572	648.942	NA	126.255	585.671	22.7389	73.1975	0	0	41.3993	0	44.8776	610.257	126.255	585.671	47.9682	0	597.964	3.28774	0.460728	2.75778	0	0	2.46187	2.24006	NA	29.9425	33.9956	NA	6.61401	30.6811	1.19121
12L9J	10.39	f	Chronic esophagitis	NA	None	None	None	Ad Lib	10.4	55.977	13.0111	14.1015	0	7.4789	356.211	75.1806	NA	435.812	615.863	NA	272.008	369.878	26.3564	33.2617	0.357702	0	27.6966	3.73945	215.696	525.837	272.008	369.878	29.809	0.178851	447.858	1.77637	0.412895	0.447495	0	0.237335	11.304	2.38578	NA	13.83	19.5438	NA	8.63188	11.7377	0.836393
12LC7	14.65	m	Remission EoE	11/19/2018	Prilosec	None	None	Elemental + Food Trial	3.22	25.3605	0	7.73945	6.92673	7.1511	25.5334	20.0579	2.7561	260.502	94.636	112.371	65.5906	269.667	31.9245	22.705	0.0295198	0	11.0333	7.03891	16.1158	177.569	88.9809	269.667	27.3147	0.0147599	223.618	2.59932	0	0.793253	0.709953	0.73295	2.61704	2.05582	0.282486	26.7001	9.69969	11.5174	6.72269	27.6395	3.27209
12LGM	12.92	NA	Remission EoE	12/20/2018	Prilosec	None	None	Elimination	2.94	40.7832	0.541861	2.06796	0	0.0224337	30.7952	18.3593	3.46174	254.56	183.323	95.4268	39.3892	193.906	3.04351	16.6175	1.04819	0	14.4644	0.0112169	17.5387	218.942	67.408	193.906	9.83048	0.524096	206.424	4.57817	0.0608273	0.232142	0	0.00251832	3.45695	2.06095	0.388601	28.576	20.5792	10.7122	4.42168	21.7671	0.341652
12LHL	15.8	f	Control	NA	Prilosec	None	None	Ad Lib	6.15	28.6756	0	60.6743	0	0	15.7821	0	NA	243.004	313.149	NA	141.822	363.365	49.3281	52.6646	0	0	29.7833	0	7.89106	278.077	141.822	363.365	50.9964	0	320.721	1.53884	0	3.25602	0	0	0.84693	0	NA	13.0406	16.8048	NA	7.61073	19.4996	2.64714
12LJ2	4.74	m	Inactive/Intermediate EoE	01/17/2019	None	Claritin	None	Elimination	2.6	20.2711	6.29096	16.2745	12.2655	0	96.8053	34.2992	NA	183.527	52.946	45.0773	53.907	97.9457	15.2987	21.9302	0	18.2914	14.2789	6.13277	65.5523	118.237	49.4921	97.9457	18.6145	9.14569	108.091	2.57313	0.798548	2.06582	1.55694	0	12.2881	4.35379	NA	23.2962	6.72074	5.72193	6.84272	12.4328	1.94196
12LT7	7.1	m	Active EoE	NA	None	None	None	Elimination	11.9351	84.7312	57.3794	32.0643	17.2847	9.17242	207.185	77.2663	NA	1256	1227.59	NA	142.944	1158.63	50.1555	29.6229	15.9155	0	58.0583	13.2286	142.226	1241.8	142.944	1158.63	39.8892	7.95773	1200.22	2.34301	1.58667	0.88665	0.477961	0.253638	5.72912	2.13659	NA	34.7312	33.9457	NA	3.95273	32.0388	1.38691
12M0A	13.31	f	Control	NA	None	None	None	Ad Lib	6.9	107.593	5.93574	21.0203	18.7142	20.8921	111.825	59.5223	NA	365.18	624.883	NA	107.688	304.891	24.975	77.3494	13.1557	2.84883	44.8496	19.8032	85.6736	495.032	107.688	304.891	51.1622	8.00224	399.961	5.14625	0.283912	1.00542	0.895118	0.999289	5.34868	2.847	NA	17.4669	29.8887	NA	5.1508	14.5832	1.19458
12N0L	5.8	f	Remission EoE	12/28/2018	None	None	None	Ad Lib	3.52941	30.6894	0	13.3718	5.94283	5.44562	61.442	24.39	NA	229.516	248.586	106.29	51.3981	231.825	34.156	22.7998	3.81338	5.48832	14.687	5.69422	42.916	239.051	78.8439	231.825	28.4779	4.65085	235.438	2.86974	0	1.25038	0.55571	0.509216	5.74541	2.28069	NA	21.4619	23.2451	9.93908	4.8062	21.6778	3.19391
12N2Y	8.43	f	Active EoE	NA	Prilosec	Zyrtec	None	Ad Lib	14.0167	108.786	11.7322	56.1595	2.24489	0	577.355	158.28	NA	386.53	533.622	NA	214.103	325.549	47.9723	25.2305	20.4779	0	58.8927	1.12244	367.818	460.076	214.103	325.549	36.6014	10.239	392.812	2.56145	0.276243	1.32232	0.0528576	0	13.5943	3.72683	NA	9.10113	12.5645	NA	5.04121	7.6653	1.12954
12N4G	9.78	m	Active EoE	NA	Prilosec	None	None	Food Trial	8.86957	137.808	87.9774	33.2823	27.4141	8.04867	321.879	38.8292	NA	269.372	291.156	NA	109.082	339.347	73.4895	0	0	0	86.3558	17.7314	180.354	280.264	109.082	339.347	36.7447	0	309.806	5.12778	3.2736	1.23842	1.02007	0.299488	11.977	1.44482	NA	10.0232	10.8338	NA	4.05889	12.627	2.73451
12NPG	13.06	f	Active EoE	09/10/2018	Prevacid	None	None	Elemental	3.84	69.1305	116.948	14.2061	32.4792	0	44.4073	15.7189	NA	311.377	NA	209.815	26.1223	218.181	59.8364	30.2799	8.71551	9.79911	66.7615	16.2396	30.0631	311.377	117.969	218.181	45.0581	9.25731	264.779	5.9415	10.0512	1.22096	2.79146	0	3.81664	1.35098	NA	26.7616	NA	18.0328	2.24511	18.7518	5.1427
12NT9	6.7	f	Active EoE	NA	None	Zyrtec	None	Elimination	5.85	34.602	6.12491	8.09739	32.1245	10.804	293.073	62.8388	NA	152.65	240.881	NA	47.9945	91.745	53.7025	46.4626	0	0	16.2748	21.4643	177.956	196.765	47.9945	91.745	50.0825	0	144.255	1.9521	0.345543	0.456822	1.81233	0.609519	16.534	3.54511	NA	8.6119	13.5895	NA	2.70765	5.17588	3.02967
12NWL	15.57	m	Active EoE	NA	None	None	None	Food Trial	9	43.2265	0	36.9081	0	25.2728	177.884	34.0382	NA	719.69	NA	NA	46.2844	324.992	125.602	142.248	0	0	26.7115	12.6364	105.961	719.69	46.2844	324.992	133.925	0	522.341	1.58513	0	1.35343	0	0.926763	6.52308	1.24819	NA	26.3913	NA	NA	1.69726	11.9176	4.60586
12NYM	8.55	m	Remission EoE	06/05/2018	Prilosec	Zyrtec	None	Elemental + Food Trial	3.73714	51.4128	3.55626	18.9591	41.5395	16.23	89.3931	26.801	32.4457	460.21	330.849	69.8468	68.1022	297.087	51.8018	52.5046	7.0607	1.29671	24.6427	28.8848	49.5466	395.529	68.9745	297.087	52.1532	4.1787	346.308	4.54034	0.314059	1.67431	3.66842	1.4333	7.89444	2.36684	2.86533	40.6419	29.2178	6.16828	6.01422	26.2362	4.5747
12P12	4.3	f	Control	NA	None	Zyrtec	None	Ad Lib	7.8	152.692	64.1183	35.1168	9.81577	0	29.0968	23.1669	NA	595.7	NA	NA	193.87	369.995	119.41	49.1923	0	0	83.9756	4.90788	26.1319	595.7	193.87	369.995	84.3012	0	482.848	6.46068	2.71297	1.48586	0.415324	0	1.23114	0.980237	NA	25.2052	NA	NA	8.20302	15.6552	5.05247
12P3R	17.76	f	Active EoE	NA	None	Zyrtec	None	Elemental + Food Trial	12.2786	102.89	17.6532	5.31407	5.01673	18.7664	130.533	113.019	NA	405.193	794.325	NA	121.48	377.127	94.1384	93.7982	0	0	41.9525	11.8916	121.776	599.759	121.48	377.127	93.9683	0	488.443	2.76557	0.474496	0.142836	0.134844	0.504419	3.50858	3.03782	NA	10.8911	21.3505	NA	3.26522	10.1367	2.53032
12RPA	19.21	f	Remission EoE	03/18/2019	Nexium	None	Zantac	Elemental + Food Trial	6.672	107.836	0	24.9887	32.628	43.6039	70.7473	72.7378	104.167	751.681	579.666	238.618	308.862	494.658	92.9253	155.67	9.42543	5.54383	44.2748	38.1159	82.5508	665.674	273.74	494.658	124.298	7.48463	580.166	5.33414	0	1.23608	1.61396	2.15688	3.49954	3.598	5.15267	37.1822	28.6734	11.8033	15.278	24.4685	4.59658
12RW5	5.94	m	Remission EoE	01/28/2019	Prevacid	Zyrtec	None	Elimination	1.53846	23.6994	13.4308	9.38285	6.10932	6.7849	23.458	15.6275	4.47053	153.093	97.9995	41.2188	21.5368	99.3595	20.3091	16.616	15.434	8.38627	15.5043	6.44711	14.5187	125.546	31.3778	99.3595	18.4626	11.9101	112.453	5.08403	2.88119	2.01282	1.31058	1.45551	5.03224	3.35244	0.959024	32.8418	21.023	8.84231	4.62011	21.3147	4.35673
12T26	8.07	m	Control	NA	Prevacid	Periactin	None	Ad Lib	7.71429	41.8469	9.28472	25.0895	0	22.5096	58.1777	40.7644	NA	390.578	846.876	NA	30.7268	527.509	83.3032	54.5253	0	35.0679	25.407	11.2548	49.471	618.727	30.7268	527.509	68.9143	17.5339	573.118	1.7903	0.397219	1.07338	0	0.963008	2.48896	1.74398	NA	16.7097	36.2311	NA	1.31455	22.5679	3.56388
12Y9H	4.59	f	Control	05/03/2019	None	None	None	Elimination	3.96	50.8843	10.5873	20.0093	98.1558	43.9743	18.4405	4.24418	0	300.286	63.9886	168.173	115.55	254.548	171.011	197.689	0.00830062	0	27.1603	71.0651	7.56157	182.137	141.862	254.548	184.35	0.00415031	218.342	4.24078	0.882365	1.66761	8.18047	3.66489	1.53686	0.353717	0	25.0263	5.33292	14.0158	9.63017	21.2144	14.2523
[truncated: 40 more columns]

## Sheet: Lymphoma cohort Fig 5
related to figure 5
1st cohort	sample type				cfDNA	cfDNA	cfDNA	cfDNA	cfDNA	cfDNA	cfDNA	cfDNA	cfDNA	cfDNA	cfDNA	cfDNA	cfDNA	cfDNA	cfDNA	cfDNA	cfDNA	cfDNA	cfDNA	cfDNA	cfDNA	cfDNA	cfDNA	cfDNA	cfDNA	cfDNA	cfDNA	cfDNA	cfDNA	cfDNA	cfDNA	cfDNA	cfDNA	cfDNA	cfDNA	cfDNA	cfDNA	cfDNA	cfDNA	cfDNA	cfDNA	cfDNA	cfDNA	cfDNA	cfDNA
	units			ng/ml	GE/ml	GE/ml	GE/ml	GE/ml	GE/ml	GE/ml	GE/ml	GE/ml	GE/ml	GE/ml	GE/ml	GE/ml	GE/ml	GE/ml	GE/ml	GE/ml	GE/ml	GE/ml	GE/ml	GE/ml	GE/ml	GE/ml	GE/ml	GE/ml	%	%	%	%	%	%	%	%	%	%	%	%	%	%	%	%	%	%	%	%	%
	cell type			total cfDNA	B-CELL3	B-CELL1	B-CELL2	CD8A	CD8B	EOSI3	EOSI2	EOSI1	NEUT2	NEUT1	MONO1	MONO2	NEUT3	TCELL1	TCELL2	TREG1	TREG2	B cells	CD8	Eosinophils	Monocytes	Neutrophils	T cell	Tregs	B cells	B cells	B cells	CD8	CD8	Eosinophils	Eosinophils	Eosinophils	Granulocytes	Granulocytes	Monocytes	Monocytes	Neutrophils	T cell	T cell	Tregs	Tregs	average	average	average	average
	age	sex	Diagnosis		B cells	B cells	B cells	CD8	CD8	Eosinophils	Eosinophils	Eosinophils	Granulocytes	Granulocytes	Monocytes	Monocytes	Neutrophils	T cell	T cell	Tregs	Tregs	average	average	average	average	average	average	average	B-CELL3	B-CELL1	B-CELL2	CD8A	CD8B	EOSI3	EOSI2	EOSI1	NEUT2	NEUT1	MONO1	MONO2	NEUT3	TCELL1	TCELL2	TREG1	TREG2	B cells	CD8	Eosinophils	Monocytes
LYMF			Hodgkin's Lymphoma	12	90.8549	86.3276	50.1976	136.005	40.0074	111.08	22.4869	0	723.552	517.549	432.443	99.3313	895.398	229.64	152.841	42.4535	26.3962	75.7934	88.0061	44.5223	265.887	757.974	191.24	34.4249	2.49876	2.37425	1.38057	3.74051	1.10031	3.05501	0.618452	0	19.8997	14.234	11.8934	2.73189	24.6259	6.31572	4.20354	1.16759	0.725969	2.08453	2.42041	1.22449	7.31263
LYMF 011	17.5	f	Hodgkin's Lymphoma	24	743.363	461.406	450.871	645.837	902.053	261.801	90.1908	2845.57	2183.05	2658.34	1076.81	1044.58	2078.08	790.435	291.151	437.061	335.827	551.88	773.945	1065.85	1060.69	2249.39	540.793	386.444	10.2223	6.34497	6.2001	8.88115	12.4045	3.60012	1.24025	39.1304	30.0199	36.5559	14.8076	14.3644	28.5765	10.8696	4.00372	6.01019	4.61808	7.58911	10.6428	14.6569	14.586
LYMF 012	77	f	Follicular lymphoma	14.0769	1384.65	869.093	133.918	126.731	98.7479	82.176	80.6347	463.62	973.019	762.838	275.406	333.162	575.111	172.492	78.3965	63.4561	79.9949	795.888	112.739	208.81	304.284	721.52	125.444	71.7255	32.4632	20.3758	3.13969	2.9712	2.31514	1.92661	1.89048	10.8696	22.8124	17.8847	6.45688	7.81096	13.4835	4.04408	1.838	1.48773	1.87548	18.6596	2.64317	4.89555	7.13392
LYMF 013	44	m	Diffuse large B cell lymphoma	8.775	136.006	93.478	95.5533	110.491	68.5269	62.5223	59.1937	339.692	717.031	733.628	360.769	193.118	629.202	104.374	92.3505	112.763	84.4821	108.346	89.5089	153.803	276.943	677.266	98.3625	98.6226	5.11527	3.51576	3.59382	4.15563	2.57734	2.3515	2.22631	12.776	26.968	27.5922	13.5687	7.26328	23.6647	3.92559	3.47336	4.24109	3.17742	4.07495	3.36648	5.78461	10.416
LYMF 014	75	m	Diffuse large B cell lymphoma	8.72727	117.399	330.472	71.3656	149.571	93.0669	33.9805	25.8839	495.02	531.302	474.89	441.067	281.638	516.514	141.907	144.279	92.8983	59.3633	173.079	121.319	184.961	361.353	509.805	143.093	76.1308	4.43961	12.4972	2.69878	5.65622	3.51944	1.28502	0.978832	18.7198	20.0919	17.9586	16.6795	10.6505	19.5327	5.36641	5.45611	3.51307	2.2449	6.54521	4.58783	6.99455	13.665
LYMF 015	19	f	Hodgkin's Lymphoma	7.92	40.7585	127.121	0.405301	85.2351	99.6541	40.715	22.7679	0	742.917	807.997	360.895	319.299	521.359	180.274	240.042	0	18.6047	56.0948	92.4446	21.161	340.097	648.408	210.158	9.30234	1.69844	5.29722	0.0168892	3.55182	4.15267	1.69663	0.948758	0	30.958	33.6699	15.0388	13.3055	21.7255	7.51216	10.0028	0	0.775273	2.33752	3.85224	0.881795	14.1721
LYMF 016	60	m	Diffuse large B cell lymphoma	19.3125	1059.94	784.823	209.155	69.2456	54.5914	51.2249	77.9447	32.9275	3913.14	1358.83	133.519	105.233	1539.04	152.541	178.931	34.4008	30.3677	684.64	61.9185	54.0324	119.376	2087.51	165.736	32.3842	18.1134	13.4119	3.57426	1.18334	0.932917	0.875386	1.332	0.562701	66.8721	23.2211	2.28172	1.79834	26.3008	2.60678	3.05777	0.587878	0.518956	11.6999	1.05813	0.923364	2.04003
LYMF 017	88	f	Diffuse large B cell lymphoma	4.84	142.445	17.4708	15.1351	82.6401	36.3656	23.2747	42.5065	26.0021	421.738	507.093	220.338	137.328	443.834	220.91	141.12	0.0235351	2.92647	58.3503	59.5028	30.5945	178.833	454.125	181.015	1.475	9.71313	1.19131	1.03204	5.63511	2.47972	1.58707	2.89846	1.77305	28.7577	34.578	15.0245	9.36423	30.2644	15.0635	9.6228	0.00160483	0.199552	3.97883	4.05742	2.08619	12.1944
LYMF 018	81	m	Follicular lymphoma	6.81429	77.276	90.0449	45.0467	84.7036	13.9809	99.6683	99.073	11.3447	974.172	316.256	277.294	109.139	663.45	180.678	195.433	8.0597	7.78887	70.7892	49.3422	70.0287	193.216	654.332	188.056	7.92428	3.74267	4.3611	2.18172	4.10241	0.677129	4.82719	4.79836	0.549451	47.1816	15.3171	13.43	5.28588	32.1326	8.75069	9.46533	0.390351	0.377235	3.4285	2.38977	3.39167	9.35795
LYMF 019	27	f	Hodgkin's Lymphoma	12.269	61.074	58.8816	47.4222	114.291	40.0109	80.5551	100.448	115.196	1258.59	952.504	364.166	123.47	1034.96	235.834	206.634	24.0064	31.9362	55.7926	77.1508	98.7328	243.818	1070.25	221.234	27.9713	1.64288	1.5839	1.27565	3.0744	1.07629	2.16692	2.70202	3.09874	33.8557	25.6222	9.796	3.32132	27.8403	6.34389	5.55843	0.645768	0.859077	1.50081	2.07534	2.65589	6.55866
LYMF 021	57	m	Diffuse large B cell lymphoma	64.32	1037.65	618.525	525.863	1080.22	2096.43	223.294	194.928	60.5247	3679.48	1489.01	2953.51	3927.8	2053.4	1972.9	2652.36	32.4177	61.3153	727.347	1588.33	159.582	3440.66	2318.82	2312.63	46.8665	5.32431	3.17372	2.69826	5.54275	10.757	1.14575	1.0002	0.310559	18.8798	7.64026	15.1548	20.154	10.5362	10.1231	13.6095	0.166339	0.314615	3.7321	8.14987	0.818834	17.6544
LYMF 035	19	m	Follicular lymphoma	12.048	32.001	80.9483	0.133279	18.2872	11.3335	40.1141	36.5004	331.344	1048.87	544.06	248.705	201.624	942.678	135.457	49.9015	14.2076	24.5265	37.6942	14.8103	135.986	225.164	869.571	92.6792	19.3671	0.87661	2.21743	0.00365092	0.500945	0.31046	1.09885	0.999863	9.07656	28.7318	14.9035	6.81282	5.52312	25.8229	3.71059	1.36696	0.389192	0.671858	1.03256	0.405703	3.72509	6.16797
LYMF 036	73	m	Hodgkin's Lymphoma	6.54286	42.329	31.1481	27.7657	12.8058	0.379472	46.4522	16.5031	NA	752.035	NA	182.038	96.5581	563.597	52.4916	63.0177	24.3448	12.101	33.7476	6.59261	31.4776	139.298	657.816	57.7547	18.2229	2.13515	1.57116	1.40055	0.645944	0.0191412	2.34313	0.832444	NA	37.9339	NA	9.18229	4.87056	28.4288	2.64777	3.17872	1.22799	0.610398	1.70229	0.332543	1.58779	7.02642
LYMF 037	67	f	Follicular lymphoma	8.376	33.511	93.7493	48.6346	34.0171	24.5249	242.993	81.6524	NA	729.057	553.279	331.384	125.91	581.888	59.1545	55.9608	22.7802	0	58.6316	29.271	162.323	228.647	611.528	57.5577	11.3901	1.32041	3.69393	1.91631	1.34035	0.966334	9.57447	3.21728	NA	28.7265	21.8004	13.0573	4.96113	22.9277	2.33082	2.20498	0.897591	0	2.31022	1.15334	6.39588	9.0092
LYMF 039	47	f	Follicular lymphoma	23.2	1320.04	853.582	672.348	277.432	208.413	385.357	107.183	211.272	1779.09	973.926	1170.18	447.612	1106.28	500.717	387.152	381.984	221.425	948.658	242.922	234.604	808.893	1241.4	443.934	301.705	18.7784	12.1427	9.56452	3.94662	2.96479	5.48191	1.52475	3.00546	25.3086	13.8546	16.6464	6.36753	15.7375	7.12298	5.50745	5.43394	3.1499	13.4952	3.4557	3.33737	11.507
LYMF 040	27	m	Hodgkin's Lymphoma	9	48.1005	9.90365	4.99351	35.6362	12.5854	139.762	69.3439	69.63	685.168	607.658	126.326	99.0831	693.86	52.1182	33.1702	11.5845	10.862	20.9992	24.1108	92.9121	112.704	670.137	42.6442	11.2232	1.76386	0.36317	0.183114	1.30679	0.46151	5.12514	2.54286	2.55335	25.1253	22.283	4.6324	3.63341	25.4441	1.91119	1.21636	0.424807	0.398313	0.770048	0.884151	3.40712	4.13291
LYMF HMT			Follicular lymphoma	2.35	41.7943	42.2215	25.2006	33.7115	39.2727	36.6432	34.8245	78.9996	226.511	235.386	88.498	77.885	173.268	88.6579	45.9102	40.7987	20.8449	36.4055	36.4921	50.1558	83.1915	202.108	67.284	30.8218	5.86958	5.92957	3.53915	4.73442	5.51544	5.14616	4.89074	11.0947	31.8111	33.0575	12.4286	10.9381	24.3337	12.4511	6.44761	5.72975	2.92745	5.11277	5.12493	7.04386	11.6834
2nd cohort
LYMF 020	57	f	Hodgkin's Lymphoma	8.46429	92.8733	23.1178	55.2043	7.4379	11.0746	161.894	43.1404	40.8785	1134.84	530.141	357.613	144.9	439.161	59.1149	127.77	15.516	3.49229	57.0651	9.25625	81.9709	251.256	701.381	93.4424	9.50414	3.62125	0.901393	2.15248	0.290013	0.431812	6.31244	1.6821	1.5939	44.2488	20.6709	13.9438	5.64982	17.1235	2.30496	4.98191	0.604988	0.136169	2.22504	0.360913	3.19615	9.79679
LYMF 022	69	m	Diffuse large B cell lymphoma	13.5	24.7516	18.9191	2.53131	18.5844	6.1876	44.1029	32.1461	16.4608	1016.51	946.487	398.658	176.169	1094.04	96.0713	82.4973	10.734	6.66457	15.4007	12.386	30.9033	287.413	1019.01	89.2843	8.6993	0.6051	0.462512	0.0618827	0.454332	0.151268	1.07818	0.785873	0.402414	24.8504	23.1387	9.74594	4.30679	26.7459	2.34865	2.0168	0.262414	0.162928	0.376498	0.3028	0.755489	7.02636
LYMF 023	62	m	Hodgkin's Lymphoma	29.1667	249.831	115.085	123.53	252.237	128.715	87.0033	183.959	89.2412	4418.04	1464.13	442.571	267.995	1761.07	656.364	1216.05	46.4078	47.4895	162.815	190.476	120.068	355.283	2547.75	936.205	46.9486	2.82695	1.30224	1.39779	2.85417	1.45646	0.984478	2.08158	1.0098	49.9919	16.5672	5.00787	3.03248	19.9273	7.42703	13.7601	0.525123	0.537363	1.84232	2.15532	1.35862	4.02017
LYMF 024	45	m	Hodgkin's Lymphoma	22.5333	144.546	100.406	49.3257	42.2737	25.5367	191.028	191.796	NA	3874.19	2063.29	395.06	199.687	2006.24	161.662	156.876	24.9766	12.9218	98.0927	33.9052	191.412	297.374	2647.91	159.269	18.9492	2.11709	1.47059	0.722445	0.619159	0.374022	2.79788	2.80912	NA	56.7431	30.2198	5.78623	2.9247	29.3842	2.36777	2.29768	0.365819	0.189258	1.43671	0.496591	2.8035	4.35547
LYMF 025	66	m	Diffuse large B cell lymphoma	7.625	111.578	NA	3.76336	37.7428	24.3109	44.2948	43.836	NA	1363.1	NA	325.505	NA	655.573	7.03011	29.9805	0	30.3464	57.6708	31.0269	44.0654	325.505	1009.34	18.5053	15.1732	4.82945	NA	0.16289	1.63362	1.05225	1.91721	1.89736	NA	58.999	NA	14.0888	NA	28.3752	0.304284	1.29765	0	1.31349	2.49617	1.34294	1.90728	14.0888
LYMF 029	76	m	Diffuse large B cell lymphoma	171.652	20148.2	NA	1489.99	744.498	588.372	704.502	238.161	NA	NA	NA	1213.08	NA	2826.36	1829.76	2187.04	569.394	398.605	10819.1	666.435	471.331	1213.08	2826.36	2008.4	484	38.7386	NA	2.86479	1.43143	1.13125	1.35453	0.457908	NA	NA	NA	2.33236	NA	5.4342	3.51805	4.20499	1.09477	0.766392	20.8017	1.28134	0.906221	2.33236
LYMF 030	86	m	Diffuse large B cell lymphoma	34	5257.73	4535.72	506.291	87.8912	125.063	55.7444	326.137	NA	3693.37	NA	324.54	36.063	681.284	156.091	317.107	74.26	60.6	3433.25	106.477	190.941	180.301	2187.33	236.599	67.43	51.036	44.0276	4.91449	0.853147	1.21397	0.541103	3.16576	NA	35.851	NA	3.15026	0.350058	6.61312	1.51515	3.07811	0.720831	0.588235	33.326	1.03356	1.85343	1.75016
LYMF 032	23	f	Hodgkin's Lymphoma	3.42	36.9673	NA	13.8454	54.1201	26.8233	29.1904	19.0378	NA	NA	NA	75.4624	NA	176.788	61.1672	NA	4.24088	0	25.4064	40.4717	24.1141	75.4624	176.788	61.1672	2.12044	3.56738	NA	1.3361	5.22264	2.58847	2.8169	1.83716	NA	NA	NA	7.28218	NA	17.0602	5.90269	NA	0.409249	0	2.45174	3.90556	2.32703	7.28218
LYMF 034	49	f	Hodgkin's Lymphoma	7.35	9.58933	36.6149	12.496	18.3317	15.2637	10.1861	52.8618	NA	1382.5	NA	189.31	NA	445.725	22.2587	51.2312	3.45246	0	19.5668	16.7977	31.524	189.31	914.114	36.7449	1.72623	0.430585	1.6441	0.561101	0.823139	0.685376	0.45738	2.37363	NA	62.0778	NA	8.50048	NA	20.0141	0.999468	2.30041	0.155024	0	0.878595	0.754257	1.4155	8.50048
LYMF 074	57	m	Hodgkin's Lymphoma	10.56	61.3276	NA	23.223	142.413	113.568	45.5219	52.4159	NA	1791.12	NA	355.767	NA	613.264	450.394	434.745	40.4748	17.75	42.2753	127.99	48.9689	355.767	1202.19	442.569	29.1124	1.91668	NA	0.725793	4.45084	3.54935	1.4227	1.63816	NA	55.9781	NA	11.1188	NA	19.1664	14.0762	13.5871	1.26496	0.554745	1.32124	4.00009	1.53043	11.1188
[truncated: 30 more columns]

## Sheet: Healthy 2nd lymphoma cohort
related to figure 5
	sample type			cfDNA	cfDNA	cfDNA	cfDNA	cfDNA	cfDNA	cfDNA	cfDNA	cfDNA	cfDNA	cfDNA	cfDNA	cfDNA	cfDNA	cfDNA	cfDNA	cfDNA	cfDNA	cfDNA	cfDNA	cfDNA	cfDNA	cfDNA	cfDNA	cfDNA	cfDNA	cfDNA	cfDNA	cfDNA	cfDNA	cfDNA	cfDNA	cfDNA	cfDNA	cfDNA	cfDNA	cfDNA	cfDNA	cfDNA	cfDNA	cfDNA	cfDNA	cfDNA	cfDNA	cfDNA	cfDNA
	units		ng/ml	GE/ml	GE/ml	GE/ml	GE/ml	GE/ml	GE/ml	GE/ml	GE/ml	GE/ml	GE/ml	GE/ml	GE/ml	GE/ml	GE/ml	GE/ml	GE/ml	GE/ml	GE/ml	GE/ml	GE/ml	GE/ml	GE/ml	GE/ml	GE/ml	%	%	%	%	%	%	%	%	%	%	%	%	%	%	%	%	%	%	%	%	%	%
	cell type		total cfDNA	B-CELL3	B-CELL1	B-CELL2	CD8A	CD8B	EOSI3	EOSI2	EOSI1	NEUT2	NEUT1	MONO1	MONO2	NEUT3	TCELL1	TCELL2	TREG1	TREG2	B cells	CD8	Eosinophils	Monocytes	Neutrophils	T cell	Tregs	B cells	B cells	B cells	CD8	CD8	Eosinophils	Eosinophils	Eosinophils	Granulocytes	Granulocytes	Monocytes	Monocytes	Neutrophils	T cell	T cell	Tregs	Tregs	average	average	average	average	average
	age	sex		B cells	B cells	B cells	CD8	CD8	Eosinophils	Eosinophils	Eosinophils	Granulocytes	Granulocytes	Monocytes	Monocytes	Neutrophils	T cell	T cell	Tregs	Tregs	average	average	average	average	average	average	average	B-CELL3	B-CELL1	B-CELL2	CD8A	CD8B	EOSI3	EOSI2	EOSI1	NEUT2	NEUT1	MONO1	MONO2	NEUT3	TCELL1	TCELL2	TREG1	TREG2	B cells	CD8	Eosinophils	Monocytes	Neutrophils
V_cov 001#1	38	m	14.58	34.2245	6.11311	5.4772	0	5.59575	421.501	181.922	NA	2250.04	NA	252.866	63.4242	1113.31	49.0224	109.172	0	0	15.2716	2.79787	301.711	158.145	1681.68	79.0973	0	0.774707	0.138376	0.123982	0	0.126665	9.5411	4.11798	NA	50.932	NA	5.72387	1.43567	25.201	1.10967	2.47122	0	0	0.345688	0.0633327	6.82954	3.57977	38.0665
V_cov 003#1	63	m	5.1	39.1306	1.80896	1.88247	0.0489182	12.1113	69.4983	10.9679	8.7141	482.263	175.253	93.0575	51.6391	242.371	9.85264	5.49068	4.91418	0	14.274	6.08011	29.7268	72.3483	299.962	7.67166	2.45709	2.53223	0.117062	0.121819	0.00316561	0.783751	4.4974	0.709759	0.56391	31.2083	11.341	6.02197	3.34169	15.6844	0.637587	0.355315	0.318008	0	0.923704	0.393458	1.92369	4.68183	19.4113
V_cov 004#1	35	m	3.915	6.51797	0	3.1285	3.99786	8.93025	69.4593	26.2197	NA	642.078	215.839	134.335	38.6006	247.064	9.35038	23.8536	0	7.81943	3.21549	6.46406	47.8395	86.4677	368.327	16.602	3.90972	0.549463	0	0.263731	0.337018	0.752817	5.85539	2.21031	NA	54.1269	18.1951	11.3244	3.25402	20.8274	0.788234	2.01085	0	0.659175	0.271065	0.544918	4.03285	7.2892	31.0498
V_cov 005#1	40	f	4.035	40.6318	14.5937	2.85767	2.85887	0.702881	82.3159	25.7012	NA	634.825	443.378	123.869	137.852	243.833	27.9097	26.0554	0	0	19.3611	1.78088	54.0086	130.861	440.679	26.9825	0	3.32338	1.19366	0.233736	0.233834	0.0574904	6.73283	2.10217	NA	51.9239	36.2651	10.1316	11.2753	19.9437	2.2828	2.13113	0	0	1.58359	0.145662	4.4175	10.7034	36.0442
V_cov 006#1	40	f	5.265	15.5266	0.660304	0.0648912	2.04066	3.9569	16.7437	20.846	27.1045	1066.33	648.753	100.345	79.3212	629.354	10.4602	33.0234	0	0	5.41727	2.99878	21.5647	89.8329	781.481	21.7418	0	0.973275	0.0413907	0.00406766	0.127918	0.248036	1.04957	1.30672	1.69903	66.8424	40.6667	6.29003	4.97219	39.4506	0.655693	2.07005	0	0	0.339578	0.187977	1.35177	5.63111	48.9866
V_cov 007#1	34	f	4.515	5.00596	0	5.12945	0	5.14085	56.5192	32.4965	49.166	851.344	475.193	147.167	45.8774	398.312	14.8787	5.06371	0.126975	3.33289	3.37847	2.57042	46.0606	96.522	574.95	9.97119	1.72993	0.365921	0	0.374947	0	0.37578	4.13138	2.3754	3.59389	62.2307	34.7352	10.7574	3.3535	29.1154	1.08759	0.370142	0.00928148	0.243624	0.246956	0.18789	3.36689	7.05547	42.0271
V_cov 015#1	44	f	6.87	38.167	23.7418	11.2265	22.1489	14.1934	109.321	50.7051	95.057	1281.44	852.664	158.752	60.4883	728.849	31.7342	26.8079	3.04229	9.62309	24.3784	18.1712	85.0276	109.62	954.317	29.2711	6.33269	1.83353	1.14055	0.539318	1.06403	0.681846	5.25173	2.43586	4.56651	61.56	40.9618	7.6264	2.90584	35.0137	1.5245	1.28785	0.146151	0.462291	1.17113	0.872938	4.0847	5.26612	45.8452
V_cov 017#1			6.45	29.4606	3.25207	0.0220933	10.3748	6.05638	248.677	30.7849	93.7944	823.569	445.383	130.41	114.38	394.522	31.1803	41.7588	6.49524	12.944	10.9116	8.21557	124.419	122.395	554.491	36.4695	9.71964	1.50744	0.166401	0.00113047	0.530855	0.309892	12.7243	1.5752	4.79926	42.1403	22.7893	6.67278	5.85258	20.1869	1.59543	2.13671	0.332348	0.66232	0.558323	0.420374	6.36625	6.26268	28.3722
V_cov 018#1	29	f	3.375	27.2441	17.8781	5.14486	61.2665	41.2024	88.8163	18.7332	30.9301	616.582	359.962	101.64	74.2228	240.165	37.8907	21.7804	17.775	0	16.7557	51.2344	46.1598	87.9315	405.569	29.8355	8.88748	2.66413	1.74825	0.503103	5.9911	4.02909	8.68513	1.83187	3.02457	60.294	35.1998	9.93916	7.25806	23.4851	3.70524	2.12985	1.73817	0	1.6385	5.01009	4.51386	8.59861	39.6596
V_cov 019#1	40	f	3.84	38.3037	0	7.18093	17.2966	19.0745	201.966	34.7797	NA	799.319	532.79	89.4128	68.4238	298.94	24.9234	14.6522	5.00224	2.66171	15.1616	18.1856	118.373	78.9183	543.683	19.7878	3.83197	3.29206	0	0.617173	1.48657	1.63938	17.3582	2.98918	NA	68.6983	45.7912	7.68468	5.88076	25.6927	2.14207	1.2593	0.429923	0.228763	1.30308	1.56298	10.1737	6.78272	46.7274
V_cov 023#1	35	m	5.7	36.2274	0.373589	0.0477997	0.0791558	6.62342	127.462	29.3475	NA	998.074	542.778	154.607	59.7468	395.657	19.3786	38.7556	0	0	12.2163	3.35129	78.4048	107.177	645.503	29.0671	0	2.09759	0.021631	0.00276763	0.00458316	0.383499	7.38013	1.69924	NA	57.789	31.4271	8.9518	3.45937	22.9088	1.12203	2.24397	0	0	0.707328	0.194041	4.53968	6.20559	37.375
V_cov 024#1	43	f	1.815	10.6842	NA	2.2675	0	3.56896	NA	NA	NA	NA	NA	NA	NA	105.408	7.9574	NA	0	2.82437	6.47585	1.78448	NA	NA	105.408	7.9574	1.41218	1.94278	NA	0.412314	0	0.648968	NA	NA	NA	NA	NA	NA	NA	19.1669	1.44695	NA	0	0.513573	1.17755	0.324484	NA	NA	19.1669
V_cov 025#1	43	m	13.8643	58.1839	NA	0	35.1761	3.44052	NA	166.569	NA	NA	NA	217.905	NA	1139.08	97.9933	NA	0	0	29.092	19.3083	166.569	217.905	1139.08	97.9933	0	1.38504	NA	0	0.837351	0.0819001	NA	3.96511	NA	NA	NA	5.18713	NA	27.1154	2.33269	NA	0	0	0.692521	0.459626	3.96511	5.18713	27.1154
V_cov 026#1	39	f	5.11765	22.6612	NA	3.01301	11.1115	12.6069	46.9893	14.1855	NA	NA	NA	70.6665	NA	202.867	18.2621	NA	0	6.82728	12.8371	11.8592	30.5874	70.6665	202.867	18.2621	3.41364	1.4614	NA	0.194307	0.716573	0.813008	3.0303	0.914808	NA	NA	NA	4.55722	NA	13.0827	1.17771	NA	0	0.440286	0.827854	0.76479	1.97256	4.55722	13.0827
V_cov 027#1	52	f	5.58	38.8336	NA	1.09877	0.666433	0	NA	19.6903	NA	NA	NA	129.123	NA	500.53	30.9221	NA	10.1405	0	19.9662	0.333216	19.6903	129.123	500.53	30.9221	5.07027	2.29684	NA	0.0649878	0.0394166	0	NA	1.1646	NA	NA	NA	7.63708	NA	29.6042	1.82891	NA	0.599769	0	1.18091	0.0197083	1.1646	7.63708	29.6042
V_cov 028#1	70	m	6.81538	31.7761	NA	3.12628	2.69414	7.24901	277.757	67.724	NA	1373.25	NA	157.223	NA	416.755	13.8448	NA	0	0	17.4512	4.97158	172.74	157.223	895.002	13.8448	0	1.53875	NA	0.151389	0.130463	0.351031	13.4503	3.27952	NA	66.4992	NA	7.61347	NA	20.1812	0.67043	NA	0	0	0.84507	0.240747	8.3649	7.61347	43.3402
V_cov 030#1	33	m	3.75385	46.7299	NA	2.24907	3.15949	1.7429	NA	NA	NA	NA	NA	95.2707	NA	481.419	24.3346	NA	8.70471	NA	24.4895	2.45119	NA	95.2707	481.419	24.3346	8.70471	4.10843	NA	0.197735	0.277778	0.153233	NA	NA	NA	NA	NA	8.37607	NA	42.3257	2.13946	NA	0.765306	NA	2.15308	0.215505	NA	8.37607	42.3257
V_cov 031#1	51	f	4.53	30.1947	9.9997	6.12729	2.77182	0	57.2601	22.1487	12.6312	788.522	509.119	144.845	48.5873	358.981	11.3682	11.026	3.71997	0	15.4406	1.38591	30.68	96.7162	552.207	11.1971	1.85999	2.19984	0.728528	0.446403	0.201941	0	4.17168	1.61365	0.920245	57.4478	37.0919	10.5527	3.53982	26.1535	0.828229	0.803302	0.271019	0	1.12492	0.10097	2.23519	7.04626	40.231
V_cov 032#1	35	f	3.075	13.1789	5.70037	2.86754	13.7971	0	59.1871	25.2418	NA	441.149	461.177	37.525	16.8367	265.04	8.80333	24.7831	0	0.0272211	7.24893	6.89856	42.2144	27.1808	389.122	16.7932	0.0136106	1.41446	0.611808	0.307766	1.48081	0	6.35242	2.70915	NA	47.3475	49.4971	4.02748	1.80704	28.4462	0.944842	2.65991	0	0.00292158	0.778012	0.740407	4.53078	2.91726	41.7636
V_cov 033#1	42	m	9.96	23.4435	8.08722	5.36528	2.59395	3.34008	95.7131	64.6159	NA	1513.32	NA	172.634	37.8882	685.612	31.0621	55.2202	0	6.04094	12.2987	2.96702	80.1645	105.261	1099.46	43.1411	3.02047	0.776819	0.267977	0.177783	0.0859528	0.110676	3.17154	2.1411	NA	50.145	NA	5.72038	1.25546	22.7183	1.02927	1.82977	0	0.200172	0.407526	0.0983146	2.65632	3.48792	36.4317
V_cov 034#1	60	f	3.525	10.9895	6.47318	2.13054	7.61981	3.94659	39.9632	33.5154	NA	807.292	NA	146.524	NA	325.622	13.9255	54.7001	5.71444	0	6.53109	5.7832	36.7393	146.524	566.457	34.3128	2.85722	1.02891	0.606061	0.199475	0.713416	0.369505	3.74161	3.13792	NA	75.5838	NA	13.7185	NA	30.4868	1.30379	5.12137	0.535022	0	0.611482	0.54146	3.43976	13.7185	53.0353
V_cov 035#1	55	m	11.85	43.1282	3.40014	0.0815182	9.62291	15.0452	132.963	49.7252	NA	1900.95	NA	322.035	93.4344	796.181	44.2204	95.9738	8.60668	0	15.5366	12.3341	91.3443	207.735	1348.57	70.0971	4.30334	1.20116	0.094697	0.00227035	0.268007	0.419023	3.70315	1.38489	NA	52.9432	NA	8.96896	2.60223	22.1743	1.23158	2.67296	0.239704	0	0.432709	0.343515	2.54402	5.7856	37.5588
V_cov 036#1	56	f	10.2643	38.4085	0	11.0045	10.8491	16.0367	77.0984	47.2587	NA	1264.91	496.379	320.686	75.7662	451.452	21.0171	53.7033	12.6734	1.6674	16.471	13.4429	62.1786	198.226	737.582	37.3602	7.1704	1.23497	0	0.353833	0.348837	0.515637	2.47899	1.51953	NA	40.6714	15.9603	10.3112	2.43615	14.5158	0.675775	1.72675	0.407494	0.0536129	0.5296	0.432237	1.99926	6.37367	23.7158
V_cov 037#1	54	f	6.045	33.5432	0	1.94682	0.0498153	0.911449	75.2899	24.7442	46.5438	735.476	564.867	321.679	106.346	416.164	17.6798	27.6231	2.46671	0.0335256	11.83	0.480632	48.8593	214.012	572.169	22.6514	1.25012	1.83133	0	0.106289	0.00271972	0.0497615	4.11053	1.35093	2.54111	40.154	30.8395	17.5624	5.80604	22.7209	0.965245	1.50811	0.134672	0.00183036	0.645872	0.0262406	2.66752	11.6842	31.2382
V_cov 038#1	30	m	5.28	23.9835	4.06896	5.48854	12.1359	4.29781	148.275	59.5292	NA	931.591	460.448	149.93	49.6944	371.888	38.6382	23.621	0	0	11.1803	8.21686	103.902	99.8124	587.976	31.1296	0	1.49912	0.254335	0.343068	0.75857	0.26864	9.26814	3.72095	NA	58.2303	28.7809	9.37159	3.10621	23.2453	2.41513	1.47646	0	0	0.69884	0.513605	6.49454	6.2389	36.7522
V_cov 039#1	31	m	6.23571	24.0695	5.15851	7.74429	0.0782126	0.0430765	101.413	37.0074	NA	1005.45	428.906	257.686	49.9076	453.25	11.0866	32.0146	0	0.101168	12.3241	0.0606446	69.2101	153.797	629.201	21.5506	0.0505842	1.27391	0.273021	0.409876	0.0041395	0.00227988	5.3674	1.95866	NA	53.2146	22.7004	13.6384	2.64142	23.9888	0.586772	1.69441	0	0.00535447	0.652269	0.00320969	3.66303	8.13989	33.3013
V_cov 040#1	38	m	9.12	37.5158	0	5.32242	13.2449	0	158.764	87.7308	NA	1668.73	NA	208.633	78.1935	773.715	9.70538	60.525	0	5.07827	14.2794	6.62246	123.247	143.413	1221.22	35.1152	2.53913	1.35762	0	0.192607	0.479305	0	5.74532	3.17479	NA	60.3876	NA	7.54998	2.82965	27.9991	0.351217	2.19027	0	0.183772	0.516741	0.239653	4.46005	5.18982	44.1933
V_cov 041#1	54	m	10.52	31.1922	8.64775	3.13007	7.149	3.82603	169.113	130.032	NA	1909.42	NA	410.776	128.344	874.864	13.7553	8.02767	6.45069	0	14.3233	5.48751	149.573	269.56	1392.14	10.8915	3.22534	0.97856	0.271297	0.0981965	0.224278	0.12003	5.30542	4.07936	NA	59.9024	NA	12.8869	4.0264	27.4462	0.43153	0.251844	0.202371	0	0.449351	0.172154	4.69239	8.45663	43.6743
V_cov 042#1	65	f	3.49412	22.855	1.51197	2.0742	2.20426	0.154287	15.5051	27.3443	NA	513.814	196.942	182.463	76.3936	170.398	22.0238	21.4555	7.36096	2.46944	8.81374	1.17927	21.4247	129.428	293.718	21.7396	4.9152	2.15875	0.142812	0.195917	0.208201	0.014573	1.46451	2.58277	NA	48.5317	18.602	17.2344	7.21567	16.0948	2.08024	2.02655	0.695271	0.233248	0.832492	0.111387	2.02364	12.225	27.7428
V_cov 043#1	65	f	8.45143	91.6923	7.80726	16.2043	9.59404	24.5495	146.484	86.6278	NA	1629.43	NA	209.194	137.032	746.84	104.557	113.782	5.38395	0	38.568	17.0718	116.556	173.113	1188.14	109.17	2.69198	3.58064	0.304878	0.632787	0.374653	0.958671	5.72029	3.38286	NA	63.6302	NA	8.16915	5.35117	29.1645	4.08299	4.44327	0.210246	0	1.5061	0.666662	4.55158	6.76016	46.3974
V_cov 044#1	66	m	8.22222	48.5586	0	3.30372	4.70234	9.22532	257.447	84.5445	155.28	1409.54	715.861	221.662	73.2025	555.785	20.3539	13.2998	0	0.0650207	17.2875	6.96383	165.757	147.432	893.728	16.8268	0.0325104	1.9491	0	0.132608	0.188748	0.370296	10.3337	3.39354	6.23281	56.5776	28.7341	8.89733	2.93829	22.3088	0.816987	0.533843	0	0.00260988	0.693904	0.279522	6.65335	5.91781	35.8735
V_cov 045#1	53	f	7.92	33.0958	5.95163	4.23222	6.15975	2.88652	134.459	86.4806	184.879	1518.12	917.603	125.518	73.5228	774.577	34.8694	55.0914	0.131282	1.75142	14.4266	4.52313	135.273	99.5206	1070.1	44.9804	0.941352	1.37913	0.248009	0.17636	0.256682	0.120284	5.60301	3.60372	7.70404	63.2611	38.2373	5.23046	3.06376	32.2773	1.45304	2.2957	0.00547064	0.0729832	0.601167	0.188483	5.63692	4.14711	44.5919
V_cov 046#1	46	m	9.20526	40.0263	1.16947	5.51481	9.31766	0	80.6305	28.6353	NA	1040.42	NA	162.156	71.8066	335.629	20.2012	78.0251	3.91521	0	15.5702	4.65883	54.6329	116.982	688.026	49.1131	1.9576	1.43505	0.0419287	0.197721	0.334063	0	2.89082	1.02665	NA	37.3019	NA	5.81374	2.57446	12.0332	0.724265	2.7974	0.140371	0	0.558232	0.167031	1.95873	4.1941	24.6675
V_cov 047#1	51	f	3.6	29.6947	15.9785	9.91823	19.3374	9.4284	23.4437	8.91536	NA	700.334	NA	111.63	33.0545	116.786	33.5427	40.2818	0	0	18.5305	14.3829	16.1795	72.3424	408.56	36.9123	0	2.72228	1.46484	0.909262	1.77277	0.864357	2.14922	0.817323	NA	64.2037	NA	10.2338	3.0303	10.7064	3.07505	3.69287	0	0	1.6988	1.31856	1.48327	6.63205	37.4551
[truncated: 27 more columns]

## Sheet: Lymphoma before and after treat
related to figure 5
	sample type						cfDNA	cfDNA	cfDNA	cfDNA	cfDNA	cfDNA	cfDNA	cfDNA	cfDNA	cfDNA	cfDNA	cfDNA	cfDNA	cfDNA	cfDNA	cfDNA	cfDNA	cfDNA	cfDNA	cfDNA	cfDNA	cfDNA	cfDNA	cfDNA
	units					ng/ml	GE/ml	GE/ml	GE/ml	GE/ml	GE/ml	GE/ml	GE/ml	GE/ml	GE/ml	GE/ml	GE/ml	GE/ml	GE/ml	GE/ml	GE/ml	GE/ml	GE/ml	GE/ml	GE/ml	GE/ml	GE/ml	GE/ml	GE/ml	GE/ml
	cell type						B-CELL3	B-CELL1	B-CELL2	CD8A	CD8B	EOSI3	EOSI2	EOSI1	NEUT2	NEUT1	MONO1	MONO2	NEUT3	TCELL1	TCELL2	TREG1	TREG2	B cells	CD8	Eosinophils	Monocytes	Neutrophils	T cell	Tregs
	age	sex	Diagnosis	treatment #	response to treatment		B cells	B cells	B cells	CD8	CD8	Eosinophils	Eosinophils	Eosinophils	Granulocytes	Granulocytes	Monocytes	Monocytes	Neutrophils	T cell	T cell	Tregs	Tregs	average	average	average	average	average	average	average
LYMF 013	44	m	Diffuse large B cell lymphoma	before		8.775	136.006	93.478	95.5533	110.491	68.5269	62.5223	59.1937	339.692	717.031	733.628	360.769	193.118	629.202	104.374	92.3505	112.763	84.4821	108.346	89.5089	153.803	276.943	677.266	98.3625	98.6226
LYMF 013B				2nd treatment	remission	7.64	13.5705	18.5296	3.9451	18.7863	22.5413	273.874	32.1214	26.989	331.726	139.462	1239.13	642.729	504.294	24.8731	83.1692	0	0	12.0151	20.6638	110.995	235.594	795.386	54.0211	0
LYMF 014	75	m	Diffuse large B cell lymphoma	before		8.72727	117.399	330.472	71.3656	149.571	93.0669	33.9805	25.8839	495.02	531.302	474.89	441.067	281.638	516.514	141.907	144.279	92.8983	59.3633	173.079	121.319	184.961	361.353	509.805	143.093	76.1308
LYMF 014B				2nd treatment	progression 05.2020	7.44	19.8601	NA	0	60.0449	11.7483	22.2361	70.1044	NA	216.731	99.0991	1236.99	589.495	646.113	21.555	51.4143	0	0	9.93004	35.8966	46.1702	157.915	824.201	36.4847	0
LYMF 015	19	f	Hodgkin's Lymphoma	before		7.92	40.7585	127.121	0.405301	85.2351	99.6541	40.715	22.7679	0	742.917	807.997	360.895	319.299	521.359	180.274	240.042	0	18.6047	56.0948	92.4446	21.161	340.097	648.408	210.158	9.30234
LYMF 015B				2nd treatment	progression 07.2020	22.008	221.673	NA	126.209	80.3549	61.0388	407.484	93.5462	NA	706.226	214.464	2771.43	2191.7	1981.6	159.923	98.3609	115.955	97.2589	173.941	70.6968	250.515	460.345	2314.91	129.142	106.607
LYMF 015C				3rd treatment		9	23.1796	20.7969	9.30297	6.39036	0	453.73	39.8231	NA	311.664	164.895	1056.88	811.945	717.891	30.2588	65.5529	0.0586742	0	17.7598	3.19518	246.777	238.279	862.237	47.9059	0.0293371
LYMF 019	27	f	Hodgkin's Lymphoma	before		12.269	61.074	58.8816	47.4222	114.291	40.0109	80.5551	100.448	115.196	1258.59	952.504	364.166	123.47	1034.96	235.834	206.634	24.0064	31.9362	55.7926	77.1508	98.7328	243.818	1070.25	221.234	27.9713
LYMF 019B				2nd treatment	remission 05.2021	2.625	10.939	NA	5.12201	0	0	NA	0	NA	70.2005	61.6172	NA	36.067	NA	14.0079	NA	0	0	8.0305	0	0	65.9088	36.067	14.0079	0
LYMF 021	57	m	Diffuse large B cell lymphoma	before		64.32	1037.65	618.525	525.863	1080.22	2096.43	223.294	194.928	60.5247	3679.48	1489.01	2953.51	3927.8	2053.4	1972.9	2652.36	32.4177	61.3153	727.347	1588.33	159.582	3440.66	2318.82	2312.63	46.8665
LYMF 021B				2nd treatment	remission 05.2021	9.85714	9.76132	0	0	68.6425	20.681	164.789	40.1164	18.7753	140.406	116.192	1499.08	1150.9	1008.34	65.9678	102.368	0	0	3.25377	44.6618	74.5602	128.299	1219.44	84.1677	0
LYMF 023	62	m	Hodgkin's Lymphoma	before		29.1667	249.831	115.085	123.53	252.237	128.715	87.0033	183.959	89.2412	4418.04	1464.13	442.571	267.995	1761.07	656.364	1216.05	46.4078	47.4895	162.815	190.476	120.068	355.283	2547.75	936.205	46.9486
LYMF 023B				2nd treatment	remission	5.26	2.71744	NA	0	7.20228	1.73219	18.0795	79.7095	NA	48.4279	13.1393	1083.41	975.377	932.431	6.14546	20.7562	0	0	1.35872	4.46724	48.8945	30.7836	997.071	13.4508	0
LYMF 024	45	m	Hodgkin's Lymphoma	before		22.5333	144.546	100.406	49.3257	42.2737	25.5367	191.028	191.796	NA	3874.19	2063.29	395.06	199.687	2006.24	161.662	156.876	24.9766	12.9218	98.0927	33.9052	191.412	297.374	2647.91	159.269	18.9492
LYMF 024B				2nd treatment	remission	29.4783	229.01	NA	47.6982	106.083	70.9923	162.596	168.509	NA	559.723	156.765	4867.85	3933.79	3135.76	83.0876	62.9613	118.594	35.3208	138.354	88.5378	165.552	358.244	3979.13	73.0244	76.9574
LYMF 035	19	m	Follicular lymphoma	before		12.048	32.001	80.9483	0.133279	18.2872	11.3335	40.1141	36.5004	331.344	1048.87	544.06	248.705	201.624	942.678	135.457	49.9015	14.2076	24.5265	37.6942	14.8103	135.986	225.164	869.571	92.6792	19.3671
LYMF 035B				2nd treatment		2.88	3.05021	0	0	0	4.11808	52.0162	16.2875	NA	19.9429	12.2392	587.205	378.353	323.849	4.08317	8.23245	0	0	1.01674	2.05904	34.1519	16.0911	429.802	6.15781	0
LYMF 036	73	m	Hodgkin's Lymphoma	before		6.54286	42.329	31.1481	27.7657	12.8058	0.379472	46.4522	16.5031	NA	752.035	NA	182.038	96.5581	563.597	52.4916	63.0177	24.3448	12.101	33.7476	6.59261	31.4776	139.298	657.816	57.7547	18.2229
LYMF 036B				2nd treatment	remission	1.34118	5.34982	NA	0	5.85818	0.023819	35.114	0.578531	NA	41.0905	24.2798	213.023	47.6157	50.9625	17.285	8.15027	9.06475	5.02814	2.67491	2.941	17.8462	32.6852	103.867	12.7176	7.04644
LYMF 039	47	f	Follicular lymphoma	before		23.2	1320.04	853.582	672.348	277.432	208.413	385.357	107.183	211.272	1779.09	973.926	1170.18	447.612	1106.28	500.717	387.152	381.984	221.425	948.658	242.922	234.604	808.893	1241.4	443.934	301.705
LYMF 039B				2nd treatment		7.52308	21.8366	NA	2.95477	5.19673	3.51922	8.61405	81.2664	NA	171.261	26.5057	1333.93	1438.14	NA	23.0671	61.3775	2.36881	2.54384	12.3957	4.35797	44.9402	98.8833	1386.03	42.2223	2.45633
LYMF 039C				3rd treatment	remission	3.62222	12.9561	0.721587	0	7.16916	0	56.8866	26.1721	NA	127.366	36.6939	684.874	408.606	464.75	23.141	37.3684	4.93168	4.02295	4.55923	3.58458	41.5293	82.03	519.41	30.2547	4.47731
LYMF 057	26		Hodgkin's Lymphoma	before		6.14483	15.0828	4.0586	10.0697	11.5961	5.01469	NA	45.816	NA	212.715	49.5218	1076.58	586.569	588.509	18.331	40.932	3.96113	2.66305	9.73703	8.30538	45.816	131.118	750.553	29.6315	3.31209
LYMF 057B				2nd treatment	remission	5.34	7.39103	NA	0	14.2209	13.7203	NA	NA	NA	NA	NA	NA	557.126	NA	NA	NA	0	NA	3.69552	13.9706	NA	NA	557.126	NA	0
LYMF 058	21		Hodgkin's Lymphoma	before		7.48	27.5142	NA	12.4108	7.46973	13.9786	NA	NA	NA	195.637	94.916	1374.91	545.495	NA	46.4646	NA	6.80953	0	19.9625	10.7242	NA	145.277	960.203	46.4646	3.40477
LYMF 058B				2nd treatment	remission	4.53	45.6	NA	0	0	38.2674	NA	1.20508	NA	NA	NA	NA	152.705	NA	9.45961	NA	NA	NA	22.8	19.1337	1.20508	NA	152.705	9.45961	NA
LYMF 060A	39		Hodgkin's Lymphoma	before		7.8	13.9335	NA	0	0	15.2794	NA	19.042	NA	169.095	53.3725	NA	294.832	NA	33.0802	NA	16.0252	19.1938	6.96677	7.63971	19.042	111.234	294.832	33.0802	17.6095
LYMF 060B				2nd treatment	remission	4.09565	23.2866	NA	0	10.9761	10.0508	NA	36.1592	NA	70.8848	NA	NA	132.072	NA	NA	NA	0	0	8.26362	7.64475	29.5839	52.2761	512.674	4.4301	0
LYMF 067A	61		Follicular lymphoma	before		110.5	28577.9	28522.8	3656.98	319.497	121.27	316.41	75.9681	33.2158	664.49	323.227	6272.23	492.56	442.698	531.747	821.875	22.3977	0	20252.6	220.383	141.865	493.858	2402.49	676.811	11.1988
LYMF 067B				2nd treatment	remission	2.37391	10.1876	NA	0.250626	16.7507	5.4561	NA	23.5309	NA	149.882	NA	NA	157.273	NA	32.0927	NA	0.230765	0	5.21909	11.1034	23.5309	149.882	157.273	32.0927	0.115383
LYMF 068A	56		Hodgkin's Lymphoma	before		12.975	18.9638	NA	24.7802	2.08232	18.2221	NA	15.3372	NA	434.922	NA	NA	1073.95	NA	NA	NA	0	9.06555	21.872	10.1522	15.3372	434.922	1073.95	NA	4.53277
LYMF 068B				2nd treatment	remission	11.3143	113.367	NA	58.8509	57.6786	27.1795	197.267	65.3937	NA	467.978	121.735	951.617	330.038	233.046	110.437	94.2972	13.7459	7.83371	86.1091	42.4291	131.33	294.857	504.9	102.367	10.7898
LYMF HMT			Follicular lymphoma	before		2.35	41.7943	42.2215	25.2006	33.7115	39.2727	36.6432	34.8245	78.9996	226.511	235.386	88.498	77.885	173.268	88.6579	45.9102	40.7987	20.8449	36.4055	36.4921	50.1558	83.1915	202.108	67.284	30.8218
LYMF HMT-B				2nd treatment		11.325	9.34775	NA	0	25.694	2.19369	NA	105.816	NA	201.541	40.9994	2068.41	1649.69	NA	42.6933	NA	7.76254	0	4.67388	13.9438	105.816	121.27	1859.05	42.6933	3.88127
LYMF HMT-C				3rd treatment	remission	30.0375	3.95368	NA	0	35.6741	18.0531	NA	325.418	NA	432.635	107.655	5900.28	4651.08	NA	88.506	NA	9.97956	0	1.97684	26.8636	325.418	270.145	5275.68	88.506	4.98978
