# Supplementary figures and images for: Remote immune processes revealed by immune-derived circulating cell-free DNA
Source: eLife journal article supplement (doi:10.7554/elife.70520), 2021-11-26

Figure 5-figure supplement 3

A

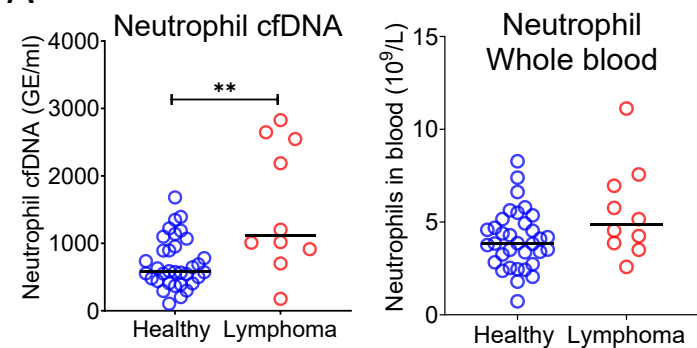

B

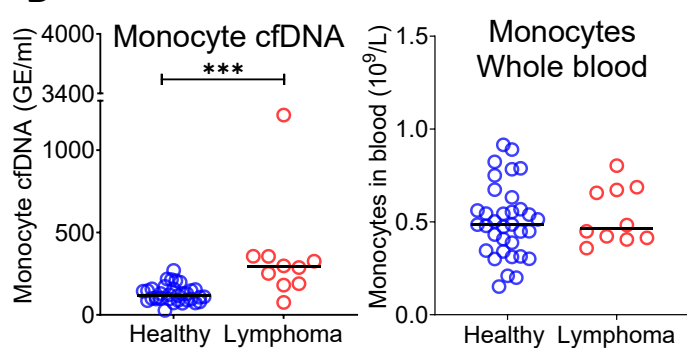

C

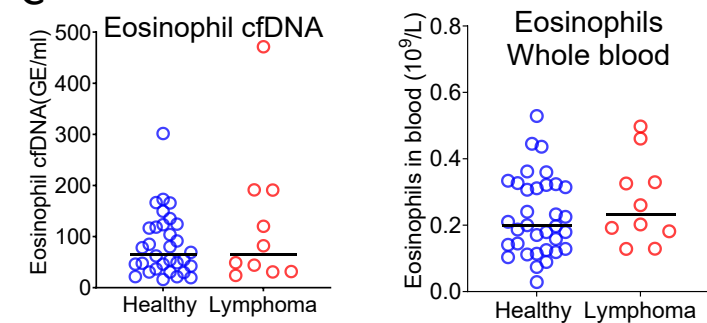

D

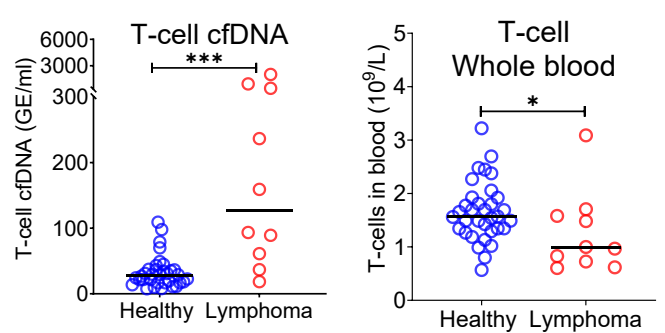

E

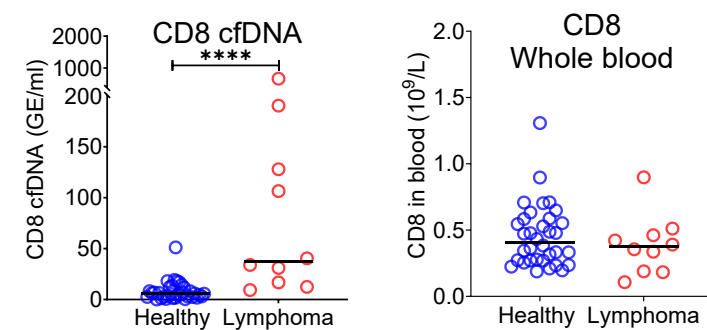

F

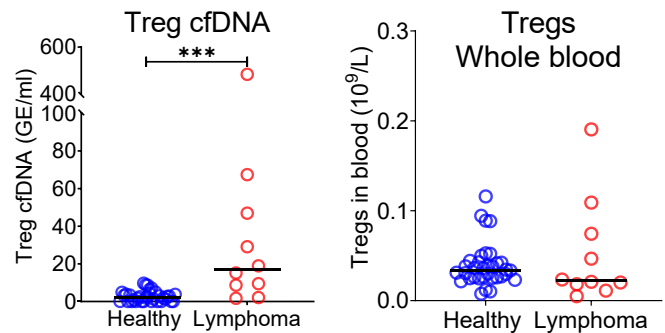

Supplement: supp [file elife-70520-supp-v1.zip]

Figure 5-figure supplement 2

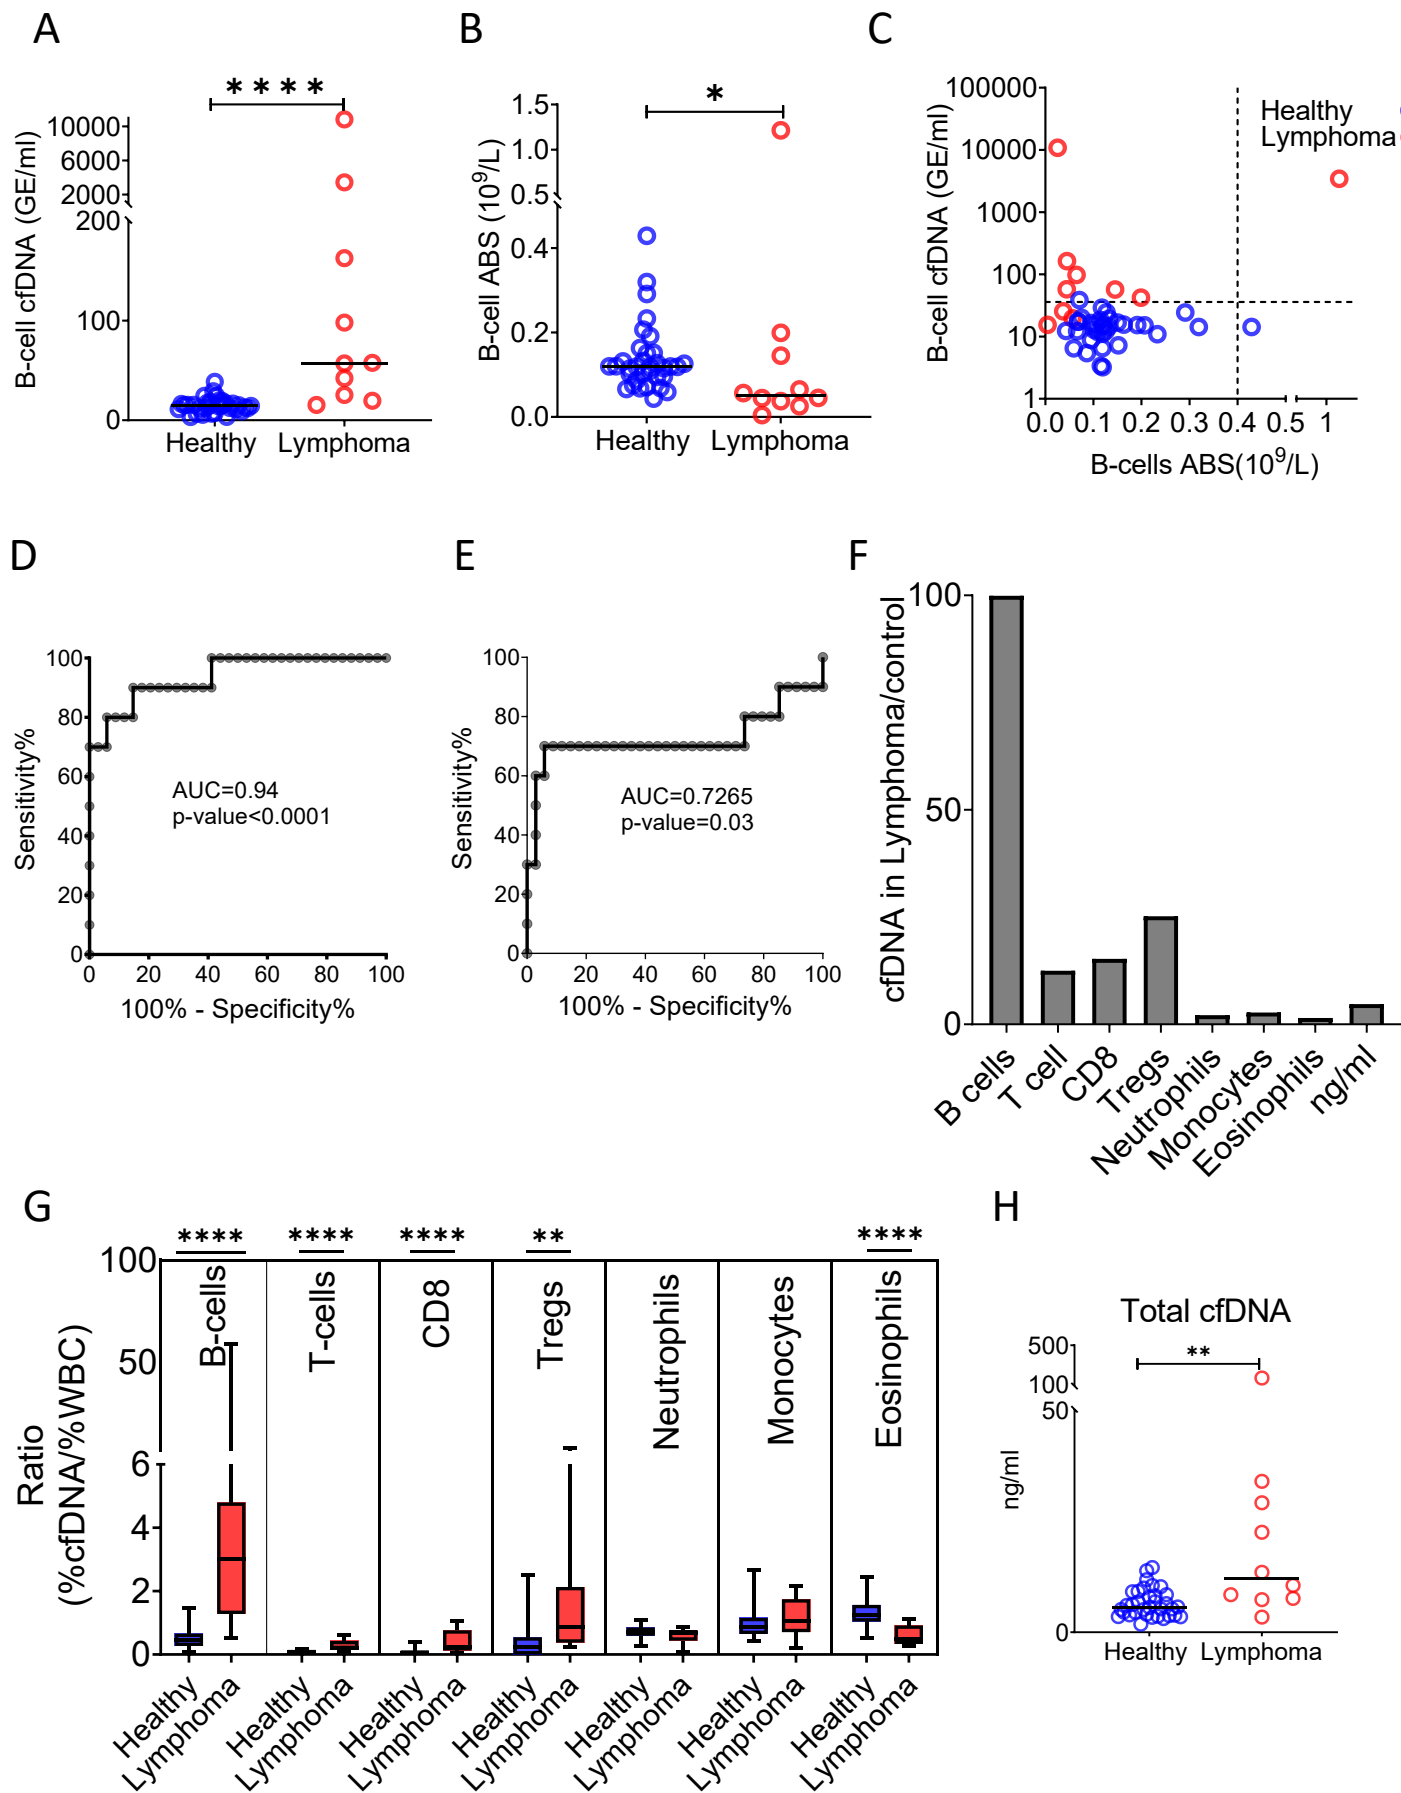

Supplement: supp [file elife-70520-supp-v1.zip]

Figure 3-figure supplement 2

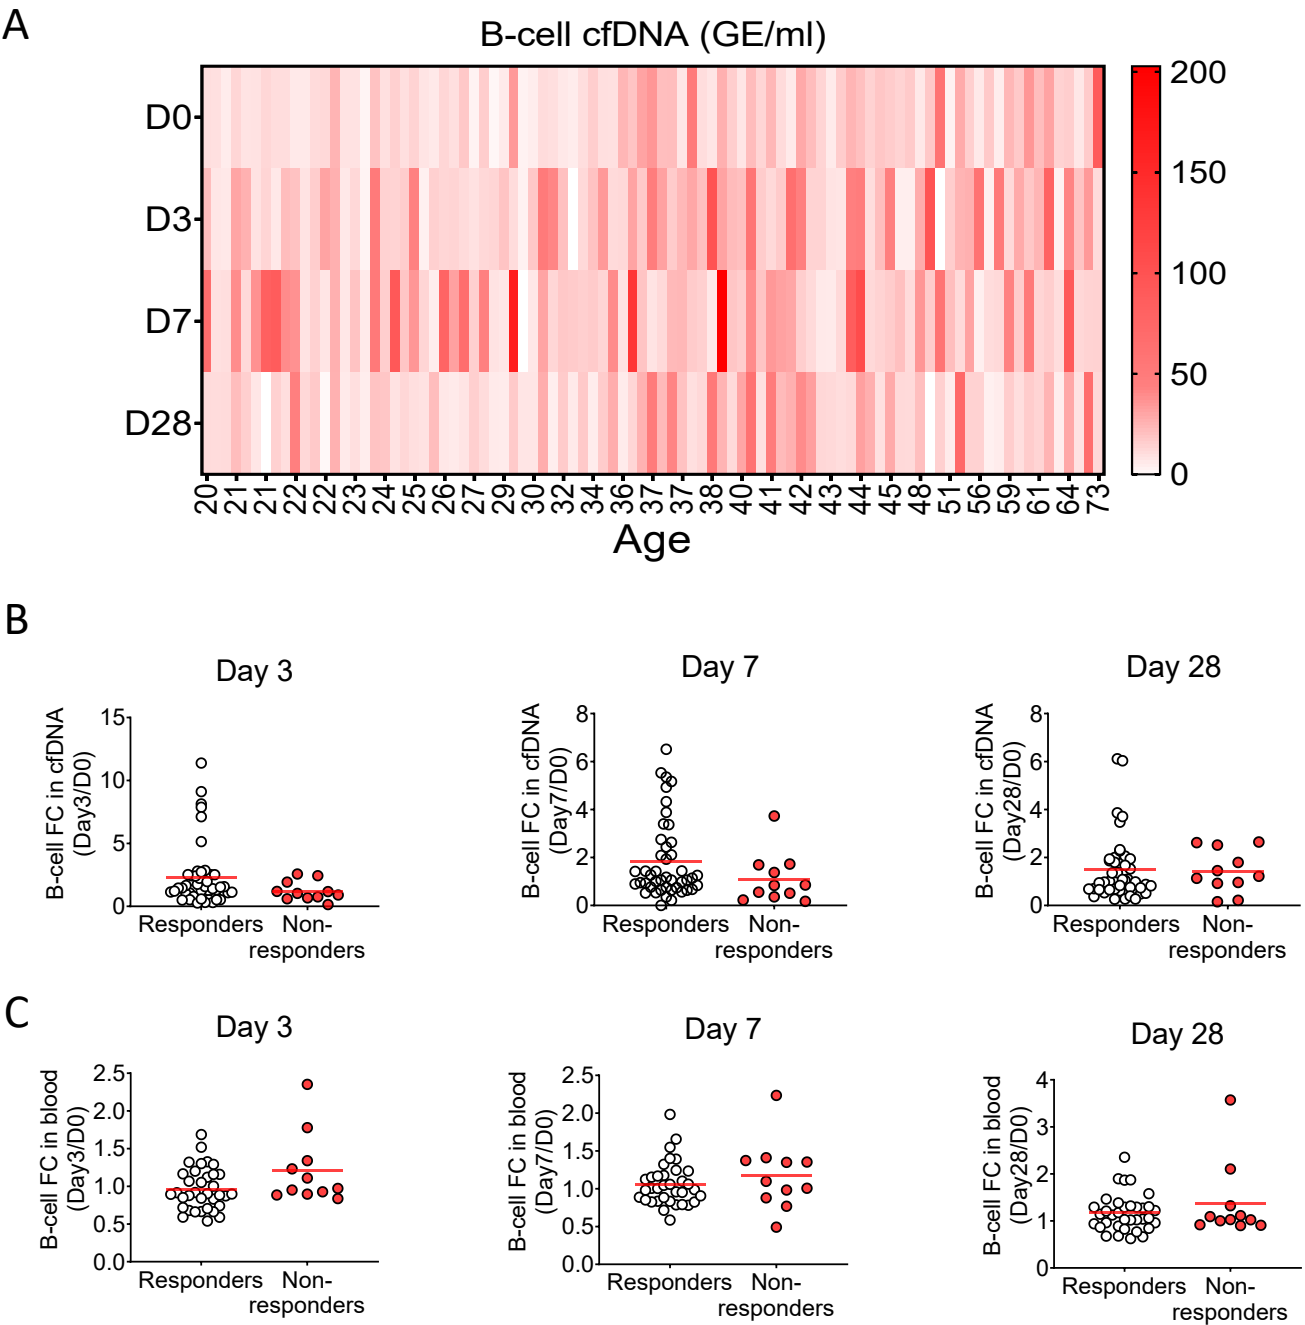

Supplement: supp [file elife-70520-supp-v1.zip]

Figure 5-figure supplement 1

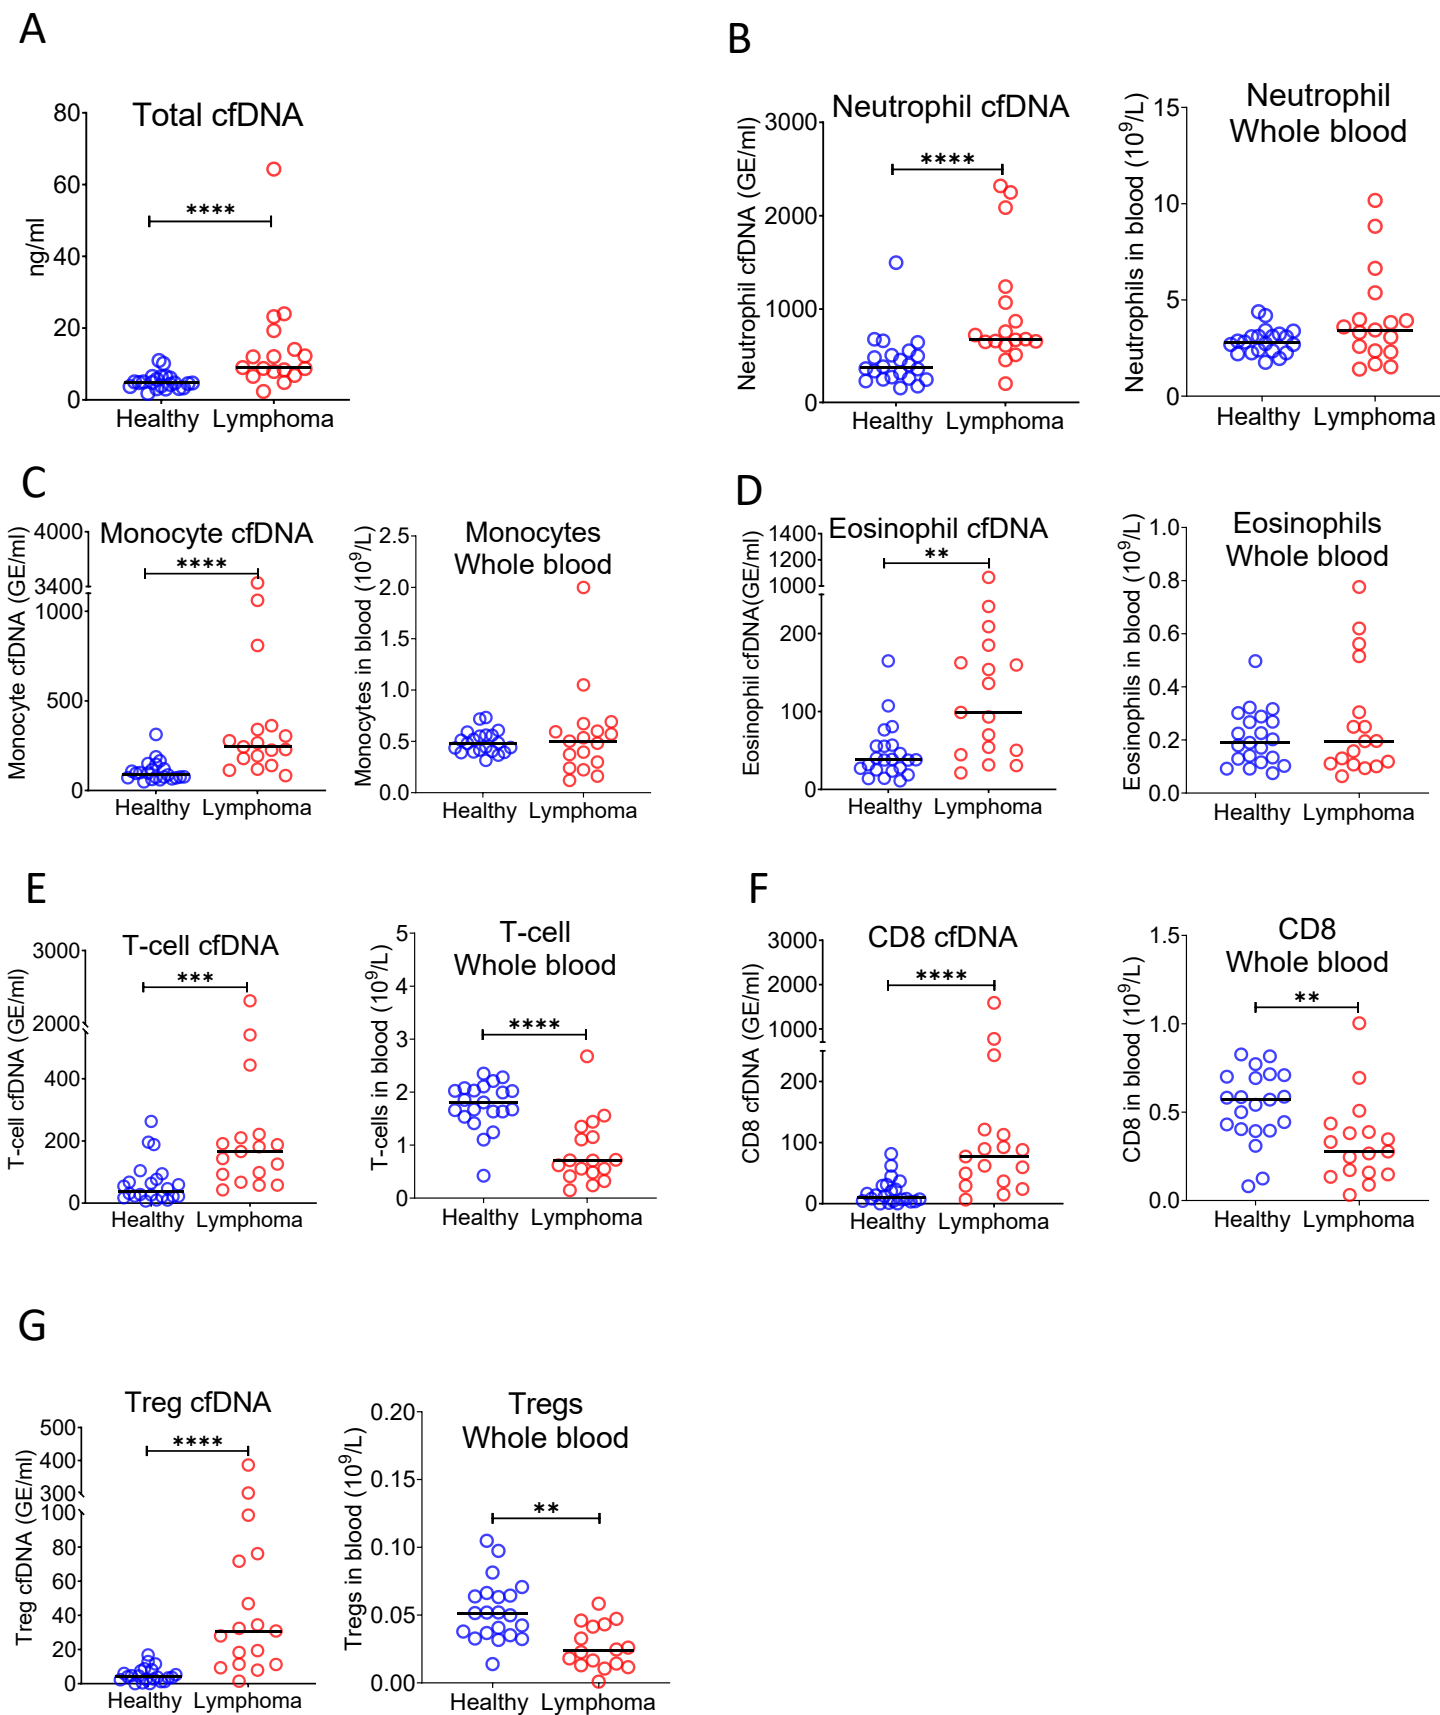

Supplement: supp [file elife-70520-supp-v1.zip]

Figure 2-figure supplement 2

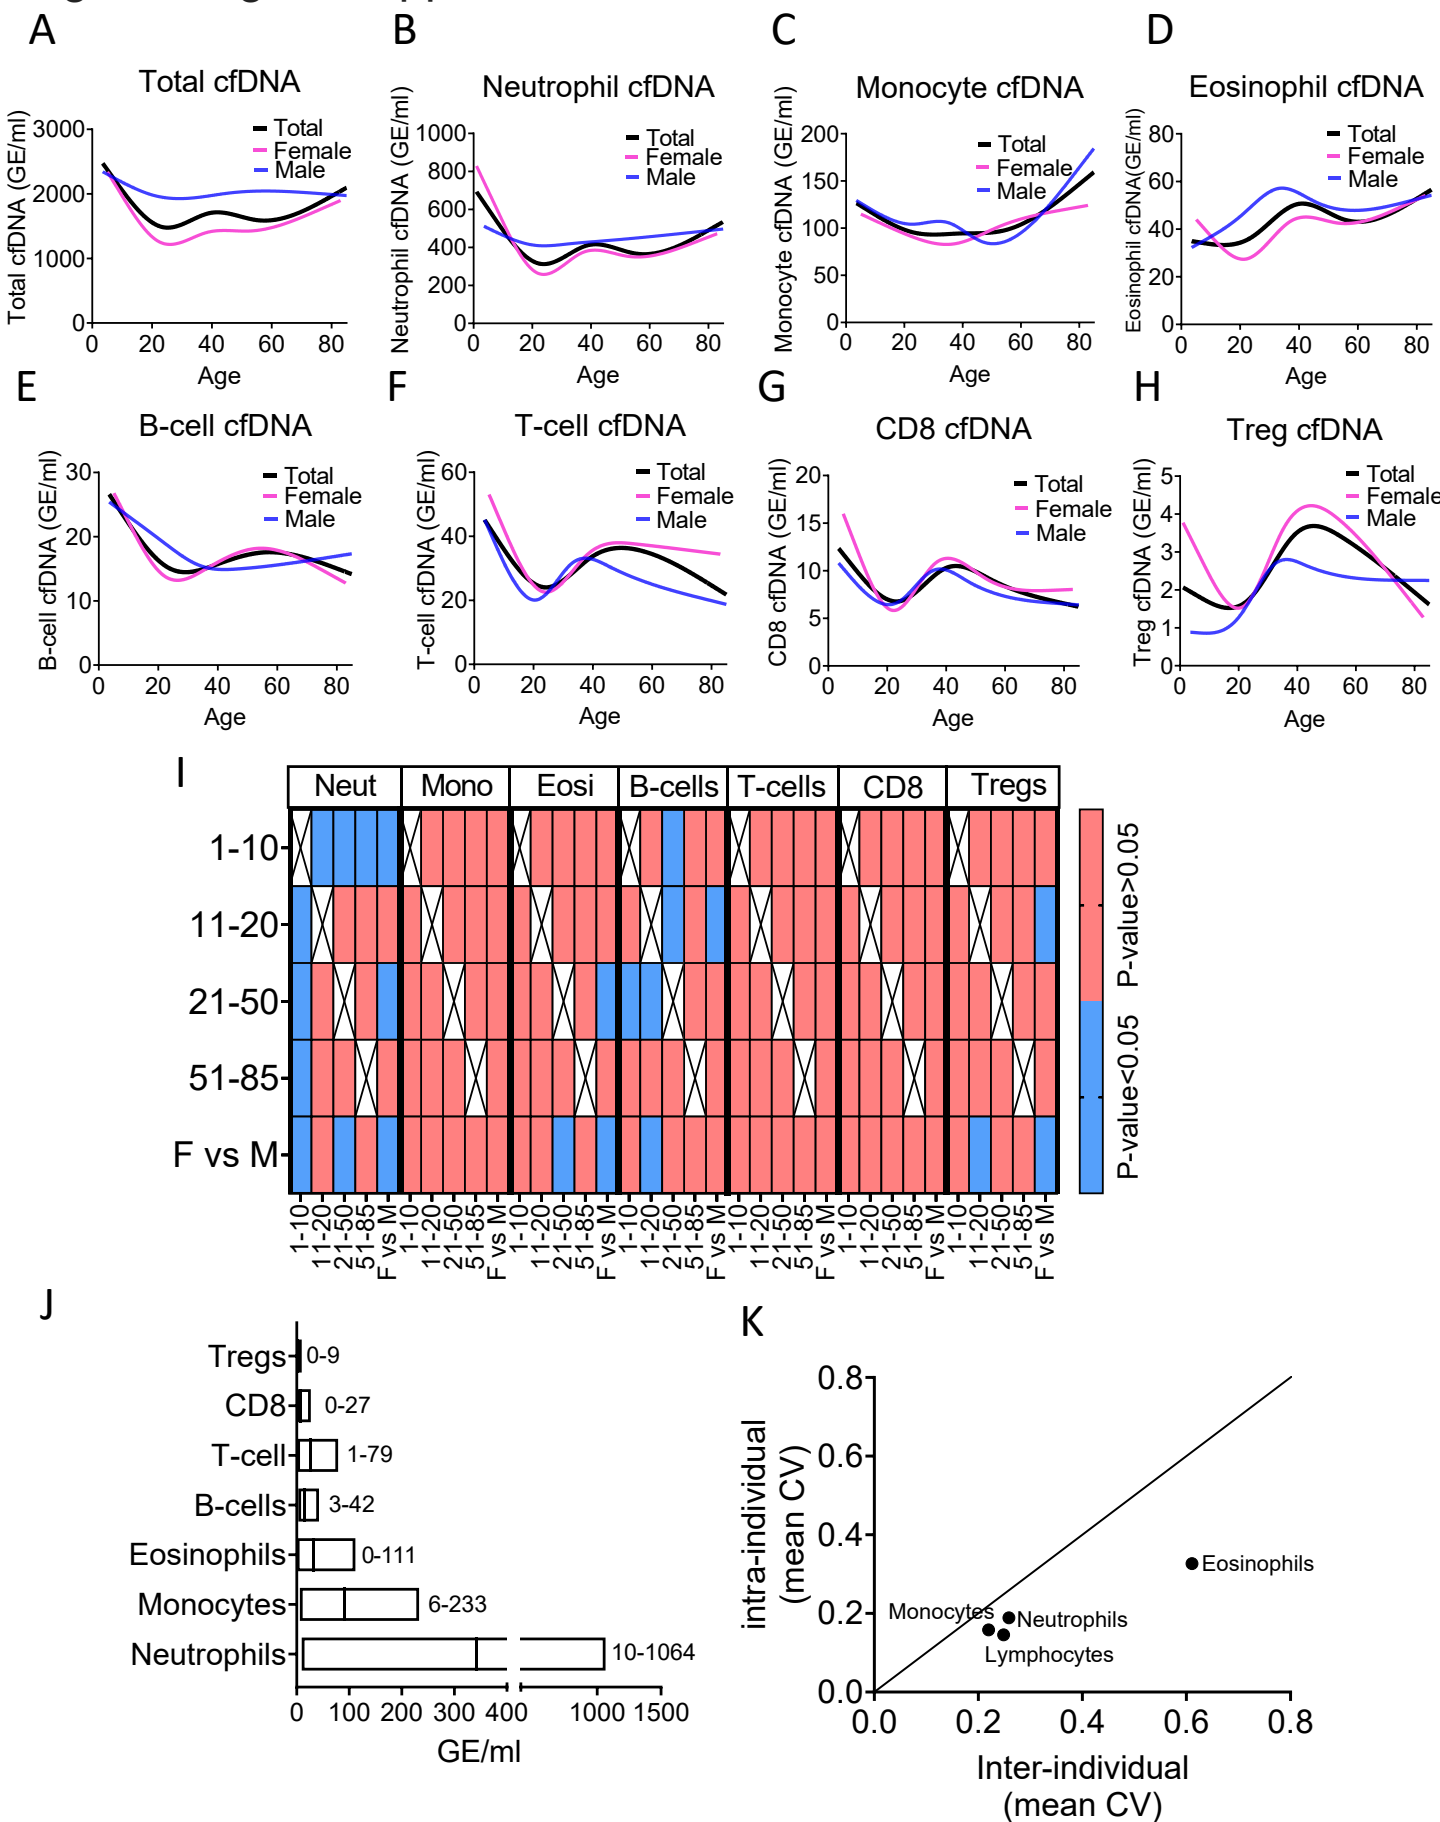

Supplement: supp [file elife-70520-supp-v1.zip]

Figure 2-figure supplement 1

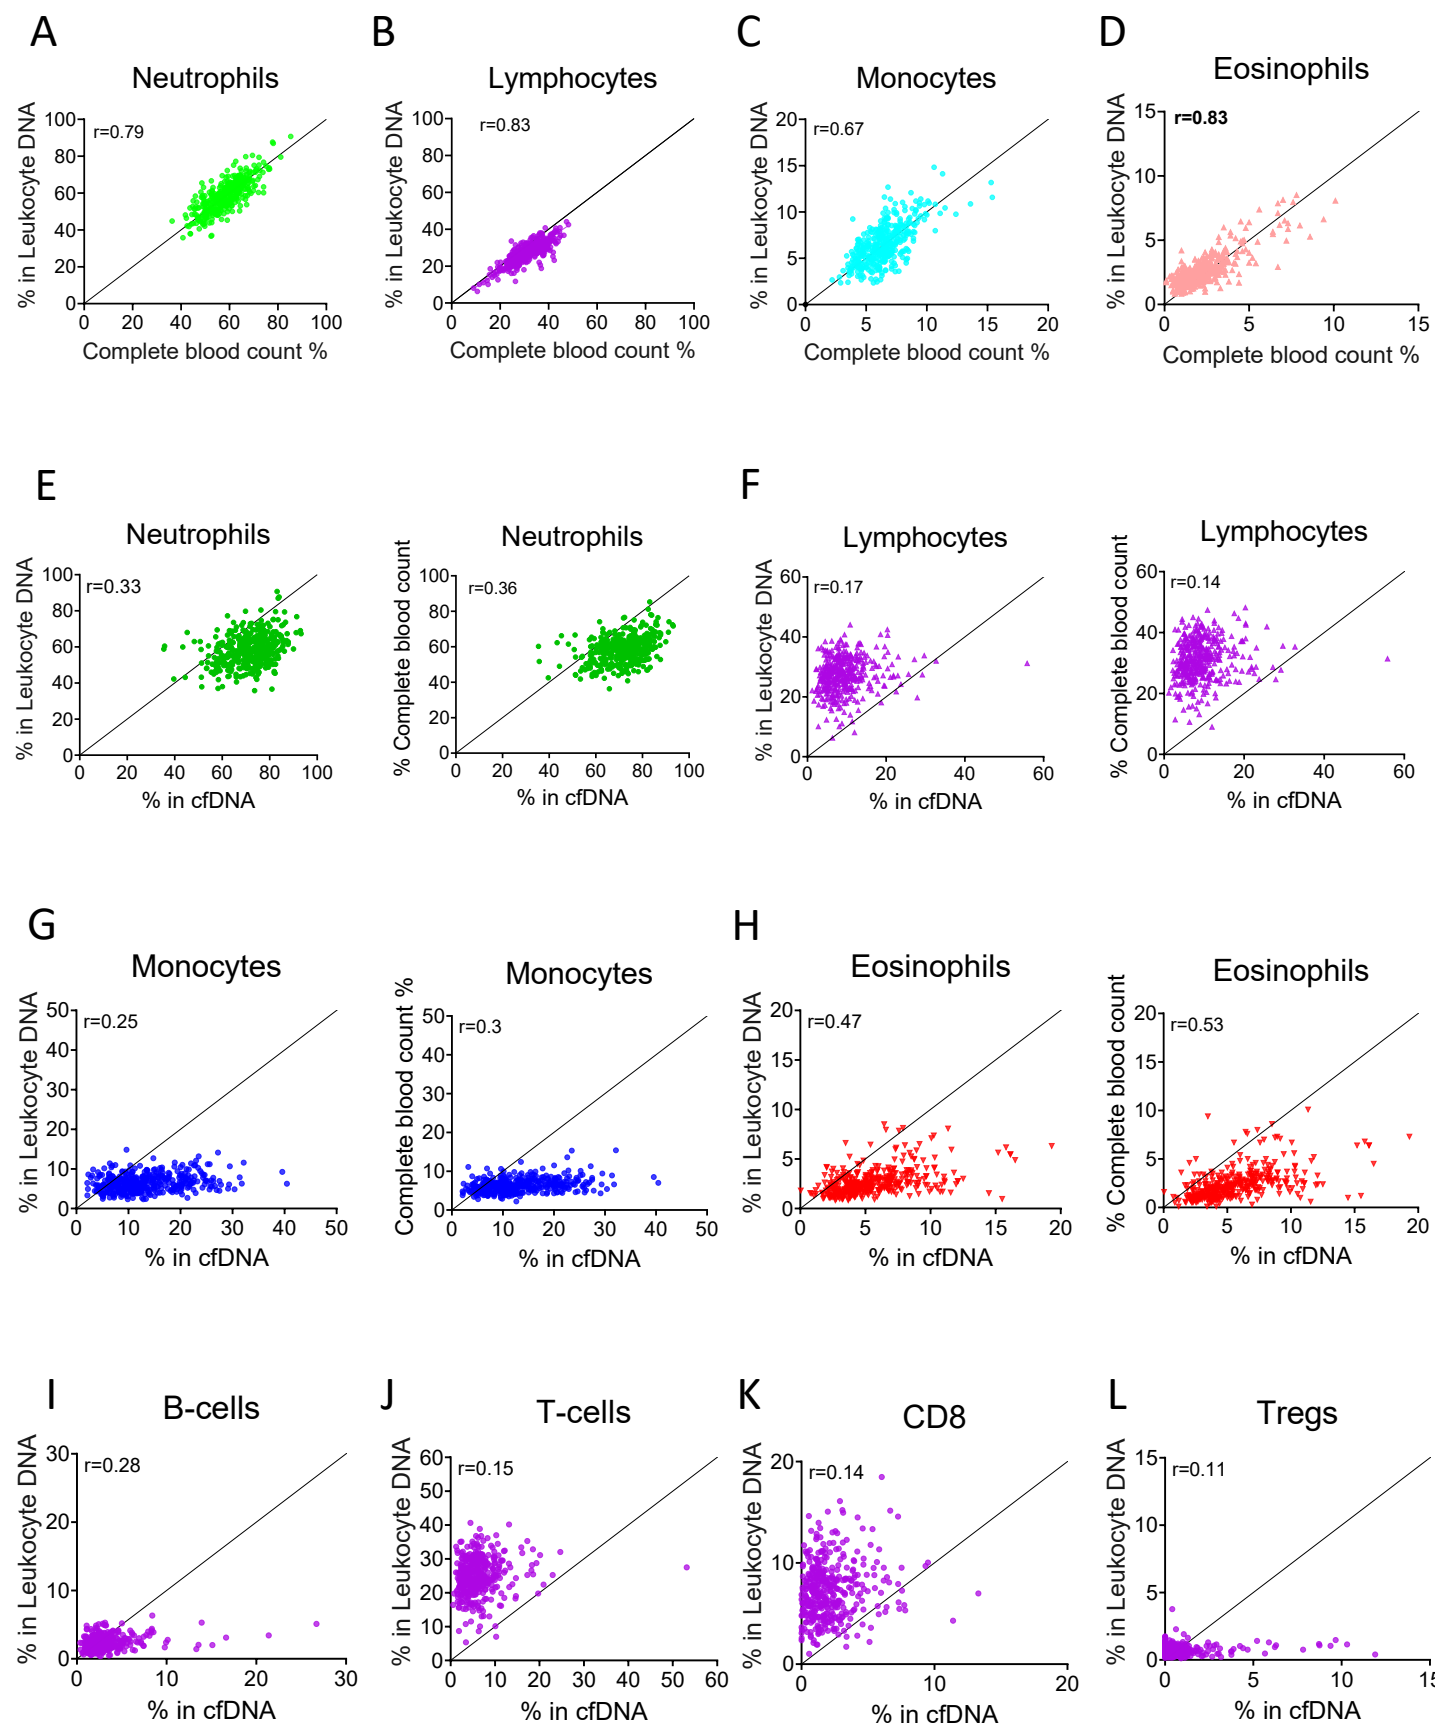

Supplement: supp [file elife-70520-supp-v1.zip]

Figure 3-figure supplement 1

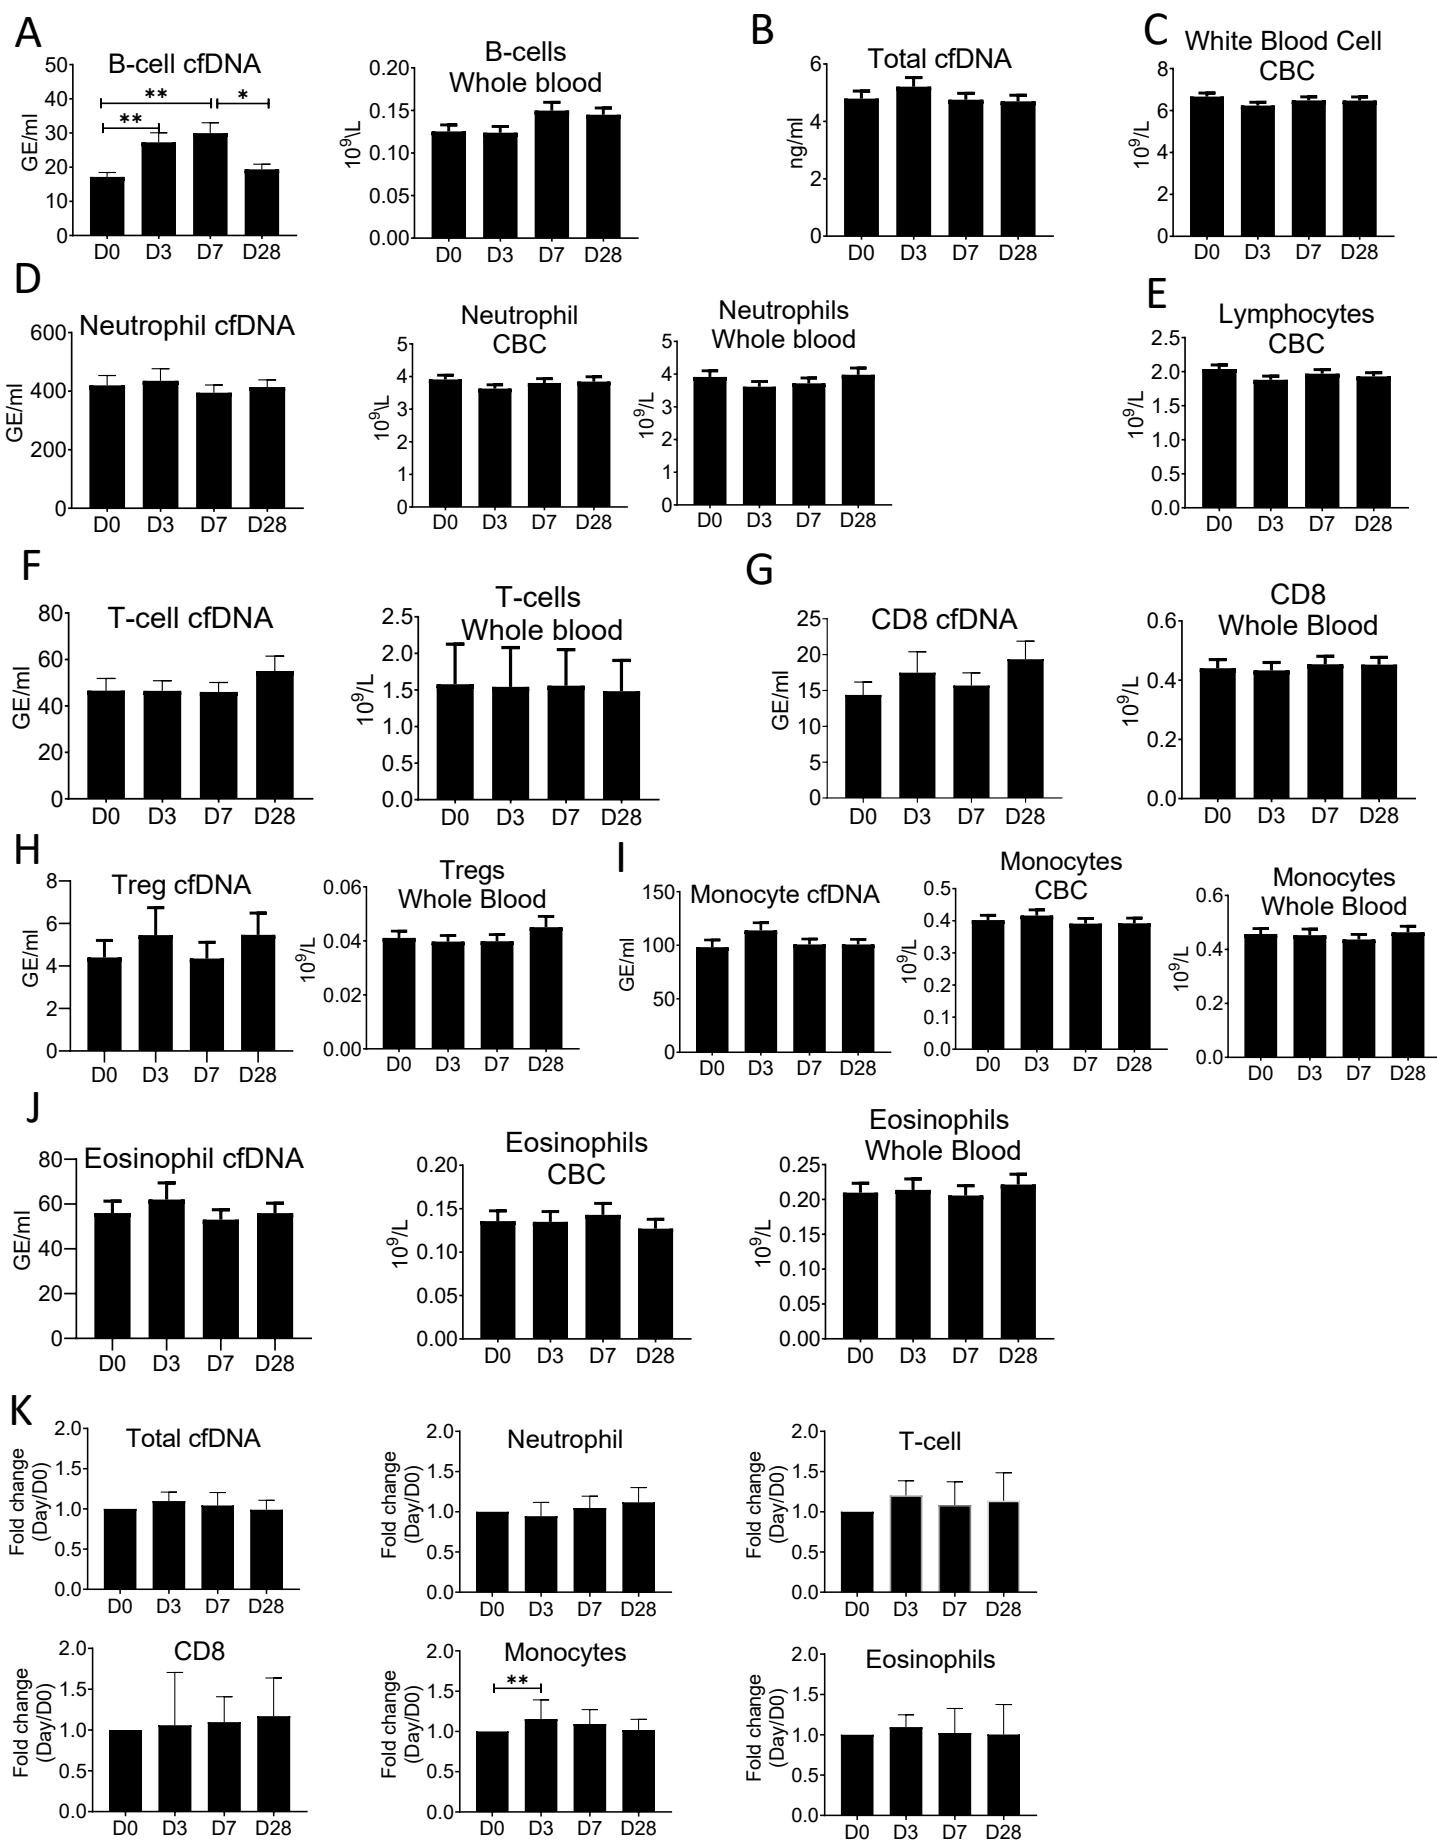

Supplement: supp [file elife-70520-supp-v1.zip]

Figure 4-figure supplement 1

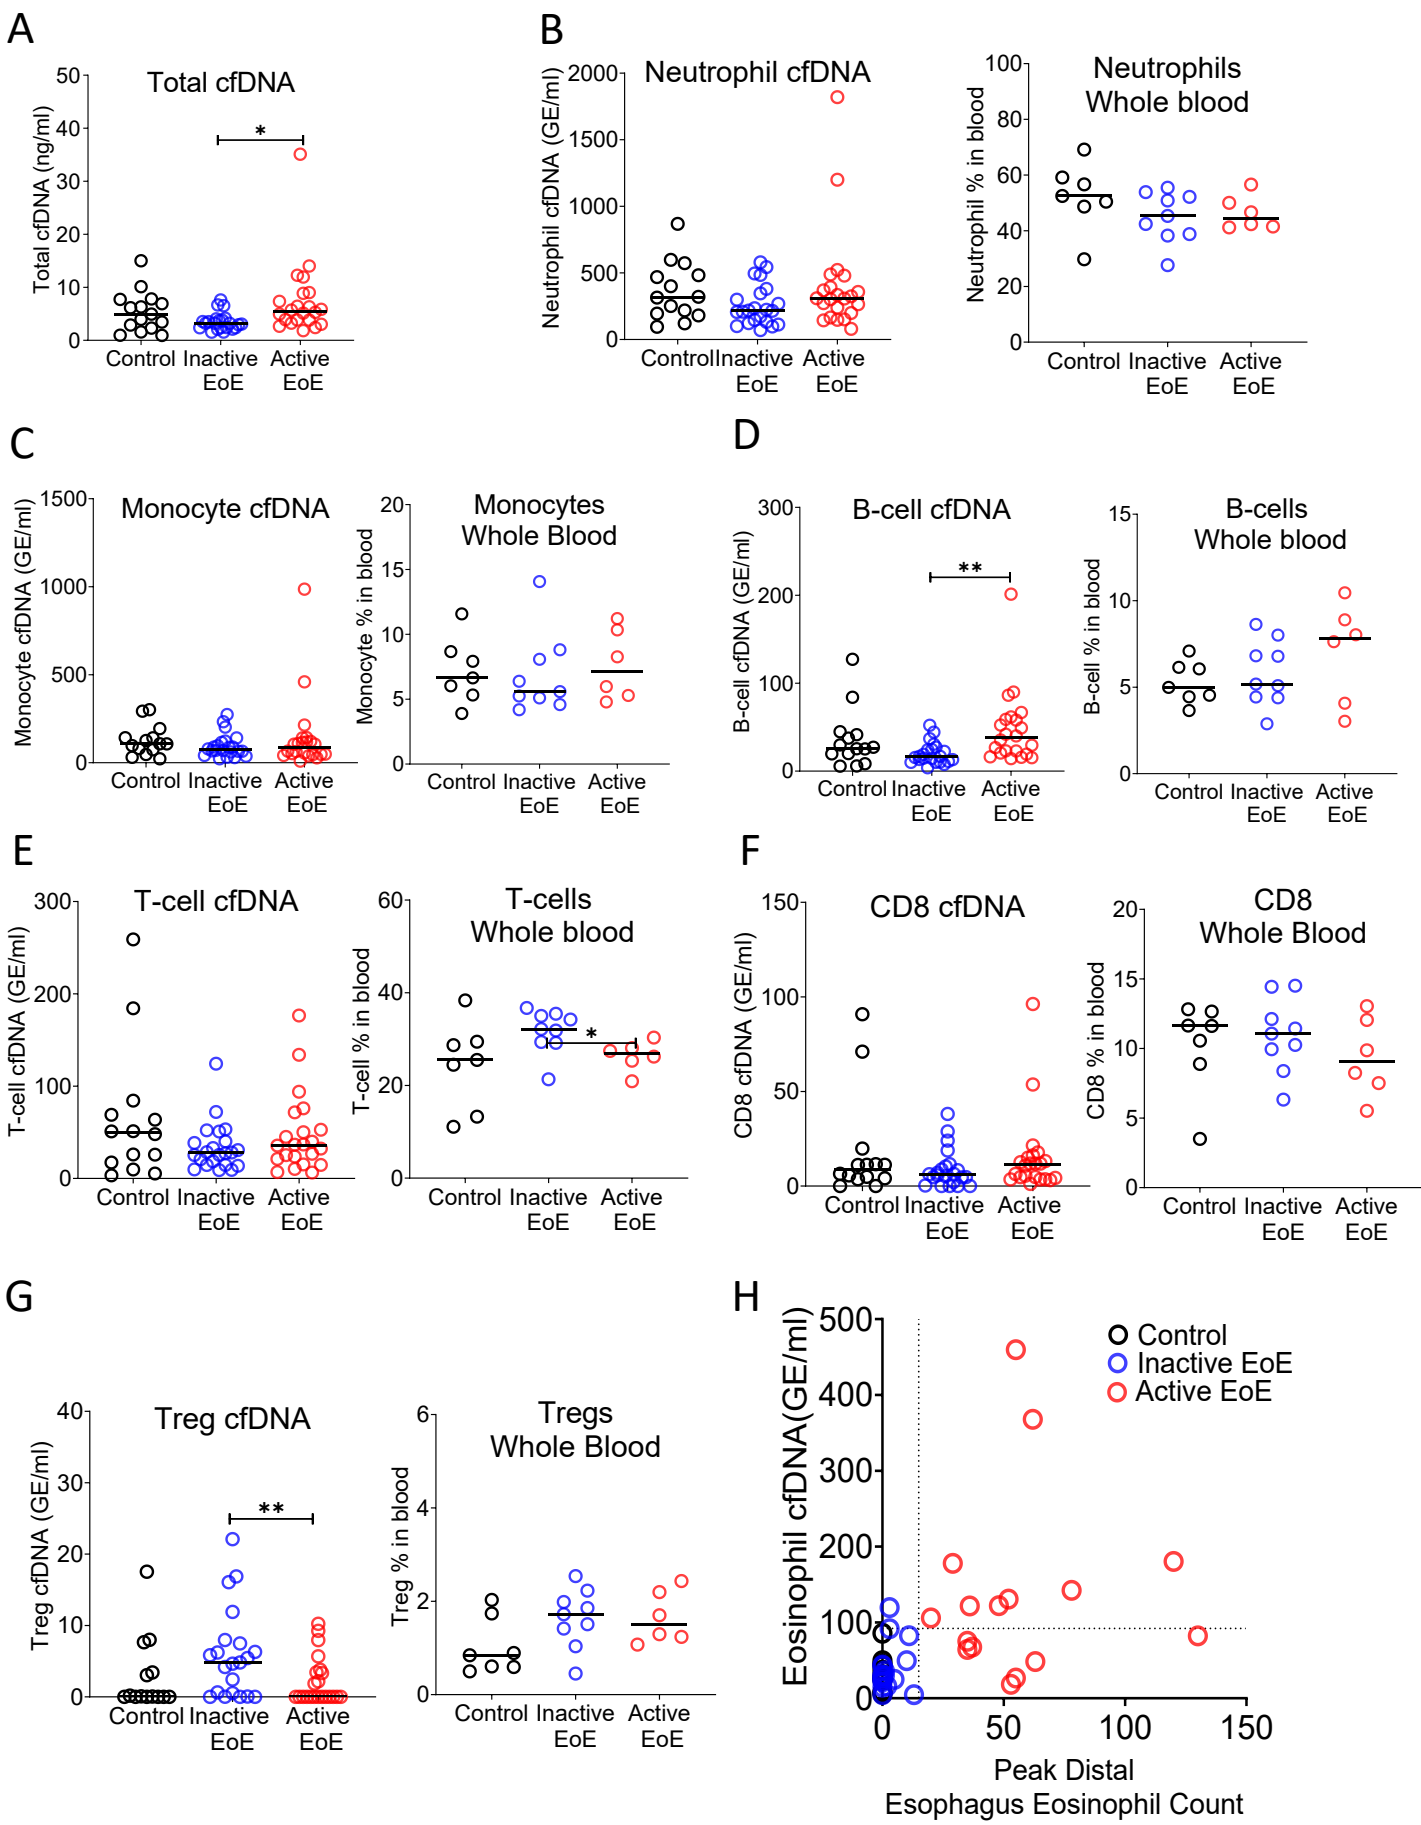

Supplement: supp [file elife-70520-supp-v1.zip]

Figure 1-figure supplement 1

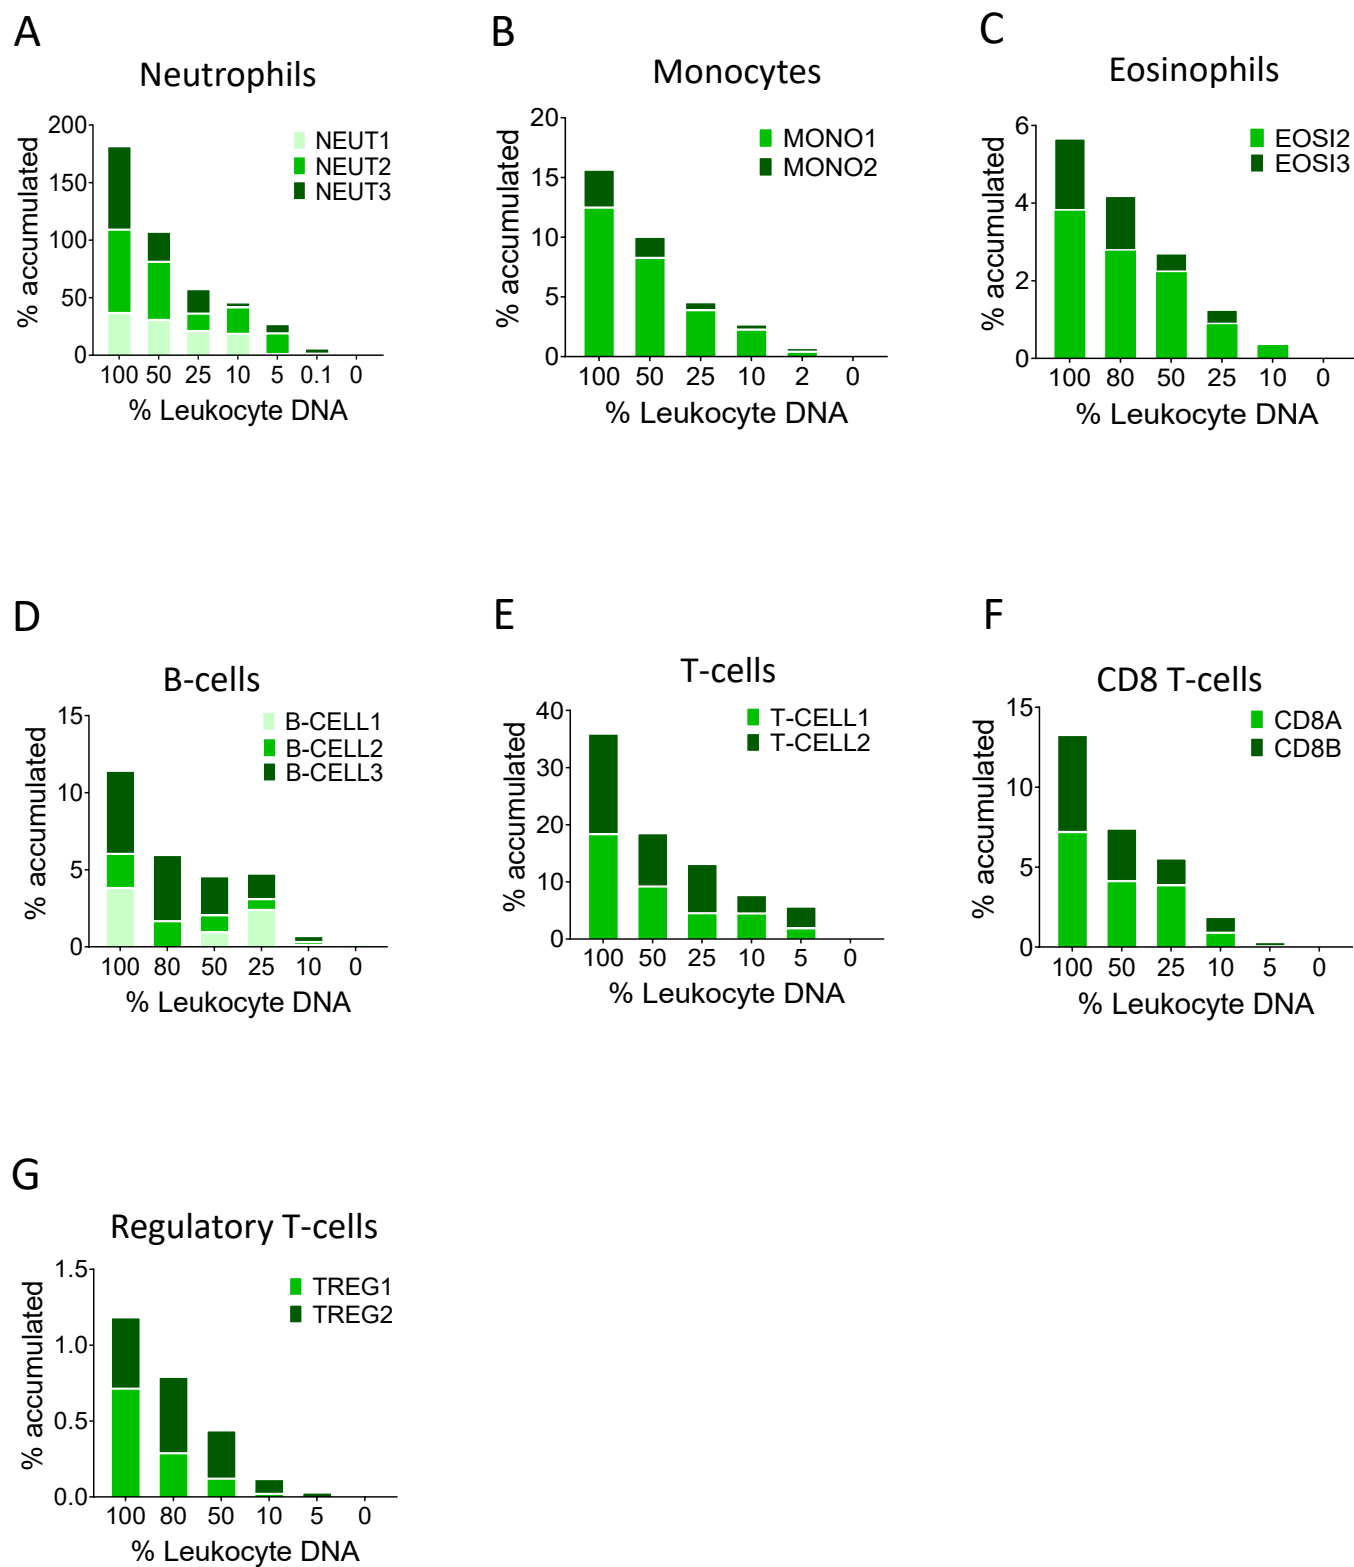

Supplement: supp [file elife-70520-supp-v1.zip]
